# Supplementary material for: Molecular Differences between Squamous Cell Carcinoma and Adenocarcinoma Cervical Cancer Subtypes: Potential Prognostic Biomarkers
Source: Curr Oncol. 2022 Jul 5;29(7):4689–702. doi: 10.3390/curroncol29070372 (PMC9322365; doi:10.3390/curroncol29070372)
Supplement: Supplementary file 1 [file curroncol-29-00372-s001.zip]

Archive with 6 entries (6 files):
- Figure S1.pdf
- Table_S1.xlsx
- Table_S2.xlsx
- Table_S3.csv
- Table_S4.xlsx
- Table_S5.xlsx
