# Supplementary material for: Molecular Differences between Squamous Cell Carcinoma and Adenocarcinoma Cervical Cancer Subtypes: Potential Prognostic Biomarkers
Source: Curr Oncol. 2022 Jul 5;29(7):4689–702. doi: 10.3390/curroncol29070372 (PMC9322365; doi:10.3390/curroncol29070372)
Supplement: Supplementary file 1 [file curroncol-29-00372-s001.zip › Table_S1.xlsx]

## Sheet: Supp_file_4
Table S1. Clinical data of the TCGA cohort
	bcr_patient_uuid	bcr_patient_barcode	form_completion_date	prospective_collection	retrospective_collection	birth_days_to	gender	menopause_status	height_cm_at_diagnosis	weight_kg_at_diagnosis	history_hormonal_contraceptives_use	race	live_birth_pregnancy_count	ethnicity	pregnancies_count_induced_abortion	history_neoadjuvant_treatment	pregnancies_count_ectopic	tumor_status	pregnancies_count_stillbirth	total_pregnancy_count	vital_status	last_contact_days_to	death_days_to	cause_of_death	cause_of_death_other	pregnancies_count_miscarriage	karnofsky_score	pregnant_at_diagnosis	radiation_treatment_adjuvant	radiation_treatment_adjuvant_1	tobacco_smoking_age_started	tobacco_smoking_history_indicator	tobacco_smoking_year_stopped	tobacco_smoking_pack_years_smoked	history_immunosuppressive_disease	other_immunosuppressive_disease	ecog_score	hiv_status	performance_status_timing	performance_status_other_timing	nadir_cd4_counts	cd4_counts_at_diagnosis	hiv_rna_load_at_diagnosis	treatment_outcome_first_course	prior_aids_conditions	hbv_test_results	histologic_diagnosis	hcv_test_results	hpv_test_results
1	bcr_patient_uuid	bcr_patient_barcode	form_completion_date	tissue_prospective_collection_indicator	tissue_retrospective_collection_indicator	days_to_birth	gender	menopause_status	height	weight	birth_control_pill_history_usage_category	race	number_of_successful_pregnancies_which_resulted_in_at_least_1_live_birth	ethnicity	patient_pregnancy_therapeutic_abortion_count	history_of_neoadjuvant_treatment	ectopic_pregnancy_count	person_neoplasm_cancer_status	pregnancy_stillbirth_count	total_number_of_pregnancies	vital_status	days_to_last_followup	days_to_death	patient_death_reason	death_cause_text	patient_pregnancy_spontaneous_abortion_count	karnofsky_performance_score	pregnant_at_diagnosis	radiation_therapy	radiation_therapy	age_began_smoking_in_years	tobacco_smoking_history	stopped_smoking_year	number_pack_years_smoked	patient_history_immune_system_and_related_disorders_name	patient_history_immune_system_and_related_disorders_text	eastern_cancer_oncology_group	hiv_status	performance_status_scale_timing	assessment_timepoint_category	nadir_cd4_counts	cd4_counts_at_diagnosis	hiv_rna_load_at_diagnosis	primary_therapy_outcome_success	prior_aids_conditions	hbv_test	histological_type	hcv_test	hpv_test
2	CDE_ID:	CDE_ID:2003301	CDE_ID:	CDE_ID:3088492	CDE_ID:3088528	CDE_ID:3008233	CDE_ID:2200604	CDE_ID:2957270	CDE_ID:649	CDE_ID:651	CDE_ID:3104217	CDE_ID:2192199	CDE_ID:2183299	CDE_ID:2192217	CDE_ID:2180648	CDE_ID:3382737	CDE_ID:2261915	CDE_ID:2759550	CDE_ID:2183304	CDE_ID:2180638	CDE_ID:5	CDE_ID:3008273	CDE_ID:3165475	CDE_ID:2554674	CDE_ID:2004150	CDE_ID:2180637	CDE_ID:2003853	CDE_ID:2005346	CDE_ID:2005312	CDE_ID:2005312	CDE_ID:2178045	CDE_ID:2181650	CDE_ID:2228610	CDE_ID:2955385	CDE_ID:3151446	CDE_ID:3151449	CDE_ID:88	CDE_ID:2180464	CDE_ID:2792763	CDE_ID:3151756	CDE_ID:2684395	CDE_ID:2922654	CDE_ID:2922674	CDE_ID:2786727	CDE_ID:2679581	CDE_ID:2180456	CDE_ID:3081934	CDE_ID:2695021	CDE_ID:2230033
3	5AEAC31A-176A-4F93-A376-A93A670821BB	TCGA-2W-A8YY	2014-05-15	YES	NO	-18886	FEMALE	Pre (<6 months since LMP AND no prior bilateral ovariectomy AND not on estrogen replacement)	160	42	Former User	WHITE	1	NOT HISPANIC OR LATINO	0	No	0	TUMOR FREE	0	1	Alive	148	[Not Applicable]	[Not Available]	[Not Available]	0	[Not Available]	NO	[Not Available]	YES	[Not Available]	4	2000	[Not Available]	[Not Evaluated]	[Not Available]	1	[Not Available]	Post-Adjuvant Therapy	[Not Applicable]	[Not Available]	[Not Available]	[Not Available]	Complete Remission/Response	[Not Available]	[Not Available]	Adenosquamous	[Not Available]	[Not Available]
4	53EAC147-7EB8-4C54-A982-5E058D6749F8	TCGA-4J-AA1J	2014-11-13	YES	NO	-11611	FEMALE	Pre (<6 months since LMP AND no prior bilateral ovariectomy AND not on estrogen replacement)	165	48	Never Used	WHITE	4	NOT HISPANIC OR LATINO	0	No	0	TUMOR FREE	0	4	Alive	226	[Not Applicable]	[Not Available]	[Not Available]	0	[Not Available]	YES	[Not Available]	YES	[Not Available]	1	[Not Available]	[Not Available]	[Not Available]	[Not Available]	0	[Not Available]	Post-Adjuvant Therapy	[Not Applicable]	[Not Available]	[Not Available]	[Not Available]	Complete Remission/Response	[Not Available]	[Not Available]	Cervical Squamous Cell Carcinoma	[Not Available]	[Not Available]
5	39a3120c-0889-4a10-816a-e07528a35f7a	TCGA-BI-A0VR	2011-04-01	NO	YES	-19473	FEMALE	Post (prior bilateral ovariectomy OR >12 mo since LMP with no prior hysterectomy)	[Not Available]	[Not Available]	[Not Available]	WHITE	0	NOT HISPANIC OR LATINO	[Not Available]	No	1	TUMOR FREE	3	6	Alive	1505	[Not Applicable]	[Not Available]	[Not Available]	2	[Not Available]	[Not Available]	[Not Available]	[Not Available]	22	4	1995	20	[Not Available]	[Not Available]	[Not Available]	[Not Available]	[Not Available]	[Not Applicable]	[Not Available]	[Not Available]	[Not Available]	[Not Available]	[Not Available]	[Not Available]	Cervical Squamous Cell Carcinoma	[Not Available]	[Not Available]
6	3923a64a-f8d7-4e3e-9218-cee642da21db	TCGA-BI-A0VS	2011-04-05	NO	YES	-17839	FEMALE	Pre (<6 months since LMP AND no prior bilateral ovariectomy AND not on estrogen replacement)	[Not Available]	[Not Available]	[Not Available]	WHITE	[Not Available]	NOT HISPANIC OR LATINO	0	No	1	TUMOR FREE	0	[Not Available]	Alive	925	[Not Applicable]	[Not Available]	[Not Available]	0	[Not Available]	[Not Available]	[Not Available]	[Not Available]	[Not Available]	2	[Not Available]	[Not Available]	[Not Available]	[Not Available]	[Not Available]	[Not Available]	[Not Available]	[Not Applicable]	[Not Available]	[Not Available]	[Not Available]	[Not Available]	[Not Available]	[Not Available]	Cervical Squamous Cell Carcinoma	[Not Available]	[Not Available]
7	f40468de-3b86-4922-9951-f8ae28da6af0	TCGA-BI-A20A	2011-10-05	NO	YES	-18215	FEMALE	[Not Available]	167	59	[Not Available]	WHITE	2	NOT HISPANIC OR LATINO	[Not Available]	No	[Not Available]	TUMOR FREE	[Not Available]	2	Alive	72	[Not Applicable]	[Not Available]	[Not Available]	[Not Available]	[Not Available]	[Not Available]	[Not Available]	[Not Available]	[Not Available]	[Not Available]	[Not Available]	[Not Available]	[Not Available]	[Not Available]	[Not Available]	[Not Available]	[Not Available]	[Not Applicable]	[Not Available]	[Not Available]	[Not Available]	[Not Available]	[Not Available]	[Not Available]	Cervical Squamous Cell Carcinoma	[Not Available]	[Not Available]
8	14c65927-b9dd-4ef6-9917-db7bc431ff2f	TCGA-C5-A0TN	2011-08-23	NO	YES	-7760	FEMALE	Pre (<6 months since LMP AND no prior bilateral ovariectomy AND not on estrogen replacement)	[Not Available]	55	[Not Available]	BLACK OR AFRICAN AMERICAN	1	NOT HISPANIC OR LATINO	3	No	[Not Available]	WITH TUMOR	[Not Available]	4	Dead	[Not Available]	348	[Not Available]	[Not Available]	[Not Available]	[Not Available]	[Not Available]	[Not Available]	[Not Available]	[Not Available]	1	[Not Available]	[Not Available]	[Not Available]	[Not Available]	[Not Available]	[Not Available]	[Not Available]	[Not Applicable]	[Not Available]	[Not Available]	[Not Available]	[Not Available]	[Not Available]	[Not Available]	Cervical Squamous Cell Carcinoma	[Not Available]	[Not Available]
9	2b6d2c15-8bcc-41ab-84d6-601442f4378b	TCGA-C5-A1BE	2011-09-12	NO	YES	-23727	FEMALE	Post (prior bilateral ovariectomy OR >12 mo since LMP with no prior hysterectomy)	149	76	[Not Available]	WHITE	4	[Not Available]	1	No	0	WITH TUMOR	0	6	Dead	[Not Available]	2094	[Not Available]	[Not Available]	1	[Not Available]	[Not Available]	[Not Available]	[Not Available]	[Not Available]	3	[Not Available]	[Not Available]	[Not Available]	[Not Available]	[Not Available]	[Not Available]	[Not Available]	[Not Applicable]	[Not Available]	[Not Available]	[Not Available]	[Not Available]	[Not Available]	[Not Available]	Cervical Squamous Cell Carcinoma	[Not Available]	[Not Available]
10	262311a0-7a10-4934-8fba-11ee581ad738	TCGA-C5-A1BF	2011-09-12	NO	YES	-16975	FEMALE	[Not Available]	[Not Available]	76	[Not Available]	WHITE	4	[Not Available]	[Not Available]	No	[Not Available]	WITH TUMOR	[Not Available]	5	Dead	[Not Available]	570	[Not Available]	[Not Available]	1	[Not Available]	[Not Available]	[Not Available]	[Not Available]	[Not Available]	2	[Not Available]	30	[Not Available]	[Not Available]	[Not Available]	[Not Available]	[Not Available]	[Not Applicable]	[Not Available]	[Not Available]	[Not Available]	[Not Available]	[Not Available]	[Not Available]	Cervical Squamous Cell Carcinoma	[Not Available]	[Not Available]
11	91310434-2a99-4e1d-81e6-3d58d097089f	TCGA-C5-A1BI	2011-09-12	NO	YES	-11564	FEMALE	Pre (<6 months since LMP AND no prior bilateral ovariectomy AND not on estrogen replacement)	157	59	Former User	WHITE	2	NOT HISPANIC OR LATINO	1	No	0	TUMOR FREE	0	3	Alive	1112	[Not Applicable]	[Not Available]	[Not Available]	0	[Not Available]	[Not Available]	[Not Available]	[Not Available]	16	2	[Not Available]	15	[Not Available]	[Not Available]	[Not Available]	[Not Available]	[Not Available]	[Not Applicable]	[Not Available]	[Not Available]	[Not Available]	[Not Available]	[Not Available]	[Not Available]	Cervical Squamous Cell Carcinoma	[Not Available]	[Not Available]
12	7941d1c7-5319-4e8d-a15f-60b61cb68a9b	TCGA-C5-A1BJ	2011-09-13	NO	YES	-12611	FEMALE	Pre (<6 months since LMP AND no prior bilateral ovariectomy AND not on estrogen replacement)	169	49	[Not Available]	WHITE	0	[Not Available]	0	No	0	TUMOR FREE	0	0	Alive	4385	[Not Applicable]	[Not Available]	[Not Available]	0	[Not Available]	[Not Available]	[Not Available]	[Not Available]	24	4	1997	10	[Not Available]	[Not Available]	[Not Available]	[Not Available]	[Not Available]	[Not Applicable]	[Not Available]	[Not Available]	[Not Available]	[Not Available]	[Not Available]	[Not Available]	Cervical Squamous Cell Carcinoma	[Not Available]	[Not Available]
13	7df6c297-f2d6-43ef-973b-1f95676b0cc4	TCGA-C5-A1BK	2011-08-23	NO	YES	-13297	FEMALE	Pre (<6 months since LMP AND no prior bilateral ovariectomy AND not on estrogen replacement)	151	82	[Not Available]	BLACK OR AFRICAN AMERICAN	4	NOT HISPANIC OR LATINO	0	No	0	TUMOR FREE	0	4	Alive	5385	[Not Applicable]	[Not Available]	[Not Available]	0	[Not Available]	[Not Available]	[Not Available]	[Not Available]	[Not Available]	1	[Not Available]	[Not Available]	[Not Available]	[Not Available]	[Not Available]	[Not Available]	[Not Available]	[Not Applicable]	[Not Available]	[Not Available]	[Not Available]	[Not Available]	[Not Available]	[Not Available]	Cervical Squamous Cell Carcinoma	[Not Available]	[Not Available]
14	03c3fe57-ae85-4e45-9657-c3182ab5e124	TCGA-C5-A1BL	2012-01-24	NO	YES	-11723	FEMALE	Pre (<6 months since LMP AND no prior bilateral ovariectomy AND not on estrogen replacement)	168	78	Never Used	WHITE	1	NOT HISPANIC OR LATINO	0	No	0	TUMOR FREE	0	1	Alive	5271	[Not Applicable]	[Not Available]	[Not Available]	0	[Not Available]	[Not Available]	[Not Available]	[Not Available]	16	4	1988	12	[Not Available]	[Not Available]	1	[Not Available]	Preoperative	[Not Applicable]	[Not Available]	[Not Available]	[Not Available]	[Not Available]	[Not Available]	[Not Available]	Cervical Squamous Cell Carcinoma	[Not Available]	[Not Available]
15	7fb8e7be-4118-41f8-b785-5cbb0afdb8b7	TCGA-C5-A1BM	2011-09-21	NO	YES	-28815	FEMALE	Post (prior bilateral ovariectomy OR >12 mo since LMP with no prior hysterectomy)	171	56	[Not Available]	BLACK OR AFRICAN AMERICAN	2	[Not Available]	0	No	0	TUMOR FREE	0	3	Dead	[Not Available]	2520	[Not Available]	[Not Available]	1	[Not Available]	[Not Available]	[Not Available]	[Not Available]	[Not Available]	4	[Not Available]	[Not Available]	[Not Available]	[Not Available]	[Not Available]	[Not Available]	[Not Available]	[Not Applicable]	[Not Available]	[Not Available]	[Not Available]	[Not Available]	[Not Available]	[Not Available]	Cervical Squamous Cell Carcinoma	[Not Available]	[Not Available]
16	8a4da4f0-30f2-497e-8a7c-988fd6b813cb	TCGA-C5-A1BN	2011-09-21	NO	YES	-9783	FEMALE	Pre (<6 months since LMP AND no prior bilateral ovariectomy AND not on estrogen replacement)	163	68	Never Used	WHITE	2	NOT HISPANIC OR LATINO	0	No	0	WITH TUMOR	0	2	Dead	[Not Available]	166	[Not Available]	[Not Available]	0	[Not Available]	[Not Available]	[Not Available]	[Not Available]	15	2	[Not Available]	11	[Not Available]	[Not Available]	[Not Available]	[Not Available]	[Not Available]	[Not Applicable]	[Not Available]	[Not Available]	[Not Available]	[Not Available]	[Not Available]	[Not Available]	Cervical Squamous Cell Carcinoma	[Not Available]	[Not Available]
17	E77C3F70-08D1-40D3-B038-F09A519423CC	TCGA-C5-A1BQ	2012-08-07	NO	YES	-24018	FEMALE	Post (prior bilateral ovariectomy OR >12 mo since LMP with no prior hysterectomy)	147	69	[Not Available]	WHITE	6	NOT HISPANIC OR LATINO	0	No	0	TUMOR FREE	1	10	Dead	[Not Available]	604	Cervical Cancer	[Not Available]	3	[Not Available]	NO	[Not Available]	YES	12	4	1999	25	[Not Available]	[Not Available]	[Not Available]	[Not Available]	[Not Available]	[Not Applicable]	[Not Available]	[Not Available]	[Not Available]	Partial Remission/Response	[Not Available]	[Not Available]	Cervical Squamous Cell Carcinoma	[Not Available]	[Not Available]
18	0fec73a1-8d3a-495b-8008-c52f190f4270	TCGA-C5-A1M5	2011-09-19	NO	YES	-19672	FEMALE	Indeterminate (neither Pre or Postmenopausal)	[Not Available]	70	[Not Available]	WHITE	4	NOT HISPANIC OR LATINO	0	No	0	WITH TUMOR	0	4	Dead	[Not Available]	2052	[Not Available]	[Not Available]	0	[Not Available]	[Not Available]	[Not Available]	[Not Available]	[Not Available]	1	[Not Available]	[Not Available]	[Not Available]	[Not Available]	[Not Available]	[Not Available]	[Not Available]	[Not Applicable]	[Not Available]	[Not Available]	[Not Available]	[Not Available]	[Not Available]	[Not Available]	Cervical Squamous Cell Carcinoma	[Not Available]	[Not Available]
19	825a6fbb-aede-436f-800b-c7f096da0a77	TCGA-C5-A1M6	2011-09-21	NO	YES	-20090	FEMALE	Post (prior bilateral ovariectomy OR >12 mo since LMP with no prior hysterectomy)	165	77	Former User	WHITE	1	[Not Available]	0	No	0	WITH TUMOR	0	1	Dead	[Not Available]	955	[Not Available]	[Not Available]	0	[Not Available]	[Not Available]	[Not Available]	[Not Available]	[Not Available]	1	[Not Available]	[Not Available]	[Not Available]	[Not Available]	[Not Available]	[Not Available]	[Not Available]	[Not Applicable]	[Not Available]	[Not Available]	[Not Available]	[Not Available]	[Not Available]	[Not Available]	Cervical Squamous Cell Carcinoma	[Not Available]	[Not Available]
20	e8e16aaf-3621-4ce8-b02a-7893dd656e4d	TCGA-C5-A1M7	2012-01-24	NO	YES	-13808	FEMALE	Pre (<6 months since LMP AND no prior bilateral ovariectomy AND not on estrogen replacement)	165	69	Never Used	WHITE	4	NOT HISPANIC OR LATINO	0	No	0	TUMOR FREE	1	5	Alive	1409	[Not Applicable]	[Not Available]	[Not Available]	0	[Not Available]	[Not Available]	[Not Available]	[Not Available]	16	2	[Not Available]	26	[Not Available]	[Not Available]	1	[Not Available]	Preoperative	[Not Applicable]	[Not Available]	[Not Available]	[Not Available]	[Not Available]	[Not Available]	[Not Available]	Cervical Squamous Cell Carcinoma	[Not Available]	[Not Available]
21	110cd100-5730-4873-9fab-2ae6c8732062	TCGA-C5-A1M8	2011-09-19	NO	YES	-15848	FEMALE	Indeterminate (neither Pre or Postmenopausal)	163	75	Never Used	WHITE	0	NOT HISPANIC OR LATINO	1	No	0	TUMOR FREE	0	1	Alive	919	[Not Applicable]	[Not Available]	[Not Available]	0	[Not Available]	[Not Available]	[Not Available]	[Not Available]	[Not Available]	1	[Not Available]	[Not Available]	[Not Available]	[Not Available]	[Not Available]	[Not Available]	[Not Available]	[Not Applicable]	[Not Available]	[Not Available]	[Not Available]	[Not Available]	[Not Available]	[Not Available]	Cervical Squamous Cell Carcinoma	[Not Available]	[Not Available]
22	a3be445a-a592-4073-815b-47ae41f9c4a0	TCGA-C5-A1M9	2011-09-19	NO	YES	-17020	FEMALE	Pre (<6 months since LMP AND no prior bilateral ovariectomy AND not on estrogen replacement)	155	49	Former User	WHITE	0	NOT HISPANIC OR LATINO	1	No	0	WITH TUMOR	0	1	Dead	[Not Available]	1065	[Not Available]	[Not Available]	0	[Not Available]	[Not Available]	[Not Available]	[Not Available]	[Not Available]	1	[Not Available]	[Not Available]	[Not Available]	[Not Available]	[Not Available]	[Not Available]	[Not Available]	[Not Applicable]	[Not Available]	[Not Available]	[Not Available]	[Not Available]	[Not Available]	[Not Available]	Endocervical Type of Adenocarcinoma	[Not Available]	[Not Available]
23	a0598331-79e1-418d-b50c-fd945b843506	TCGA-C5-A1ME	2011-09-19	NO	YES	-14970	FEMALE	Pre (<6 months since LMP AND no prior bilateral ovariectomy AND not on estrogen replacement)	165	69	Former User	WHITE	1	NOT HISPANIC OR LATINO	0	No	0	TUMOR FREE	0	1	Alive	132	[Not Applicable]	[Not Available]	[Not Available]	0	[Not Available]	[Not Available]	[Not Available]	[Not Available]	18	4	2003	22	[Not Available]	[Not Available]	[Not Available]	[Not Available]	[Not Available]	[Not Applicable]	[Not Available]	[Not Available]	[Not Available]	[Not Available]	[Not Available]	[Not Available]	Endocervical Type of Adenocarcinoma	[Not Available]	[Not Available]
24	4f514ed4-3be6-44bc-a531-210027846459	TCGA-C5-A1MF	2012-01-25	NO	YES	-17911	FEMALE	Pre (<6 months since LMP AND no prior bilateral ovariectomy AND not on estrogen replacement)	163	70	Former User	WHITE	2	NOT HISPANIC OR LATINO	0	No	0	TUMOR FREE	0	2	Alive	1617	[Not Applicable]	[Not Available]	[Not Available]	0	[Not Available]	[Not Available]	[Not Available]	[Not Available]	20	4	1995	10	[Not Available]	[Not Available]	1	[Not Available]	Preoperative	[Not Applicable]	[Not Available]	[Not Available]	[Not Available]	[Not Available]	[Not Available]	[Not Available]	Cervical Squamous Cell Carcinoma	[Not Available]	[Not Available]
25	3143822c-66c4-4b58-8d29-e92d065ff049	TCGA-C5-A1MH	2011-09-19	NO	YES	-26234	FEMALE	Post (prior bilateral ovariectomy OR >12 mo since LMP with no prior hysterectomy)	[Not Available]	[Not Available]	[Not Available]	WHITE	2	NOT HISPANIC OR LATINO	0	No	0	WITH TUMOR	0	2	Dead	[Not Available]	1186	[Not Available]	[Not Available]	0	[Not Available]	[Not Available]	[Not Available]	[Not Available]	[Not Available]	3	2003	15	[Not Available]	[Not Available]	[Not Available]	[Not Available]	[Not Available]	[Not Applicable]	[Not Available]	[Not Available]	[Not Available]	[Not Available]	[Not Available]	[Not Available]	Cervical Squamous Cell Carcinoma	[Not Available]	[Not Available]
26	941f75a1-fea4-4539-ba69-60bb11608f6d	TCGA-C5-A1MI	2011-09-19	NO	YES	-18336	FEMALE	Peri (6-12 months since last menstrual period)	[Not Available]	77	[Not Available]	WHITE	2	NOT HISPANIC OR LATINO	2	No	1	WITH TUMOR	0	7	Dead	[Not Available]	1083	[Not Available]	[Not Available]	2	[Not Available]	[Not Available]	[Not Available]	[Not Available]	15	2	[Not Available]	35	Other, specify	Herpes	[Not Available]	[Not Available]	[Not Available]	[Not Applicable]	[Not Available]	[Not Available]	[Not Available]	[Not Available]	[Not Available]	[Not Available]	Cervical Squamous Cell Carcinoma	[Not Available]	[Not Available]
27	23f011e2-c025-4494-8016-2140cc8d4bce	TCGA-C5-A1MJ	2011-09-21	NO	YES	-22308	FEMALE	Post (prior bilateral ovariectomy OR >12 mo since LMP with no prior hysterectomy)	165	75	[Not Available]	WHITE	3	[Not Available]	2	No	1	TUMOR FREE	0	6	Dead	[Not Available]	14	[Not Available]	[Not Available]	0	[Not Available]	[Not Available]	[Not Available]	[Not Available]	[Not Available]	1	[Not Available]	[Not Available]	[Not Available]	[Not Available]	[Not Available]	[Not Available]	[Not Available]	[Not Applicable]	[Not Available]	[Not Available]	[Not Available]	[Not Available]	[Not Available]	[Not Available]	Endocervical Type of Adenocarcinoma	[Not Available]	[Not Available]
28	b726f18b-b996-4978-9f27-b3a540e06270	TCGA-C5-A1MK	2011-10-21	NO	YES	-28939	FEMALE	Post (prior bilateral ovariectomy OR >12 mo since LMP with no prior hysterectomy)	155	63	[Not Available]	WHITE	2	NOT HISPANIC OR LATINO	2	No	0	WITH TUMOR	1	5	Dead	[Not Available]	74	[Not Available]	[Not Available]	0	[Not Available]	[Not Available]	[Not Available]	[Not Available]	[Not Available]	1	[Not Available]	[Not Available]	[Not Available]	[Not Available]	[Not Available]	[Not Available]	[Not Available]	[Not Applicable]	[Not Available]	[Not Available]	[Not Available]	[Not Available]	[Not Available]	[Not Available]	Cervical Squamous Cell Carcinoma	[Not Available]	[Not Available]
29	374f614a-bcd1-4283-ac6f-fc27ddc79987	TCGA-C5-A1ML	2011-10-21	NO	YES	-18067	FEMALE	Post (prior bilateral ovariectomy OR >12 mo since LMP with no prior hysterectomy)	[Not Available]	120	[Not Available]	WHITE	2	[Not Available]	0	No	0	WITH TUMOR	0	2	Dead	[Not Available]	636	[Not Available]	[Not Available]	0	[Not Available]	[Not Available]	[Not Available]	[Not Available]	[Not Available]	2	[Not Available]	37	[Not Available]	[Not Available]	[Not Available]	[Not Available]	[Not Available]	[Not Applicable]	[Not Available]	[Not Available]	[Not Available]	[Not Available]	[Not Available]	[Not Available]	Cervical Squamous Cell Carcinoma	[Not Available]	[Not Available]
30	287ce10e-31c8-4b10-9858-6e45451dfbe4	TCGA-C5-A1MN	2011-10-21	NO	YES	-15499	FEMALE	Pre (<6 months since LMP AND no prior bilateral ovariectomy AND not on estrogen replacement)	165	64	Former User	WHITE	0	NOT HISPANIC OR LATINO	0	No	0	TUMOR FREE	0	0	Dead	[Not Available]	1245	[Not Available]	[Not Available]	0	[Not Available]	[Not Available]	[Not Available]	[Not Available]	[Not Available]	2	[Not Available]	25	[Not Available]	[Not Available]	1	[Not Available]	Post-Adjuvant Therapy	[Not Applicable]	[Not Available]	[Not Available]	[Not Available]	[Not Available]	[Not Available]	[Not Available]	Cervical Squamous Cell Carcinoma	[Not Available]	[Not Available]
31	08a52bcf-d2e9-497b-938a-4660c332e914	TCGA-C5-A1MP	2011-10-21	NO	YES	-12692	FEMALE	Pre (<6 months since LMP AND no prior bilateral ovariectomy AND not on estrogen replacement)	[Not Available]	[Not Available]	[Not Available]	BLACK OR AFRICAN AMERICAN	3	NOT HISPANIC OR LATINO	0	No	0	TUMOR FREE	0	3	Alive	109	[Not Applicable]	[Not Available]	[Not Available]	0	[Not Available]	[Not Available]	[Not Available]	[Not Available]	[Not Available]	1	[Not Available]	[Not Available]	[Not Available]	[Not Available]	[Not Available]	[Not Available]	[Not Available]	[Not Applicable]	[Not Available]	[Not Available]	[Not Available]	[Not Available]	[Not Available]	[Not Available]	Cervical Squamous Cell Carcinoma	[Not Available]	[Not Available]
32	eb59cf69-1997-41b9-bf69-69ad7da292a1	TCGA-C5-A1MQ	2011-10-21	NO	YES	-12836	FEMALE	[Not Available]	175	116	[Not Available]	WHITE	2	NOT HISPANIC OR LATINO	0	No	0	TUMOR FREE	0	4	Alive	17	[Not Applicable]	[Not Available]	[Not Available]	2	[Not Available]	[Not Available]	[Not Available]	[Not Available]	[Not Available]	1	[Not Available]	[Not Available]	[Not Available]	[Not Available]	[Not Available]	[Not Available]	[Not Available]	[Not Applicable]	[Not Available]	[Not Available]	[Not Available]	[Not Available]	[Not Available]	[Not Available]	Cervical Squamous Cell Carcinoma	[Not Available]	[Not Available]
33	185E1520-92EE-4AF5-AF15-FBEEFB352C99	TCGA-C5-A2LS	2014-01-03	NO	YES	-13857	FEMALE	[Not Available]	173	92	[Not Available]	WHITE	2	NOT HISPANIC OR LATINO	0	No	0	TUMOR FREE	0	3	Alive	1345	[Not Applicable]	[Not Available]	[Not Available]	1	[Not Available]	NO	[Not Available]	NO	17	2	[Not Available]	11	[Not Available]	[Not Available]	[Not Available]	[Not Available]	[Not Available]	[Not Applicable]	[Not Available]	[Not Available]	[Not Available]	Complete Remission/Response	[Not Available]	[Not Available]	Endocervical Adenocarcinoma of the Usual Type	[Not Available]	[Not Available]
34	FB66B7F5-22CA-4D4D-97C2-30E6EDFFF781	TCGA-C5-A2LT	2012-01-24	NO	YES	-13966	FEMALE	Pre (<6 months since LMP AND no prior bilateral ovariectomy AND not on estrogen replacement)	163	59	Current User	WHITE	2	NOT HISPANIC OR LATINO	0	No	0	TUMOR FREE	0	2	Alive	2226	[Not Applicable]	[Not Available]	[Not Available]	0	[Not Available]	[Not Available]	[Not Available]	[Not Available]	20	2	[Not Available]	19	[Not Available]	[Not Available]	1	[Not Available]	Preoperative	[Not Applicable]	[Not Available]	[Not Available]	[Not Available]	[Not Available]	[Not Available]	[Not Available]	Cervical Squamous Cell Carcinoma	[Not Available]	[Not Available]
35	00BCA18C-B3D4-45A3-8F19-034CC40449A4	TCGA-C5-A2LV	2012-02-08	NO	YES	-13447	FEMALE	Pre (<6 months since LMP AND no prior bilateral ovariectomy AND not on estrogen replacement)	165	84	Never Used	BLACK OR AFRICAN AMERICAN	3	NOT HISPANIC OR LATINO	2	No	0	TUMOR FREE	0	6	Alive	2234	[Not Applicable]	[Not Available]	[Not Available]	1	[Not Available]	[Not Available]	[Not Available]	[Not Available]	20	2	[Not Available]	16	[Not Available]	[Not Available]	1	[Not Available]	Preoperative	[Not Applicable]	[Not Available]	[Not Available]	[Not Available]	[Not Available]	[Not Available]	[Not Available]	Cervical Squamous Cell Carcinoma	[Not Available]	[Not Available]
36	B82F4C6D-530F-4B0E-8F33-995633CB254A	TCGA-C5-A2LX	2012-02-08	NO	YES	-20070	FEMALE	Post (prior bilateral ovariectomy OR >12 mo since LMP with no prior hysterectomy)	165	65	Former User	WHITE	4	NOT HISPANIC OR LATINO	0	No	0	TUMOR FREE	0	4	Alive	491	[Not Applicable]	[Not Available]	[Not Available]	0	[Not Available]	[Not Available]	[Not Available]	[Not Available]	18	2	[Not Available]	35	[Not Available]	[Not Available]	1	[Not Available]	Pre-Adjuvant Therapy	[Not Applicable]	[Not Available]	[Not Available]	[Not Available]	[Not Available]	[Not Available]	[Not Available]	Cervical Squamous Cell Carcinoma	[Not Available]	[Not Available]
37	E733F289-A0EC-478C-AAD9-1378AD26DDFA	TCGA-C5-A2LY	2012-01-25	NO	YES	-11018	FEMALE	Pre (<6 months since LMP AND no prior bilateral ovariectomy AND not on estrogen replacement)	160	88	Former User	WHITE	1	NOT HISPANIC OR LATINO	0	No	0	TUMOR FREE	0	1	Alive	2383	[Not Applicable]	[Not Available]	[Not Available]	0	[Not Available]	[Not Available]	[Not Available]	[Not Available]	[Not Available]	1	[Not Available]	[Not Available]	[Not Available]	[Not Available]	1	[Not Available]	Preoperative	[Not Applicable]	[Not Available]	[Not Available]	[Not Available]	[Not Available]	[Not Available]	[Not Available]	Cervical Squamous Cell Carcinoma	[Not Available]	[Not Available]
38	BE8FA67D-C2D3-4FFF-82FE-A46BA1FA8DF0	TCGA-C5-A2LZ	2012-07-10	NO	YES	-24059	FEMALE	Post (prior bilateral ovariectomy OR >12 mo since LMP with no prior hysterectomy)	163	85	[Unknown]	WHITE	4	NOT HISPANIC OR LATINO	0	No	0	WITH TUMOR	0	5	Dead	[Not Available]	3046	Cervical Cancer	[Not Available]	1	[Not Available]	NO	[Not Available]	YES	15	2	[Not Available]	50	[Not Available]	[Not Available]	[Not Available]	[Not Available]	[Not Available]	[Not Applicable]	[Not Available]	[Not Available]	[Not Available]	Complete Remission/Response	[Not Available]	[Not Available]	Cervical Squamous Cell Carcinoma	[Not Available]	[Not Available]
39	8911C80C-C903-48E4-AF5B-FFEDEF9ABC47	TCGA-C5-A2M1	2012-02-08	NO	YES	-13835	FEMALE	Pre (<6 months since LMP AND no prior bilateral ovariectomy AND not on estrogen replacement)	168	76	Former User	WHITE	2	NOT HISPANIC OR LATINO	0	No	0	TUMOR FREE	0	2	Alive	1169	[Not Applicable]	[Not Available]	[Not Available]	0	[Not Available]	[Not Available]	[Not Available]	[Not Available]	[Not Available]	1	[Not Available]	[Not Available]	[Not Available]	[Not Available]	1	[Not Available]	Preoperative	[Not Applicable]	[Not Available]	[Not Available]	[Not Available]	[Not Available]	[Not Available]	[Not Available]	Endocervical Type of Adenocarcinoma	[Not Available]	[Not Available]
40	77D53D4D-3B07-4C79-86FE-6AC812968F39	TCGA-C5-A2M2	2012-04-04	NO	YES	-20480	FEMALE	Post (prior bilateral ovariectomy OR >12 mo since LMP with no prior hysterectomy)	[Not Available]	[Not Available]	Former User	WHITE	1	NOT HISPANIC OR LATINO	0	No	0	[Not Available]	0	1	Alive	25	[Not Applicable]	[Not Available]	[Not Available]	0	[Not Available]	[Not Available]	[Not Available]	[Not Available]	24	4	2003	8	[Not Available]	[Not Available]	[Not Available]	[Not Available]	[Not Available]	[Not Applicable]	[Not Available]	[Not Available]	[Not Available]	[Not Available]	[Not Available]	[Not Available]	Endocervical Type of Adenocarcinoma	[Not Available]	[Not Available]
41	12427B02-6E3F-461C-B271-6AB230F628E7	TCGA-C5-A3HD	2012-04-17	NO	YES	-18690	FEMALE	[Not Available]	170	83	Former User	WHITE	2	NOT HISPANIC OR LATINO	0	No	0	TUMOR FREE	0	2	Alive	1582	[Not Applicable]	[Not Available]	[Not Available]	0	[Not Available]	[Not Available]	[Not Available]	[Not Available]	16	4	1995	27	[Not Available]	[Not Available]	1	[Not Available]	Preoperative	[Not Applicable]	[Not Available]	[Not Available]	[Not Available]	[Not Available]	[Not Available]	[Not Available]	Cervical Squamous Cell Carcinoma	[Not Available]	[Not Available]
42	BC63DD2A-B8F6-4B30-A8D7-CE193BCD17F1	TCGA-C5-A3HE	2014-01-03	NO	YES	-16139	FEMALE	[Not Available]	[Not Available]	[Not Available]	[Not Available]	WHITE	0	NOT HISPANIC OR LATINO	1	No	0	[Unknown]	0	1	Alive	548	[Not Applicable]	[Not Available]	[Not Available]	0	[Not Available]	[Not Available]	[Not Available]	YES	[Not Available]	1	[Not Available]	[Not Available]	[Not Available]	[Not Available]	[Not Available]	[Not Available]	[Not Available]	[Not Applicable]	[Not Available]	[Not Available]	[Not Available]	[Not Available]	[Not Available]	[Not Available]	Cervical Squamous Cell Carcinoma	[Not Available]	[Not Available]
43	085DF27C-9BC2-425A-9A49-547D692EA028	TCGA-C5-A3HF	2012-04-16	NO	YES	-9115	FEMALE	Pre (<6 months since LMP AND no prior bilateral ovariectomy AND not on estrogen replacement)	[Not Available]	[Not Available]	[Not Available]	WHITE	1	NOT HISPANIC OR LATINO	0	No	0	WITH TUMOR	0	1	Dead	[Not Available]	543	[Not Available]	[Not Available]	0	[Not Available]	[Not Available]	[Not Available]	[Not Available]	16	2	[Not Available]	9	[Not Available]	[Not Available]	[Not Available]	[Not Available]	[Not Available]	[Not Applicable]	[Not Available]	[Not Available]	[Not Available]	[Not Available]	[Not Available]	[Not Available]	Mucinous Adenocarcinoma of Endocervical Type	[Not Available]	[Not Available]
44	09329A53-D58D-4480-95D8-32043E40DE6E	TCGA-C5-A3HL	2012-04-17	NO	YES	-27963	FEMALE	Post (prior bilateral ovariectomy OR >12 mo since LMP with no prior hysterectomy)	[Not Available]	[Not Available]	Never Used	WHITE	4	NOT HISPANIC OR LATINO	1	No	0	TUMOR FREE	0	5	Alive	621	[Not Applicable]	[Not Available]	[Not Available]	0	[Not Available]	[Not Available]	[Not Available]	[Not Available]	[Not Available]	1	[Not Available]	[Not Available]	[Not Available]	[Not Available]	[Not Available]	[Not Available]	[Not Available]	[Not Applicable]	[Not Available]	[Not Available]	[Not Available]	[Not Available]	[Not Available]	[Not Available]	Cervical Squamous Cell Carcinoma	[Not Available]	[Not Available]
45	F2C901D1-2039-4046-89B5-C2D45BCF10C3	TCGA-C5-A7CG	2014-01-03	NO	YES	-20242	FEMALE	[Not Available]	169	94	Never Used	WHITE	5	NOT HISPANIC OR LATINO	0	No	0	TUMOR FREE	1	6	Alive	5564	[Not Applicable]	[Not Available]	[Not Available]	0	[Not Available]	[Not Available]	[Not Available]	NO	[Not Available]	1	[Not Available]	[Not Available]	[Not Available]	[Not Available]	[Not Available]	[Not Available]	[Not Available]	[Not Applicable]	[Not Available]	[Not Available]	[Not Available]	[Not Available]	[Not Available]	[Not Available]	Cervical Squamous Cell Carcinoma	[Not Available]	[Not Available]
46	D626A732-AF64-4DEC-B4BF-3CB761BF4C8D	TCGA-C5-A7CH	2014-01-03	NO	YES	-15777	FEMALE	[Not Available]	161	104	[Not Available]	WHITE	8	NOT HISPANIC OR LATINO	1	No	0	[Unknown]	0	9	Alive	771	[Not Applicable]	[Not Available]	[Not Available]	0	[Not Available]	[Not Available]	[Not Available]	YES	[Not Available]	1	[Not Available]	[Not Available]	[Not Available]	[Not Available]	[Not Available]	[Not Available]	[Not Available]	[Not Applicable]	[Not Available]	[Not Available]	[Not Available]	[Not Available]	[Not Available]	[Not Available]	Cervical Squamous Cell Carcinoma	[Not Available]	[Not Available]
47	F8F470D2-924F-41DD-92C5-516B0BF68E44	TCGA-C5-A7CJ	2014-01-03	NO	YES	-15652	FEMALE	[Not Available]	163	60	[Not Available]	WHITE	2	NOT HISPANIC OR LATINO	0	No	0	TUMOR FREE	0	2	Dead	[Not Available]	3097	[Unknown]	[Not Available]	0	[Not Available]	[Not Available]	[Not Available]	YES	22	2	[Not Available]	30	[Not Available]	[Not Available]	[Not Available]	[Not Available]	[Not Available]	[Not Applicable]	[Not Available]	[Not Available]	[Not Available]	[Not Available]	[Not Available]	[Not Available]	Cervical Squamous Cell Carcinoma	[Not Available]	[Not Available]
48	1C48393E-7DE9-42F6-A6F0-2CBFB8359316	TCGA-C5-A7CK	2014-01-03	NO	YES	-21520	FEMALE	[Not Available]	165	55	[Not Available]	WHITE	3	[Not Evaluated]	0	No	0	TUMOR FREE	0	3	Dead	[Not Available]	4086	[Unknown]	[Not Available]	0	[Not Available]	[Not Available]	[Not Available]	YES	[Not Available]	5	[Not Available]	40	[Not Available]	[Not Available]	[Not Available]	[Not Available]	[Not Available]	[Not Applicable]	[Not Available]	[Not Available]	[Not Available]	[Not Available]	[Not Available]	[Not Available]	Cervical Squamous Cell Carcinoma	[Not Available]	[Not Available]
49	BAE2AF5E-484A-44F7-AD6B-66137CDAE300	TCGA-C5-A7CL	2014-01-03	NO	YES	-17869	FEMALE	[Not Available]	163	103	[Not Available]	WHITE	3	[Not Evaluated]	0	No	0	WITH TUMOR	0	3	Dead	[Not Available]	471	Cervical Cancer	[Not Available]	0	[Not Available]	[Not Available]	[Not Available]	YES	29	2	[Not Available]	20	[Not Available]	[Not Available]	[Not Available]	[Not Available]	[Not Available]	[Not Applicable]	[Not Available]	[Not Available]	[Not Available]	[Not Available]	[Not Available]	[Not Available]	Cervical Squamous Cell Carcinoma	[Not Available]	[Not Available]
50	D223FF09-B80B-4368-9D80-A59DFBE4D820	TCGA-C5-A7CM	2014-01-03	NO	YES	-12853	FEMALE	[Not Available]	168	75	[Not Available]	WHITE	[Not Available]	HISPANIC OR LATINO	[Not Available]	No	[Not Available]	TUMOR FREE	[Not Available]	[Not Available]	Alive	294	[Not Applicable]	[Not Available]	[Not Available]	[Not Available]	[Not Available]	[Not Available]	[Not Available]	YES	[Not Available]	4	1997	[Not Available]	[Not Available]	[Not Available]	0	[Not Available]	Post-Adjuvant Therapy	[Not Applicable]	[Not Available]	[Not Available]	[Not Available]	Complete Remission/Response	[Not Available]	[Not Available]	Endocervical Adenocarcinoma of the Usual Type	[Not Available]	[Not Available]
51	FF3808E4-EECE-4046-819B-FE1019317F8E	TCGA-C5-A7CO	2014-01-03	NO	YES	-25045	FEMALE	Post (prior bilateral ovariectomy OR >12 mo since LMP with no prior hysterectomy)	158	98	[Not Available]	WHITE	5	NOT HISPANIC OR LATINO	0	No	0	TUMOR FREE	0	5	Alive	2233	[Not Applicable]	[Not Available]	[Not Available]	0	[Not Available]	[Not Available]	[Not Available]	YES	20	3	1972	38	[Not Available]	[Not Available]	[Not Available]	[Not Available]	[Not Available]	[Not Applicable]	[Not Available]	[Not Available]	[Not Available]	[Not Available]	[Not Available]	[Not Available]	Cervical Squamous Cell Carcinoma	[Not Available]	[Not Available]
52	5C326E9B-85E2-4673-9033-C11827467E1A	TCGA-C5-A7UC	2014-01-03	NO	YES	-17765	FEMALE	[Not Available]	[Not Available]	[Not Available]	[Not Available]	WHITE	[Not Available]	[Not Evaluated]	[Not Available]	No	[Not Available]	TUMOR FREE	[Not Available]	[Not Available]	Dead	[Not Available]	523	[Unknown]	[Not Available]	[Not Available]	[Not Available]	[Not Available]	[Not Available]	NO	[Not Available]	[Not Available]	[Not Available]	[Not Available]	[Not Available]	[Not Available]	[Not Available]	[Not Available]	[Not Available]	[Not Applicable]	[Not Available]	[Not Available]	[Not Available]	[Not Available]	[Not Available]	[Not Available]	Cervical Squamous Cell Carcinoma	[Not Available]	[Not Available]
53	DA30A845-C4D3-4C78-B8B0-210239224F8F	TCGA-C5-A7UE	2014-01-03	NO	YES	-16473	FEMALE	[Not Available]	160	63	[Not Available]	WHITE	3	[Not Evaluated]	1	No	0	TUMOR FREE	0	4	Alive	2602	[Not Applicable]	[Not Available]	[Not Available]	0	[Not Available]	[Not Available]	[Not Available]	YES	17	2	[Not Available]	35	[Not Available]	[Not Available]	[Not Available]	[Not Available]	[Not Available]	[Not Applicable]	[Not Available]	[Not Available]	[Not Available]	[Not Available]	[Not Available]	[Not Available]	Cervical Squamous Cell Carcinoma	[Not Available]	[Not Available]
54	8328925E-3324-4188-85F1-6FFBF819D9E7	TCGA-C5-A7UH	2014-01-03	NO	YES	-20189	FEMALE	[Not Available]	163	56	Former User	WHITE	2	NOT HISPANIC OR LATINO	0	No	0	TUMOR FREE	0	2	Alive	1846	[Not Applicable]	[Not Available]	[Not Available]	0	[Not Available]	[Not Available]	[Not Available]	YES	[Not Available]	1	[Not Available]	[Not Available]	[Not Available]	[Not Available]	[Not Available]	[Not Available]	[Not Available]	[Not Applicable]	[Not Available]	[Not Available]	[Not Available]	[Not Available]	[Not Available]	[Not Available]	Cervical Squamous Cell Carcinoma	[Not Available]	[Not Available]
55	CE5765FB-5221-4CBF-AA76-BB863803DF57	TCGA-C5-A7UI	2014-04-01	NO	YES	-15349	FEMALE	[Not Available]	[Not Available]	86	[Not Available]	BLACK OR AFRICAN AMERICAN	3	NOT HISPANIC OR LATINO	[Not Available]	No	[Not Available]	TUMOR FREE	[Not Available]	4	Dead	[Not Available]	2888	[Not Available]	[Not Available]	1	[Not Available]	NO	[Not Available]	NO	[Not Available]	2	[Not Available]	12	[Not Available]	[Not Available]	[Not Available]	[Not Available]	[Not Available]	[Not Applicable]	[Not Available]	[Not Available]	[Not Available]	[Not Available]	[Not Available]	[Not Available]	Cervical Squamous Cell Carcinoma	[Not Available]	[Not Available]
56	4ED1616E-8C62-4104-BCBE-26D7059F04D0	TCGA-C5-A7X3	2014-01-03	NO	YES	-25665	FEMALE	[Not Available]	160	79	Never Used	WHITE	7	NOT HISPANIC OR LATINO	0	No	0	TUMOR FREE	0	7	Dead	[Not Available]	284	[Unknown]	[Not Available]	0	[Not Available]	[Not Available]	[Not Available]	YES	[Not Available]	1	[Not Available]	[Not Available]	[Not Available]	[Not Available]	[Not Available]	[Not Available]	[Not Available]	[Not Applicable]	[Not Available]	[Not Available]	[Not Available]	[Not Available]	[Not Available]	[Not Available]	Cervical Squamous Cell Carcinoma	[Not Available]	[Not Available]
57	AED93A3A-7DCB-4BA9-84C0-BC735CBD545F	TCGA-C5-A7X5	2014-01-03	NO	YES	-26542	FEMALE	[Not Available]	163	59	[Not Available]	BLACK OR AFRICAN AMERICAN	[Not Available]	NOT HISPANIC OR LATINO	[Not Available]	No	[Not Available]	WITH TUMOR	[Not Available]	[Not Available]	Dead	[Not Available]	414	Cervical Cancer	[Not Available]	[Not Available]	[Not Available]	[Not Available]	[Not Available]	YES	[Not Available]	[Not Available]	[Not Available]	[Not Available]	[Not Available]	[Not Available]	[Not Available]	[Not Available]	[Not Available]	[Not Applicable]	[Not Available]	[Not Available]	[Not Available]	[Not Available]	[Not Available]	[Not Available]	Cervical Squamous Cell Carcinoma	[Not Available]	[Not Available]
58	57902B91-BE42-441D-8807-A5EA9C21B214	TCGA-C5-A7X8	2014-01-03	NO	YES	-12977	FEMALE	[Not Available]	170	74	[Not Available]	WHITE	2	NOT HISPANIC OR LATINO	0	No	0	TUMOR FREE	0	3	Alive	83	[Not Applicable]	[Not Available]	[Not Available]	1	[Not Available]	[Not Available]	[Not Available]	YES	25	2	[Not Available]	5	[Not Available]	[Not Available]	[Not Available]	[Not Available]	[Not Available]	[Not Applicable]	[Not Available]	[Not Available]	[Not Available]	[Not Available]	[Not Available]	[Not Available]	Mucinous Adenocarcinoma of Endocervical Type	[Not Available]	[Not Available]
59	DEDFD5FB-3C72-40F9-A7EF-52C2176BF662	TCGA-C5-A7XC	2014-05-07	NO	YES	-9776	FEMALE	[Not Available]	[Not Available]	53	[Not Available]	WHITE	1	NOT HISPANIC OR LATINO	[Not Available]	No	[Not Available]	TUMOR FREE	[Not Available]	1	Alive	1551	[Not Applicable]	[Not Available]	[Not Available]	[Not Available]	[Not Available]	NO	[Not Available]	NO	[Not Available]	2	[Not Available]	5	[Not Available]	[Not Available]	[Not Available]	[Not Available]	[Not Available]	[Not Applicable]	[Not Available]	[Not Available]	[Not Available]	[Not Available]	[Not Available]	[Not Available]	Cervical Squamous Cell Carcinoma	[Not Available]	[Not Available]
60	183E8D87-3476-46BC-A989-ED4B09809227	TCGA-C5-A8XH	2014-04-17	NO	YES	-14444	FEMALE	[Not Available]	163	60	[Not Available]	WHITE	2	NOT HISPANIC OR LATINO	[Not Available]	No	[Not Available]	TUMOR FREE	[Not Available]	2	Dead	[Not Available]	1394	[Unknown]	[Not Available]	[Not Available]	[Not Available]	NO	[Not Available]	NO	[Not Available]	4	2007	20	[Not Available]	[Not Available]	[Not Available]	[Not Available]	[Not Available]	[Not Applicable]	[Not Available]	[Not Available]	[Not Available]	[Not Available]	[Not Available]	[Not Available]	Cervical Squamous Cell Carcinoma	[Not Available]	[Not Available]
61	959FE574-054A-4FEF-9CBE-A801A9A355DE	TCGA-C5-A8XI	2014-04-17	NO	YES	-25220	FEMALE	Post (prior bilateral ovariectomy OR >12 mo since LMP with no prior hysterectomy)	[Not Available]	[Not Available]	[Not Available]	BLACK OR AFRICAN AMERICAN	4	[Not Evaluated]	[Not Available]	No	[Not Available]	TUMOR FREE	[Not Available]	5	Alive	254	[Not Applicable]	[Not Available]	[Not Available]	1	[Not Available]	[Not Available]	[Not Available]	YES	29	2	[Not Available]	57	[Not Available]	[Not Available]	[Not Available]	[Not Available]	[Not Available]	[Not Applicable]	[Not Available]	[Not Available]	[Not Available]	[Not Available]	[Not Available]	[Not Available]	Cervical Squamous Cell Carcinoma	[Not Available]	[Not Available]
62	E89D0CB1-6EC2-43EE-A6D9-B922B680AF34	TCGA-C5-A8XJ	2014-04-17	NO	YES	-27087	FEMALE	[Not Available]	160	114	[Not Available]	WHITE	4	NOT HISPANIC OR LATINO	[Not Available]	No	[Not Available]	TUMOR FREE	[Not Available]	4	Alive	2305	[Not Applicable]	[Not Available]	[Not Available]	[Not Available]	[Not Available]	[Not Available]	[Not Available]	YES	[Not Available]	1	[Not Available]	[Not Available]	[Not Available]	[Not Available]	[Not Available]	[Not Available]	[Not Available]	[Not Applicable]	[Not Available]	[Not Available]	[Not Available]	[Not Available]	[Not Available]	[Not Available]	Cervical Squamous Cell Carcinoma	[Not Available]	[Not Available]
63	8AC819B3-4227-4EAE-BE03-8760B197DF9A	TCGA-C5-A8XK	2014-04-01	NO	YES	-11268	FEMALE	[Not Available]	[Not Available]	[Not Available]	[Not Available]	BLACK OR AFRICAN AMERICAN	[Not Available]	[Not Evaluated]	[Not Available]	No	[Not Available]	TUMOR FREE	[Not Available]	[Not Available]	Alive	3039	[Not Applicable]	[Not Available]	[Not Available]	[Not Available]	[Not Available]	[Not Available]	[Not Available]	YES	[Not Available]	[Not Available]	[Not Available]	[Not Available]	[Not Available]	[Not Available]	[Not Available]	[Not Available]	[Not Available]	[Not Applicable]	[Not Available]	[Not Available]	[Not Available]	[Not Available]	[Not Available]	[Not Available]	Cervical Squamous Cell Carcinoma	[Not Available]	[Not Available]
64	DE3CFB81-25C3-4137-8F24-AD8AA607C158	TCGA-C5-A8YQ	2014-04-17	NO	YES	-28873	FEMALE	Post (prior bilateral ovariectomy OR >12 mo since LMP with no prior hysterectomy)	165	70	[Not Available]	WHITE	1	NOT HISPANIC OR LATINO	[Not Available]	No	[Not Available]	WITH TUMOR	[Not Available]	2	Dead	[Not Available]	715	Cervical Cancer	[Not Available]	[Not Available]	[Not Available]	[Not Available]	[Not Available]	YES	23	2	[Not Available]	56	[Not Available]	[Not Available]	[Not Available]	[Not Available]	[Not Available]	[Not Applicable]	[Not Available]	[Not Available]	[Not Available]	[Not Available]	[Not Available]	[Not Available]	Cervical Squamous Cell Carcinoma	[Not Available]	[Not Available]
65	BE8B1C78-8CB1-4BFF-B1FE-71ECDC454C94	TCGA-C5-A8YR	2014-04-01	NO	YES	-20672	FEMALE	[Not Available]	[Not Available]	80	[Not Available]	WHITE	4	NOT HISPANIC OR LATINO	[Not Available]	No	[Not Available]	[Unknown]	[Not Available]	6	Dead	[Not Available]	837	[Unknown]	[Not Available]	2	[Not Available]	NO	[Not Available]	NO	[Not Available]	1	[Not Available]	[Not Available]	[Not Available]	[Not Available]	[Not Available]	[Not Available]	[Not Available]	[Not Applicable]	[Not Available]	[Not Available]	[Not Available]	[Not Available]	[Not Available]	[Not Available]	Cervical Squamous Cell Carcinoma	[Not Available]	[Not Available]
66	CECAECB4-51EF-407D-A882-0E4B444B0A77	TCGA-C5-A8YT	2014-04-17	NO	YES	-13253	FEMALE	[Not Available]	[Not Available]	[Not Available]	Never Used	WHITE	3	NOT HISPANIC OR LATINO	[Not Available]	No	[Not Available]	WITH TUMOR	[Not Available]	3	Alive	186	[Not Applicable]	[Not Available]	[Not Available]	[Not Available]	[Not Available]	[Not Available]	[Not Available]	YES	16	2	[Not Available]	20	[Not Available]	[Not Available]	[Not Available]	[Not Available]	[Not Available]	[Not Applicable]	[Not Available]	[Not Available]	[Not Available]	[Not Available]	[Not Available]	[Not Available]	Cervical Squamous Cell Carcinoma	[Not Available]	[Not Available]
67	33BC6504-D9AB-4B64-A87C-012915F36644	TCGA-C5-A8ZZ	2014-04-17	NO	YES	-15262	FEMALE	Pre (<6 months since LMP AND no prior bilateral ovariectomy AND not on estrogen replacement)	[Not Available]	[Not Available]	[Not Available]	WHITE	4	NOT HISPANIC OR LATINO	0	No	0	TUMOR FREE	0	4	Alive	636	[Not Applicable]	[Not Available]	[Not Available]	0	[Not Available]	[Not Available]	[Not Available]	YES	21	2	[Not Available]	20	[Not Available]	[Not Available]	[Not Available]	[Not Available]	[Not Available]	[Not Applicable]	[Not Available]	[Not Available]	[Not Available]	[Not Available]	[Not Available]	[Not Available]	Cervical Squamous Cell Carcinoma	[Not Available]	[Not Available]
68	E8F07D20-D043-4C69-8898-87D0F0FC5A9A	TCGA-C5-A901	2014-04-01	NO	YES	-16186	FEMALE	[Not Available]	166	54	[Not Available]	WHITE	[Not Available]	[Not Evaluated]	[Not Available]	No	[Not Available]	TUMOR FREE	[Not Available]	0	Alive	518	[Not Applicable]	[Not Available]	[Not Available]	[Not Available]	[Not Available]	[Not Available]	[Not Available]	NO	[Not Available]	5	[Not Available]	2	[Not Available]	[Not Available]	[Not Available]	[Not Available]	[Not Available]	[Not Applicable]	[Not Available]	[Not Available]	[Not Available]	[Not Available]	[Not Available]	[Not Available]	Cervical Squamous Cell Carcinoma	[Not Available]	[Not Available]
69	010A807F-9DC0-4E14-9533-DCF478F3D947	TCGA-C5-A902	2014-04-17	NO	YES	-12959	FEMALE	[Not Available]	177	83	[Not Available]	BLACK OR AFRICAN AMERICAN	1	NOT HISPANIC OR LATINO	[Not Available]	No	[Not Available]	TUMOR FREE	[Not Available]	1	Alive	149	[Not Applicable]	[Not Available]	[Not Available]	[Not Available]	[Not Available]	[Not Available]	[Not Available]	YES	14	2	[Not Available]	21	[Not Available]	[Not Available]	[Not Available]	[Not Available]	[Not Available]	[Not Applicable]	[Not Available]	[Not Available]	[Not Available]	[Not Available]	[Not Available]	[Not Available]	Cervical Squamous Cell Carcinoma	[Not Available]	[Not Available]
70	C99F476B-E8B1-4CDD-9164-0DA450064886	TCGA-C5-A905	2014-04-01	NO	YES	-13584	FEMALE	[Not Available]	[Not Available]	73	[Not Available]	BLACK OR AFRICAN AMERICAN	9	NOT HISPANIC OR LATINO	[Not Available]	No	[Not Available]	TUMOR FREE	[Not Available]	9	Alive	4879	[Not Applicable]	[Not Available]	[Not Available]	[Not Available]	[Not Available]	NO	[Not Available]	NO	[Not Available]	[Unknown]	[Not Available]	[Not Available]	[Not Available]	[Not Available]	[Not Available]	[Not Available]	[Not Available]	[Not Applicable]	[Not Available]	[Not Available]	[Not Available]	[Not Available]	[Not Available]	[Not Available]	Cervical Squamous Cell Carcinoma	[Not Available]	[Not Available]
71	C92696BA-F549-480D-8D4A-5F23B27AA336	TCGA-C5-A907	2014-04-01	NO	YES	-17304	FEMALE	[Not Available]	163	95	[Not Available]	WHITE	3	NOT HISPANIC OR LATINO	[Not Available]	No	[Not Available]	TUMOR FREE	[Not Available]	4	Alive	136	[Not Applicable]	[Not Available]	[Not Available]	1	[Not Available]	NO	[Not Available]	YES	17	4	2006	[Not Available]	[Not Available]	[Not Available]	[Not Available]	[Not Available]	[Not Available]	[Not Applicable]	[Not Available]	[Not Available]	[Not Available]	[Not Available]	[Not Available]	[Not Available]	Cervical Squamous Cell Carcinoma	[Not Available]	[Not Available]
72	6248F2A3-0DA9-419F-AB77-C3F6F4353EB5	TCGA-DG-A2KH	2013-10-11	NO	YES	-9209	FEMALE	Pre (<6 months since LMP AND no prior bilateral ovariectomy AND not on estrogen replacement)	[Not Available]	[Not Available]	[Unknown]	[Not Evaluated]	1	[Not Evaluated]	[Not Available]	No	[Not Available]	[Unknown]	[Not Available]	[Not Available]	Alive	34	[Not Applicable]	[Not Available]	[Not Available]	[Not Available]	[Not Available]	NO	[Not Available]	[Unknown]	[Not Available]	4	[Not Available]	[Not Available]	[Unknown]	[Not Available]	0	[Not Available]	Pre-Adjuvant Therapy	[Not Applicable]	[Not Available]	[Not Available]	[Not Available]	[Unknown]	[Not Available]	[Not Available]	Adenosquamous	[Not Available]	[Not Available]
73	7C93642D-7E05-40F8-B1EF-A014EDCFBA42	TCGA-DG-A2KJ	2013-10-10	NO	YES	-18453	FEMALE	[Unknown]	[Not Available]	[Not Available]	[Unknown]	[Not Evaluated]	[Not Available]	[Not Evaluated]	[Not Available]	No	[Not Available]	TUMOR FREE	[Not Available]	[Not Available]	Alive	1791	[Not Applicable]	[Not Available]	[Not Available]	[Not Available]	[Not Available]	[Not Available]	[Not Available]	[Not Available]	[Not Available]	[Unknown]	[Not Available]	[Not Available]	[Not Available]	[Not Available]	0	[Not Available]	Pre-Adjuvant Therapy	[Not Applicable]	[Not Available]	[Not Available]	[Not Available]	[Not Available]	[Not Available]	[Not Available]	Cervical Squamous Cell Carcinoma	[Not Available]	[Not Available]
74	8DBCB17D-0396-4FAA-9B32-8E2566424BFF	TCGA-DG-A2KK	2013-10-11	NO	YES	-18834	FEMALE	Post (prior bilateral ovariectomy OR >12 mo since LMP with no prior hysterectomy)	157	64	[Unknown]	[Not Evaluated]	[Not Available]	[Not Evaluated]	[Not Available]	No	[Not Available]	TUMOR FREE	[Not Available]	0	Alive	1544	[Not Applicable]	[Not Available]	[Not Available]	[Not Available]	[Not Available]	[Not Available]	[Not Available]	[Not Available]	27	4	2007	25	[Not Available]	[Not Available]	0	[Not Available]	Pre-Adjuvant Therapy	[Not Applicable]	[Not Available]	[Not Available]	[Not Available]	Complete Remission/Response	[Not Available]	[Not Available]	Cervical Squamous Cell Carcinoma	[Not Available]	[Not Available]
75	2DA977FC-8B46-4C40-9636-B12FD36A98E4	TCGA-DG-A2KL	2014-06-20	NO	YES	-19539	FEMALE	Post (prior bilateral ovariectomy OR >12 mo since LMP with no prior hysterectomy)	155	75	[Unknown]	[Not Evaluated]	5	[Not Evaluated]	0	No	0	TUMOR FREE	0	5	Alive	1367	[Not Applicable]	[Not Available]	[Not Available]	0	[Not Available]	NO	[Not Available]	[Not Available]	[Not Available]	2	[Not Available]	25	[Not Available]	[Not Available]	0	[Not Available]	Pre-Adjuvant Therapy	[Not Applicable]	[Not Available]	[Not Available]	[Not Available]	Complete Remission/Response	[Not Available]	[Not Available]	Cervical Squamous Cell Carcinoma	[Not Available]	[Not Available]
76	E87FADBE-C58C-41D1-B413-8CF6CE70CE94	TCGA-DG-A2KM	2013-10-10	NO	YES	-16808	FEMALE	[Unknown]	169	[Not Available]	Former User	[Not Evaluated]	2	[Not Evaluated]	[Not Available]	No	[Not Available]	TUMOR FREE	[Not Available]	2	Alive	1218	[Not Applicable]	[Not Available]	[Not Available]	[Not Available]	[Not Available]	[Not Available]	[Not Available]	[Not Available]	[Not Available]	1	[Not Available]	[Not Available]	[Not Available]	[Not Available]	0	[Not Available]	Pre-Adjuvant Therapy	[Not Applicable]	[Not Available]	[Not Available]	[Not Available]	Complete Remission/Response	[Not Available]	[Not Available]	Cervical Squamous Cell Carcinoma	[Not Available]	[Not Available]
77	36605f5f-245c-41e5-a9db-705373da7923	TCGA-DR-A0ZL	2011-03-28	NO	YES	-19384	FEMALE	Post (prior bilateral ovariectomy OR >12 mo since LMP with no prior hysterectomy)	155	57	Never Used	ASIAN	1	NOT HISPANIC OR LATINO	0	No	0	TUMOR FREE	0	1	Alive	2155	[Not Applicable]	[Not Available]	[Not Available]	0	[Not Available]	[Not Available]	[Not Available]	[Not Available]	[Not Available]	1	[Not Available]	[Not Available]	[Not Available]	[Not Available]	[Not Available]	[Not Available]	[Not Available]	[Not Applicable]	[Not Available]	[Not Available]	[Not Available]	[Not Available]	[Not Available]	[Not Available]	Cervical Squamous Cell Carcinoma	[Not Available]	[Not Available]
78	748aada0-448f-4523-9893-3d9618fdbe18	TCGA-DR-A0ZM	2011-03-28	NO	YES	-22464	FEMALE	Post (prior bilateral ovariectomy OR >12 mo since LMP with no prior hysterectomy)	158	64	Former User	WHITE	3	NOT HISPANIC OR LATINO	[Not Available]	No	[Not Available]	TUMOR FREE	[Not Available]	4	Alive	1289	[Not Applicable]	[Not Available]	[Not Available]	1	[Not Available]	[Not Available]	[Not Available]	[Not Available]	30	2	[Not Available]	15	[Not Available]	[Not Available]	0	[Not Available]	Preoperative	[Not Applicable]	[Not Available]	[Not Available]	[Not Available]	[Not Available]	[Not Available]	[Not Available]	Cervical Squamous Cell Carcinoma	[Not Available]	[Not Available]
79	5ed3c95a-10d0-4cd5-a54d-523e81587fb1	TCGA-DS-A0VK	2011-02-03	NO	YES	-16792	FEMALE	Pre (<6 months since LMP AND no prior bilateral ovariectomy AND not on estrogen replacement)	165	52	Never Used	WHITE	1	NOT HISPANIC OR LATINO	3	No	0	WITH TUMOR	0	4	Dead	[Not Available]	1118	[Not Available]	[Not Available]	0	[Not Available]	[Not Available]	[Not Available]	[Not Available]	[Not Available]	4	[Not Available]	[Not Available]	[Not Available]	[Not Available]	1	[Not Available]	Preoperative	[Not Applicable]	[Not Available]	[Not Available]	[Not Available]	[Not Available]	[Not Available]	[Not Available]	Cervical Squamous Cell Carcinoma	[Not Available]	[Not Available]
80	dfd30f94-19e3-4838-95df-14a3763419af	TCGA-DS-A0VL	2011-01-07	NO	YES	-9186	FEMALE	Pre (<6 months since LMP AND no prior bilateral ovariectomy AND not on estrogen replacement)	170	86	Never Used	WHITE	4	[Not Available]	0	No	0	TUMOR FREE	0	5	Alive	81	[Not Applicable]	[Not Available]	[Not Available]	1	[Not Available]	[Not Available]	[Not Available]	[Not Available]	[Not Available]	1	[Not Available]	[Not Available]	[Not Available]	[Not Available]	0	[Not Available]	Preoperative	[Not Applicable]	[Not Available]	[Not Available]	[Not Available]	[Not Available]	[Not Available]	[Not Available]	Cervical Squamous Cell Carcinoma	[Not Available]	[Not Available]
81	ed6d989d-da09-4818-8fed-f33d88b628af	TCGA-DS-A0VM	2011-01-07	NO	YES	-18839	FEMALE	Post (prior bilateral ovariectomy OR >12 mo since LMP with no prior hysterectomy)	163	69	Former User	WHITE	2	NOT HISPANIC OR LATINO	0	No	0	TUMOR FREE	0	2	Alive	2128	[Not Applicable]	[Not Available]	[Not Available]	0	[Not Available]	[Not Available]	[Not Available]	[Not Available]	[Not Available]	1	[Not Available]	[Not Available]	[Not Available]	[Not Available]	1	[Not Available]	Preoperative	[Not Applicable]	[Not Available]	[Not Available]	[Not Available]	[Not Available]	[Not Available]	[Not Available]	Cervical Squamous Cell Carcinoma	[Not Available]	[Not Available]
82	f8d342f5-9b92-42e1-8b0d-0876cc26965d	TCGA-DS-A0VN	2011-03-04	NO	YES	-17433	FEMALE	Pre (<6 months since LMP AND no prior bilateral ovariectomy AND not on estrogen replacement)	165	81	Former User	WHITE	2	NOT HISPANIC OR LATINO	2	No	0	TUMOR FREE	0	4	Alive	2910	[Not Applicable]	[Not Available]	[Not Available]	0	[Not Available]	[Not Available]	[Not Available]	[Not Available]	[Not Available]	1	[Not Available]	[Not Available]	[Not Available]	[Not Available]	1	[Not Available]	Preoperative	[Not Applicable]	[Not Available]	[Not Available]	[Not Available]	[Not Available]	[Not Available]	[Not Available]	Cervical Squamous Cell Carcinoma	[Not Available]	[Not Available]
83	b8eae533-2ad6-4dcf-98af-0fe7ff23a879	TCGA-DS-A1O9	2011-08-12	NO	YES	-27433	FEMALE	Post (prior bilateral ovariectomy OR >12 mo since LMP with no prior hysterectomy)	132	32	Never Used	WHITE	2	NOT HISPANIC OR LATINO	0	No	0	WITH TUMOR	0	2	Dead	[Not Available]	266	[Not Available]	[Not Available]	0	[Not Available]	[Not Available]	[Not Available]	[Not Available]	[Not Available]	2	[Not Available]	[Not Available]	[Not Available]	[Not Available]	1	[Not Available]	Preoperative	[Not Applicable]	[Not Available]	[Not Available]	[Not Available]	[Not Available]	[Not Available]	[Not Available]	Cervical Squamous Cell Carcinoma	[Not Available]	[Not Available]
84	46c67dd6-8e66-411d-ad05-95daa9005eb2	TCGA-DS-A1OA	2011-08-12	NO	YES	-28160	FEMALE	Post (prior bilateral ovariectomy OR >12 mo since LMP with no prior hysterectomy)	160	51	Never Used	ASIAN	7	NOT HISPANIC OR LATINO	0	No	0	WITH TUMOR	0	7	Dead	[Not Available]	879	[Not Available]	[Not Available]	0	[Not Available]	[Not Available]	[Not Available]	[Not Available]	[Not Available]	1	[Not Available]	[Not Available]	[Not Available]	[Not Available]	0	[Not Available]	Preoperative	[Not Applicable]	[Not Available]	[Not Available]	[Not Available]	[Not Available]	[Not Available]	[Not Available]	Cervical Squamous Cell Carcinoma	[Not Available]	[Not Available]
85	29a48c93-bade-4346-a901-de35a6537337	TCGA-DS-A1OB	2012-01-04	NO	YES	-16685	FEMALE	Pre (<6 months since LMP AND no prior bilateral ovariectomy AND not on estrogen replacement)	152	72	Never Used	WHITE	1	NOT HISPANIC OR LATINO	[Not Available]	No	[Not Available]	WITH TUMOR	[Not Available]	4	Dead	[Not Available]	861	[Not Available]	[Not Available]	[Not Available]	[Not Available]	[Not Available]	[Not Available]	[Not Available]	[Not Available]	[Not Available]	[Not Available]	[Not Available]	[Not Available]	[Not Available]	1	[Not Available]	Preoperative	[Not Applicable]	[Not Available]	[Not Available]	[Not Available]	[Not Available]	[Not Available]	[Not Available]	Cervical Squamous Cell Carcinoma	[Not Available]	[Not Available]
86	e711b88e-fa0e-4781-8549-7a53ed3a13a1	TCGA-DS-A1OC	2011-08-12	NO	YES	-17357	FEMALE	Pre (<6 months since LMP AND no prior bilateral ovariectomy AND not on estrogen replacement)	140	78	[Not Available]	WHITE	3	HISPANIC OR LATINO	0	No	0	TUMOR FREE	0	3	Alive	376	[Not Applicable]	[Not Available]	[Not Available]	0	[Not Available]	[Not Available]	[Not Available]	[Not Available]	[Not Available]	4	[Not Available]	[Not Available]	[Not Available]	[Not Available]	1	[Not Available]	Preoperative	[Not Applicable]	[Not Available]	[Not Available]	[Not Available]	[Not Available]	[Not Available]	[Not Available]	Cervical Squamous Cell Carcinoma	[Not Available]	[Not Available]
87	ec609ebe-2db9-4b95-a154-512fdfa9038f	TCGA-DS-A1OD	2011-08-12	NO	YES	-17954	FEMALE	Pre (<6 months since LMP AND no prior bilateral ovariectomy AND not on estrogen replacement)	155	89	Never Used	WHITE	1	NOT HISPANIC OR LATINO	0	No	0	TUMOR FREE	0	1	Alive	3097	[Not Applicable]	[Not Available]	[Not Available]	0	[Not Available]	[Not Available]	[Not Available]	[Not Available]	[Not Available]	4	[Not Available]	[Not Available]	[Not Available]	[Not Available]	1	[Not Available]	Preoperative	[Not Applicable]	[Not Available]	[Not Available]	[Not Available]	[Not Available]	[Not Available]	[Not Available]	Cervical Squamous Cell Carcinoma	[Not Available]	[Not Available]
88	63BFFDB1-BC08-4175-8BE7-D7A056D19816	TCGA-DS-A3LQ	2012-04-23	YES	NO	-16861	FEMALE	Pre (<6 months since LMP AND no prior bilateral ovariectomy AND not on estrogen replacement)	163	72	Former User	[Not Available]	2	[Not Available]	[Not Available]	No	[Not Available]	[Not Available]	[Not Available]	7	Alive	183	[Not Applicable]	[Not Available]	[Not Available]	[Not Available]	[Not Available]	[Not Available]	[Not Available]	[Not Available]	[Not Available]	3	1978	[Not Available]	[Not Available]	[Not Available]	1	[Not Available]	Preoperative	[Not Applicable]	[Not Available]	[Not Available]	[Not Available]	[Not Available]	[Not Available]	[Not Available]	Cervical Squamous Cell Carcinoma	[Not Available]	[Not Available]
89	B16469AF-A721-43E9-A4D7-C39B94D1139F	TCGA-DS-A5RQ	2013-05-15	YES	NO	-29526	FEMALE	Post (prior bilateral ovariectomy OR >12 mo since LMP with no prior hysterectomy)	148	61	[Unknown]	WHITE	3	NOT HISPANIC OR LATINO	0	No	0	TUMOR FREE	0	3	Alive	208	[Not Applicable]	[Not Available]	[Not Available]	0	[Not Available]	NO	[Not Available]	YES	27	2	[Not Available]	35	[Not Available]	[Not Available]	1	[Not Available]	Preoperative	[Not Applicable]	[Not Available]	[Not Available]	[Not Available]	Complete Remission/Response	[Not Available]	[Not Available]	Cervical Squamous Cell Carcinoma	[Not Available]	[Not Available]
90	D02FFAA9-0403-4A89-BE01-CCE35C80DD69	TCGA-DS-A7WF	2013-12-23	NO	YES	-15319	FEMALE	Pre (<6 months since LMP AND no prior bilateral ovariectomy AND not on estrogen replacement)	160	63	Never Used	[Unknown]	1	HISPANIC OR LATINO	1	No	0	WITH TUMOR	0	3	Dead	[Not Available]	492	Cervical Cancer	[Not Available]	1	[Not Available]	NO	[Not Available]	YES	[Not Available]	2	[Not Available]	7	[Not Available]	[Not Available]	1	[Not Available]	Preoperative	[Not Applicable]	[Not Available]	[Not Available]	[Not Available]	Partial Remission/Response	[Not Available]	[Not Available]	Adenosquamous	[Not Available]	[Not Available]
91	DADCF6D5-03EB-4090-BCC3-B9E9DC3C7E08	TCGA-DS-A7WH	2012-12-23	YES	NO	-12644	FEMALE	Pre (<6 months since LMP AND no prior bilateral ovariectomy AND not on estrogen replacement)	168	50	Former User	WHITE	0	NOT HISPANIC OR LATINO	1	No	0	TUMOR FREE	0	2	Alive	223	[Not Applicable]	[Not Available]	[Not Available]	1	[Not Available]	NO	[Not Available]	YES	[Not Available]	1	[Not Available]	[Not Available]	[Not Available]	[Not Available]	1	[Not Available]	Preoperative	[Not Applicable]	[Not Available]	[Not Available]	[Not Available]	Complete Remission/Response	[Not Available]	[Not Available]	Mucinous Adenocarcinoma of Endocervical Type	[Not Available]	[Not Available]
92	C14468EB-E725-4029-96CC-75BB9EBD9DEF	TCGA-DS-A7WI	2013-12-23	YES	NO	-15970	FEMALE	Pre (<6 months since LMP AND no prior bilateral ovariectomy AND not on estrogen replacement)	165	57	Never Used	WHITE	7	NOT HISPANIC OR LATINO	0	No	0	WITH TUMOR	0	8	Dead	[Not Available]	252	Cervical Cancer	[Not Available]	1	[Not Available]	NO	[Not Available]	YES	[Not Available]	1	[Not Available]	[Not Available]	[Not Available]	[Not Available]	1	[Not Available]	Preoperative	[Not Applicable]	[Not Available]	[Not Available]	[Not Available]	Complete Remission/Response	[Not Available]	[Not Available]	Cervical Squamous Cell Carcinoma	[Not Available]	[Not Available]
93	6F9D21C0-3B88-450D-A249-3E9BAFBA2DFA	TCGA-EA-A1QS	2012-07-06	YES	NO	-16923	FEMALE	Post (prior bilateral ovariectomy OR >12 mo since LMP with no prior hysterectomy)	164	60	Never Used	WHITE	2	NOT HISPANIC OR LATINO	4	No	0	TUMOR FREE	0	6	Alive	40	[Not Applicable]	[Not Available]	[Not Available]	0	[Not Available]	NO	[Not Available]	[Unknown]	[Not Available]	1	[Not Available]	[Not Available]	[Not Available]	[Not Available]	[Not Available]	[Not Available]	[Not Available]	[Not Applicable]	[Not Available]	[Not Available]	[Not Available]	Complete Remission/Response	[Not Available]	[Not Available]	Cervical Squamous Cell Carcinoma	[Not Available]	[Not Available]
94	970b619f-2eb5-4557-a7b8-5def35943c58	TCGA-EA-A1QT	2011-08-03	YES	NO	-17475	FEMALE	Post (prior bilateral ovariectomy OR >12 mo since LMP with no prior hysterectomy)	163	68	Never Used	WHITE	2	NOT HISPANIC OR LATINO	3	No	0	[Not Available]	0	5	Alive	8	[Not Applicable]	[Not Available]	[Not Available]	0	[Not Available]	[Not Available]	[Not Available]	[Not Available]	[Not Available]	1	[Not Available]	[Not Available]	[Not Available]	[Not Available]	[Not Available]	[Not Available]	[Not Available]	[Not Applicable]	[Not Available]	[Not Available]	[Not Available]	[Not Available]	[Not Available]	[Not Available]	Cervical Squamous Cell Carcinoma	[Not Available]	[Not Available]
95	6BF00B63-89F8-420C-8D36-F680FB0908B1	TCGA-EA-A3HQ	2012-02-17	YES	NO	-21966	FEMALE	Post (prior bilateral ovariectomy OR >12 mo since LMP with no prior hysterectomy)	160	88	Never Used	WHITE	2	NOT HISPANIC OR LATINO	2	No	0	TUMOR FREE	0	4	Alive	65	[Not Applicable]	[Not Available]	[Not Available]	0	[Not Available]	[Not Available]	[Not Available]	[Not Available]	[Not Available]	1	[Not Available]	[Not Available]	[Not Available]	[Not Available]	[Not Available]	[Not Available]	[Not Available]	[Not Applicable]	[Not Available]	[Not Available]	[Not Available]	[Not Available]	[Not Available]	[Not Available]	Cervical Squamous Cell Carcinoma	[Not Available]	[Not Available]
96	638035F6-2909-4A44-980F-468AC5D74E18	TCGA-EA-A3HR	2011-12-20	YES	NO	-20980	FEMALE	Post (prior bilateral ovariectomy OR >12 mo since LMP with no prior hysterectomy)	146	86	Never Used	WHITE	2	NOT HISPANIC OR LATINO	13	No	[Not Available]	TUMOR FREE	[Not Available]	15	Alive	40	[Not Applicable]	[Not Available]	[Not Available]	0	[Not Available]	[Not Available]	[Not Available]	[Not Available]	[Not Available]	1	[Not Available]	[Not Available]	[Not Available]	[Not Available]	[Not Available]	[Not Available]	[Not Available]	[Not Applicable]	[Not Available]	[Not Available]	[Not Available]	[Not Available]	[Not Available]	[Not Available]	Cervical Squamous Cell Carcinoma	[Not Available]	[Not Available]
97	753EE373-FBCF-4349-B9B2-5A41936E27E9	TCGA-EA-A3HS	2011-12-20	YES	NO	-13117	FEMALE	Pre (<6 months since LMP AND no prior bilateral ovariectomy AND not on estrogen replacement)	169	54	Never Used	WHITE	1	NOT HISPANIC OR LATINO	1	No	0	TUMOR FREE	0	2	Alive	40	[Not Applicable]	[Not Available]	[Not Available]	0	[Not Available]	[Not Available]	[Not Available]	[Not Available]	[Not Available]	1	[Not Available]	[Not Available]	[Not Available]	[Not Available]	[Not Available]	[Not Available]	[Not Available]	[Not Applicable]	[Not Available]	[Not Available]	[Not Available]	[Not Available]	[Not Available]	[Not Available]	Cervical Squamous Cell Carcinoma	[Not Available]	[Not Available]
98	3C5B2452-014B-495F-B86A-F522ED84BC3B	TCGA-EA-A3HT	2011-12-20	YES	NO	-25138	FEMALE	Post (prior bilateral ovariectomy OR >12 mo since LMP with no prior hysterectomy)	163	83	Never Used	WHITE	1	NOT HISPANIC OR LATINO	2	No	0	TUMOR FREE	0	3	Alive	19	[Not Applicable]	[Not Available]	[Not Available]	0	[Not Available]	[Not Available]	[Not Available]	[Not Available]	[Not Available]	1	[Not Available]	[Not Available]	[Not Available]	[Not Available]	[Not Available]	[Not Available]	[Not Available]	[Not Applicable]	[Not Available]	[Not Available]	[Not Available]	[Not Available]	[Not Available]	[Not Available]	Cervical Squamous Cell Carcinoma	[Not Available]	[Not Available]
99	9912432E-74BC-4846-93B4-FA2BF8070BD1	TCGA-EA-A3HU	2012-02-17	YES	NO	-15909	FEMALE	Pre (<6 months since LMP AND no prior bilateral ovariectomy AND not on estrogen replacement)	162	68	Never Used	WHITE	2	NOT HISPANIC OR LATINO	10	No	0	TUMOR FREE	0	12	Alive	81	[Not Applicable]	[Not Available]	[Not Available]	0	[Not Available]	[Not Available]	[Not Available]	[Not Available]	[Not Available]	1	[Not Available]	[Not Available]	[Not Available]	[Not Available]	[Not Available]	[Not Available]	[Not Available]	[Not Applicable]	[Not Available]	[Not Available]	[Not Available]	[Not Available]	[Not Available]	[Not Available]	Cervical Squamous Cell Carcinoma	[Not Available]	[Not Available]
100	9E2E29E8-D94A-499F-A98A-5B53B2C38F3B	TCGA-EA-A3QD	2012-04-30	YES	NO	-21655	FEMALE	Post (prior bilateral ovariectomy OR >12 mo since LMP with no prior hysterectomy)	163	105	Former User	WHITE	5	NOT HISPANIC OR LATINO	0	No	0	TUMOR FREE	0	6	Alive	33	[Not Applicable]	[Not Available]	[Not Available]	1	[Not Available]	[Not Available]	[Not Available]	[Not Available]	[Not Available]	1	[Not Available]	[Not Available]	[Not Available]	[Not Available]	0	[Not Available]	Preoperative	[Not Applicable]	[Not Available]	[Not Available]	[Not Available]	[Not Available]	[Not Available]	[Not Available]	Cervical Squamous Cell Carcinoma	[Not Available]	[Not Available]
101	A4E444B5-BBCA-4EF0-B92F-908D608CBB91	TCGA-EA-A3QE	2012-05-09	YES	NO	-16460	FEMALE	Pre (<6 months since LMP AND no prior bilateral ovariectomy AND not on estrogen replacement)	154	73	Never Used	WHITE	1	NOT HISPANIC OR LATINO	4	No	0	TUMOR FREE	0	5	Alive	47	[Not Applicable]	[Not Available]	[Not Available]	0	[Not Available]	[Not Available]	[Not Available]	[Not Available]	[Not Available]	1	[Not Available]	[Not Available]	[Not Available]	[Not Available]	[Not Available]	[Not Available]	[Not Available]	[Not Applicable]	[Not Available]	[Not Available]	[Not Available]	[Not Available]	[Not Available]	[Not Available]	Cervical Squamous Cell Carcinoma	[Not Available]	[Not Available]
102	3AC62513-B5F4-4063-AABD-DAD08A1F56FB	TCGA-EA-A3Y4	2012-09-24	YES	NO	-14706	FEMALE	Pre (<6 months since LMP AND no prior bilateral ovariectomy AND not on estrogen replacement)	167	99	[Not Available]	WHITE	1	NOT HISPANIC OR LATINO	2	No	0	TUMOR FREE	0	3	Alive	35	[Not Applicable]	[Not Available]	[Not Available]	0	[Not Available]	NO	[Not Available]	[Unknown]	[Not Available]	1	[Not Available]	[Not Available]	[Not Available]	[Not Available]	1	[Not Available]	Pre-Adjuvant Therapy	[Not Applicable]	[Not Available]	[Not Available]	[Not Available]	Complete Remission/Response	[Not Available]	[Not Available]	Cervical Squamous Cell Carcinoma	[Not Available]	[Not Available]
103	7B356C12-B226-4E58-BE7F-44E50E3EEFBE	TCGA-EA-A410	2012-09-24	YES	NO	-18720	FEMALE	Pre (<6 months since LMP AND no prior bilateral ovariectomy AND not on estrogen replacement)	160	80	Never Used	WHITE	2	NOT HISPANIC OR LATINO	4	No	0	TUMOR FREE	0	6	Alive	56	[Not Applicable]	[Not Available]	[Not Available]	0	[Not Available]	NO	[Not Available]	[Unknown]	[Not Available]	1	[Not Available]	[Not Available]	[Not Available]	[Not Available]	[Not Available]	[Not Available]	[Not Available]	[Not Applicable]	[Not Available]	[Not Available]	[Not Available]	Complete Remission/Response	[Not Available]	[Not Available]	Cervical Squamous Cell Carcinoma	[Not Available]	[Not Available]
104	84CB84D0-7C7E-453C-8CC5-65B5AF941028	TCGA-EA-A411	2012-09-24	YES	NO	-18561	FEMALE	Post (prior bilateral ovariectomy OR >12 mo since LMP with no prior hysterectomy)	176	74	Former User	WHITE	2	NOT HISPANIC OR LATINO	3	No	0	TUMOR FREE	0	5	Alive	41	[Not Applicable]	[Not Available]	[Not Available]	0	[Not Available]	NO	[Not Available]	[Unknown]	[Not Available]	1	[Not Available]	[Not Available]	[Not Available]	[Not Available]	[Not Available]	[Not Available]	[Not Available]	[Not Applicable]	[Not Available]	[Not Available]	[Not Available]	Complete Remission/Response	[Not Available]	[Not Available]	Cervical Squamous Cell Carcinoma	[Not Available]	[Not Available]
105	3EDB62C1-25AD-4DEB-A005-E881A887D06A	TCGA-EA-A439	2012-11-20	YES	NO	-18529	FEMALE	Pre (<6 months since LMP AND no prior bilateral ovariectomy AND not on estrogen replacement)	160	47	[Not Available]	ASIAN	2	NOT HISPANIC OR LATINO	[Not Available]	No	[Not Available]	TUMOR FREE	[Not Available]	2	Alive	20	[Not Applicable]	[Not Available]	[Not Available]	[Not Available]	[Not Available]	NO	[Not Available]	[Unknown]	[Not Available]	1	[Not Available]	[Not Available]	[Not Available]	[Not Available]	[Not Available]	[Not Available]	[Not Available]	[Not Applicable]	[Not Available]	[Not Available]	[Not Available]	Complete Remission/Response	[Not Available]	[Not Available]	Cervical Squamous Cell Carcinoma	[Not Available]	[Not Available]
106	3265F9C1-7242-4C7D-B4AD-B6519EE94F84	TCGA-EA-A43B	2012-11-20	YES	NO	-15871	FEMALE	Pre (<6 months since LMP AND no prior bilateral ovariectomy AND not on estrogen replacement)	164	72	Never Used	WHITE	2	NOT HISPANIC OR LATINO	[Not Available]	No	[Not Available]	TUMOR FREE	[Not Available]	2	Alive	55	[Not Applicable]	[Not Available]	[Not Available]	[Not Available]	[Not Available]	NO	[Not Available]	[Unknown]	[Not Available]	1	[Not Available]	[Not Available]	[Not Available]	[Not Available]	0	[Not Available]	Preoperative	[Not Applicable]	[Not Available]	[Not Available]	[Not Available]	Complete Remission/Response	[Not Available]	[Not Available]	Cervical Squamous Cell Carcinoma	[Not Available]	[Not Available]
107	CFB61FD8-0BCA-40B4-878C-CC914A289792	TCGA-EA-A44S	2012-12-19	YES	NO	-11621	FEMALE	Pre (<6 months since LMP AND no prior bilateral ovariectomy AND not on estrogen replacement)	182	83	Never Used	WHITE	1	NOT HISPANIC OR LATINO	0	No	0	TUMOR FREE	0	1	Alive	9	[Not Applicable]	[Not Available]	[Not Available]	0	[Not Available]	NO	[Not Available]	[Unknown]	[Not Available]	1	[Not Available]	[Not Available]	[Not Available]	[Not Available]	1	[Not Available]	Preoperative	[Not Applicable]	[Not Available]	[Not Available]	[Not Available]	[Unknown]	[Not Available]	[Not Available]	Cervical Squamous Cell Carcinoma	[Not Available]	[Not Available]
108	9E79059F-3453-4AA6-9849-55A267C711A4	TCGA-EA-A4BA	2013-02-05	YES	NO	-17995	FEMALE	Pre (<6 months since LMP AND no prior bilateral ovariectomy AND not on estrogen replacement)	162	96	Never Used	WHITE	2	NOT HISPANIC OR LATINO	2	No	[Not Available]	TUMOR FREE	[Not Available]	4	Alive	10	[Not Applicable]	[Not Available]	[Not Available]	[Not Available]	[Not Available]	NO	[Not Available]	[Unknown]	[Not Available]	1	[Not Available]	[Not Available]	[Not Available]	[Not Available]	1	[Not Available]	Preoperative	[Not Applicable]	[Not Available]	[Not Available]	[Not Available]	Complete Remission/Response	[Not Available]	[Not Available]	Endocervical Type of Adenocarcinoma	[Not Available]	[Not Available]
109	6A18D184-D3A2-49C2-BD4B-9C18F91B98C7	TCGA-EA-A50E	2013-02-27	YES	NO	-16609	FEMALE	Pre (<6 months since LMP AND no prior bilateral ovariectomy AND not on estrogen replacement)	152	45	Former User	ASIAN	2	NOT HISPANIC OR LATINO	[Not Available]	No	[Not Available]	WITH TUMOR	[Not Available]	2	Alive	8	[Not Applicable]	[Not Available]	[Not Available]	[Not Available]	[Not Available]	NO	[Not Available]	[Unknown]	[Not Available]	1	[Not Available]	[Not Available]	[Not Available]	[Not Available]	[Not Available]	[Not Available]	[Not Available]	[Not Applicable]	[Not Available]	[Not Available]	[Not Available]	[Not Available]	[Not Available]	[Not Available]	Cervical Squamous Cell Carcinoma	[Not Available]	[Not Available]
110	2D34E9A3-298C-4365-B7A1-A507C7F069CD	TCGA-EA-A556	2013-04-22	YES	NO	-13988	FEMALE	Pre (<6 months since LMP AND no prior bilateral ovariectomy AND not on estrogen replacement)	160	62	Never Used	WHITE	1	NOT HISPANIC OR LATINO	0	No	0	TUMOR FREE	0	1	Alive	0	[Not Applicable]	[Not Available]	[Not Available]	0	[Not Available]	NO	[Not Available]	[Unknown]	18	2	[Not Available]	20	[Unknown]	[Not Available]	1	[Not Available]	Preoperative	[Not Applicable]	[Not Available]	[Not Available]	[Not Available]	[Unknown]	[Not Available]	[Not Available]	Endometrioid Adenocarcinoma of Endocervix	[Not Available]	[Not Available]
111	ED17685C-B706-41E4-8A76-11CB0E6700CD	TCGA-EA-A5FO	2013-05-22	YES	NO	-21561	FEMALE	Post (prior bilateral ovariectomy OR >12 mo since LMP with no prior hysterectomy)	162	58	[Unknown]	WHITE	2	NOT HISPANIC OR LATINO	[Not Available]	No	[Not Available]	TUMOR FREE	[Not Available]	[Not Available]	Alive	45	[Not Applicable]	[Not Available]	[Not Available]	[Not Available]	[Not Available]	NO	[Not Available]	[Unknown]	[Not Available]	1	[Not Available]	[Not Available]	[Not Available]	[Not Available]	1	[Not Available]	Preoperative	[Not Applicable]	[Not Available]	[Not Available]	[Not Available]	[Unknown]	[Not Available]	[Not Available]	Cervical Squamous Cell Carcinoma	[Not Available]	[Not Available]
112	1636242C-12DA-412E-A362-914A20ADD708	TCGA-EA-A5O9	2013-05-22	YES	NO	-14472	FEMALE	Pre (<6 months since LMP AND no prior bilateral ovariectomy AND not on estrogen replacement)	160	99	Never Used	WHITE	4	NOT HISPANIC OR LATINO	7	No	0	TUMOR FREE	0	11	Alive	27	[Not Applicable]	[Not Available]	[Not Available]	0	[Not Available]	NO	[Not Available]	YES	[Not Available]	1	[Not Available]	[Not Available]	[Not Available]	[Not Available]	1	[Not Available]	Preoperative	[Not Applicable]	[Not Available]	[Not Available]	[Not Available]	Complete Remission/Response	[Not Available]	[Not Available]	Cervical Squamous Cell Carcinoma	[Not Available]	[Not Available]
113	35D677B6-0487-44D3-BBBA-651EAC7E0635	TCGA-EA-A5ZD	2013-05-24	YES	NO	-14629	FEMALE	Pre (<6 months since LMP AND no prior bilateral ovariectomy AND not on estrogen replacement)	154	47	[Unknown]	ASIAN	2	NOT HISPANIC OR LATINO	[Not Available]	No	[Not Available]	TUMOR FREE	[Not Available]	3	Alive	21	[Not Applicable]	[Not Available]	[Not Available]	1	[Not Available]	NO	[Not Available]	NO	[Not Available]	1	[Not Available]	[Not Available]	[Not Available]	[Not Available]	[Not Available]	[Not Available]	[Not Available]	[Not Applicable]	[Not Available]	[Not Available]	[Not Available]	[Unknown]	[Not Available]	[Not Available]	Cervical Squamous Cell Carcinoma	[Not Available]	[Not Available]
114	5E39485A-AC6B-496D-9984-2EA8075F6A9B	TCGA-EA-A5ZE	2013-05-24	YES	NO	-19868	FEMALE	Peri (6-12 months since last menstrual period)	153	55	Former User	ASIAN	3	NOT HISPANIC OR LATINO	[Not Available]	No	[Not Available]	TUMOR FREE	[Not Available]	3	Alive	22	[Not Applicable]	[Not Available]	[Not Available]	[Not Available]	[Not Available]	NO	[Not Available]	NO	[Not Available]	1	[Not Available]	[Not Available]	[Not Available]	[Not Available]	[Not Available]	[Not Available]	[Not Available]	[Not Applicable]	[Not Available]	[Not Available]	[Not Available]	Complete Remission/Response	[Not Available]	[Not Available]	Cervical Squamous Cell Carcinoma	[Not Available]	[Not Available]
115	0C6BB7DC-45A6-4190-A7C9-B080D49FD58A	TCGA-EA-A5ZF	2013-05-24	YES	NO	-20506	FEMALE	Peri (6-12 months since last menstrual period)	151	51	Former User	ASIAN	3	NOT HISPANIC OR LATINO	[Not Available]	No	[Not Available]	TUMOR FREE	[Not Available]	3	Alive	26	[Not Applicable]	[Not Available]	[Not Available]	[Not Available]	[Not Available]	NO	[Not Available]	NO	[Not Available]	1	[Not Available]	[Not Available]	[Not Available]	[Not Available]	[Not Available]	[Not Available]	[Not Available]	[Not Applicable]	[Not Available]	[Not Available]	[Not Available]	Complete Remission/Response	[Not Available]	[Not Available]	Cervical Squamous Cell Carcinoma	[Not Available]	[Not Available]
116	A300DB40-E0B8-4C45-ABBD-D7AA06211E9C	TCGA-EA-A6QX	2013-10-16	YES	NO	-18035	FEMALE	Peri (6-12 months since last menstrual period)	154	49	[Unknown]	ASIAN	2	NOT HISPANIC OR LATINO	2	No	[Not Available]	TUMOR FREE	[Not Available]	4	Alive	19	[Not Applicable]	[Not Available]	[Not Available]	[Not Available]	[Not Available]	NO	[Not Available]	[Unknown]	[Not Available]	1	[Not Available]	[Not Available]	[Not Available]	[Not Available]	[Not Available]	[Not Available]	[Not Available]	[Not Applicable]	[Not Available]	[Not Available]	[Not Available]	[Not Available]	[Not Available]	[Not Available]	Cervical Squamous Cell Carcinoma	[Not Available]	[Not Available]
117	79AE5209-F476-4D65-A6C0-EBC18D7C8942	TCGA-EA-A78R	2013-11-21	YES	NO	-19942	FEMALE	Peri (6-12 months since last menstrual period)	160	63	[Unknown]	ASIAN	3	NOT HISPANIC OR LATINO	[Not Available]	No	[Not Available]	TUMOR FREE	[Not Available]	3	Alive	12	[Not Applicable]	[Not Available]	[Not Available]	[Not Available]	[Not Available]	NO	[Not Available]	[Unknown]	[Not Available]	1	[Not Available]	[Not Available]	[Not Available]	[Not Available]	[Not Available]	[Not Available]	[Not Available]	[Not Applicable]	[Not Available]	[Not Available]	[Not Available]	[Not Available]	[Not Available]	[Not Available]	Cervical Squamous Cell Carcinoma	[Not Available]	[Not Available]
118	87E701AB-ACFD-45F2-A12E-323C94E5F3D5	TCGA-EA-A97N	2014-04-18	YES	NO	-13984	FEMALE	Pre (<6 months since LMP AND no prior bilateral ovariectomy AND not on estrogen replacement)	160	60	Never Used	WHITE	2	NOT HISPANIC OR LATINO	3	No	[Not Available]	TUMOR FREE	[Not Available]	5	Alive	11	[Not Applicable]	[Not Available]	[Not Available]	[Not Available]	[Not Available]	NO	[Not Available]	NO	[Not Available]	1	[Not Available]	[Not Available]	[Not Available]	[Not Available]	1	[Not Available]	Preoperative	[Not Applicable]	[Not Available]	[Not Available]	[Not Available]	Complete Remission/Response	[Not Available]	[Not Available]	Cervical Squamous Cell Carcinoma	[Not Available]	[Not Available]
119	D7F07485-522A-49D9-B105-5A9A51ACA8F7	TCGA-EK-A2GZ	2011-11-08	NO	YES	-23599	FEMALE	Post (prior bilateral ovariectomy OR >12 mo since LMP with no prior hysterectomy)	160	64	[Not Available]	BLACK OR AFRICAN AMERICAN	5	NOT HISPANIC OR LATINO	[Not Available]	No	[Not Available]	WITH TUMOR	[Not Available]	5	Alive	383	[Not Applicable]	[Not Available]	[Not Available]	[Not Available]	[Not Available]	[Not Available]	[Not Available]	[Not Available]	[Not Available]	[Not Available]	[Not Available]	[Not Available]	[Not Available]	[Not Available]	0	[Not Available]	Preoperative	[Not Applicable]	[Not Available]	[Not Available]	[Not Available]	[Not Available]	[Not Available]	[Not Available]	Cervical Squamous Cell Carcinoma	[Not Available]	[Not Available]
120	C83C52F4-3815-4F49-8218-CF80AAA62E2F	TCGA-EK-A2H0	2011-11-03	NO	YES	-8918	FEMALE	Pre (<6 months since LMP AND no prior bilateral ovariectomy AND not on estrogen replacement)	156	88	[Not Available]	WHITE	0	[Not Available]	[Not Available]	No	[Not Available]	TUMOR FREE	[Not Available]	0	Alive	1398	[Not Applicable]	[Not Available]	[Not Available]	[Not Available]	[Not Available]	[Not Available]	[Not Available]	[Not Available]	[Not Available]	[Not Available]	[Not Available]	[Not Available]	[Not Available]	[Not Available]	0	[Not Available]	Preoperative	[Not Applicable]	[Not Available]	[Not Available]	[Not Available]	[Not Available]	[Not Available]	[Not Available]	Cervical Squamous Cell Carcinoma	[Not Available]	[Not Available]
121	690A7B2A-7DC5-4504-9372-70C8B55E81C7	TCGA-EK-A2H1	2011-11-03	NO	YES	-7649	FEMALE	Pre (<6 months since LMP AND no prior bilateral ovariectomy AND not on estrogen replacement)	160	62	[Not Available]	WHITE	[Not Available]	[Not Available]	[Not Available]	No	[Not Available]	TUMOR FREE	[Not Available]	[Not Available]	Alive	799	[Not Applicable]	[Not Available]	[Not Available]	[Not Available]	[Not Available]	[Not Available]	[Not Available]	[Not Available]	[Not Available]	[Not Available]	[Not Available]	[Not Available]	[Not Available]	[Not Available]	0	[Not Available]	Preoperative	[Not Applicable]	[Not Available]	[Not Available]	[Not Available]	[Not Available]	[Not Available]	[Not Available]	Cervical Squamous Cell Carcinoma	[Not Available]	[Not Available]
122	76B54726-D348-4A1B-AE26-5B08D2EFFC9D	TCGA-EK-A2IP	2011-11-04	NO	YES	-10347	FEMALE	[Not Available]	167	69	[Not Available]	WHITE	1	[Not Available]	[Not Available]	No	[Not Available]	[Not Available]	[Not Available]	2	Alive	202	[Not Applicable]	[Not Available]	[Not Available]	1	[Not Available]	[Not Available]	[Not Available]	[Not Available]	[Not Available]	[Not Available]	[Not Available]	[Not Available]	[Not Available]	[Not Available]	0	[Not Available]	Preoperative	[Not Applicable]	[Not Available]	[Not Available]	[Not Available]	[Not Available]	[Not Available]	[Not Available]	Cervical Squamous Cell Carcinoma	[Not Available]	[Not Available]
123	A04CB81E-53BD-4686-9626-52EE87E3E261	TCGA-EK-A2IR	2011-11-08	NO	YES	-17581	FEMALE	[Not Available]	160	61	[Not Available]	WHITE	1	[Not Available]	[Not Available]	No	[Not Available]	TUMOR FREE	[Not Available]	1	Alive	2679	[Not Applicable]	[Not Available]	[Not Available]	[Not Available]	[Not Available]	[Not Available]	[Not Available]	[Not Available]	[Not Available]	[Not Available]	[Not Available]	18	[Not Available]	[Not Available]	0	[Not Available]	Preoperative	[Not Applicable]	[Not Available]	[Not Available]	[Not Available]	[Not Available]	[Not Available]	[Not Available]	Cervical Squamous Cell Carcinoma	[Not Available]	[Not Available]
124	5194A247-CFEE-4C11-9475-CF5521A8C6E3	TCGA-EK-A2PG	2011-12-12	NO	YES	-32500	FEMALE	Post (prior bilateral ovariectomy OR >12 mo since LMP with no prior hysterectomy)	155	55	[Not Available]	BLACK OR AFRICAN AMERICAN	[Not Available]	[Not Available]	[Not Available]	No	[Not Available]	[Not Available]	[Not Available]	[Not Available]	Alive	16	[Not Applicable]	[Not Available]	[Not Available]	[Not Available]	[Not Available]	[Not Available]	[Not Available]	[Not Available]	[Not Available]	[Not Available]	[Not Available]	[Not Available]	[Not Available]	[Not Available]	4	[Not Available]	Preoperative	[Not Applicable]	[Not Available]	[Not Available]	[Not Available]	[Not Available]	[Not Available]	[Not Available]	Cervical Squamous Cell Carcinoma	[Not Available]	[Not Available]
125	BFD82578-8B60-4C23-85A1-FC14A1CF5F12	TCGA-EK-A2PI	2011-12-01	NO	YES	-16324	FEMALE	[Not Available]	162	53	[Not Available]	WHITE	[Not Available]	[Not Available]	[Not Available]	No	[Not Available]	WITH TUMOR	[Not Available]	[Not Available]	Alive	0	[Not Applicable]	[Not Available]	[Not Available]	[Not Available]	[Not Available]	[Not Available]	[Not Available]	[Not Available]	[Not Available]	[Not Available]	[Not Available]	[Not Available]	[Not Available]	[Not Available]	0	[Not Available]	Preoperative	[Not Applicable]	[Not Available]	[Not Available]	[Not Available]	[Not Available]	[Not Available]	[Not Available]	Cervical Squamous Cell Carcinoma	[Not Available]	[Not Available]
126	0809BA8B-4AB6-4F43-934C-C1CCBC014A7E	TCGA-EK-A2PK	2011-12-08	NO	YES	-15939	FEMALE	Indeterminate (neither Pre or Postmenopausal)	167	94	[Not Available]	WHITE	[Not Available]	NOT HISPANIC OR LATINO	[Not Available]	No	[Not Available]	TUMOR FREE	[Not Available]	[Not Available]	Alive	0	[Not Applicable]	[Not Available]	[Not Available]	[Not Available]	[Not Available]	[Not Available]	[Not Available]	[Not Available]	[Not Available]	[Not Available]	[Not Available]	[Not Available]	[Not Available]	[Not Available]	1	[Not Available]	Preoperative	[Not Applicable]	[Not Available]	[Not Available]	[Not Available]	[Not Available]	[Not Available]	[Not Available]	Cervical Squamous Cell Carcinoma	[Not Available]	[Not Available]
127	45CADCF3-EA98-4063-9255-5C18D6A5CBAB	TCGA-EK-A2PL	2011-12-02	NO	YES	-13384	FEMALE	[Not Available]	167	113	[Not Available]	WHITE	3	[Not Available]	[Not Available]	No	[Not Available]	WITH TUMOR	[Not Available]	6	Alive	0	[Not Applicable]	[Not Available]	[Not Available]	[Not Available]	[Not Available]	[Not Available]	[Not Available]	[Not Available]	[Not Available]	[Not Available]	[Not Available]	[Not Available]	[Not Available]	[Not Available]	0	[Not Available]	Preoperative	[Not Applicable]	[Not Available]	[Not Available]	[Not Available]	[Not Available]	[Not Available]	[Not Available]	Cervical Squamous Cell Carcinoma	[Not Available]	[Not Available]
128	085FB6D8-6265-484E-9307-8292386714B7	TCGA-EK-A2PM	2011-12-02	NO	YES	-29747	FEMALE	Post (prior bilateral ovariectomy OR >12 mo since LMP with no prior hysterectomy)	157	51	[Not Available]	WHITE	3	[Not Available]	[Not Available]	No	[Not Available]	WITH TUMOR	[Not Available]	3	Alive	0	[Not Applicable]	[Not Available]	[Not Available]	[Not Available]	[Not Available]	[Not Available]	[Not Available]	[Not Available]	[Not Available]	[Not Available]	[Not Available]	[Not Available]	[Not Available]	[Not Available]	0	[Not Available]	Preoperative	[Not Applicable]	[Not Available]	[Not Available]	[Not Available]	[Not Available]	[Not Available]	[Not Available]	Cervical Squamous Cell Carcinoma	[Not Available]	[Not Available]
129	D7A75BF5-5189-4978-99D9-FCEF91C9FBD2	TCGA-EK-A2R7	2011-12-02	NO	YES	-16487	FEMALE	Pre (<6 months since LMP AND no prior bilateral ovariectomy AND not on estrogen replacement)	165	75	Current User	WHITE	2	NOT HISPANIC OR LATINO	[Not Available]	No	[Not Available]	TUMOR FREE	[Not Available]	2	Alive	27	[Not Applicable]	[Not Available]	[Not Available]	[Not Available]	[Not Available]	[Not Available]	[Not Available]	[Not Available]	[Not Available]	[Not Available]	[Not Available]	[Not Available]	[Not Available]	[Not Available]	0	[Not Available]	Preoperative	[Not Applicable]	[Not Available]	[Not Available]	[Not Available]	[Not Available]	[Not Available]	[Not Available]	Cervical Squamous Cell Carcinoma	[Not Available]	[Not Available]
130	D4510801-8CE4-4F10-8B31-25C0A39B5135	TCGA-EK-A2R8	2011-12-02	NO	YES	-17692	FEMALE	Pre (<6 months since LMP AND no prior bilateral ovariectomy AND not on estrogen replacement)	170	75	[Not Available]	WHITE	5	NOT HISPANIC OR LATINO	[Not Available]	No	[Not Available]	WITH TUMOR	[Not Available]	5	Alive	40	[Not Applicable]	[Not Available]	[Not Available]	[Not Available]	[Not Available]	[Not Available]	[Not Available]	[Not Available]	[Not Available]	[Not Available]	[Not Available]	[Not Available]	[Not Available]	[Not Available]	0	[Not Available]	Preoperative	[Not Applicable]	[Not Available]	[Not Available]	[Not Available]	[Not Available]	[Not Available]	[Not Available]	Cervical Squamous Cell Carcinoma	[Not Available]	[Not Available]
131	00AD0FFE-2105-4829-A495-1C2ACEB5BB31	TCGA-EK-A2R9	2011-12-07	NO	YES	-21242	FEMALE	[Not Available]	162	185	[Not Available]	WHITE	[Not Available]	NOT HISPANIC OR LATINO	[Not Available]	No	[Not Available]	WITH TUMOR	[Not Available]	[Not Available]	Alive	4	[Not Applicable]	[Not Available]	[Not Available]	[Not Available]	[Not Available]	[Not Available]	[Not Available]	[Not Available]	[Not Available]	[Not Available]	[Not Available]	[Not Available]	[Not Available]	[Not Available]	0	[Not Available]	Preoperative	[Not Applicable]	[Not Available]	[Not Available]	[Not Available]	[Not Available]	[Not Available]	[Not Available]	Cervical Squamous Cell Carcinoma	[Not Available]	[Not Available]
132	ADA77320-FD05-4E43-BE72-864391044B35	TCGA-EK-A2RA	2012-01-04	NO	YES	-27209	FEMALE	[Not Available]	160	72	[Not Available]	[Not Available]	[Not Available]	HISPANIC OR LATINO	[Not Available]	No	[Not Available]	WITH TUMOR	[Not Available]	[Not Available]	Alive	302	[Not Applicable]	[Not Available]	[Not Available]	[Not Available]	[Not Available]	[Not Available]	[Not Available]	[Not Available]	41	4	2010	[Not Available]	[Not Available]	[Not Available]	0	[Not Available]	Preoperative	[Not Applicable]	[Not Available]	[Not Available]	[Not Available]	[Not Available]	[Not Available]	[Not Available]	Cervical Squamous Cell Carcinoma	[Not Available]	[Not Available]
133	F92A994D-B080-42C9-966F-34C1000865E3	TCGA-EK-A2RB	2011-12-07	NO	YES	-17752	FEMALE	[Not Available]	175	105	[Not Available]	WHITE	[Not Available]	NOT HISPANIC OR LATINO	[Not Available]	No	[Not Available]	TUMOR FREE	[Not Available]	[Not Available]	Alive	9	[Not Applicable]	[Not Available]	[Not Available]	[Not Available]	[Not Available]	[Not Available]	[Not Available]	[Not Available]	[Not Available]	2	[Not Available]	[Not Available]	[Not Available]	[Not Available]	0	[Not Available]	Other	post-op	[Not Available]	[Not Available]	[Not Available]	[Not Available]	[Not Available]	[Not Available]	Cervical Squamous Cell Carcinoma	[Not Available]	[Not Available]
134	AC0AE100-8072-47CC-81D9-8B52B1BF9236	TCGA-EK-A2RC	2011-12-07	NO	YES	-12353	FEMALE	[Not Available]	170	72	[Not Available]	[Not Available]	3	[Not Available]	[Not Available]	No	[Not Available]	TUMOR FREE	[Not Available]	4	Alive	129	[Not Applicable]	[Not Available]	[Not Available]	[Not Available]	[Not Available]	[Not Available]	[Not Available]	[Not Available]	[Not Available]	[Not Available]	[Not Available]	[Not Available]	[Not Available]	[Not Available]	0	[Not Available]	Preoperative	[Not Applicable]	[Not Available]	[Not Available]	[Not Available]	[Not Available]	[Not Available]	[Not Available]	Cervical Squamous Cell Carcinoma	[Not Available]	[Not Available]
135	16363EF7-899D-4927-A74B-E7C03B3D8AF1	TCGA-EK-A2RD	2011-12-05	NO	YES	-17191	FEMALE	Post (prior bilateral ovariectomy OR >12 mo since LMP with no prior hysterectomy)	161	114	[Not Available]	AMERICAN INDIAN OR ALASKA NATIVE	2	NOT HISPANIC OR LATINO	[Not Available]	No	[Not Available]	TUMOR FREE	[Not Available]	2	Alive	2	[Not Applicable]	[Not Available]	[Not Available]	[Not Available]	[Not Available]	[Not Available]	[Not Available]	[Not Available]	[Not Available]	[Not Available]	[Not Available]	[Not Available]	[Not Available]	[Not Available]	0	[Not Available]	Preoperative	[Not Applicable]	[Not Available]	[Not Available]	[Not Available]	[Not Available]	[Not Available]	[Not Available]	Cervical Squamous Cell Carcinoma	[Not Available]	[Not Available]
136	9AA36AC2-8418-4109-A3C1-63CA8742BAAB	TCGA-EK-A2RE	2011-12-05	NO	YES	-9743	FEMALE	Pre (<6 months since LMP AND no prior bilateral ovariectomy AND not on estrogen replacement)	161	54	[Not Available]	WHITE	[Not Available]	NOT HISPANIC OR LATINO	[Not Available]	No	[Not Available]	TUMOR FREE	[Not Available]	[Not Available]	Alive	57	[Not Applicable]	[Not Available]	[Not Available]	[Not Available]	[Not Available]	[Not Available]	[Not Available]	[Not Available]	[Not Available]	[Not Available]	[Not Available]	[Not Available]	[Not Available]	[Not Available]	0	[Not Available]	Preoperative	[Not Applicable]	[Not Available]	[Not Available]	[Not Available]	[Not Available]	[Not Available]	[Not Available]	Cervical Squamous Cell Carcinoma	[Not Available]	[Not Available]
137	CCD569E9-DCBE-4280-8C21-6BFE4CE60D7A	TCGA-EK-A2RJ	2011-12-02	NO	YES	-18664	FEMALE	[Not Available]	162	85	[Not Available]	WHITE	1	NOT HISPANIC OR LATINO	[Not Available]	No	[Not Available]	TUMOR FREE	[Not Available]	1	Alive	53	[Not Applicable]	[Not Available]	[Not Available]	[Not Available]	[Not Available]	[Not Available]	[Not Available]	[Not Available]	[Not Available]	[Not Available]	[Not Available]	[Not Available]	[Not Available]	[Not Available]	0	[Not Available]	Preoperative	[Not Applicable]	[Not Available]	[Not Available]	[Not Available]	[Not Available]	[Not Available]	[Not Available]	Cervical Squamous Cell Carcinoma	[Not Available]	[Not Available]
138	ACBFEB99-2B6B-4232-9AB5-A58549C6BC3A	TCGA-EK-A2RK	2011-12-02	NO	YES	-24541	FEMALE	Post (prior bilateral ovariectomy OR >12 mo since LMP with no prior hysterectomy)	165	101	[Not Available]	WHITE	1	NOT HISPANIC OR LATINO	[Not Available]	No	[Not Available]	[Not Available]	[Not Available]	2	Alive	13	[Not Applicable]	[Not Available]	[Not Available]	1	[Not Available]	[Not Available]	[Not Available]	[Not Available]	[Not Available]	[Not Available]	[Not Available]	[Not Available]	[Not Available]	[Not Available]	0	[Not Available]	Preoperative	[Not Applicable]	[Not Available]	[Not Available]	[Not Available]	[Not Available]	[Not Available]	[Not Available]	Cervical Squamous Cell Carcinoma	[Not Available]	[Not Available]
139	61EB08D0-EA01-45E7-884B-AC3D6070172A	TCGA-EK-A2RL	2011-12-01	NO	YES	-12047	FEMALE	[Not Available]	154	89	[Not Available]	BLACK OR AFRICAN AMERICAN	[Not Available]	NOT HISPANIC OR LATINO	[Not Available]	No	[Not Available]	TUMOR FREE	[Not Available]	[Not Available]	Alive	721	[Not Applicable]	[Not Available]	[Not Available]	[Not Available]	[Not Available]	[Not Available]	[Not Available]	[Not Available]	[Not Available]	[Not Available]	[Not Available]	[Not Available]	[Not Available]	[Not Available]	0	[Not Available]	Preoperative	[Not Applicable]	[Not Available]	[Not Available]	[Not Available]	[Not Available]	[Not Available]	[Not Available]	Endocervical Type of Adenocarcinoma	[Not Available]	[Not Available]
140	C13215D9-26A8-4C8B-B4FE-5DA6AA3222AF	TCGA-EK-A2RM	2011-12-01	NO	YES	-14842	FEMALE	[Not Available]	167	105	[Not Available]	WHITE	4	NOT HISPANIC OR LATINO	[Not Available]	No	[Not Available]	WITH TUMOR	[Not Available]	4	Alive	50	[Not Applicable]	[Not Available]	[Not Available]	[Not Available]	[Not Available]	[Not Available]	[Not Available]	[Not Available]	[Not Available]	[Not Available]	[Not Available]	[Not Available]	[Not Available]	[Not Available]	1	[Not Available]	Preoperative	[Not Applicable]	[Not Available]	[Not Available]	[Not Available]	[Not Available]	[Not Available]	[Not Available]	Cervical Squamous Cell Carcinoma	[Not Available]	[Not Available]
141	B610D391-0C9D-4114-94D6-5E4AA4270122	TCGA-EK-A2RN	2011-12-05	NO	YES	-16487	FEMALE	Post (prior bilateral ovariectomy OR >12 mo since LMP with no prior hysterectomy)	176	68	[Not Available]	WHITE	0	NOT HISPANIC OR LATINO	1	No	[Not Available]	WITH TUMOR	[Not Available]	1	Alive	71	[Not Applicable]	[Not Available]	[Not Available]	[Not Available]	[Not Available]	[Not Available]	[Not Available]	[Not Available]	[Not Available]	[Not Available]	[Not Available]	[Not Available]	[Not Available]	[Not Available]	0	[Not Available]	Preoperative	[Not Applicable]	[Not Available]	[Not Available]	[Not Available]	[Not Available]	[Not Available]	[Not Available]	Cervical Squamous Cell Carcinoma	[Not Available]	[Not Available]
142	C996CFFB-8132-4973-987D-143274B6A081	TCGA-EK-A2RO	2011-12-05	NO	YES	-21844	FEMALE	Post (prior bilateral ovariectomy OR >12 mo since LMP with no prior hysterectomy)	168	77	[Not Available]	AMERICAN INDIAN OR ALASKA NATIVE	[Not Available]	HISPANIC OR LATINO	[Not Available]	No	[Not Available]	WITH TUMOR	[Not Available]	[Not Available]	Alive	2	[Not Applicable]	[Not Available]	[Not Available]	[Not Available]	[Not Available]	[Not Available]	[Not Available]	[Not Available]	[Not Available]	[Not Available]	[Not Available]	[Not Available]	[Not Available]	[Not Available]	0	[Not Available]	Preoperative	[Not Applicable]	[Not Available]	[Not Available]	[Not Available]	[Not Available]	[Not Available]	[Not Available]	Cervical Squamous Cell Carcinoma	[Not Available]	[Not Available]
143	DEDA68DD-E9AD-45CC-9DBB-1C5836EF6519	TCGA-EK-A3GJ	2012-02-03	NO	YES	-18630	FEMALE	[Not Available]	171	96	[Not Available]	NATIVE HAWAIIAN OR OTHER PACIFIC ISLANDER	6	[Not Available]	[Not Available]	No	[Not Available]	[Discrepancy]	[Not Available]	10	Alive	3	[Not Applicable]	[Not Available]	[Not Available]	[Not Available]	[Not Available]	[Not Available]	[Not Available]	[Not Available]	[Not Available]	[Not Available]	[Not Available]	[Not Available]	[Not Available]	[Not Available]	1	[Not Available]	Preoperative	[Not Applicable]	[Not Available]	[Not Available]	[Not Available]	[Not Available]	[Not Available]	[Not Available]	Cervical Squamous Cell Carcinoma	[Not Available]	[Not Available]
144	D07D0A56-A25E-426B-8384-9D49E6545527	TCGA-EK-A3GK	2012-02-02	NO	YES	-12207	FEMALE	[Not Available]	165	73	Current User	WHITE	0	NOT HISPANIC OR LATINO	[Not Available]	No	[Not Available]	TUMOR FREE	[Not Available]	0	Alive	15	[Not Applicable]	[Not Available]	[Not Available]	[Not Available]	[Not Available]	[Not Available]	[Not Available]	[Not Available]	[Not Available]	[Not Available]	[Not Available]	[Not Available]	[Not Available]	[Not Available]	0	[Not Available]	Preoperative	[Not Applicable]	[Not Available]	[Not Available]	[Not Available]	[Not Available]	[Not Available]	[Not Available]	Endocervical Type of Adenocarcinoma	[Not Available]	[Not Available]
145	CB780C10-8810-4384-B829-954AAB1C16C8	TCGA-EK-A3GM	2012-02-02	NO	YES	-23879	FEMALE	Post (prior bilateral ovariectomy OR >12 mo since LMP with no prior hysterectomy)	150	83	[Not Available]	WHITE	10	HISPANIC OR LATINO	[Not Available]	No	[Not Available]	[Not Available]	[Not Available]	10	Alive	0	[Not Applicable]	[Not Available]	[Not Available]	[Not Available]	[Not Available]	[Not Available]	[Not Available]	[Not Available]	[Not Available]	1	[Not Available]	[Not Available]	[Not Available]	[Not Available]	0	[Not Available]	Preoperative	[Not Applicable]	[Not Available]	[Not Available]	[Not Available]	[Not Available]	[Not Available]	[Not Available]	Endocervical Type of Adenocarcinoma	[Not Available]	[Not Available]
146	F727FCB9-E457-4643-9468-F739133B7E9C	TCGA-EK-A3GN	2012-02-02	NO	YES	-17425	FEMALE	[Not Available]	160	83	[Not Available]	WHITE	[Not Available]	NOT HISPANIC OR LATINO	[Not Available]	No	[Not Available]	WITH TUMOR	[Not Available]	[Not Available]	Alive	1	[Not Applicable]	[Not Available]	[Not Available]	[Not Available]	[Not Available]	[Not Available]	[Not Available]	[Not Available]	[Not Available]	[Not Available]	[Not Available]	[Not Available]	[Not Available]	[Not Available]	1	[Not Available]	Preoperative	[Not Applicable]	[Not Available]	[Not Available]	[Not Available]	[Not Available]	[Not Available]	[Not Available]	Cervical Squamous Cell Carcinoma	[Not Available]	[Not Available]
147	6b74c07a-9932-4a80-8296-9db08d0c6964	TCGA-EX-A1H5	2011-04-21	YES	NO	-21338	FEMALE	Post (prior bilateral ovariectomy OR >12 mo since LMP with no prior hysterectomy)	167	67	Never Used	BLACK OR AFRICAN AMERICAN	4	NOT HISPANIC OR LATINO	[Not Available]	No	[Not Available]	TUMOR FREE	[Not Available]	4	Alive	178	[Not Applicable]	[Not Available]	[Not Available]	[Not Available]	[Not Available]	[Not Available]	[Not Available]	[Not Available]	33	2	[Not Available]	12	[Not Available]	[Not Available]	[Not Available]	[Not Available]	[Not Available]	[Not Applicable]	[Not Available]	[Not Available]	[Not Available]	[Not Available]	[Not Available]	[Not Available]	Cervical Squamous Cell Carcinoma	[Not Available]	[Not Available]
148	1FE594D9-4240-49EE-8AFD-C7D16A377181	TCGA-EX-A1H6	2012-06-25	NO	YES	-14214	FEMALE	Pre (<6 months since LMP AND no prior bilateral ovariectomy AND not on estrogen replacement)	158	74	Current User	WHITE	2	[Not Evaluated]	1	No	[Not Available]	TUMOR FREE	[Not Available]	3	Alive	241	[Not Applicable]	[Not Available]	[Not Available]	[Not Available]	[Not Available]	NO	[Not Available]	NO	[Not Available]	1	[Not Available]	[Not Available]	[Not Available]	[Not Available]	[Not Available]	[Not Available]	[Not Available]	[Not Applicable]	[Not Available]	[Not Available]	[Not Available]	Complete Remission/Response	[Not Available]	[Not Available]	Endocervical Type of Adenocarcinoma	[Not Available]	[Not Available]
149	F5D90810-8C4B-4CED-9360-383E42CB54B3	TCGA-EX-A3L1	2012-04-19	YES	NO	-11943	FEMALE	Pre (<6 months since LMP AND no prior bilateral ovariectomy AND not on estrogen replacement)	160	57	Current User	WHITE	3	NOT HISPANIC OR LATINO	[Not Available]	No	[Not Available]	TUMOR FREE	[Not Available]	3	Alive	211	[Not Applicable]	[Not Available]	[Not Available]	[Not Available]	[Not Available]	[Not Available]	[Not Available]	[Not Available]	[Not Available]	1	[Not Available]	[Not Available]	[Not Available]	[Not Available]	[Not Available]	[Not Available]	[Not Available]	[Not Applicable]	[Not Available]	[Not Available]	[Not Available]	[Not Available]	[Not Available]	[Not Available]	Cervical Squamous Cell Carcinoma	[Not Available]	[Not Available]
150	EB0EB159-732E-43FF-A402-7F2D9F67DAA8	TCGA-EX-A449	2012-11-01	YES	NO	-15559	FEMALE	Pre (<6 months since LMP AND no prior bilateral ovariectomy AND not on estrogen replacement)	168	107	[Not Available]	WHITE	1	NOT HISPANIC OR LATINO	1	No	[Not Available]	WITH TUMOR	1	3	Alive	34	[Not Applicable]	[Not Available]	[Not Available]	[Not Available]	[Not Available]	NO	[Not Available]	[Unknown]	[Not Available]	[Unknown]	[Not Available]	[Not Available]	[Not Available]	[Not Available]	[Not Available]	[Not Available]	[Not Available]	[Not Applicable]	[Not Available]	[Not Available]	[Not Available]	[Not Applicable]	[Not Available]	[Not Available]	Endocervical Type of Adenocarcinoma	[Not Available]	[Not Available]
151	6DCA2A6F-7F2C-4524-B528-396A889B2A3F	TCGA-EX-A69L	2013-06-19	YES	NO	-15121	FEMALE	Pre (<6 months since LMP AND no prior bilateral ovariectomy AND not on estrogen replacement)	163	73	Never Used	ASIAN	1	NOT HISPANIC OR LATINO	[Not Available]	No	[Not Available]	TUMOR FREE	[Not Available]	2	Alive	136	[Not Applicable]	[Not Available]	[Not Available]	1	[Not Available]	NO	[Not Available]	NO	[Not Available]	1	[Not Available]	[Not Available]	[Not Available]	[Not Available]	[Not Available]	[Not Available]	[Not Available]	[Not Applicable]	[Not Available]	[Not Available]	[Not Available]	Complete Remission/Response	[Not Available]	[Not Available]	Cervical Squamous Cell Carcinoma	[Not Available]	[Not Available]
152	1E4D7755-B971-4C6E-A2B9-DD83D92BC4C9	TCGA-EX-A69M	2013-06-19	YES	NO	-22917	FEMALE	Post (prior bilateral ovariectomy OR >12 mo since LMP with no prior hysterectomy)	158	58	Never Used	WHITE	3	[Not Evaluated]	[Not Available]	No	1	TUMOR FREE	[Not Available]	4	Alive	186	[Not Applicable]	[Not Available]	[Not Available]	[Not Available]	[Not Available]	NO	[Not Available]	NO	[Not Available]	4	2012	[Not Available]	[Not Available]	[Not Available]	1	[Not Available]	Preoperative	[Not Applicable]	[Not Available]	[Not Available]	[Not Available]	Complete Remission/Response	[Not Available]	[Not Available]	Cervical Squamous Cell Carcinoma	[Not Available]	[Not Available]
153	1DFB4565-81E1-4A1B-BB59-9B5629D6C447	TCGA-EX-A8YF	2014-03-13	YES	NO	-16258	FEMALE	Pre (<6 months since LMP AND no prior bilateral ovariectomy AND not on estrogen replacement)	168	57	[Not Available]	WHITE	2	[Not Evaluated]	[Not Available]	No	[Not Available]	TUMOR FREE	[Not Available]	3	Alive	144	[Not Applicable]	[Not Available]	[Not Available]	[Not Available]	[Not Available]	NO	[Not Available]	YES	[Not Available]	1	[Not Available]	[Not Available]	[Not Available]	[Not Available]	[Not Available]	[Not Available]	[Not Available]	[Not Applicable]	[Not Available]	[Not Available]	[Not Available]	Complete Remission/Response	[Not Available]	[Not Available]	Cervical Squamous Cell Carcinoma	[Not Available]	[Not Available]
154	85abfd69-cf72-43f6-a7dd-97056f22c91b	TCGA-FU-A23K	2011-07-18	NO	YES	-10551	FEMALE	Pre (<6 months since LMP AND no prior bilateral ovariectomy AND not on estrogen replacement)	165	91	[Not Available]	WHITE	2	[Not Available]	[Not Available]	No	[Not Available]	TUMOR FREE	[Not Available]	2	Alive	37	[Not Applicable]	[Not Available]	[Not Available]	[Not Available]	[Not Available]	[Not Available]	[Not Available]	[Not Available]	[Not Available]	1	[Not Available]	[Not Available]	[Not Available]	[Not Available]	[Not Available]	[Not Available]	[Not Available]	[Not Applicable]	[Not Available]	[Not Available]	[Not Available]	[Not Available]	[Not Available]	[Not Available]	Cervical Squamous Cell Carcinoma	[Not Available]	[Not Available]
155	86731af9-2d33-4521-9cf9-5f6152ca15d7	TCGA-FU-A23L	2011-07-18	NO	YES	-21962	FEMALE	Post (prior bilateral ovariectomy OR >12 mo since LMP with no prior hysterectomy)	163	56	[Not Available]	WHITE	4	[Not Available]	[Not Available]	No	[Not Available]	[Not Available]	[Not Available]	[Not Available]	Alive	37	[Not Applicable]	[Not Available]	[Not Available]	[Not Available]	[Not Available]	[Not Available]	[Not Available]	[Not Available]	[Not Available]	1	[Not Available]	[Not Available]	[Not Available]	[Not Available]	[Not Available]	[Not Available]	[Not Available]	[Not Applicable]	[Not Available]	[Not Available]	[Not Available]	[Not Available]	[Not Available]	[Not Available]	Cervical Squamous Cell Carcinoma	[Not Available]	[Not Available]
156	D5D8A818-D689-4C6F-96B0-13F2CB10C3CA	TCGA-FU-A2QG	2011-10-18	YES	NO	-10865	FEMALE	Peri (6-12 months since last menstrual period)	170	138	Former User	WHITE	1	NOT HISPANIC OR LATINO	0	No	0	TUMOR FREE	0	1	Alive	28	[Not Applicable]	[Not Available]	[Not Available]	0	[Not Available]	[Not Available]	[Not Available]	[Not Available]	14	4	2011	15	[Not Available]	[Not Available]	1	[Not Available]	Preoperative	[Not Applicable]	[Not Available]	[Not Available]	[Not Available]	[Not Available]	[Not Available]	[Not Available]	Cervical Squamous Cell Carcinoma	[Not Available]	[Not Available]
157	B7F2958F-256E-4C30-9C61-11E76DDB36BA	TCGA-FU-A3EO	2012-02-15	YES	NO	-20207	FEMALE	Post (prior bilateral ovariectomy OR >12 mo since LMP with no prior hysterectomy)	165	64	Former User	WHITE	2	NOT HISPANIC OR LATINO	0	No	0	TUMOR FREE	0	2	Alive	66	[Not Applicable]	[Not Available]	[Not Available]	0	[Not Available]	[Not Available]	[Not Available]	[Not Available]	15	2	[Not Available]	40	[Not Available]	[Not Available]	1	[Not Available]	Preoperative	[Not Applicable]	[Not Available]	[Not Available]	[Not Available]	[Not Available]	[Not Available]	[Not Available]	Endocervical Type of Adenocarcinoma	[Not Available]	[Not Available]
158	674E010C-7AD4-4DC2-86B0-284CD4560633	TCGA-FU-A3HY	2012-04-16	YES	NO	-17228	FEMALE	Pre (<6 months since LMP AND no prior bilateral ovariectomy AND not on estrogen replacement)	170	74	Former User	WHITE	6	NOT HISPANIC OR LATINO	0	No	0	TUMOR FREE	0	6	Alive	20	[Not Applicable]	[Not Available]	[Not Available]	0	[Not Available]	[Not Available]	[Not Available]	[Not Available]	16	2	[Not Available]	5	[Not Available]	[Not Available]	[Not Available]	[Not Available]	[Not Available]	[Not Applicable]	[Not Available]	[Not Available]	[Not Available]	[Not Available]	[Not Available]	[Not Available]	Cervical Squamous Cell Carcinoma	[Not Available]	[Not Available]
159	6FF12A54-10DA-4941-BFEA-7B66E19B4BE9	TCGA-FU-A3HZ	2012-04-16	NO	YES	-23565	FEMALE	Post (prior bilateral ovariectomy OR >12 mo since LMP with no prior hysterectomy)	165	66	[Not Available]	WHITE	0	NOT HISPANIC OR LATINO	0	No	0	TUMOR FREE	0	0	Alive	31	[Not Applicable]	[Not Available]	[Not Available]	0	[Not Available]	[Not Available]	[Not Available]	[Not Available]	[Not Available]	1	[Not Available]	[Not Available]	[Not Available]	[Not Available]	[Not Available]	[Not Available]	[Not Available]	[Not Applicable]	[Not Available]	[Not Available]	[Not Available]	[Not Available]	[Not Available]	[Not Available]	Cervical Squamous Cell Carcinoma	[Not Available]	[Not Available]
160	DAC27C24-CDBF-4527-9214-178FDE3D098A	TCGA-FU-A3NI	2012-04-17	NO	YES	-16533	FEMALE	Pre (<6 months since LMP AND no prior bilateral ovariectomy AND not on estrogen replacement)	162	57	[Not Available]	WHITE	2	NOT HISPANIC OR LATINO	[Not Available]	No	[Not Available]	TUMOR FREE	[Not Available]	[Not Available]	Alive	44	[Not Applicable]	[Not Available]	[Not Available]	[Not Available]	[Not Available]	[Not Available]	[Not Available]	[Not Available]	[Not Available]	2	[Not Available]	[Not Available]	[Not Available]	[Not Available]	[Not Available]	[Not Available]	[Not Available]	[Not Applicable]	[Not Available]	[Not Available]	[Not Available]	[Not Available]	[Not Available]	[Not Available]	Cervical Squamous Cell Carcinoma	[Not Available]	[Not Available]
161	7218AA6F-3345-484F-A329-A3B6169A67C7	TCGA-FU-A3TQ	2012-08-06	NO	YES	-20302	FEMALE	Post (prior bilateral ovariectomy OR >12 mo since LMP with no prior hysterectomy)	152	59	[Unknown]	WHITE	3	NOT HISPANIC OR LATINO	0	No	0	TUMOR FREE	0	3	Alive	48	[Not Applicable]	[Not Available]	[Not Available]	0	[Not Available]	NO	[Not Available]	[Unknown]	30	2	[Not Available]	50	[Not Available]	[Not Available]	[Not Available]	[Not Available]	[Not Available]	[Not Applicable]	[Not Available]	[Not Available]	[Not Available]	[Not Available]	[Not Available]	[Not Available]	Cervical Squamous Cell Carcinoma	[Not Available]	[Not Available]
162	B75644C2-B515-41CE-9B03-842EF5208A17	TCGA-FU-A3TX	2012-08-06	YES	NO	-28825	FEMALE	Post (prior bilateral ovariectomy OR >12 mo since LMP with no prior hysterectomy)	[Not Available]	67	[Not Available]	[Not Evaluated]	3	[Not Evaluated]	[Not Available]	No	[Not Available]	[Unknown]	[Not Available]	3	Alive	45	[Not Applicable]	[Not Available]	[Not Available]	[Not Available]	[Not Available]	NO	[Not Available]	[Unknown]	20	4	1993	[Not Available]	[Unknown]	[Not Available]	[Not Available]	[Not Available]	[Not Available]	[Not Applicable]	[Not Available]	[Not Available]	[Not Available]	[Unknown]	[Not Available]	[Not Available]	Cervical Squamous Cell Carcinoma	[Not Available]	[Not Available]
163	6868BA1D-B612-454C-8146-74AF2F573D76	TCGA-FU-A3WB	2012-09-24	YES	NO	-15833	FEMALE	[Unknown]	167	89	Former User	WHITE	1	NOT HISPANIC OR LATINO	[Not Available]	No	[Not Available]	TUMOR FREE	[Not Available]	3	Alive	25	[Not Applicable]	[Not Available]	[Not Available]	[Not Available]	[Not Available]	NO	[Not Available]	[Unknown]	16	4	2012	25	[Not Available]	[Not Available]	2	[Not Available]	Preoperative	[Not Applicable]	[Not Available]	[Not Available]	[Not Available]	Complete Remission/Response	[Not Available]	[Not Available]	Cervical Squamous Cell Carcinoma	[Not Available]	[Not Available]
164	6E01248B-C551-4F52-8066-CB2D26EB6394	TCGA-FU-A3YQ	2012-10-04	YES	NO	-12816	FEMALE	Pre (<6 months since LMP AND no prior bilateral ovariectomy AND not on estrogen replacement)	160	101	Former User	WHITE	3	NOT HISPANIC OR LATINO	[Not Available]	No	[Not Available]	[Unknown]	[Not Available]	4	Alive	107	[Not Applicable]	[Not Available]	[Not Available]	1	[Not Available]	NO	[Not Available]	[Unknown]	23	2	[Not Available]	10	[Not Available]	[Not Available]	[Not Available]	[Not Available]	[Not Available]	[Not Applicable]	[Not Available]	[Not Available]	[Not Available]	[Not Available]	[Not Available]	[Not Available]	Cervical Squamous Cell Carcinoma	[Not Available]	[Not Available]
165	63DCFA32-C69E-45AD-BEA3-AE672ACB11C6	TCGA-FU-A40J	2012-10-04	YES	NO	-14182	FEMALE	Pre (<6 months since LMP AND no prior bilateral ovariectomy AND not on estrogen replacement)	160	78	[Unknown]	WHITE	3	NOT HISPANIC OR LATINO	[Not Available]	No	[Not Available]	TUMOR FREE	[Not Available]	3	Alive	41	[Not Applicable]	[Not Available]	[Not Available]	[Not Available]	[Not Available]	NO	[Not Available]	[Unknown]	[Not Available]	1	[Not Available]	[Not Available]	[Not Available]	[Not Available]	[Not Available]	[Not Available]	[Not Available]	[Not Applicable]	[Not Available]	[Not Available]	[Not Available]	[Not Available]	[Not Available]	[Not Available]	Endocervical Type of Adenocarcinoma	[Not Available]	[Not Available]
166	968BD652-786C-4DDB-A937-DC480CB821FC	TCGA-FU-A57G	2013-05-31	YES	NO	-17905	FEMALE	Pre (<6 months since LMP AND no prior bilateral ovariectomy AND not on estrogen replacement)	160	57	Former User	WHITE	2	NOT HISPANIC OR LATINO	[Not Available]	No	[Not Available]	TUMOR FREE	[Not Available]	3	Alive	40	[Not Applicable]	[Not Available]	[Not Available]	1	[Not Available]	NO	[Not Available]	[Unknown]	[Not Available]	1	[Not Available]	[Not Available]	[Unknown]	[Not Available]	1	[Not Available]	Preoperative	[Not Applicable]	[Not Available]	[Not Available]	[Not Available]	[Unknown]	[Not Available]	[Not Available]	Endocervical Type of Adenocarcinoma	[Not Available]	[Not Available]
167	9DBA5A81-3587-4F5A-8D19-E0B0AED0A677	TCGA-FU-A5XV	2013-07-12	YES	NO	-11692	FEMALE	Pre (<6 months since LMP AND no prior bilateral ovariectomy AND not on estrogen replacement)	157	69	[Unknown]	WHITE	2	NOT HISPANIC OR LATINO	[Not Available]	No	1	[Unknown]	[Not Available]	[Not Available]	Alive	60	[Not Applicable]	[Not Available]	[Not Available]	[Not Available]	[Not Available]	NO	[Not Available]	[Unknown]	14	2	[Not Available]	18	[Unknown]	[Not Available]	1	[Not Available]	Preoperative	[Not Applicable]	[Not Available]	[Not Available]	[Not Available]	[Unknown]	[Not Available]	[Not Available]	Cervical Squamous Cell Carcinoma	[Not Available]	[Not Available]
168	128FD280-9A04-4038-9269-9A945B9A4DC9	TCGA-FU-A770	2014-02-26	YES	NO	-12248	FEMALE	Pre (<6 months since LMP AND no prior bilateral ovariectomy AND not on estrogen replacement)	175	67	Former User	WHITE	1	NOT HISPANIC OR LATINO	0	No	0	TUMOR FREE	0	2	Alive	34	[Not Applicable]	[Not Available]	[Not Available]	1	[Not Available]	NO	[Not Available]	[Unknown]	16	2	[Not Available]	7	[Unknown]	[Not Available]	1	[Not Available]	Preoperative	[Not Applicable]	[Not Available]	[Not Available]	[Not Available]	[Unknown]	[Not Available]	[Not Available]	Endocervical Adenocarcinoma of the Usual Type	[Not Available]	[Not Available]
169	67195401-9099-4CA9-9790-F42BCB815289	TCGA-GH-A9DA	2014-05-07	YES	NO	-10160	FEMALE	[Not Evaluated]	170	[Not Available]	[Unknown]	WHITE	3	NOT HISPANIC OR LATINO	[Not Available]	No	[Not Available]	TUMOR FREE	[Not Available]	5	Alive	274	[Not Applicable]	[Not Available]	[Not Available]	2	[Not Available]	NO	[Not Available]	NO	14	2	[Not Available]	6.5	[Not Available]	[Not Available]	[Not Available]	[Not Available]	[Not Available]	[Not Applicable]	[Not Available]	[Not Available]	[Not Available]	Complete Remission/Response	[Not Available]	[Not Available]	Cervical Squamous Cell Carcinoma	[Not Available]	[Not Available]
170	E2FF7CFD-A101-45B9-895F-26F403E7BDFB	TCGA-HG-A2PA	2011-12-23	NO	YES	-14025	FEMALE	Pre (<6 months since LMP AND no prior bilateral ovariectomy AND not on estrogen replacement)	164	95	[Not Available]	WHITE	4	NOT HISPANIC OR LATINO	0	No	0	WITH TUMOR	0	5	Alive	773	[Not Applicable]	[Not Available]	[Not Available]	1	[Not Available]	[Not Available]	[Not Available]	[Not Available]	[Not Available]	2	[Not Available]	[Not Available]	[Not Available]	[Not Available]	0	[Not Available]	Preoperative	[Not Applicable]	[Not Available]	[Not Available]	[Not Available]	[Not Available]	[Not Available]	[Not Available]	Cervical Squamous Cell Carcinoma	[Not Available]	[Not Available]
171	CF87812F-6DB6-4592-9842-C62B3E4FF03F	TCGA-HG-A9SC	2014-06-19	NO	YES	-17963	FEMALE	Pre (<6 months since LMP AND no prior bilateral ovariectomy AND not on estrogen replacement)	173	68	Former User	WHITE	[Not Available]	NOT HISPANIC OR LATINO	[Not Available]	No	[Not Available]	TUMOR FREE	[Not Available]	0	Alive	217	[Not Applicable]	[Not Available]	[Not Available]	[Not Available]	[Not Available]	[Not Available]	[Not Available]	YES	[Not Available]	1	[Not Available]	[Not Available]	[Not Available]	[Not Available]	0	[Not Available]	Preoperative	[Not Applicable]	[Not Available]	[Not Available]	[Not Available]	Complete Remission/Response	[Not Available]	[Not Available]	Adenosquamous	[Not Available]	[Not Available]
172	F150D999-CDEC-427E-B8B2-00731C648989	TCGA-HM-A3JJ	2013-03-12	YES	NO	-14736	FEMALE	Pre (<6 months since LMP AND no prior bilateral ovariectomy AND not on estrogen replacement)	173	72	Former User	BLACK OR AFRICAN AMERICAN	5	NOT HISPANIC OR LATINO	1	No	[Not Available]	WITH TUMOR	[Not Available]	6	Dead	[Not Available]	659	[Not Available]	[Not Available]	[Not Available]	[Not Available]	[Not Available]	[Not Available]	[Not Available]	[Not Available]	[Not Available]	[Not Available]	[Not Available]	[Not Available]	[Not Available]	0	[Not Available]	Preoperative	[Not Applicable]	[Not Available]	[Not Available]	[Not Available]	[Not Available]	[Not Available]	[Not Available]	Cervical Squamous Cell Carcinoma	[Not Available]	[Not Available]
173	7C4CD55F-750E-4941-A9F3-0632A75D6531	TCGA-HM-A3JK	2012-02-17	YES	NO	-23618	FEMALE	Post (prior bilateral ovariectomy OR >12 mo since LMP with no prior hysterectomy)	165	94	Never Used	WHITE	0	NOT HISPANIC OR LATINO	0	No	0	TUMOR FREE	0	0	Alive	168	[Not Applicable]	[Not Available]	[Not Available]	0	[Not Available]	[Not Available]	[Not Available]	[Not Available]	[Not Available]	4	2008	[Not Available]	[Not Available]	[Not Available]	0	[Not Available]	Preoperative	[Not Applicable]	[Not Available]	[Not Available]	[Not Available]	[Not Available]	[Not Available]	[Not Available]	Cervical Squamous Cell Carcinoma	[Not Available]	[Not Available]
174	6BCF8B41-7ABC-4B6F-899A-1F67B4ADA765	TCGA-HM-A4S6	2013-02-27	YES	NO	-18903	FEMALE	Pre (<6 months since LMP AND no prior bilateral ovariectomy AND not on estrogen replacement)	152	101	Former User	WHITE	5	NOT HISPANIC OR LATINO	[Not Available]	No	[Not Available]	TUMOR FREE	[Not Available]	6	Alive	244	[Not Applicable]	[Not Available]	[Not Available]	1	[Not Available]	NO	[Not Available]	YES	14	3	1995	10	[Not Available]	[Not Available]	0	[Not Available]	Preoperative	[Not Applicable]	[Not Available]	[Not Available]	[Not Available]	[Not Applicable]	[Not Available]	[Not Available]	Cervical Squamous Cell Carcinoma	[Not Available]	[Not Available]
175	929505F7-0270-475E-A9D6-00BF38DC78BA	TCGA-HM-A6W2	2013-10-18	YES	NO	-12775	FEMALE	Pre (<6 months since LMP AND no prior bilateral ovariectomy AND not on estrogen replacement)	160	89	Former User	BLACK OR AFRICAN AMERICAN	2	NOT HISPANIC OR LATINO	[Not Available]	No	[Not Available]	[Unknown]	[Not Available]	2	Alive	125	[Not Applicable]	[Not Available]	[Not Available]	[Not Available]	[Not Available]	NO	[Not Available]	YES	27	2	[Not Available]	8	[Not Available]	[Not Available]	0	[Not Available]	Preoperative	[Not Applicable]	[Not Available]	[Not Available]	[Not Available]	[Not Applicable]	[Not Available]	[Not Available]	Adenosquamous	[Not Available]	[Not Available]
176	66229DD6-C771-4455-A90C-C66FB40CF7FE	TCGA-IR-A3L7	2012-04-13	NO	YES	-13559	FEMALE	Pre (<6 months since LMP AND no prior bilateral ovariectomy AND not on estrogen replacement)	177	89	Former User	WHITE	3	[Not Available]	0	No	0	TUMOR FREE	0	3	Alive	3509	[Not Applicable]	[Not Available]	[Not Available]	0	[Not Available]	[Not Available]	[Not Available]	[Not Available]	17	4	1990	10	[Not Available]	[Not Available]	[Not Available]	[Not Available]	[Not Available]	[Not Applicable]	[Not Available]	[Not Available]	[Not Available]	[Not Available]	[Not Available]	[Not Available]	Cervical Squamous Cell Carcinoma	[Not Available]	[Not Available]
177	7B8C04D7-824D-493D-8F2C-9ED87A907192	TCGA-IR-A3LA	2013-01-24	NO	YES	-21949	FEMALE	Post (prior bilateral ovariectomy OR >12 mo since LMP with no prior hysterectomy)	157	101	Never Used	WHITE	0	[Not Evaluated]	[Not Available]	No	[Not Available]	TUMOR FREE	[Not Available]	2	Alive	3780	[Not Applicable]	[Not Available]	[Not Available]	[Not Available]	[Not Available]	NO	[Not Available]	YES	[Not Available]	1	[Not Available]	[Not Available]	[Not Available]	[Not Available]	[Not Available]	[Not Available]	[Not Available]	[Not Applicable]	[Not Available]	[Not Available]	[Not Available]	Complete Remission/Response	[Not Available]	[Not Available]	Endometrioid Adenocarcinoma of Endocervix	[Not Available]	[Not Available]
178	E7C7783C-1D0F-4F42-A4CF-518825E91D91	TCGA-IR-A3LB	2013-01-24	NO	YES	-19374	FEMALE	Post (prior bilateral ovariectomy OR >12 mo since LMP with no prior hysterectomy)	168	94	Never Used	WHITE	2	NOT HISPANIC OR LATINO	[Not Available]	No	[Not Available]	WITH TUMOR	[Not Available]	4	Dead	[Not Available]	2032	[Unknown]	[Not Available]	[Not Available]	[Not Available]	NO	[Not Available]	YES	17	3	1972	2.5	[Not Available]	[Not Available]	[Not Available]	[Not Available]	[Not Available]	[Not Applicable]	[Not Available]	[Not Available]	[Not Available]	Complete Remission/Response	[Not Available]	[Not Available]	Endocervical Type of Adenocarcinoma	[Not Available]	[Not Available]
179	58BDCACE-0047-456E-A225-68953EDAFE5E	TCGA-IR-A3LC	2012-04-13	NO	YES	-14697	FEMALE	Pre (<6 months since LMP AND no prior bilateral ovariectomy AND not on estrogen replacement)	160	64	Current User	WHITE	3	[Not Available]	0	No	0	TUMOR FREE	0	3	Alive	3333	[Not Applicable]	[Not Available]	[Not Available]	0	[Not Available]	[Not Available]	[Not Available]	[Not Available]	[Not Available]	1	[Not Available]	[Not Available]	[Not Available]	[Not Available]	[Not Available]	[Not Available]	[Not Available]	[Not Applicable]	[Not Available]	[Not Available]	[Not Available]	[Not Available]	[Not Available]	[Not Available]	Cervical Squamous Cell Carcinoma	[Not Available]	[Not Available]
180	785DDEA1-399D-47D8-B2B0-39E95EAA24B5	TCGA-IR-A3LF	2013-01-24	NO	YES	-23721	FEMALE	Post (prior bilateral ovariectomy OR >12 mo since LMP with no prior hysterectomy)	155	86	Never Used	WHITE	2	[Not Evaluated]	0	No	0	TUMOR FREE	0	3	Alive	2949	[Not Applicable]	[Not Available]	[Not Available]	1	[Not Available]	NO	[Not Available]	YES	[Not Available]	1	[Not Available]	[Not Available]	[Not Available]	[Not Available]	[Not Available]	[Not Available]	[Not Available]	[Not Applicable]	[Not Available]	[Not Available]	[Not Available]	Complete Remission/Response	[Not Available]	[Not Available]	Endocervical Adenocarcinoma of the Usual Type	[Not Available]	[Not Available]
181	F24ED9C0-92BB-4003-86D2-42AB26617A05	TCGA-IR-A3LH	2012-04-13	NO	YES	-18118	FEMALE	Pre (<6 months since LMP AND no prior bilateral ovariectomy AND not on estrogen replacement)	154	74	Former User	BLACK OR AFRICAN AMERICAN	1	[Not Available]	0	No	1	TUMOR FREE	0	2	Alive	2394	[Not Applicable]	[Not Available]	[Not Available]	0	[Not Available]	[Not Available]	[Not Available]	[Not Available]	24	4	2000	20	[Not Available]	[Not Available]	[Not Available]	[Not Available]	[Not Available]	[Not Applicable]	[Not Available]	[Not Available]	[Not Available]	[Not Available]	[Not Available]	[Not Available]	Cervical Squamous Cell Carcinoma	[Not Available]	[Not Available]
182	75BC22D8-738D-45F8-B6C0-C664F5FEF47C	TCGA-IR-A3LI	2012-04-13	NO	YES	-17741	FEMALE	Peri (6-12 months since last menstrual period)	169	71	Never Used	WHITE	2	[Not Available]	2	No	0	TUMOR FREE	0	4	Alive	2445	[Not Applicable]	[Not Available]	[Not Available]	0	[Not Available]	[Not Available]	[Not Available]	[Not Available]	[Not Available]	1	[Not Available]	[Not Available]	[Not Available]	[Not Available]	[Not Available]	[Not Available]	[Not Available]	[Not Applicable]	[Not Available]	[Not Available]	[Not Available]	[Not Available]	[Not Available]	[Not Available]	Endocervical Type of Adenocarcinoma	[Not Available]	[Not Available]
183	B79558C5-1DB2-4B1E-A7B8-EFBD19AA855E	TCGA-IR-A3LK	2012-04-13	NO	YES	-25440	FEMALE	Post (prior bilateral ovariectomy OR >12 mo since LMP with no prior hysterectomy)	165	96	Never Used	WHITE	1	[Not Available]	0	No	0	WITH TUMOR	0	1	Alive	808	[Not Applicable]	[Not Available]	[Not Available]	0	[Not Available]	[Not Available]	[Not Available]	[Not Available]	[Not Available]	1	[Not Available]	[Not Available]	[Not Available]	[Not Available]	[Not Available]	[Not Available]	[Not Available]	[Not Applicable]	[Not Available]	[Not Available]	[Not Available]	[Not Available]	[Not Available]	[Not Available]	Cervical Squamous Cell Carcinoma	[Not Available]	[Not Available]
184	7C4AB1CA-4BDD-4EF7-9A42-F6C0C7136D26	TCGA-IR-A3LL	2012-04-13	NO	YES	-22123	FEMALE	Post (prior bilateral ovariectomy OR >12 mo since LMP with no prior hysterectomy)	157	92	[Not Available]	WHITE	2	[Not Available]	0	No	0	TUMOR FREE	0	2	Alive	720	[Not Applicable]	[Not Available]	[Not Available]	0	[Not Available]	[Not Available]	[Not Available]	[Not Available]	[Not Available]	1	[Not Available]	[Not Available]	[Not Available]	[Not Available]	[Not Available]	[Not Available]	[Not Available]	[Not Applicable]	[Not Available]	[Not Available]	[Not Available]	[Not Available]	[Not Available]	[Not Available]	Cervical Squamous Cell Carcinoma	[Not Available]	[Not Available]
185	0BD52D75-5113-4EF1-BC75-509F59EAEF2B	TCGA-JW-A5VG	2013-06-03	NO	YES	-13109	FEMALE	Pre (<6 months since LMP AND no prior bilateral ovariectomy AND not on estrogen replacement)	158	110	Never Used	AMERICAN INDIAN OR ALASKA NATIVE	5	HISPANIC OR LATINO	0	No	0	TUMOR FREE	0	5	Alive	439	[Not Applicable]	[Not Available]	[Not Available]	0	[Not Available]	NO	[Not Available]	NO	[Not Available]	1	[Not Available]	[Not Available]	[Not Available]	[Not Available]	0	[Not Available]	Post-Adjuvant Therapy	[Not Applicable]	[Not Available]	[Not Available]	[Not Available]	Complete Remission/Response	[Not Available]	[Not Available]	Cervical Squamous Cell Carcinoma	[Not Available]	[Not Available]
186	6813C53C-B256-4115-AD90-24D75328779E	TCGA-JW-A5VH	2013-05-31	NO	YES	-19423	FEMALE	Pre (<6 months since LMP AND no prior bilateral ovariectomy AND not on estrogen replacement)	163	80	[Unknown]	AMERICAN INDIAN OR ALASKA NATIVE	2	HISPANIC OR LATINO	0	No	0	WITH TUMOR	0	2	Dead	[Not Available]	100	Cervical Cancer	[Not Available]	0	[Not Available]	NO	[Not Available]	NO	[Not Available]	1	[Not Available]	[Not Available]	[Not Available]	[Not Available]	2	[Not Available]	Other	N/A	[Not Available]	[Not Available]	[Not Available]	Progressive Disease	[Not Available]	[Not Available]	Cervical Squamous Cell Carcinoma	[Not Available]	[Not Available]
187	53EB4C4E-0719-476F-9B2B-279D438D7710	TCGA-JW-A5VI	2013-06-03	NO	YES	-16444	FEMALE	Pre (<6 months since LMP AND no prior bilateral ovariectomy AND not on estrogen replacement)	158	59	Former User	AMERICAN INDIAN OR ALASKA NATIVE	2	HISPANIC OR LATINO	0	No	0	WITH TUMOR	0	2	Alive	506	[Not Applicable]	[Not Available]	[Not Available]	0	[Not Available]	NO	[Not Available]	NO	26	2	[Not Available]	10	[Not Available]	[Not Available]	1	[Not Available]	Other	[Not Available]	[Not Available]	[Not Available]	[Not Available]	Complete Remission/Response	[Not Available]	[Not Available]	Cervical Squamous Cell Carcinoma	[Not Available]	[Not Available]
188	F0BB0D18-1190-463D-A0BA-839C2C776794	TCGA-JW-A5VJ	2013-06-03	YES	NO	-20714	FEMALE	Post (prior bilateral ovariectomy OR >12 mo since LMP with no prior hysterectomy)	155	57	Never Used	AMERICAN INDIAN OR ALASKA NATIVE	2	HISPANIC OR LATINO	0	No	1	WITH TUMOR	0	3	Alive	401	[Not Applicable]	[Not Available]	[Not Available]	0	[Not Available]	NO	[Not Available]	NO	[Not Available]	1	[Not Available]	[Not Available]	[Not Available]	[Not Available]	2	[Not Available]	[Not Available]	[Not Applicable]	[Not Available]	[Not Available]	[Not Available]	Progressive Disease	[Not Available]	[Not Available]	Cervical Squamous Cell Carcinoma	[Not Available]	[Not Available]
189	BBB96B5A-80E8-4542-80B4-2444CF1FE51E	TCGA-JW-A5VK	2013-05-31	YES	NO	-15965	FEMALE	Pre (<6 months since LMP AND no prior bilateral ovariectomy AND not on estrogen replacement)	158	68	Never Used	BLACK OR AFRICAN AMERICAN	1	NOT HISPANIC OR LATINO	0	No	0	TUMOR FREE	0	1	Alive	198	[Not Applicable]	[Not Available]	[Not Available]	0	[Not Available]	NO	[Not Available]	NO	33	3	[Not Available]	1	[Not Available]	[Not Available]	1	[Not Available]	[Not Available]	[Not Applicable]	[Not Available]	[Not Available]	[Not Available]	Complete Remission/Response	[Not Available]	[Not Available]	Cervical Squamous Cell Carcinoma	[Not Available]	[Not Available]
190	D1A5B028-EC79-456B-81A1-69838E2922DF	TCGA-JW-A5VL	2013-05-31	YES	NO	-13604	FEMALE	Pre (<6 months since LMP AND no prior bilateral ovariectomy AND not on estrogen replacement)	160	71	[Unknown]	AMERICAN INDIAN OR ALASKA NATIVE	2	HISPANIC OR LATINO	0	No	0	TUMOR FREE	0	2	Alive	88	[Not Applicable]	[Not Available]	[Not Available]	0	[Not Available]	NO	[Not Available]	NO	[Not Available]	1	[Not Available]	[Not Available]	[Not Available]	[Not Available]	1	[Not Available]	Other	N/A	[Not Available]	[Not Available]	[Not Available]	Complete Remission/Response	[Not Available]	[Not Available]	Cervical Squamous Cell Carcinoma	[Not Available]	[Not Available]
191	FB4AF6B2-4BED-4DBE-9309-29F59ED30FB2	TCGA-JW-A69B	2014-02-10	YES	NO	-16080	FEMALE	Pre (<6 months since LMP AND no prior bilateral ovariectomy AND not on estrogen replacement)	155	69	Never Used	WHITE	3	HISPANIC OR LATINO	0	No	0	TUMOR FREE	0	4	Alive	306	[Not Applicable]	[Not Available]	[Not Available]	1	[Not Available]	NO	[Not Available]	NO	[Not Available]	1	[Not Available]	[Not Available]	[Not Available]	[Not Available]	1	[Not Available]	Preoperative	[Not Applicable]	[Not Available]	[Not Available]	[Not Available]	Complete Remission/Response	[Not Available]	[Not Available]	Endocervical Type of Adenocarcinoma	[Not Available]	[Not Available]
192	7CC8F5BD-D2D3-44E9-AFF6-FE9C9C805938	TCGA-JW-A852	2014-02-12	YES	NO	-15682	FEMALE	Pre (<6 months since LMP AND no prior bilateral ovariectomy AND not on estrogen replacement)	160	100	[Not Available]	WHITE	3	HISPANIC OR LATINO	0	No	0	[Unknown]	0	3	Alive	156	[Not Applicable]	[Not Available]	[Not Available]	0	[Not Available]	NO	[Not Available]	NO	[Not Available]	1	[Not Available]	[Not Available]	[Not Available]	[Not Available]	1	[Not Available]	Pre-Adjuvant Therapy	[Not Applicable]	[Not Available]	[Not Available]	[Not Available]	Complete Remission/Response	[Not Available]	[Not Available]	Cervical Squamous Cell Carcinoma	[Not Available]	[Not Available]
193	1C0B5C18-8760-4483-A88C-1D1D89F61998	TCGA-JW-AAVH	2014-04-03	YES	NO	-16894	FEMALE	Pre (<6 months since LMP AND no prior bilateral ovariectomy AND not on estrogen replacement)	155	165	[Unknown]	WHITE	4	HISPANIC OR LATINO	[Not Available]	No	[Not Available]	TUMOR FREE	[Not Available]	10	Alive	204	[Not Applicable]	[Not Available]	[Not Available]	6	[Not Available]	NO	[Not Available]	NO	16	2	[Not Available]	20	[Not Available]	[Not Available]	2	[Not Available]	Pre-Adjuvant Therapy	[Not Applicable]	[Not Available]	[Not Available]	[Not Available]	[Not Applicable]	[Not Available]	[Not Available]	Cervical Squamous Cell Carcinoma	[Not Available]	[Not Available]
194	3DF6ABE2-2123-4BFA-A4E4-88DF5F940C04	TCGA-JX-A3PZ	2014-04-17	NO	YES	-9303	FEMALE	Pre (<6 months since LMP AND no prior bilateral ovariectomy AND not on estrogen replacement)	175	58	Never Used	WHITE	0	[Unknown]	0	No	0	WITH TUMOR	0	0	Dead	[Not Available]	642	Cervical Cancer	[Not Available]	0	[Not Available]	NO	[Not Available]	NO	[Not Available]	1	[Not Available]	[Not Available]	[Not Available]	[Not Available]	0	[Not Available]	Pre-Adjuvant Therapy	[Not Applicable]	[Not Available]	[Not Available]	[Not Available]	Complete Remission/Response	[Not Available]	[Not Available]	Cervical Squamous Cell Carcinoma	[Not Available]	[Not Available]
195	20280122-A66A-4C83-8F25-0B9D97558DC2	TCGA-JX-A3Q0	2014-04-17	NO	YES	-23313	FEMALE	Post (prior bilateral ovariectomy OR >12 mo since LMP with no prior hysterectomy)	166	57	Never Used	BLACK OR AFRICAN AMERICAN	2	NOT HISPANIC OR LATINO	0	No	0	TUMOR FREE	0	2	Alive	5957	[Not Applicable]	[Not Available]	[Not Available]	0	[Not Available]	NO	[Not Available]	YES	24	4	1997	20	[Not Evaluated]	[Not Available]	1	[Not Available]	Post-Adjuvant Therapy	[Not Applicable]	[Not Available]	[Not Available]	[Not Available]	Complete Remission/Response	[Not Available]	[Not Available]	Cervical Squamous Cell Carcinoma	[Not Available]	[Not Available]
196	34629EB8-0C5E-4910-8E13-BF7D6A1E337F	TCGA-JX-A3Q8	2014-04-17	NO	YES	-14839	FEMALE	Pre (<6 months since LMP AND no prior bilateral ovariectomy AND not on estrogen replacement)	158	68	Former User	ASIAN	1	NOT HISPANIC OR LATINO	1	No	0	TUMOR FREE	0	3	Alive	922	[Not Applicable]	[Not Available]	[Not Available]	1	[Not Available]	NO	[Not Available]	NO	[Not Available]	1	[Not Available]	[Not Available]	[Not Available]	[Not Available]	0	[Not Available]	Other	Post operative visit	[Not Available]	[Not Available]	[Not Available]	Complete Remission/Response	[Not Available]	[Not Available]	Endocervical Type of Adenocarcinoma	[Not Available]	[Not Available]
197	ACF5CBF3-09CA-4F4D-A44E-1792613190FC	TCGA-JX-A5QV	2014-06-11	NO	YES	-13667	FEMALE	Pre (<6 months since LMP AND no prior bilateral ovariectomy AND not on estrogen replacement)	165	61	Never Used	WHITE	4	NOT HISPANIC OR LATINO	0	No	0	TUMOR FREE	0	5	Alive	243	[Not Applicable]	[Not Available]	[Not Available]	1	[Not Available]	NO	[Not Available]	YES	[Not Available]	1	[Not Available]	[Not Available]	[Unknown]	[Not Available]	0	[Not Available]	Preoperative	[Not Applicable]	[Not Available]	[Not Available]	[Not Available]	Complete Remission/Response	[Not Available]	[Not Available]	Cervical Squamous Cell Carcinoma	[Not Available]	[Not Available]
198	E15D92A1-6925-4B58-A494-D6F665F67B83	TCGA-LP-A4AU	2013-03-12	YES	NO	-13074	FEMALE	Pre (<6 months since LMP AND no prior bilateral ovariectomy AND not on estrogen replacement)	153	49	[Unknown]	ASIAN	1	NOT HISPANIC OR LATINO	[Not Available]	No	[Not Available]	TUMOR FREE	[Not Available]	1	Alive	3	[Not Applicable]	[Not Available]	[Not Available]	[Not Available]	[Not Available]	NO	[Not Available]	YES	[Not Available]	1	[Not Available]	[Not Available]	[Not Available]	[Not Available]	[Not Available]	[Not Available]	[Not Available]	[Not Applicable]	[Not Available]	[Not Available]	[Not Available]	[Not Available]	[Not Available]	[Not Available]	Cervical Squamous Cell Carcinoma	[Not Available]	[Not Available]
199	F241D6B1-2C32-4478-8F8D-8C746464F7D1	TCGA-LP-A4AV	2013-03-12	YES	NO	[Not Available]	FEMALE	[Not Evaluated]	153	42	[Unknown]	ASIAN	4	NOT HISPANIC OR LATINO	[Not Available]	No	[Not Available]	TUMOR FREE	[Not Available]	4	Alive	0	[Not Applicable]	[Not Available]	[Not Available]	[Not Available]	[Not Available]	NO	[Not Available]	NO	[Not Available]	1	[Not Available]	[Not Available]	[Not Available]	[Not Available]	[Not Available]	[Not Available]	[Not Available]	[Not Applicable]	[Not Available]	[Not Available]	[Not Available]	[Not Available]	[Not Available]	[Not Available]	Cervical Squamous Cell Carcinoma	[Not Available]	[Not Available]
200	74E47DED-2C00-4455-AAA6-CD662DFBF05E	TCGA-LP-A4AW	2013-03-12	YES	NO	-19079	FEMALE	Peri (6-12 months since last menstrual period)	158	52	[Unknown]	ASIAN	2	NOT HISPANIC OR LATINO	[Not Available]	No	[Not Available]	TUMOR FREE	[Not Available]	2	Alive	27	[Not Applicable]	[Not Available]	[Not Available]	[Not Available]	[Not Available]	NO	[Not Available]	NO	[Not Available]	1	[Not Available]	[Not Available]	[Not Available]	[Not Available]	[Not Available]	[Not Available]	[Not Available]	[Not Applicable]	[Not Available]	[Not Available]	[Not Available]	[Not Available]	[Not Available]	[Not Available]	Cervical Squamous Cell Carcinoma	[Not Available]	[Not Available]
201	3223FEC6-1D35-419A-8EE9-7C5885B8BE1E	TCGA-LP-A4AX	2013-03-12	YES	NO	-16544	FEMALE	Peri (6-12 months since last menstrual period)	[Not Available]	[Not Available]	[Unknown]	ASIAN	2	NOT HISPANIC OR LATINO	[Not Available]	No	[Not Available]	TUMOR FREE	[Not Available]	2	Alive	2	[Not Applicable]	[Not Available]	[Not Available]	[Not Available]	[Not Available]	NO	[Not Available]	NO	[Not Available]	1	[Not Available]	[Not Available]	[Not Available]	[Not Available]	[Not Available]	[Not Available]	[Not Available]	[Not Applicable]	[Not Available]	[Not Available]	[Not Available]	[Not Available]	[Not Available]	[Not Available]	Cervical Squamous Cell Carcinoma	[Not Available]	[Not Available]
202	1EF20703-3684-4B43-A31F-892073208377	TCGA-LP-A5U2	2014-07-03	YES	NO	-11049	FEMALE	Pre (<6 months since LMP AND no prior bilateral ovariectomy AND not on estrogen replacement)	160	51	Never Used	ASIAN	[Not Available]	NOT HISPANIC OR LATINO	1	No	[Not Available]	TUMOR FREE	[Not Available]	1	Alive	9	[Not Applicable]	[Not Available]	[Not Available]	[Not Available]	[Not Available]	YES	[Not Available]	NO	[Not Available]	1	[Not Available]	[Not Available]	[Unknown]	[Not Available]	1	[Not Available]	Preoperative	[Not Applicable]	[Not Available]	[Not Available]	[Not Available]	Complete Remission/Response	[Not Available]	[Not Available]	Endocervical Adenocarcinoma of the Usual Type	[Not Available]	[Not Available]
203	1399D31D-9D5E-441A-B400-8B8A92A6FF8B	TCGA-LP-A5U3	2014-01-03	YES	NO	-14698	FEMALE	Pre (<6 months since LMP AND no prior bilateral ovariectomy AND not on estrogen replacement)	160	50	Never Used	ASIAN	3	NOT HISPANIC OR LATINO	[Not Available]	No	[Not Available]	TUMOR FREE	[Not Available]	3	Alive	25	[Not Applicable]	[Not Available]	[Not Available]	[Not Available]	[Not Available]	NO	[Not Available]	[Unknown]	[Not Available]	1	[Not Available]	[Not Available]	[Unknown]	[Not Available]	1	[Not Available]	Preoperative	[Not Applicable]	[Not Available]	[Not Available]	[Not Available]	Complete Remission/Response	[Not Available]	[Not Available]	Cervical Squamous Cell Carcinoma	[Not Available]	[Not Available]
204	7067B7DA-FB1B-4827-8FE6-9433ED672D3B	TCGA-LP-A7HU	2014-01-03	YES	NO	-19595	FEMALE	Post (prior bilateral ovariectomy OR >12 mo since LMP with no prior hysterectomy)	155	58	Never Used	ASIAN	2	NOT HISPANIC OR LATINO	[Not Available]	No	[Not Available]	TUMOR FREE	[Not Available]	3	Alive	6	[Not Applicable]	[Not Available]	[Not Available]	[Not Available]	[Not Available]	NO	[Not Available]	[Unknown]	[Not Available]	1	[Not Available]	[Not Available]	[Unknown]	[Not Available]	1	[Not Available]	Preoperative	[Not Applicable]	[Not Available]	[Not Available]	[Not Available]	[Not Available]	[Not Available]	[Not Available]	Endocervical Type of Adenocarcinoma	[Not Available]	[Not Available]
205	FC2BCE29-4685-49F5-B901-2117BF673BB8	TCGA-MA-AA3W	2014-07-15	YES	NO	-20066	FEMALE	Post (prior bilateral ovariectomy OR >12 mo since LMP with no prior hysterectomy)	155	84	[Unknown]	WHITE	4	HISPANIC OR LATINO	[Not Available]	No	1	TUMOR FREE	[Not Available]	6	Alive	503	[Not Applicable]	[Not Available]	[Not Available]	1	[Not Available]	NO	[Not Available]	YES	18	2	[Not Available]	5.7	[Not Available]	[Not Available]	1	[Not Available]	Preoperative	[Not Applicable]	[Not Available]	[Not Available]	[Not Available]	Complete Remission/Response	[Not Available]	[Not Available]	Cervical Squamous Cell Carcinoma	[Not Available]	[Not Available]
206	ADB7C5C8-4AFD-40DC-89F1-571FBD88E4F9	TCGA-MA-AA3X	2014-07-15	YES	NO	-18412	FEMALE	Post (prior bilateral ovariectomy OR >12 mo since LMP with no prior hysterectomy)	170	73	[Unknown]	BLACK OR AFRICAN AMERICAN	2	NOT HISPANIC OR LATINO	[Not Available]	No	[Not Available]	TUMOR FREE	[Not Available]	3	Alive	617	[Not Applicable]	[Not Available]	[Not Available]	1	[Not Available]	NO	[Not Available]	YES	12	2	[Not Available]	9.5	[Not Available]	[Not Available]	1	[Not Available]	Pre-Adjuvant Therapy	[Not Applicable]	[Not Available]	[Not Available]	[Not Available]	Complete Remission/Response	[Not Available]	[Not Available]	Cervical Squamous Cell Carcinoma	[Not Available]	[Not Available]
207	2F261704-D600-4226-90D5-D51BA416B55C	TCGA-MA-AA3Y	2014-07-16	YES	NO	-17795	FEMALE	Pre (<6 months since LMP AND no prior bilateral ovariectomy AND not on estrogen replacement)	156	65	Never Used	WHITE	[Not Available]	HISPANIC OR LATINO	[Not Available]	No	[Not Available]	TUMOR FREE	[Not Available]	1	Alive	542	[Not Applicable]	[Not Available]	[Not Available]	1	[Not Available]	NO	[Not Available]	NO	[Not Available]	1	[Not Available]	[Not Available]	[Not Available]	[Not Available]	1	[Not Available]	Preoperative	[Not Applicable]	[Not Available]	[Not Available]	[Not Available]	Complete Remission/Response	[Not Available]	[Not Available]	Cervical Squamous Cell Carcinoma	[Not Available]	[Not Available]
208	BC2003B9-D489-4559-8672-D9FD2D82F2E8	TCGA-MA-AA3Z	2014-07-16	YES	NO	-15762	FEMALE	Pre (<6 months since LMP AND no prior bilateral ovariectomy AND not on estrogen replacement)	160	84	Former User	WHITE	5	HISPANIC OR LATINO	[Not Available]	No	[Not Available]	TUMOR FREE	[Not Available]	5	Alive	469	[Not Applicable]	[Not Available]	[Not Available]	[Not Available]	[Not Available]	NO	[Not Available]	YES	[Not Available]	1	[Not Available]	[Not Available]	[Not Available]	[Not Available]	1	[Not Available]	Pre-Adjuvant Therapy	[Not Applicable]	[Not Available]	[Not Available]	[Not Available]	Complete Remission/Response	[Not Available]	[Not Available]	Cervical Squamous Cell Carcinoma	[Not Available]	[Not Available]
209	81658CE6-D4A9-4EE0-AE8F-CF2FA8485701	TCGA-MA-AA41	2014-07-16	YES	NO	-12398	FEMALE	Pre (<6 months since LMP AND no prior bilateral ovariectomy AND not on estrogen replacement)	159	47	Former User	WHITE	3	HISPANIC OR LATINO	[Not Available]	No	[Not Available]	WITH TUMOR	[Not Available]	3	Alive	279	[Not Applicable]	[Not Available]	[Not Available]	[Not Available]	[Not Available]	NO	[Not Available]	YES	14	2	[Not Available]	5	[Not Available]	[Not Available]	1	[Not Available]	Pre-Adjuvant Therapy	[Not Applicable]	[Not Available]	[Not Available]	[Not Available]	Progressive Disease	[Not Available]	[Not Available]	Cervical Squamous Cell Carcinoma	[Not Available]	[Not Available]
210	DA5FCB99-16B4-4F9E-8602-D6A6192875EF	TCGA-MA-AA42	2014-07-22	YES	NO	-27460	FEMALE	Post (prior bilateral ovariectomy OR >12 mo since LMP with no prior hysterectomy)	140	63	[Unknown]	WHITE	6	HISPANIC OR LATINO	[Not Available]	No	[Not Available]	TUMOR FREE	[Not Available]	8	Alive	168	[Not Applicable]	[Not Available]	[Not Available]	2	[Not Available]	NO	[Not Available]	YES	[Not Available]	1	[Not Available]	[Not Available]	[Not Available]	[Not Available]	1	[Not Available]	Pre-Adjuvant Therapy	[Not Applicable]	[Not Available]	[Not Available]	[Not Available]	Complete Remission/Response	[Not Available]	[Not Available]	Cervical Squamous Cell Carcinoma	[Not Available]	[Not Available]
211	ED74703A-6838-4F4E-9524-D6FB7B208687	TCGA-MA-AA43	2014-07-22	YES	NO	-17658	FEMALE	Peri (6-12 months since last menstrual period)	152	72	Never Used	WHITE	6	HISPANIC OR LATINO	[Not Available]	No	[Not Available]	TUMOR FREE	[Not Available]	6	Alive	227	[Not Applicable]	[Not Available]	[Not Available]	[Not Available]	[Not Available]	NO	[Not Available]	YES	16	4	2013	11.6	[Not Available]	[Not Available]	1	[Not Available]	Pre-Adjuvant Therapy	[Not Applicable]	[Not Available]	[Not Available]	[Not Available]	Complete Remission/Response	[Not Available]	[Not Available]	Cervical Squamous Cell Carcinoma	[Not Available]	[Not Available]
212	77DA506B-E726-409F-B3EB-D41242862982	TCGA-MU-A51Y	2012-09-14	YES	NO	-10199	FEMALE	Pre (<6 months since LMP AND no prior bilateral ovariectomy AND not on estrogen replacement)	[Not Available]	31	[Not Available]	WHITE	1	[Unknown]	3	No	[Not Available]	TUMOR FREE	[Not Available]	[Not Available]	Alive	422	[Not Applicable]	[Not Available]	[Not Available]	[Not Available]	[Not Available]	[Not Available]	[Not Available]	NO	[Not Available]	1	[Not Available]	[Not Available]	[Not Available]	[Not Available]	[Not Available]	[Not Available]	[Not Available]	[Not Applicable]	[Not Available]	[Not Available]	[Not Available]	Complete Remission/Response	[Not Available]	[Not Available]	Cervical Squamous Cell Carcinoma	[Not Available]	[Not Available]
213	5E972E96-7271-439A-905C-6E308C1EF29E	TCGA-MU-A5YI	2013-05-23	YES	NO	-21927	FEMALE	Post (prior bilateral ovariectomy OR >12 mo since LMP with no prior hysterectomy)	175	101	[Not Available]	BLACK OR AFRICAN AMERICAN	[Not Available]	NOT HISPANIC OR LATINO	[Not Available]	No	[Not Available]	TUMOR FREE	[Not Available]	[Not Available]	Alive	1	[Not Applicable]	[Not Available]	[Not Available]	[Not Available]	[Not Available]	[Not Available]	[Not Available]	NO	37	3	1991	10	[Not Available]	[Not Available]	[Not Available]	[Not Available]	[Not Available]	[Not Applicable]	[Not Available]	[Not Available]	[Not Available]	[Not Available]	[Not Available]	[Not Available]	Cervical Squamous Cell Carcinoma	[Not Available]	[Not Available]
214	1D730565-FFA9-4CC7-A713-C4B5B7BBB29F	TCGA-MU-A8JM	2013-10-09	YES	NO	-17156	FEMALE	[Unknown]	165	86	[Unknown]	WHITE	1	NOT HISPANIC OR LATINO	[Not Available]	No	[Not Available]	TUMOR FREE	[Not Available]	2	Alive	165	[Not Applicable]	[Not Available]	[Not Available]	1	[Not Available]	NO	[Not Available]	NO	16	4	2012	30	[Unknown]	[Not Available]	[Not Available]	[Not Available]	[Not Available]	[Not Applicable]	[Not Available]	[Not Available]	[Not Available]	Complete Remission/Response	[Not Available]	[Not Available]	Cervical Squamous Cell Carcinoma	[Not Available]	[Not Available]
215	CEF2EFB2-93CC-4BDF-A343-9965E7E0432C	TCGA-MY-A5BD	2013-05-20	NO	YES	-22901	FEMALE	Post (prior bilateral ovariectomy OR >12 mo since LMP with no prior hysterectomy)	157	91	[Not Available]	WHITE	[Not Available]	HISPANIC OR LATINO	[Not Available]	No	[Not Available]	TUMOR FREE	[Not Available]	[Not Available]	Alive	904	[Not Applicable]	[Not Available]	[Not Available]	[Not Available]	[Not Available]	[Not Available]	[Not Available]	NO	[Not Available]	1	[Not Available]	[Not Available]	[Not Available]	[Not Available]	[Not Available]	[Not Available]	[Not Available]	[Not Applicable]	[Not Available]	[Not Available]	[Not Available]	[Not Available]	[Not Available]	[Not Available]	Cervical Squamous Cell Carcinoma	[Not Available]	[Not Available]
216	F8AB17EC-C365-41A6-A4BC-36653E84BCE5	TCGA-MY-A5BE	2013-05-20	NO	YES	-15466	FEMALE	Post (prior bilateral ovariectomy OR >12 mo since LMP with no prior hysterectomy)	157	84	[Not Available]	BLACK OR AFRICAN AMERICAN	[Not Available]	NOT HISPANIC OR LATINO	[Not Available]	No	[Not Available]	TUMOR FREE	[Not Available]	[Not Available]	Alive	2	[Not Applicable]	[Not Available]	[Not Available]	[Not Available]	[Not Available]	[Not Available]	[Not Available]	NO	[Not Available]	1	[Not Available]	[Not Available]	[Not Available]	[Not Available]	[Not Available]	[Not Available]	[Not Available]	[Not Applicable]	[Not Available]	[Not Available]	[Not Available]	[Not Available]	[Not Available]	[Not Available]	Cervical Squamous Cell Carcinoma	[Not Available]	[Not Available]
217	4F4E8834-A716-42E6-BD51-60D80A619202	TCGA-MY-A5BF	2013-05-20	YES	NO	-25082	FEMALE	Post (prior bilateral ovariectomy OR >12 mo since LMP with no prior hysterectomy)	170	74	[Not Available]	WHITE	[Not Available]	NOT HISPANIC OR LATINO	[Not Available]	No	[Not Available]	TUMOR FREE	[Not Available]	[Not Available]	Alive	132	[Not Applicable]	[Not Available]	[Not Available]	[Not Available]	[Not Available]	[Not Available]	[Not Available]	NO	[Not Available]	1	[Not Available]	[Not Available]	[Not Available]	[Not Available]	[Not Available]	[Not Available]	[Not Available]	[Not Applicable]	[Not Available]	[Not Available]	[Not Available]	[Not Available]	[Not Available]	[Not Available]	Cervical Squamous Cell Carcinoma	[Not Available]	[Not Available]
218	C9F519B6-73F1-4737-83CB-F5EF208592CD	TCGA-MY-A913	2014-04-23	YES	NO	-10379	FEMALE	Pre (<6 months since LMP AND no prior bilateral ovariectomy AND not on estrogen replacement)	163	76	[Unknown]	BLACK OR AFRICAN AMERICAN	5	HISPANIC OR LATINO	1	No	[Not Available]	TUMOR FREE	[Not Available]	7	Alive	167	[Not Applicable]	[Not Available]	[Not Available]	1	[Not Available]	NO	[Not Available]	YES	[Not Available]	5	[Not Available]	[Not Available]	[Not Available]	[Not Available]	0	[Not Available]	Post-Adjuvant Therapy	[Not Applicable]	[Not Available]	[Not Available]	[Not Available]	Complete Remission/Response	[Not Available]	[Not Available]	Cervical Squamous Cell Carcinoma	[Not Available]	[Not Available]
219	55ADD854-E63F-4335-BEA9-23C3EB1E766A	TCGA-PN-A8MA	2014-03-25	YES	NO	-15918	FEMALE	Pre (<6 months since LMP AND no prior bilateral ovariectomy AND not on estrogen replacement)	167	71	Former User	BLACK OR AFRICAN AMERICAN	8	NOT HISPANIC OR LATINO	[Not Available]	No	[Not Available]	WITH TUMOR	[Not Available]	9	Alive	90	[Not Applicable]	[Not Available]	[Not Available]	1	[Not Available]	NO	[Not Available]	YES	[Not Available]	[Unknown]	[Not Available]	[Not Available]	[Unknown]	[Not Available]	1	[Not Available]	Other	during adjuvant therapy	[Not Available]	[Not Available]	[Not Available]	Stable Disease	[Not Available]	[Not Available]	Cervical Squamous Cell Carcinoma	[Not Available]	[Not Available]
220	F93CCD2D-3C77-4BD3-8CAC-5203BD57735F	TCGA-Q1-A5R1	2013-04-26	YES	NO	-11705	FEMALE	Pre (<6 months since LMP AND no prior bilateral ovariectomy AND not on estrogen replacement)	183	92	Current User	WHITE	1	NOT HISPANIC OR LATINO	[Not Available]	No	[Not Available]	TUMOR FREE	[Not Available]	2	Alive	113	[Not Applicable]	[Not Available]	[Not Available]	[Not Available]	[Not Available]	NO	[Not Available]	NO	[Not Available]	1	[Not Available]	[Not Available]	[Not Evaluated]	[Not Available]	0	[Not Available]	Other	Post-op	[Not Available]	[Not Available]	[Not Available]	Complete Remission/Response	[Not Available]	[Not Available]	Mucinous Adenocarcinoma of Endocervical Type	[Not Available]	[Not Available]
221	F3CBADB3-3B83-47CD-B8A0-B0E10343A295	TCGA-Q1-A5R2	2013-04-26	YES	NO	-23523	FEMALE	Post (prior bilateral ovariectomy OR >12 mo since LMP with no prior hysterectomy)	160	76	Former User	WHITE	2	NOT HISPANIC OR LATINO	[Not Available]	No	[Not Available]	WITH TUMOR	[Not Available]	2	Alive	105	[Not Applicable]	[Not Available]	[Not Available]	[Not Available]	[Not Available]	NO	[Not Available]	YES	[Not Available]	1	[Not Available]	[Not Available]	[Not Evaluated]	[Not Available]	0	[Not Available]	Post-Adjuvant Therapy	[Not Applicable]	[Not Available]	[Not Available]	[Not Available]	[Not Applicable]	[Not Available]	[Not Available]	Cervical Squamous Cell Carcinoma	[Not Available]	[Not Available]
222	73AA428A-4288-45F8-8A53-CEC173DCC61F	TCGA-Q1-A5R3	2013-04-26	YES	NO	-20574	FEMALE	Post (prior bilateral ovariectomy OR >12 mo since LMP with no prior hysterectomy)	162	50	Former User	WHITE	3	NOT HISPANIC OR LATINO	[Not Available]	No	[Not Available]	TUMOR FREE	[Not Available]	5	Alive	178	[Not Applicable]	[Not Available]	[Not Available]	[Not Available]	[Not Available]	NO	[Not Available]	YES	[Not Available]	1	[Not Available]	[Not Available]	[Not Evaluated]	[Not Available]	0	[Not Available]	Post-Adjuvant Therapy	[Not Applicable]	[Not Available]	[Not Available]	[Not Available]	Complete Remission/Response	[Not Available]	[Not Available]	Cervical Squamous Cell Carcinoma	[Not Available]	[Not Available]
223	46ADFBBE-3ADD-41CD-A388-B1EE0790BF62	TCGA-Q1-A6DT	2013-08-20	YES	NO	-20286	FEMALE	Post (prior bilateral ovariectomy OR >12 mo since LMP with no prior hysterectomy)	[Not Available]	[Not Available]	[Unknown]	WHITE	[Not Available]	NOT HISPANIC OR LATINO	[Not Available]	No	[Not Available]	WITH TUMOR	[Not Available]	[Not Available]	Alive	103	[Not Applicable]	[Not Available]	[Not Available]	[Not Available]	[Not Available]	NO	[Not Available]	NO	[Not Available]	1	[Not Available]	[Not Available]	[Not Available]	[Not Available]	[Not Available]	[Not Available]	[Not Available]	[Not Applicable]	[Not Available]	[Not Available]	[Not Available]	[Not Available]	[Not Available]	[Not Available]	Cervical Squamous Cell Carcinoma	[Not Available]	[Not Available]
224	C80F777E-D150-40F3-9FA9-02EF9A6D7692	TCGA-Q1-A6DV	2013-08-20	YES	NO	-13166	FEMALE	Pre (<6 months since LMP AND no prior bilateral ovariectomy AND not on estrogen replacement)	152	60	Current User	ASIAN	[Not Available]	NOT HISPANIC OR LATINO	[Not Available]	No	[Not Available]	[Unknown]	[Not Available]	0	Alive	113	[Not Applicable]	[Not Available]	[Not Available]	[Not Available]	[Not Available]	NO	[Not Available]	NO	[Not Available]	1	[Not Available]	[Not Available]	[Not Available]	[Not Available]	0	[Not Available]	Preoperative	[Not Applicable]	[Not Available]	[Not Available]	[Not Available]	[Unknown]	[Not Available]	[Not Available]	Mucinous Adenocarcinoma of Endocervical Type	[Not Available]	[Not Available]
225	5DBD5436-696E-40FA-881B-C2386573AC68	TCGA-Q1-A6DW	2013-08-20	YES	NO	-16200	FEMALE	Pre (<6 months since LMP AND no prior bilateral ovariectomy AND not on estrogen replacement)	160	62	[Unknown]	WHITE	1	NOT HISPANIC OR LATINO	[Not Available]	No	[Not Available]	[Unknown]	[Not Available]	1	Alive	175	[Not Applicable]	[Not Available]	[Not Available]	[Not Available]	[Not Available]	NO	[Not Available]	YES	35	4	2009	2.5	[Not Available]	[Not Available]	0	[Not Available]	Post-Adjuvant Therapy	[Not Applicable]	[Not Available]	[Not Available]	[Not Available]	[Unknown]	[Not Available]	[Not Available]	Cervical Squamous Cell Carcinoma	[Not Available]	[Not Available]
226	D0CBE668-5C95-4261-A1E8-CEF55093A0F7	TCGA-Q1-A73O	2013-10-31	YES	NO	-13601	FEMALE	Pre (<6 months since LMP AND no prior bilateral ovariectomy AND not on estrogen replacement)	152	76	[Unknown]	[Not Evaluated]	[Not Available]	HISPANIC OR LATINO	[Not Available]	No	[Not Available]	[Unknown]	[Not Available]	[Not Available]	Alive	146	[Not Applicable]	[Not Available]	[Not Available]	[Not Available]	[Not Available]	NO	[Not Available]	YES	[Not Available]	1	[Not Available]	[Not Available]	[Not Available]	[Not Available]	0	[Not Available]	Post-Adjuvant Therapy	[Not Applicable]	[Not Available]	[Not Available]	[Not Available]	[Unknown]	[Not Available]	[Not Available]	Cervical Squamous Cell Carcinoma	[Not Available]	[Not Available]
227	3A3A9B5E-12A1-41F5-A54C-D4C1E0ECCB9E	TCGA-Q1-A73P	2013-10-31	YES	NO	-16450	FEMALE	Pre (<6 months since LMP AND no prior bilateral ovariectomy AND not on estrogen replacement)	173	82	Former User	WHITE	5	NOT HISPANIC OR LATINO	[Not Available]	No	[Not Available]	[Unknown]	[Not Available]	6	Alive	146	[Not Applicable]	[Not Available]	[Not Available]	[Not Available]	[Not Available]	NO	[Not Available]	NO	[Not Available]	1	[Not Available]	[Not Available]	[Not Available]	[Not Available]	0	[Not Available]	Post-Adjuvant Therapy	[Not Applicable]	[Not Available]	[Not Available]	[Not Available]	[Unknown]	[Not Available]	[Not Available]	Endocervical Type of Adenocarcinoma	[Not Available]	[Not Available]
228	5C72BDA2-2EC0-455F-AB27-7247FD5FFFF9	TCGA-Q1-A73Q	2013-10-31	YES	NO	-16851	FEMALE	Pre (<6 months since LMP AND no prior bilateral ovariectomy AND not on estrogen replacement)	158	87	[Unknown]	WHITE	1	NOT HISPANIC OR LATINO	[Not Available]	No	1	[Unknown]	[Not Available]	2	Alive	179	[Not Applicable]	[Not Available]	[Not Available]	[Not Available]	[Not Available]	NO	[Not Available]	YES	13	2	[Not Available]	3.3	[Not Available]	[Not Available]	0	[Not Available]	Post-Adjuvant Therapy	[Not Applicable]	[Not Available]	[Not Available]	[Not Available]	[Unknown]	[Not Available]	[Not Available]	Cervical Squamous Cell Carcinoma	[Not Available]	[Not Available]
229	D9B0AC5A-811D-4305-BB1C-A965BD389CE4	TCGA-Q1-A73R	2013-10-31	YES	NO	-16701	FEMALE	Pre (<6 months since LMP AND no prior bilateral ovariectomy AND not on estrogen replacement)	155	95	[Unknown]	WHITE	[Not Available]	[Not Evaluated]	[Not Available]	No	[Not Available]	[Unknown]	[Not Available]	[Not Available]	Alive	190	[Not Applicable]	[Not Available]	[Not Available]	[Not Available]	[Not Available]	NO	[Not Available]	NO	[Not Available]	1	[Not Available]	[Not Available]	[Not Available]	[Not Available]	0	[Not Available]	Post-Adjuvant Therapy	[Not Applicable]	[Not Available]	[Not Available]	[Not Available]	[Unknown]	[Not Available]	[Not Available]	Endocervical Type of Adenocarcinoma	[Not Available]	[Not Available]
230	B0F63819-FC86-4981-9D92-0115C6DE3BCE	TCGA-Q1-A73S	2013-10-31	YES	NO	-12229	FEMALE	Pre (<6 months since LMP AND no prior bilateral ovariectomy AND not on estrogen replacement)	160	68	Former User	WHITE	2	NOT HISPANIC OR LATINO	[Not Available]	No	[Not Available]	[Unknown]	[Not Available]	4	Alive	316	[Not Applicable]	[Not Available]	[Not Available]	[Not Available]	[Not Available]	NO	[Not Available]	YES	19	4	2012	7.5	[Not Available]	[Not Available]	0	[Not Available]	Post-Adjuvant Therapy	[Not Applicable]	[Not Available]	[Not Available]	[Not Available]	[Unknown]	[Not Available]	[Not Available]	Adenosquamous	[Not Available]	[Not Available]
231	0E137272-A21C-4C5E-BFD1-A774B339A753	TCGA-R2-A69V	2013-07-15	YES	NO	-15479	FEMALE	Peri (6-12 months since last menstrual period)	157	116	[Unknown]	WHITE	1	NOT HISPANIC OR LATINO	[Not Available]	No	[Not Available]	TUMOR FREE	[Not Available]	[Not Available]	Alive	596	[Not Applicable]	[Not Available]	[Not Available]	[Not Available]	[Not Available]	NO	[Not Available]	YES	[Not Available]	1	[Not Available]	[Not Available]	[Not Available]	[Not Available]	[Not Available]	[Not Available]	[Not Available]	[Not Applicable]	[Not Available]	[Not Available]	[Not Available]	Complete Remission/Response	[Not Available]	[Not Available]	Cervical Squamous Cell Carcinoma	[Not Available]	[Not Available]
232	BDAD2F13-EDE2-4AAD-91A4-BF60F8888BF2	TCGA-RA-A741	2013-11-13	YES	NO	-12607	FEMALE	Pre (<6 months since LMP AND no prior bilateral ovariectomy AND not on estrogen replacement)	165	86	[Unknown]	WHITE	0	NOT HISPANIC OR LATINO	0	No	0	[Unknown]	0	0	Alive	118	[Not Applicable]	[Not Available]	[Not Available]	0	[Not Available]	NO	[Not Available]	YES	21	4	2013	10	[Not Available]	[Not Available]	0	[Not Available]	Preoperative	[Not Applicable]	[Not Available]	[Not Available]	[Not Available]	[Unknown]	[Not Available]	[Not Available]	Cervical Squamous Cell Carcinoma	[Not Available]	[Not Available]
233	0F18EF74-019B-478D-AECD-60CC715BFDB7	TCGA-UC-A7PD	2014-02-04	NO	YES	-7855	FEMALE	Pre (<6 months since LMP AND no prior bilateral ovariectomy AND not on estrogen replacement)	[Not Available]	[Not Available]	Former User	AMERICAN INDIAN OR ALASKA NATIVE	4	[Not Evaluated]	1	No	0	WITH TUMOR	0	5	Dead	[Not Available]	355	Cervical Cancer	[Not Available]	0	[Not Available]	YES	[Not Available]	YES	13	2	[Not Available]	1.75	[Not Available]	[Not Available]	1	[Not Available]	Preoperative	[Not Applicable]	[Not Available]	[Not Available]	[Not Available]	Complete Remission/Response	[Not Available]	[Not Available]	Cervical Squamous Cell Carcinoma	[Not Available]	[Not Available]
234	1451821E-DD49-41FA-A52E-32F8524FFE82	TCGA-UC-A7PF	2014-02-04	NO	YES	-16412	FEMALE	Pre (<6 months since LMP AND no prior bilateral ovariectomy AND not on estrogen replacement)	[Not Available]	210	[Unknown]	[Not Evaluated]	2	[Not Evaluated]	0	No	2	[Unknown]	0	4	Dead	[Not Available]	2859	[Unknown]	[Not Available]	0	[Not Available]	NO	[Not Available]	[Unknown]	[Not Available]	2	[Not Available]	[Not Available]	[Not Available]	[Not Available]	[Not Available]	[Not Available]	[Not Available]	[Not Applicable]	[Not Available]	[Not Available]	[Not Available]	[Not Available]	[Not Available]	[Not Available]	Cervical Squamous Cell Carcinoma	[Not Available]	[Not Available]
235	53D99A89-6EBD-4637-91DB-7CE43EBC6B8B	TCGA-UC-A7PG	2014-07-17	NO	YES	-16231	FEMALE	Pre (<6 months since LMP AND no prior bilateral ovariectomy AND not on estrogen replacement)	[Not Available]	82	[Unknown]	WHITE	3	[Not Evaluated]	2	No	0	WITH TUMOR	0	5	Dead	[Not Available]	370	Cervical Cancer	[Not Available]	0	[Not Available]	NO	[Not Available]	YES	18	2	[Not Available]	52	[Not Available]	[Not Available]	1	[Not Available]	Preoperative	[Not Applicable]	[Not Available]	[Not Available]	[Not Available]	Progressive Disease	[Not Available]	[Not Available]	Cervical Squamous Cell Carcinoma	[Not Available]	[Not Available]
236	C659F1C9-F3B4-4CFE-8627-2BB716C62B96	TCGA-UC-A7PI	2014-07-17	NO	YES	-16427	FEMALE	Pre (<6 months since LMP AND no prior bilateral ovariectomy AND not on estrogen replacement)	[Not Available]	64	Former User	WHITE	0	NOT HISPANIC OR LATINO	1	No	0	TUMOR FREE	0	1	Alive	1905	[Not Applicable]	[Not Available]	[Not Available]	0	[Not Available]	NO	[Not Available]	NO	[Not Available]	1	[Not Available]	[Not Available]	[Not Available]	[Not Available]	1	[Not Available]	Preoperative	[Not Applicable]	[Not Available]	[Not Available]	[Not Available]	Complete Remission/Response	[Not Available]	[Not Available]	Endometrioid Adenocarcinoma of Endocervix	[Not Available]	[Not Available]
237	2C736C5C-9D32-4522-ACFD-6620BC291ACE	TCGA-VS-A8EB	2014-04-22	NO	YES	-15215	FEMALE	Pre (<6 months since LMP AND no prior bilateral ovariectomy AND not on estrogen replacement)	153	64	Never Used	WHITE	3	[Not Evaluated]	[Not Available]	No	[Not Available]	WITH TUMOR	[Not Available]	4	Dead	[Not Available]	305	Cervical Cancer	[Not Available]	1	[Not Available]	NO	[Not Available]	YES	[Not Available]	2	[Not Available]	[Not Available]	[Not Evaluated]	[Not Available]	1	[Not Available]	Pre-Adjuvant Therapy	[Not Applicable]	[Not Available]	[Not Available]	[Not Available]	Progressive Disease	[Not Available]	[Not Available]	Cervical Squamous Cell Carcinoma	[Not Available]	[Not Available]
238	AFB5442E-0249-475B-8F82-CAE4E0268AD1	TCGA-VS-A8EC	2014-04-22	NO	YES	-20286	FEMALE	Peri (6-12 months since last menstrual period)	154	46	Former User	WHITE	3	[Not Evaluated]	[Not Available]	No	[Not Available]	TUMOR FREE	[Not Available]	4	Alive	1050	[Not Applicable]	[Not Available]	[Not Available]	1	[Not Available]	NO	[Not Available]	YES	[Not Available]	[Unknown]	[Not Available]	[Not Available]	[Unknown]	[Not Available]	1	[Not Available]	[Not Available]	[Not Applicable]	[Not Available]	[Not Available]	[Not Available]	Complete Remission/Response	[Not Available]	[Not Available]	Cervical Squamous Cell Carcinoma	[Not Available]	[Not Available]
239	B0B293C1-BD7E-4BA8-9F44-47398488EF2C	TCGA-VS-A8EG	2014-04-22	NO	YES	-13166	FEMALE	Peri (6-12 months since last menstrual period)	160	66	Current User	[Unknown]	4	[Not Evaluated]	[Not Available]	No	[Not Available]	TUMOR FREE	[Not Available]	5	Alive	883	[Not Applicable]	[Not Available]	[Not Available]	1	[Not Available]	NO	[Not Available]	YES	[Not Available]	1	[Not Available]	[Not Available]	[Unknown]	[Not Available]	0	[Not Available]	Pre-Adjuvant Therapy	[Not Applicable]	[Not Available]	[Not Available]	[Not Available]	Complete Remission/Response	[Not Available]	[Not Available]	Cervical Squamous Cell Carcinoma	[Not Available]	[Not Available]
240	05026179-B1DA-411E-A286-89727B1AE380	TCGA-VS-A8EH	2014-04-22	NO	YES	-20728	FEMALE	Peri (6-12 months since last menstrual period)	157	44	Never Used	[Unknown]	4	[Not Evaluated]	[Not Available]	No	[Not Available]	TUMOR FREE	[Not Available]	4	Alive	615	[Not Applicable]	[Not Available]	[Not Available]	[Not Available]	[Not Available]	NO	[Not Available]	YES	39	2	[Not Available]	3	[Unknown]	[Not Available]	2	[Not Available]	Pre-Adjuvant Therapy	[Not Applicable]	[Not Available]	[Not Available]	[Not Available]	Complete Remission/Response	[Not Available]	[Not Available]	Cervical Squamous Cell Carcinoma	[Not Available]	[Not Available]
241	7B228C3B-E604-41A1-9B76-8DD3D5A59FFE	TCGA-VS-A8EI	2014-04-22	NO	YES	-14129	FEMALE	Pre (<6 months since LMP AND no prior bilateral ovariectomy AND not on estrogen replacement)	158	58	Never Used	WHITE	4	[Not Evaluated]	[Not Available]	No	[Not Available]	TUMOR FREE	[Not Available]	4	Alive	428	[Not Applicable]	[Not Available]	[Not Available]	[Not Available]	[Not Available]	NO	[Not Available]	YES	[Not Available]	1	[Not Available]	[Not Available]	[Not Evaluated]	[Not Available]	1	[Not Available]	Pre-Adjuvant Therapy	[Not Applicable]	[Not Available]	[Not Available]	[Not Available]	Complete Remission/Response	[Not Available]	[Not Available]	Cervical Squamous Cell Carcinoma	[Not Available]	[Not Available]
242	2E08A89E-4035-4782-B54F-F98EEF5DB80D	TCGA-VS-A8EJ	2014-04-22	NO	YES	-22000	FEMALE	Post (prior bilateral ovariectomy OR >12 mo since LMP with no prior hysterectomy)	167	113	[Unknown]	WHITE	3	[Not Evaluated]	[Not Available]	No	[Not Available]	WITH TUMOR	[Not Available]	3	Dead	[Not Available]	607	Cervical Cancer	[Not Available]	[Not Available]	[Not Available]	NO	[Not Available]	YES	[Not Available]	1	[Not Available]	[Not Available]	[Unknown]	[Not Available]	0	[Not Available]	Pre-Adjuvant Therapy	[Not Applicable]	[Not Available]	[Not Available]	[Not Available]	Progressive Disease	[Not Available]	[Not Available]	Cervical Squamous Cell Carcinoma	[Not Available]	[Not Available]
243	D9C2CA21-F1A6-4CF4-BE28-6C2492DD38E5	TCGA-VS-A8EK	2014-04-22	NO	YES	-23817	FEMALE	[Not Evaluated]	153	50	[Unknown]	WHITE	5	[Not Evaluated]	[Not Available]	No	[Not Available]	WITH TUMOR	[Not Available]	6	Dead	[Not Available]	829	Cervical Cancer	[Not Available]	1	[Not Available]	NO	[Not Available]	YES	[Not Available]	[Unknown]	[Not Available]	[Not Available]	[Not Evaluated]	[Not Available]	0	[Not Available]	Pre-Adjuvant Therapy	[Not Applicable]	[Not Available]	[Not Available]	[Not Available]	Partial Remission/Response	[Not Available]	[Not Available]	Cervical Squamous Cell Carcinoma	[Not Available]	[Not Available]
244	E0A5D99B-B58B-4301-B2DC-A767D90059B1	TCGA-VS-A8EL	2014-04-22	NO	YES	-14162	FEMALE	Pre (<6 months since LMP AND no prior bilateral ovariectomy AND not on estrogen replacement)	166	78	Former User	BLACK OR AFRICAN AMERICAN	3	[Not Evaluated]	[Not Available]	No	[Not Available]	TUMOR FREE	[Not Available]	3	Alive	1628	[Not Applicable]	[Not Available]	[Not Available]	[Not Available]	[Not Available]	NO	[Not Available]	YES	[Not Available]	1	[Not Available]	[Not Available]	[Unknown]	[Not Available]	1	[Not Available]	Preoperative	[Not Applicable]	[Not Available]	[Not Available]	[Not Available]	Complete Remission/Response	[Not Available]	[Not Available]	Cervical Squamous Cell Carcinoma	[Not Available]	[Not Available]
245	6C3C8219-74AB-4E54-81F5-84D4D5884252	TCGA-VS-A8Q8	2014-03-31	NO	YES	-9571	FEMALE	Pre (<6 months since LMP AND no prior bilateral ovariectomy AND not on estrogen replacement)	166	92	Former User	WHITE	[Not Available]	[Not Evaluated]	[Not Available]	No	[Not Available]	WITH TUMOR	[Not Available]	0	Dead	[Not Available]	978	Cervical Cancer	[Not Available]	[Not Available]	[Not Available]	NO	[Not Available]	YES	[Not Available]	1	[Not Available]	[Not Available]	[Unknown]	[Not Available]	0	[Not Available]	Preoperative	[Not Applicable]	[Not Available]	[Not Available]	[Not Available]	Progressive Disease	[Not Available]	[Not Available]	Cervical Squamous Cell Carcinoma	[Not Available]	[Not Available]
246	5798D741-C198-4C14-BCC2-E3B17CAF1BE3	TCGA-VS-A8Q9	2014-03-30	NO	YES	-28881	FEMALE	Post (prior bilateral ovariectomy OR >12 mo since LMP with no prior hysterectomy)	150	49	[Unknown]	WHITE	8	[Not Evaluated]	[Not Available]	No	[Not Available]	TUMOR FREE	[Not Available]	12	Alive	1400	[Not Applicable]	[Not Available]	[Not Available]	4	[Not Available]	NO	[Not Available]	YES	[Not Available]	1	[Not Available]	[Not Available]	[Unknown]	[Not Available]	1	[Not Available]	Pre-Adjuvant Therapy	[Not Applicable]	[Not Available]	[Not Available]	[Not Available]	Complete Remission/Response	[Not Available]	[Not Available]	Cervical Squamous Cell Carcinoma	[Not Available]	[Not Available]
247	1A3D5555-7013-4F06-878A-98944F075B63	TCGA-VS-A8QA	2014-03-30	NO	YES	-16072	FEMALE	Peri (6-12 months since last menstrual period)	160	67	[Unknown]	[Unknown]	2	[Not Evaluated]	[Not Available]	No	[Not Available]	TUMOR FREE	[Not Available]	2	Alive	708	[Not Applicable]	[Not Available]	[Not Available]	[Not Available]	[Not Available]	NO	[Not Available]	YES	[Not Available]	1	[Not Available]	[Not Available]	[Unknown]	[Not Available]	0	[Not Available]	Preoperative	[Not Applicable]	[Not Available]	[Not Available]	[Not Available]	Complete Remission/Response	[Not Available]	[Not Available]	Cervical Squamous Cell Carcinoma	[Not Available]	[Not Available]
248	CB695FDD-381E-4C00-836E-0BA27E32176B	TCGA-VS-A8QC	2014-03-30	NO	YES	-18743	FEMALE	Peri (6-12 months since last menstrual period)	152	90	[Unknown]	WHITE	7	[Not Evaluated]	[Not Available]	No	[Not Available]	WITH TUMOR	[Not Available]	7	Dead	[Not Available]	350	Cervical Cancer	[Not Available]	[Not Available]	[Not Available]	NO	[Not Available]	YES	[Not Available]	2	[Not Available]	[Not Available]	[Not Evaluated]	[Not Available]	2	[Not Available]	Pre-Adjuvant Therapy	[Not Applicable]	[Not Available]	[Not Available]	[Not Available]	Progressive Disease	[Not Available]	[Not Available]	Cervical Squamous Cell Carcinoma	[Not Available]	[Not Available]
249	21254CB0-68F3-4ECC-8D9A-73FB0E994C5B	TCGA-VS-A8QF	2014-03-30	NO	YES	-15374	FEMALE	Pre (<6 months since LMP AND no prior bilateral ovariectomy AND not on estrogen replacement)	159	68	[Unknown]	WHITE	5	[Not Evaluated]	[Not Available]	No	[Not Available]	TUMOR FREE	[Not Available]	5	Alive	1507	[Not Applicable]	[Not Available]	[Not Available]	[Not Available]	[Not Available]	NO	[Not Available]	YES	12	4	2010	[Not Available]	[Not Evaluated]	[Not Available]	0	[Not Available]	Pre-Adjuvant Therapy	[Not Applicable]	[Not Available]	[Not Available]	[Not Available]	Complete Remission/Response	[Not Available]	[Not Available]	Cervical Squamous Cell Carcinoma	[Not Available]	[Not Available]
250	C4F61715-EE58-4799-A5F4-0F5E27C4093D	TCGA-VS-A8QH	2014-03-30	NO	YES	-27909	FEMALE	Post (prior bilateral ovariectomy OR >12 mo since LMP with no prior hysterectomy)	159	73	[Unknown]	WHITE	3	[Not Evaluated]	[Not Available]	No	[Not Available]	WITH TUMOR	[Not Available]	4	Dead	[Not Available]	1210	Cervical Cancer	[Not Available]	1	[Not Available]	NO	[Not Available]	YES	[Not Available]	1	[Not Available]	[Not Available]	[Not Evaluated]	[Not Available]	0	[Not Available]	Pre-Adjuvant Therapy	[Not Applicable]	[Not Available]	[Not Available]	[Not Available]	Partial Remission/Response	[Not Available]	[Not Available]	Mucinous Adenocarcinoma of Endocervical Type	[Not Available]	[Not Available]
251	27D2B645-F1BF-4486-B0B5-273681B58625	TCGA-VS-A8QM	2014-04-01	NO	YES	-17168	FEMALE	[Not Available]	163	53	[Unknown]	[Unknown]	3	[Not Evaluated]	[Not Available]	No	[Not Available]	WITH TUMOR	[Not Available]	4	Dead	[Not Available]	951	Cervical Cancer	[Not Available]	1	[Not Available]	NO	[Not Available]	YES	15	2	[Not Available]	16	[Not Evaluated]	[Not Available]	0	[Not Available]	Pre-Adjuvant Therapy	[Not Applicable]	[Not Available]	[Not Available]	[Not Available]	Progressive Disease	[Not Available]	[Not Available]	Cervical Squamous Cell Carcinoma	[Not Available]	[Not Available]
252	2F6A0E87-1E6C-41F3-93E0-3E505FA654B0	TCGA-VS-A94W	2014-10-17	NO	YES	-14399	FEMALE	Pre (<6 months since LMP AND no prior bilateral ovariectomy AND not on estrogen replacement)	156	79	Never Used	WHITE	2	[Not Evaluated]	[Not Available]	No	[Not Available]	TUMOR FREE	[Not Available]	2	Alive	879	[Not Applicable]	[Not Available]	[Not Available]	[Not Available]	[Not Available]	NO	[Not Available]	YES	[Not Available]	1	[Not Available]	[Not Available]	[Unknown]	[Not Available]	0	[Not Available]	Preoperative	[Not Applicable]	[Not Available]	[Not Available]	[Not Available]	Complete Remission/Response	[Not Available]	[Not Available]	Cervical Squamous Cell Carcinoma	[Not Available]	[Not Available]
253	240EF385-DECC-48F7-A798-A81B4AB0410E	TCGA-VS-A94X	2014-05-21	NO	YES	-14955	FEMALE	[Not Evaluated]	158	42	[Not Available]	BLACK OR AFRICAN AMERICAN	3	[Not Evaluated]	[Not Available]	No	[Not Available]	WITH TUMOR	[Not Available]	3	Dead	[Not Available]	506	Cervical Cancer	[Not Available]	[Not Available]	[Not Available]	NO	[Not Available]	YES	[Not Available]	1	[Not Available]	[Not Available]	[Unknown]	[Not Available]	0	[Not Available]	Pre-Adjuvant Therapy	[Not Applicable]	[Not Available]	[Not Available]	[Not Available]	Partial Remission/Response	[Not Available]	[Not Available]	Cervical Squamous Cell Carcinoma	[Not Available]	[Not Available]
254	0E7F79CD-D188-42EA-BF96-4BA9E9B8606B	TCGA-VS-A94Y	2014-05-27	NO	YES	-17465	FEMALE	Pre (<6 months since LMP AND no prior bilateral ovariectomy AND not on estrogen replacement)	154	44	Current User	WHITE	1	[Not Evaluated]	[Not Available]	No	[Not Available]	WITH TUMOR	[Not Available]	1	Dead	[Not Available]	144	Cervical Cancer	[Not Available]	[Not Available]	[Not Available]	NO	[Not Available]	YES	44	2	[Not Available]	1	[Unknown]	[Not Available]	1	[Not Available]	Pre-Adjuvant Therapy	[Not Applicable]	[Not Available]	[Not Available]	[Not Available]	Progressive Disease	[Not Available]	[Not Available]	Cervical Squamous Cell Carcinoma	[Not Available]	[Not Available]
255	69BABA9F-19C2-4947-95DC-0DD3412929BA	TCGA-VS-A94Z	2014-05-21	NO	YES	-14046	FEMALE	Pre (<6 months since LMP AND no prior bilateral ovariectomy AND not on estrogen replacement)	162	96	Never Used	WHITE	3	[Not Evaluated]	[Not Available]	No	[Not Available]	TUMOR FREE	[Not Available]	4	Alive	707	[Not Applicable]	[Not Available]	[Not Available]	1	[Not Available]	NO	[Not Available]	YES	27	4	2010	2	[Unknown]	[Not Available]	1	[Not Available]	Pre-Adjuvant Therapy	[Not Applicable]	[Not Available]	[Not Available]	[Not Available]	Complete Remission/Response	[Not Available]	[Not Available]	Cervical Squamous Cell Carcinoma	[Not Available]	[Not Available]
256	3D190F07-2F79-4EE6-9F63-0B563DC05C74	TCGA-VS-A950	2014-10-01	NO	YES	-15365	FEMALE	Pre (<6 months since LMP AND no prior bilateral ovariectomy AND not on estrogen replacement)	165	57	Never Used	[Unknown]	3	[Not Evaluated]	[Not Available]	No	[Not Available]	WITH TUMOR	[Not Available]	3	Alive	967	[Not Applicable]	[Not Available]	[Not Available]	[Not Available]	[Not Available]	NO	[Not Available]	YES	[Not Available]	1	[Not Available]	[Not Available]	[Unknown]	[Not Available]	0	[Not Available]	Pre-Adjuvant Therapy	[Not Applicable]	[Not Available]	[Not Available]	[Not Available]	Partial Remission/Response	[Not Available]	[Not Available]	Cervical Squamous Cell Carcinoma	[Not Available]	[Not Available]
257	9FA42FE6-CCD0-4850-B08B-97B20ECEB8DF	TCGA-VS-A952	2014-05-21	NO	YES	-24345	FEMALE	Post (prior bilateral ovariectomy OR >12 mo since LMP with no prior hysterectomy)	155	65	Never Used	WHITE	3	[Not Evaluated]	[Not Available]	No	[Not Available]	TUMOR FREE	[Not Available]	3	Alive	1365	[Not Applicable]	[Not Available]	[Not Available]	[Not Available]	[Not Available]	NO	[Not Available]	NO	[Not Available]	1	[Not Available]	[Not Available]	[Not Evaluated]	[Not Available]	0	[Not Available]	Preoperative	[Not Applicable]	[Not Available]	[Not Available]	[Not Available]	Complete Remission/Response	[Not Available]	[Not Available]	Mucinous Adenocarcinoma of Endocervical Type	[Not Available]	[Not Available]
258	DA901E97-3A1D-4952-8254-9C4E60D2812C	TCGA-VS-A953	2014-10-17	NO	YES	-23277	FEMALE	Post (prior bilateral ovariectomy OR >12 mo since LMP with no prior hysterectomy)	155	47	Never Used	[Unknown]	11	[Not Evaluated]	[Not Available]	No	[Not Available]	WITH TUMOR	[Not Available]	11	Dead	[Not Available]	477	Cervical Cancer	[Not Available]	[Not Available]	[Not Available]	NO	[Not Available]	YES	[Not Available]	1	[Not Available]	[Not Available]	[Unknown]	[Not Available]	0	[Not Available]	Pre-Adjuvant Therapy	[Not Applicable]	[Not Available]	[Not Available]	[Not Available]	Partial Remission/Response	[Not Available]	[Not Available]	Cervical Squamous Cell Carcinoma	[Not Available]	[Not Available]
259	9BA72A77-AEF0-4788-8072-60C28902E55D	TCGA-VS-A954	2014-05-21	NO	YES	-24498	FEMALE	Post (prior bilateral ovariectomy OR >12 mo since LMP with no prior hysterectomy)	160	58	Never Used	[Unknown]	10	[Not Evaluated]	[Not Available]	No	[Not Available]	TUMOR FREE	[Not Available]	10	Alive	1295	[Not Applicable]	[Not Available]	[Not Available]	[Not Available]	[Not Available]	NO	[Not Available]	YES	[Not Available]	1	[Not Available]	[Not Available]	[Not Evaluated]	[Not Available]	1	[Not Available]	Pre-Adjuvant Therapy	[Not Applicable]	[Not Available]	[Not Available]	[Not Available]	Complete Remission/Response	[Not Available]	[Not Available]	Cervical Squamous Cell Carcinoma	[Not Available]	[Not Available]
260	CB31B3CE-8595-4D75-9436-BB59E95C3A19	TCGA-VS-A957	2014-05-27	NO	YES	-23585	FEMALE	Post (prior bilateral ovariectomy OR >12 mo since LMP with no prior hysterectomy)	156	91	Never Used	WHITE	4	[Not Evaluated]	[Not Available]	No	[Not Available]	TUMOR FREE	[Not Available]	4	Alive	1280	[Not Applicable]	[Not Available]	[Not Available]	[Not Available]	[Not Available]	NO	[Not Available]	YES	[Not Available]	1	[Not Available]	[Not Available]	[Not Evaluated]	[Not Available]	0	[Not Available]	Pre-Adjuvant Therapy	[Not Applicable]	[Not Available]	[Not Available]	[Not Available]	Complete Remission/Response	[Not Available]	[Not Available]	Cervical Squamous Cell Carcinoma	[Not Available]	[Not Available]
261	97CF3268-9756-4659-9E98-F200F96A91F4	TCGA-VS-A958	2014-05-21	NO	YES	-16905	FEMALE	Pre (<6 months since LMP AND no prior bilateral ovariectomy AND not on estrogen replacement)	151	61	Never Used	WHITE	4	[Not Evaluated]	[Not Available]	No	[Not Available]	TUMOR FREE	[Not Available]	4	Alive	1333	[Not Applicable]	[Not Available]	[Not Available]	[Not Available]	[Not Available]	NO	[Not Available]	YES	[Not Available]	1	[Not Available]	[Not Available]	[Unknown]	[Not Available]	1	[Not Available]	Pre-Adjuvant Therapy	[Not Applicable]	[Not Available]	[Not Available]	[Not Available]	Complete Remission/Response	[Not Available]	[Not Available]	Cervical Squamous Cell Carcinoma	[Not Available]	[Not Available]
262	F2BEA37E-0D19-49E1-91A0-A4DE4DFA2D35	TCGA-VS-A959	2014-05-27	NO	YES	-27897	FEMALE	Post (prior bilateral ovariectomy OR >12 mo since LMP with no prior hysterectomy)	145	47	Never Used	[Unknown]	11	[Not Evaluated]	[Not Available]	No	[Not Available]	TUMOR FREE	[Not Available]	11	Alive	1197	[Not Applicable]	[Not Available]	[Not Available]	[Not Available]	[Not Available]	NO	[Not Available]	YES	[Not Available]	1	[Not Available]	[Not Available]	[Not Evaluated]	[Not Available]	[Not Available]	[Not Available]	[Not Available]	[Not Applicable]	[Not Available]	[Not Available]	[Not Available]	Complete Remission/Response	[Not Available]	[Not Available]	Cervical Squamous Cell Carcinoma	[Not Available]	[Not Available]
263	939ABCA1-8BD0-4271-9A9B-666764EEB3B6	TCGA-VS-A9U5	2014-08-11	NO	YES	-21149	FEMALE	Peri (6-12 months since last menstrual period)	162	74	Never Used	WHITE	3	[Not Evaluated]	[Not Available]	No	[Not Available]	TUMOR FREE	[Not Available]	3	Alive	1185	[Not Applicable]	[Not Available]	[Not Available]	[Not Available]	[Not Available]	NO	[Not Available]	YES	[Not Available]	1	[Not Available]	[Not Available]	[Not Evaluated]	[Not Available]	0	[Not Available]	Pre-Adjuvant Therapy	[Not Applicable]	[Not Available]	[Not Available]	[Not Available]	Complete Remission/Response	[Not Available]	[Not Available]	Cervical Squamous Cell Carcinoma	[Not Available]	[Not Available]
264	98784BBE-E286-48DF-838D-1A88040658BF	TCGA-VS-A9U6	2014-08-11	NO	YES	-19109	FEMALE	Pre (<6 months since LMP AND no prior bilateral ovariectomy AND not on estrogen replacement)	156	66	Never Used	WHITE	1	[Not Evaluated]	[Not Available]	No	[Not Available]	WITH TUMOR	[Not Available]	2	Alive	1213	[Not Applicable]	[Not Available]	[Not Available]	1	[Not Available]	NO	[Not Available]	YES	[Not Available]	1	[Not Available]	[Not Available]	[Not Evaluated]	[Not Available]	1	[Not Available]	Preoperative	[Not Applicable]	[Not Available]	[Not Available]	[Not Available]	Stable Disease	[Not Available]	[Not Available]	Cervical Squamous Cell Carcinoma	[Not Available]	[Not Available]
265	6D01421E-D533-4967-8422-97FBC0FB0895	TCGA-VS-A9U7	2014-08-11	NO	YES	-11210	FEMALE	Pre (<6 months since LMP AND no prior bilateral ovariectomy AND not on estrogen replacement)	157	82	Current User	WHITE	1	[Not Evaluated]	[Not Available]	No	[Not Available]	TUMOR FREE	[Not Available]	3	Alive	1108	[Not Applicable]	[Not Available]	[Not Available]	2	[Not Available]	NO	[Not Available]	YES	[Not Available]	1	[Not Available]	[Not Available]	[Not Evaluated]	[Not Available]	0	[Not Available]	Preoperative	[Not Applicable]	[Not Available]	[Not Available]	[Not Available]	Complete Remission/Response	[Not Available]	[Not Available]	Cervical Squamous Cell Carcinoma	[Not Available]	[Not Available]
266	60117B70-36C0-41BB-A9FC-85DB8FA10102	TCGA-VS-A9UA	2014-08-11	NO	YES	-22221	FEMALE	Post (prior bilateral ovariectomy OR >12 mo since LMP with no prior hysterectomy)	134	88	Never Used	WHITE	2	[Not Evaluated]	[Not Available]	No	[Not Available]	TUMOR FREE	[Not Available]	2	Alive	526	[Not Applicable]	[Not Available]	[Not Available]	[Not Available]	[Not Available]	NO	[Not Available]	YES	[Not Available]	1	[Not Available]	[Not Available]	[Not Evaluated]	[Not Available]	2	[Not Available]	Pre-Adjuvant Therapy	[Not Applicable]	[Not Available]	[Not Available]	[Not Available]	Complete Remission/Response	[Not Available]	[Not Available]	Cervical Squamous Cell Carcinoma	[Not Available]	[Not Available]
267	CA242B4C-B879-4E13-A1E7-84C984067189	TCGA-VS-A9UB	2014-10-01	NO	YES	-19737	FEMALE	Post (prior bilateral ovariectomy OR >12 mo since LMP with no prior hysterectomy)	166	79	Never Used	[Unknown]	11	[Not Evaluated]	[Not Available]	No	[Not Available]	TUMOR FREE	[Not Available]	11	Alive	562	[Not Applicable]	[Not Available]	[Not Available]	[Not Available]	[Not Available]	NO	[Not Available]	YES	[Not Available]	1	[Not Available]	[Not Available]	[Not Evaluated]	[Not Available]	1	[Not Available]	Preoperative	[Not Applicable]	[Not Available]	[Not Available]	[Not Available]	Complete Remission/Response	[Not Available]	[Not Available]	Cervical Squamous Cell Carcinoma	[Not Available]	[Not Available]
268	CCA23650-1B06-4977-91E8-F35E73E70C48	TCGA-VS-A9UC	2014-08-11	NO	YES	-11790	FEMALE	Peri (6-12 months since last menstrual period)	153	76	Never Used	[Unknown]	4	[Not Evaluated]	[Not Available]	No	[Not Available]	WITH TUMOR	[Not Available]	4	Alive	511	[Not Applicable]	[Not Available]	[Not Available]	[Not Available]	[Not Available]	NO	[Not Available]	YES	[Not Available]	1	[Not Available]	[Not Available]	[Not Evaluated]	[Not Available]	1	[Not Available]	Pre-Adjuvant Therapy	[Not Applicable]	[Not Available]	[Not Available]	[Not Available]	Stable Disease	[Not Available]	[Not Available]	Cervical Squamous Cell Carcinoma	[Not Available]	[Not Available]
269	60CFA29F-4770-4EE4-AA37-787F53155662	TCGA-VS-A9UD	2014-08-11	NO	YES	-26815	FEMALE	Post (prior bilateral ovariectomy OR >12 mo since LMP with no prior hysterectomy)	161	64	Never Used	WHITE	9	[Not Evaluated]	[Not Available]	No	[Not Available]	TUMOR FREE	[Not Available]	14	Alive	417	[Not Applicable]	[Not Available]	[Not Available]	5	[Not Available]	NO	[Not Available]	YES	[Not Available]	1	[Not Available]	[Not Available]	[Not Evaluated]	[Not Available]	0	[Not Available]	Pre-Adjuvant Therapy	[Not Applicable]	[Not Available]	[Not Available]	[Not Available]	Complete Remission/Response	[Not Available]	[Not Available]	Cervical Squamous Cell Carcinoma	[Not Available]	[Not Available]
270	6949C03E-067A-49A5-B48D-E9380A1B0B27	TCGA-VS-A9UH	2014-08-20	NO	YES	-19454	FEMALE	[Not Available]	[Not Available]	[Not Available]	Never Used	BLACK OR AFRICAN AMERICAN	3	[Not Evaluated]	[Not Available]	No	[Not Available]	TUMOR FREE	[Not Available]	3	Alive	1120	[Not Applicable]	[Not Available]	[Not Available]	[Not Available]	[Not Available]	NO	[Not Available]	YES	[Not Available]	1	[Not Available]	[Not Available]	[Not Available]	[Not Available]	2	[Not Available]	Pre-Adjuvant Therapy	[Not Applicable]	[Not Available]	[Not Available]	[Not Available]	Complete Remission/Response	[Not Available]	[Not Available]	Cervical Squamous Cell Carcinoma	[Not Available]	[Not Available]
271	9C516D28-BEF2-4334-BDDA-97950BD95AC0	TCGA-VS-A9UI	2014-08-11	NO	YES	-27838	FEMALE	Post (prior bilateral ovariectomy OR >12 mo since LMP with no prior hysterectomy)	[Not Available]	70	Never Used	WHITE	5	[Not Evaluated]	[Not Available]	No	[Not Available]	TUMOR FREE	[Not Available]	5	Alive	953	[Not Applicable]	[Not Available]	[Not Available]	[Not Available]	[Not Available]	NO	[Not Available]	YES	[Not Available]	1	[Not Available]	[Not Available]	[Not Evaluated]	[Not Available]	1	[Not Available]	Pre-Adjuvant Therapy	[Not Applicable]	[Not Available]	[Not Available]	[Not Available]	Complete Remission/Response	[Not Available]	[Not Available]	Cervical Squamous Cell Carcinoma	[Not Available]	[Not Available]
272	78C62970-4B48-4DC4-9042-5F48F42818EC	TCGA-VS-A9UJ	2014-09-09	NO	YES	-20264	FEMALE	Pre (<6 months since LMP AND no prior bilateral ovariectomy AND not on estrogen replacement)	[Not Available]	[Not Available]	Current User	[Unknown]	[Not Available]	[Not Evaluated]	[Not Available]	No	[Not Available]	WITH TUMOR	[Not Available]	0	Dead	[Not Available]	52	Cervical Cancer	[Not Available]	[Not Available]	[Not Available]	[Not Available]	[Not Available]	NO	[Not Available]	1	[Not Available]	[Not Available]	[Not Evaluated]	[Not Available]	1	[Not Available]	Other	No treatment performed	[Not Available]	[Not Available]	[Not Available]	[Not Available]	[Not Available]	[Not Available]	Cervical Squamous Cell Carcinoma	[Not Available]	[Not Available]
273	7ABACA8F-962E-4F9D-B63F-26C131BF5961	TCGA-VS-A9UL	2014-09-05	NO	YES	-29033	FEMALE	Post (prior bilateral ovariectomy OR >12 mo since LMP with no prior hysterectomy)	149	56	Never Used	WHITE	5	[Not Evaluated]	[Not Available]	No	[Not Available]	WITH TUMOR	[Not Available]	5	Dead	[Not Available]	442	Cervical Cancer	[Not Available]	[Not Available]	[Not Available]	NO	[Not Available]	YES	[Not Available]	1	[Not Available]	[Not Available]	[Not Evaluated]	[Not Available]	1	[Not Available]	Pre-Adjuvant Therapy	[Not Applicable]	[Not Available]	[Not Available]	[Not Available]	Progressive Disease	[Not Available]	[Not Available]	Cervical Squamous Cell Carcinoma	[Not Available]	[Not Available]
274	EE2C9743-EAA1-4F0D-8D35-E96686AC3913	TCGA-VS-A9UM	2014-09-09	NO	YES	-14255	FEMALE	Peri (6-12 months since last menstrual period)	160	75	Never Used	BLACK OR AFRICAN AMERICAN	5	[Not Evaluated]	[Not Available]	No	[Not Available]	TUMOR FREE	[Not Available]	5	Dead	[Not Available]	829	[Not Available]	[Not Available]	[Not Available]	[Not Available]	NO	[Not Available]	YES	[Not Available]	1	[Not Available]	[Not Available]	[Not Evaluated]	[Not Available]	0	[Not Available]	Pre-Adjuvant Therapy	[Not Applicable]	[Not Available]	[Not Available]	[Not Available]	Complete Remission/Response	[Not Available]	[Not Available]	Cervical Squamous Cell Carcinoma	[Not Available]	[Not Available]
275	4DA121DA-9193-4AC5-8206-03CB1F7C2C14	TCGA-VS-A9UO	2014-08-11	NO	YES	-15813	FEMALE	Peri (6-12 months since last menstrual period)	159	40	Never Used	WHITE	1	[Not Evaluated]	[Not Available]	No	[Not Available]	TUMOR FREE	[Not Available]	1	Alive	1080	[Not Applicable]	[Not Available]	[Not Available]	[Not Available]	[Not Available]	NO	[Not Available]	YES	[Not Available]	1	[Not Available]	[Not Available]	[Not Evaluated]	[Not Available]	1	[Not Available]	Preoperative	[Not Applicable]	[Not Available]	[Not Available]	[Not Available]	Complete Remission/Response	[Not Available]	[Not Available]	Mucinous Adenocarcinoma of Endocervical Type	[Not Available]	[Not Available]
276	F0CFAACC-30E5-4E54-B33A-F0FD5DAD620E	TCGA-VS-A9UP	2014-08-11	NO	YES	-15849	FEMALE	Peri (6-12 months since last menstrual period)	155	68	Never Used	[Unknown]	4	[Not Evaluated]	[Not Available]	No	[Not Available]	WITH TUMOR	[Not Available]	4	Alive	1150	[Not Applicable]	[Not Available]	[Not Available]	[Not Available]	[Not Available]	NO	[Not Available]	YES	34	2	[Not Available]	1	[Not Evaluated]	[Not Available]	1	[Not Available]	Pre-Adjuvant Therapy	[Not Applicable]	[Not Available]	[Not Available]	[Not Available]	Complete Remission/Response	[Not Available]	[Not Available]	Mucinous Adenocarcinoma of Endocervical Type	[Not Available]	[Not Available]
277	2C600A58-98ED-4572-9B6F-EDBA2719790C	TCGA-VS-A9UQ	2014-08-11	NO	YES	-11853	FEMALE	Peri (6-12 months since last menstrual period)	160	72	Current User	[Unknown]	[Not Available]	[Not Evaluated]	[Not Available]	No	[Not Available]	TUMOR FREE	[Not Available]	4	Alive	920	[Not Applicable]	[Not Available]	[Not Available]	4	[Not Available]	NO	[Not Available]	YES	[Not Available]	1	[Not Available]	[Not Available]	[Not Evaluated]	[Not Available]	[Not Available]	[Not Available]	[Not Available]	[Not Applicable]	[Not Available]	[Not Available]	[Not Available]	Complete Remission/Response	[Not Available]	[Not Available]	Mucinous Adenocarcinoma of Endocervical Type	[Not Available]	[Not Available]
278	ADC60720-AC20-4E73-9C37-3AD3119C07D6	TCGA-VS-A9UR	2014-08-11	NO	YES	-19688	FEMALE	[Unknown]	161	64	Never Used	WHITE	5	[Not Evaluated]	[Not Available]	No	[Not Available]	TUMOR FREE	[Not Available]	5	Alive	455	[Not Applicable]	[Not Available]	[Not Available]	[Not Available]	[Not Available]	NO	[Not Available]	YES	[Not Available]	1	[Not Available]	[Not Available]	[Not Evaluated]	[Not Available]	1	[Not Available]	Pre-Adjuvant Therapy	[Not Applicable]	[Not Available]	[Not Available]	[Not Available]	Complete Remission/Response	[Not Available]	[Not Available]	Mucinous Adenocarcinoma of Endocervical Type	[Not Available]	[Not Available]
279	A945FD96-FFB3-4787-BACD-60DA4560C8A5	TCGA-VS-A9UT	2014-10-01	NO	YES	-26603	FEMALE	Post (prior bilateral ovariectomy OR >12 mo since LMP with no prior hysterectomy)	144	42	Never Used	ASIAN	3	[Not Evaluated]	[Not Available]	No	[Not Available]	TUMOR FREE	[Not Available]	3	Alive	104	[Not Applicable]	[Not Available]	[Not Available]	[Not Available]	[Not Available]	NO	[Not Available]	[Unknown]	[Not Available]	1	[Not Available]	[Not Available]	[Not Evaluated]	[Not Available]	1	[Not Available]	Pre-Adjuvant Therapy	[Not Applicable]	[Not Available]	[Not Available]	[Not Available]	Complete Remission/Response	[Not Available]	[Not Available]	Mucinous Adenocarcinoma of Endocervical Type	[Not Available]	[Not Available]
280	4770EC81-9174-4D2A-AF54-70C00696FB0B	TCGA-VS-A9UU	2014-10-01	NO	YES	-15534	FEMALE	Pre (<6 months since LMP AND no prior bilateral ovariectomy AND not on estrogen replacement)	162	67	Current User	[Unknown]	7	[Not Evaluated]	[Not Available]	No	[Not Available]	TUMOR FREE	[Not Available]	7	Alive	442	[Not Applicable]	[Not Available]	[Not Available]	[Not Available]	[Not Available]	NO	[Not Available]	YES	23	2	[Not Available]	2	HIV	[Not Available]	0	[Not Available]	Pre-Adjuvant Therapy	[Not Applicable]	[Not Available]	[Not Available]	[Not Available]	Complete Remission/Response	[Not Available]	[Not Available]	Cervical Squamous Cell Carcinoma	[Not Available]	[Not Available]
281	C9E4BAC6-0CAC-4FCA-A548-527DEAC5B880	TCGA-VS-A9UV	2014-08-11	NO	YES	-27348	FEMALE	Post (prior bilateral ovariectomy OR >12 mo since LMP with no prior hysterectomy)	152	31	Never Used	[Unknown]	5	[Not Evaluated]	[Not Available]	No	[Not Available]	WITH TUMOR	[Not Available]	5	Dead	[Not Available]	104	Cervical Cancer	[Not Available]	[Not Available]	[Not Available]	NO	[Not Available]	NO	[Not Available]	1	[Not Available]	[Not Available]	[Not Evaluated]	[Not Available]	1	[Not Available]	Other	The patient did not perform treatment	[Not Available]	[Not Available]	[Not Available]	[Unknown]	[Not Available]	[Not Available]	Cervical Squamous Cell Carcinoma	[Not Available]	[Not Available]
282	A1B99260-8643-4CEF-95A0-3853D64762B7	TCGA-VS-A9UY	2014-09-05	NO	YES	-10707	FEMALE	[Unknown]	163	46	[Unknown]	[Unknown]	[Not Available]	[Not Evaluated]	[Not Available]	No	[Not Available]	WITH TUMOR	[Not Available]	[Not Available]	Dead	[Not Available]	555	Cervical Cancer	[Not Available]	[Not Available]	[Not Available]	NO	[Not Available]	YES	[Not Available]	1	[Not Available]	[Not Available]	[Not Evaluated]	[Not Available]	2	[Not Available]	Pre-Adjuvant Therapy	[Not Applicable]	[Not Available]	[Not Available]	[Not Available]	Progressive Disease	[Not Available]	[Not Available]	Cervical Squamous Cell Carcinoma	[Not Available]	[Not Available]
283	6817BB3E-1F8A-457C-9AB0-31CCDA8B6868	TCGA-VS-A9UZ	2014-08-20	NO	YES	-22344	FEMALE	Peri (6-12 months since last menstrual period)	149	54	Never Used	WHITE	4	[Not Evaluated]	[Not Available]	No	[Not Available]	TUMOR FREE	[Not Available]	4	Alive	1939	[Not Applicable]	[Not Available]	[Not Available]	[Not Available]	[Not Available]	NO	[Not Available]	YES	[Not Available]	1	[Not Available]	[Not Available]	[Not Evaluated]	[Not Available]	[Not Available]	[Not Available]	[Not Available]	[Not Applicable]	[Not Available]	[Not Available]	[Not Available]	Complete Remission/Response	[Not Available]	[Not Available]	Mucinous Adenocarcinoma of Endocervical Type	[Not Available]	[Not Available]
284	A5885835-9473-455A-BAC0-6FA43FA8A866	TCGA-VS-A9V0	2014-10-01	NO	YES	-21215	FEMALE	Pre (<6 months since LMP AND no prior bilateral ovariectomy AND not on estrogen replacement)	158	76	Never Used	[Unknown]	7	[Not Evaluated]	[Not Available]	No	[Not Available]	WITH TUMOR	[Not Available]	7	Alive	529	[Not Applicable]	[Not Available]	[Not Available]	[Not Available]	[Not Available]	NO	[Not Available]	YES	27	4	2012	4.5	[Not Evaluated]	[Not Available]	[Not Available]	[Not Available]	[Not Available]	[Not Applicable]	[Not Available]	[Not Available]	[Not Available]	Complete Remission/Response	[Not Available]	[Not Available]	Mucinous Adenocarcinoma of Endocervical Type	[Not Available]	[Not Available]
285	A6A07BC7-AB1B-429D-81ED-D7A890C88E51	TCGA-VS-A9V1	2014-09-05	NO	YES	-17001	FEMALE	Pre (<6 months since LMP AND no prior bilateral ovariectomy AND not on estrogen replacement)	155	45	Never Used	WHITE	3	[Not Evaluated]	[Not Available]	No	[Not Available]	WITH TUMOR	[Not Available]	4	Dead	[Not Available]	157	Cervical Cancer	[Not Available]	1	[Not Available]	NO	[Not Available]	YES	24	2	[Not Available]	2.4	[Not Evaluated]	[Not Available]	[Not Available]	[Not Available]	[Not Available]	[Not Applicable]	[Not Available]	[Not Available]	[Not Available]	Progressive Disease	[Not Available]	[Not Available]	Mucinous Adenocarcinoma of Endocervical Type	[Not Available]	[Not Available]
286	03804F9B-DF7C-462C-8984-8EB3A5ED4999	TCGA-VS-A9V2	2014-09-05	NO	YES	-10637	FEMALE	Peri (6-12 months since last menstrual period)	156	49	Never Used	WHITE	2	[Not Evaluated]	[Not Available]	No	[Not Available]	TUMOR FREE	[Not Available]	2	Alive	237	[Not Applicable]	[Not Available]	[Not Available]	[Not Available]	[Not Available]	NO	[Not Available]	YES	[Not Available]	1	[Not Available]	[Not Available]	[Not Available]	[Not Available]	1	[Not Available]	Preoperative	[Not Applicable]	[Not Available]	[Not Available]	[Not Available]	Complete Remission/Response	[Not Available]	[Not Available]	Cervical Squamous Cell Carcinoma	[Not Available]	[Not Available]
287	1CB1D2CA-DFA6-4C42-9DA9-C711DC5AAB5D	TCGA-VS-A9V3	2014-08-11	NO	YES	-22990	FEMALE	[Not Evaluated]	164	60	Former User	WHITE	[Not Available]	[Not Evaluated]	[Not Available]	No	[Not Available]	TUMOR FREE	[Not Available]	0	Alive	253	[Not Applicable]	[Not Available]	[Not Available]	[Not Available]	[Not Available]	NO	[Not Available]	YES	[Not Available]	1	[Not Available]	[Not Available]	[Not Evaluated]	[Not Available]	1	[Not Available]	Pre-Adjuvant Therapy	[Not Applicable]	[Not Available]	[Not Available]	[Not Available]	Complete Remission/Response	[Not Available]	[Not Available]	Cervical Squamous Cell Carcinoma	[Not Available]	[Not Available]
288	778389BA-C2E9-47D4-B133-6F4D0E689B34	TCGA-VS-A9V4	2014-10-01	NO	YES	-23334	FEMALE	Post (prior bilateral ovariectomy OR >12 mo since LMP with no prior hysterectomy)	161	52	[Not Available]	WHITE	3	[Not Evaluated]	[Not Available]	No	[Not Available]	WITH TUMOR	[Not Available]	3	Dead	[Not Available]	132	Cervical Cancer	[Not Available]	[Not Available]	[Not Available]	NO	[Not Available]	YES	15	4	2013	30	[Not Evaluated]	[Not Available]	2	[Not Available]	Pre-Adjuvant Therapy	[Not Applicable]	[Not Available]	[Not Available]	[Not Available]	[Unknown]	[Not Available]	[Not Available]	Mucinous Adenocarcinoma of Endocervical Type	[Not Available]	[Not Available]
289	D3FF2AEB-46BE-4F54-8A8F-178EB921FBB6	TCGA-VS-A9V5	2014-10-01	NO	YES	-18577	FEMALE	Pre (<6 months since LMP AND no prior bilateral ovariectomy AND not on estrogen replacement)	157	98	Never Used	WHITE	1	[Not Evaluated]	[Not Available]	No	[Not Available]	WITH TUMOR	[Not Available]	1	Dead	[Not Available]	494	[Not Available]	[Not Available]	[Not Available]	[Not Available]	NO	[Not Available]	YES	[Not Available]	1	[Not Available]	[Not Available]	[Not Evaluated]	[Not Available]	1	[Not Available]	Pre-Adjuvant Therapy	[Not Applicable]	[Not Available]	[Not Available]	[Not Available]	Progressive Disease	[Not Available]	[Not Available]	Mucinous Adenocarcinoma of Endocervical Type	[Not Available]	[Not Available]
290	173174F8-9D95-40B0-9F88-A4BF4CCB521B	TCGA-VS-AA62	2014-11-13	NO	YES	-18792	FEMALE	Peri (6-12 months since last menstrual period)	156	67	Current User	WHITE	4	[Not Evaluated]	[Not Available]	No	[Not Available]	WITH TUMOR	[Not Available]	4	Dead	[Not Available]	469	Cervical Cancer	[Not Available]	[Not Available]	[Not Available]	NO	[Not Available]	YES	[Not Available]	1	[Not Available]	[Not Available]	[Not Evaluated]	[Not Available]	0	[Not Available]	Pre-Adjuvant Therapy	[Not Applicable]	[Not Available]	[Not Available]	[Not Available]	Progressive Disease	[Not Available]	[Not Available]	Cervical Squamous Cell Carcinoma	[Not Available]	[Not Available]
291	48D81B1E-CD75-4B55-A0B2-C331BE2A88AE	TCGA-WL-A834	2014-03-06	NO	YES	[Not Available]	FEMALE	Pre (<6 months since LMP AND no prior bilateral ovariectomy AND not on estrogen replacement)	162	79	Former User	WHITE	2	NOT HISPANIC OR LATINO	[Not Available]	No	[Not Available]	TUMOR FREE	[Not Available]	3	Alive	549	[Not Applicable]	[Not Available]	[Not Available]	[Not Available]	[Not Available]	NO	[Not Available]	YES	43	4	2012	6.5	[Not Available]	[Not Available]	[Not Available]	[Not Available]	[Not Available]	[Not Applicable]	[Not Available]	[Not Available]	[Not Available]	[Not Available]	[Not Available]	[Not Available]	Cervical Squamous Cell Carcinoma	[Not Available]	[Not Available]
292	FFD8D31F-BC4B-4E19-BBAF-0E26E9F3A107	TCGA-XS-A8TJ	2014-07-28	YES	NO	-15298	FEMALE	Pre (<6 months since LMP AND no prior bilateral ovariectomy AND not on estrogen replacement)	146	51	Former User	BLACK OR AFRICAN AMERICAN	1	HISPANIC OR LATINO	[Not Available]	No	1	TUMOR FREE	[Not Available]	2	Alive	890	[Not Applicable]	[Not Available]	[Not Available]	[Not Available]	[Not Available]	NO	[Not Available]	YES	[Not Available]	5	[Not Available]	[Not Available]	[Not Available]	[Not Available]	0	[Not Available]	Preoperative	[Not Applicable]	[Not Available]	[Not Available]	[Not Available]	Complete Remission/Response	[Not Available]	[Not Available]	Cervical Squamous Cell Carcinoma	[Not Available]	[Not Available]
293	EB3BA1FB-8254-4C02-A982-507F075CBAC1	TCGA-ZJ-A8QO	2014-12-19	NO	YES	-26723	FEMALE	[Unknown]	[Not Available]	[Not Available]	[Unknown]	[Unknown]	[Not Available]	[Unknown]	[Not Available]	No	[Not Available]	[Unknown]	[Not Available]	[Not Available]	Alive	0	[Not Applicable]	[Not Available]	[Not Available]	[Not Available]	[Not Available]	[Not Available]	[Not Available]	[Unknown]	[Not Available]	[Unknown]	[Not Available]	[Not Available]	[Unknown]	[Not Available]	[Not Available]	[Not Available]	[Not Available]	[Not Applicable]	[Not Available]	[Not Available]	[Not Available]	[Unknown]	[Not Available]	[Not Available]	Cervical Squamous Cell Carcinoma	[Not Available]	[Not Available]
294	B12DEB95-6AA1-49CB-A3C5-A711D42D6FB9	TCGA-ZJ-A8QQ	2014-02-25	NO	YES	-8918	FEMALE	Post (prior bilateral ovariectomy OR >12 mo since LMP with no prior hysterectomy)	158	71	Never Used	WHITE	[Not Available]	NOT HISPANIC OR LATINO	[Not Available]	No	[Not Available]	TUMOR FREE	[Not Available]	0	Alive	2056	[Not Applicable]	[Not Available]	[Not Available]	[Not Available]	[Not Available]	NO	[Not Available]	YES	11	2	[Not Available]	20	[Not Available]	[Not Available]	0	[Not Available]	Preoperative	[Not Applicable]	[Not Available]	[Not Available]	[Not Available]	Complete Remission/Response	[Not Available]	[Not Available]	Cervical Squamous Cell Carcinoma	[Not Available]	[Not Available]
295	DB44488E-4ED0-4082-BCA0-BBFD22FF0537	TCGA-ZJ-A8QR	2014-02-25	NO	YES	-14225	FEMALE	Pre (<6 months since LMP AND no prior bilateral ovariectomy AND not on estrogen replacement)	[Not Available]	58	[Unknown]	NATIVE HAWAIIAN OR OTHER PACIFIC ISLANDER	[Not Available]	NOT HISPANIC OR LATINO	[Not Available]	No	[Not Available]	[Unknown]	[Not Available]	[Not Available]	Dead	[Not Available]	582	[Unknown]	[Not Available]	[Not Available]	[Not Available]	NO	[Not Available]	[Unknown]	36	2	2009	0.4	[Not Available]	[Not Available]	0	[Not Available]	Preoperative	[Not Applicable]	[Not Available]	[Not Available]	[Not Available]	[Unknown]	[Not Available]	[Not Available]	Cervical Squamous Cell Carcinoma	[Not Available]	[Not Available]
296	13D72130-604C-4D79-95CC-53C2E25D91B0	TCGA-ZJ-AAX4	2014-12-19	NO	YES	-31258	FEMALE	[Unknown]	170	77	Never Used	WHITE	3	NOT HISPANIC OR LATINO	[Not Available]	No	[Not Available]	[Unknown]	[Not Available]	3	Alive	21	[Not Applicable]	[Not Available]	[Not Available]	[Not Available]	[Not Available]	[Not Available]	[Not Available]	[Unknown]	23	4	1949	0.57	[Unknown]	[Not Available]	[Not Available]	[Not Available]	[Not Available]	[Not Applicable]	[Not Available]	[Not Available]	[Not Available]	[Unknown]	[Not Available]	[Not Available]	Cervical Squamous Cell Carcinoma	[Not Available]	[Not Available]
297	B5F0E361-D67D-4FA9-9916-43623DAFB10F	TCGA-ZJ-AAX8	2014-12-19	NO	YES	-21481	FEMALE	[Unknown]	[Not Available]	[Not Available]	[Unknown]	[Unknown]	[Not Available]	[Unknown]	[Not Available]	No	[Not Available]	[Unknown]	[Not Available]	[Not Available]	Alive	0	[Not Applicable]	[Not Available]	[Not Available]	[Not Available]	[Not Available]	[Not Available]	[Not Available]	[Unknown]	[Not Available]	[Not Available]	[Not Available]	[Not Available]	[Unknown]	[Not Available]	[Not Available]	[Not Available]	[Not Available]	[Not Applicable]	[Not Available]	[Not Available]	[Not Available]	[Unknown]	[Not Available]	[Not Available]	Cervical Squamous Cell Carcinoma	[Not Available]	[Not Available]
298	E8DE2228-3AAA-48AD-A2E4-2940280AF6FD	TCGA-ZJ-AAXA	2014-12-30	NO	YES	-23603	FEMALE	[Unknown]	155	78	[Unknown]	WHITE	4	NOT HISPANIC OR LATINO	[Not Available]	No	[Not Available]	[Unknown]	[Not Available]	4	Alive	43	[Not Applicable]	[Not Available]	[Not Available]	[Not Available]	[Not Available]	[Not Available]	[Not Available]	[Unknown]	18	3	1989	26	[Unknown]	[Not Available]	[Not Available]	[Not Available]	[Not Available]	[Not Applicable]	[Not Available]	[Not Available]	[Not Available]	[Unknown]	[Not Available]	[Not Available]	Cervical Squamous Cell Carcinoma	[Not Available]	[Not Available]
299	88F0AA4A-6BFD-4573-B136-58F84F867F10	TCGA-ZJ-AAXB	2014-12-31	NO	YES	-15492	FEMALE	[Unknown]	163	97	[Unknown]	WHITE	3	NOT HISPANIC OR LATINO	[Not Available]	No	[Not Available]	[Unknown]	[Not Available]	3	Alive	0	[Not Applicable]	[Not Available]	[Not Available]	[Not Available]	[Not Available]	[Not Available]	[Not Available]	[Unknown]	[Not Available]	1	[Not Available]	[Not Available]	[Unknown]	[Not Available]	[Not Available]	[Not Available]	[Not Available]	[Not Applicable]	[Not Available]	[Not Available]	[Not Available]	[Unknown]	[Not Available]	[Not Available]	Endocervical Adenocarcinoma of the Usual Type	[Not Available]	[Not Available]
300	AF33DF2E-9737-4F63-952C-858A70AA589C	TCGA-ZJ-AAXD	2014-12-30	NO	YES	-12968	FEMALE	[Unknown]	[Not Available]	[Not Available]	[Unknown]	[Unknown]	[Not Available]	[Unknown]	[Not Available]	No	[Not Available]	[Unknown]	[Not Available]	[Not Available]	Alive	0	[Not Applicable]	[Not Available]	[Not Available]	[Not Available]	[Not Available]	[Not Available]	[Not Available]	[Unknown]	[Not Available]	[Unknown]	[Not Available]	[Not Available]	[Unknown]	[Not Available]	[Not Available]	[Not Available]	[Not Available]	[Not Applicable]	[Not Available]	[Not Available]	[Not Available]	[Unknown]	[Not Available]	[Not Available]	Cervical Squamous Cell Carcinoma	[Not Available]	[Not Available]
301	0ACD1E47-1099-469B-A6D4-E00DB47F57A9	TCGA-ZJ-AAXF	2015-01-28	NO	YES	-22709	FEMALE	[Unknown]	[Not Available]	[Not Available]	[Unknown]	[Unknown]	[Not Available]	[Unknown]	[Not Available]	No	[Not Available]	[Unknown]	[Not Available]	[Not Available]	Alive	0	[Not Applicable]	[Not Available]	[Not Available]	[Not Available]	[Not Available]	[Not Available]	[Not Available]	[Unknown]	[Not Available]	[Unknown]	[Not Available]	[Not Available]	[Unknown]	[Not Available]	[Not Available]	[Not Available]	[Not Available]	[Not Applicable]	[Not Available]	[Not Available]	[Not Available]	[Unknown]	[Not Available]	[Not Available]	Cervical Squamous Cell Carcinoma	[Not Available]	[Not Available]
302	40A86987-E77F-4977-92B1-8217796E1938	TCGA-ZJ-AAXI	2014-12-31	NO	YES	-24497	FEMALE	[Unknown]	[Not Available]	[Not Available]	[Unknown]	[Unknown]	[Not Available]	[Unknown]	[Not Available]	No	[Not Available]	[Unknown]	[Not Available]	[Not Available]	Alive	0	[Not Applicable]	[Not Available]	[Not Available]	[Not Available]	[Not Available]	[Not Available]	[Not Available]	[Unknown]	[Not Available]	[Unknown]	[Not Available]	[Not Available]	[Unknown]	[Not Available]	[Not Available]	[Not Available]	[Not Available]	[Not Applicable]	[Not Available]	[Not Available]	[Not Available]	[Unknown]	[Not Available]	[Not Available]	Cervical Squamous Cell Carcinoma	[Not Available]	[Not Available]
303	6B60BF8E-29A1-4C6B-9EAD-AEA4DDC99064	TCGA-ZJ-AAXJ	2014-12-31	NO	YES	-16007	FEMALE	[Unknown]	[Not Available]	[Not Available]	[Unknown]	[Unknown]	[Not Available]	[Unknown]	[Not Available]	No	[Not Available]	[Unknown]	[Not Available]	[Not Available]	Alive	0	[Not Applicable]	[Not Available]	[Not Available]	[Not Available]	[Not Available]	[Not Available]	[Not Available]	[Unknown]	[Not Available]	[Unknown]	[Not Available]	[Not Available]	[Unknown]	[Not Available]	[Not Available]	[Not Available]	[Not Available]	[Not Applicable]	[Not Available]	[Not Available]	[Not Available]	[Unknown]	[Not Available]	[Not Available]	Cervical Squamous Cell Carcinoma	[Not Available]	[Not Available]
304	5F22E050-C172-4F2D-A1F9-6CB749B6EF98	TCGA-ZJ-AAXN	2014-12-31	NO	YES	-12701	FEMALE	[Unknown]	173	59	[Unknown]	WHITE	1	NOT HISPANIC OR LATINO	[Not Available]	No	[Not Available]	[Unknown]	[Not Available]	1	Alive	0	[Not Applicable]	[Not Available]	[Not Available]	[Not Available]	[Not Available]	[Not Available]	[Not Available]	[Unknown]	21	2	[Not Available]	2.1	[Unknown]	[Not Available]	[Not Available]	[Not Available]	[Not Available]	[Not Applicable]	[Not Available]	[Not Available]	[Not Available]	[Unknown]	[Not Available]	[Not Available]	Cervical Squamous Cell Carcinoma	[Not Available]	[Not Available]
305	5916AF71-0262-42CF-AF4B-EAC830A8B419	TCGA-ZJ-AAXT	2014-12-31	NO	YES	-19847	FEMALE	[Unknown]	165	76	[Unknown]	WHITE	3	NOT HISPANIC OR LATINO	[Not Available]	No	[Not Available]	[Unknown]	[Not Available]	3	Alive	0	[Not Applicable]	[Not Available]	[Not Available]	[Not Available]	[Not Available]	[Not Available]	[Not Available]	[Unknown]	20	4	1982	0.2	[Unknown]	[Not Available]	[Not Available]	[Not Available]	[Not Available]	[Not Applicable]	[Not Available]	[Not Available]	[Not Available]	[Unknown]	[Not Available]	[Not Available]	Cervical Squamous Cell Carcinoma	[Not Available]	[Not Available]
306	DDD4B6D2-5BE0-4EDD-977A-A795EEA3C738	TCGA-ZJ-AAXU	2014-12-19	NO	YES	-18773	FEMALE	[Unknown]	165	70	[Unknown]	WHITE	[Not Available]	NOT HISPANIC OR LATINO	[Not Available]	No	[Not Available]	[Unknown]	[Not Available]	0	Alive	5	[Not Applicable]	[Not Available]	[Not Available]	[Not Available]	[Not Available]	[Not Available]	[Not Available]	[Unknown]	15	2	[Not Available]	52.86	[Unknown]	[Not Available]	[Not Available]	[Not Available]	[Not Available]	[Not Applicable]	[Not Available]	[Not Available]	[Not Available]	[Unknown]	[Not Available]	[Not Available]	Cervical Squamous Cell Carcinoma	[Not Available]	[Not Available]
307	F0DAF315-8909-4CDA-886D-A2770B08DB94	TCGA-ZJ-AB0H	2014-12-19	NO	YES	-17869	FEMALE	[Unknown]	[Not Available]	[Not Available]	[Unknown]	[Unknown]	[Not Available]	[Unknown]	[Not Available]	No	[Not Available]	[Unknown]	[Not Available]	[Not Available]	Alive	0	[Not Applicable]	[Not Available]	[Not Available]	[Not Available]	[Not Available]	[Not Available]	[Not Available]	[Unknown]	[Not Available]	[Unknown]	[Not Available]	[Not Available]	[Unknown]	[Not Available]	[Not Available]	[Not Available]	[Not Available]	[Not Applicable]	[Not Available]	[Not Available]	[Not Available]	[Unknown]	[Not Available]	[Not Available]	Cervical Squamous Cell Carcinoma	[Not Available]	[Not Available]
308	A4F13656-A941-498A-9AC9-F020ED559B35	TCGA-ZJ-AB0I	2014-12-19	NO	YES	-9486	FEMALE	[Unknown]	173	78	Never Used	WHITE	4	NOT HISPANIC OR LATINO	[Not Available]	No	[Not Available]	[Unknown]	[Not Available]	4	Alive	0	[Not Applicable]	[Not Available]	[Not Available]	[Not Available]	[Not Available]	[Not Available]	[Not Available]	[Unknown]	13	4	2006	13	[Unknown]	[Not Available]	[Not Available]	[Not Available]	[Not Available]	[Not Applicable]	[Not Available]	[Not Available]	[Not Available]	[Unknown]	[Not Available]	[Not Available]	Cervical Squamous Cell Carcinoma	[Not Available]	[Not Available]
309	4756ACC0-4E96-44D4-B359-04D64DC7EB84	TCGA-ZX-AA5X	2014-11-24	YES	NO	-23440	FEMALE	Post (prior bilateral ovariectomy OR >12 mo since LMP with no prior hysterectomy)	157	56	[Unknown]	WHITE	2	NOT HISPANIC OR LATINO	0	No	0	WITH TUMOR	0	2	Alive	119	[Not Applicable]	[Not Available]	[Not Available]	0	[Not Available]	NO	[Not Available]	[Unknown]	[Not Available]	1	[Not Available]	[Not Available]	Other, specify	Positive for Hepatitis A	1	[Not Available]	Pre-Adjuvant Therapy	[Not Applicable]	[Not Available]	[Not Available]	[Not Available]	[Not Applicable]	[Not Available]	[Not Available]	Cervical Squamous Cell Carcinoma	[Not Available]	[Not Available]
[truncated: 95 more columns]
