# Supplementary material for: Molecular Differences between Squamous Cell Carcinoma and Adenocarcinoma Cervical Cancer Subtypes: Potential Prognostic Biomarkers
Source: Curr Oncol. 2022 Jul 5;29(7):4689–702. doi: 10.3390/curroncol29070372 (PMC9322365; doi:10.3390/curroncol29070372)
Supplement: Supplementary file 1 [file curroncol-29-00372-s001.zip › Table_S2.xlsx]

## Sheet: Hoja1
Table S2. HPV data from Mexican-Mestizo cohort at diagnosis
Patients	HPV type	Percentage (%)
27	16	45
2	16/18	3.33333
1	16/31/59	1.66667
1	16/33/52	1.66667
1	16/35/52	1.66667
6	18	10
1	31	1.66667
1	33	1.66667
3	39	5
9	45	15
1	45/51	1.66667
1	51	1.66667
4	58/52	6.66667
1	58/52/45	1.66667
1	6	1.66667
