# Supplementary material for: Molecular Differences between Squamous Cell Carcinoma and Adenocarcinoma Cervical Cancer Subtypes: Potential Prognostic Biomarkers
Source: Curr Oncol. 2022 Jul 5;29(7):4689–702. doi: 10.3390/curroncol29070372 (PMC9322365; doi:10.3390/curroncol29070372)
Supplement: Supplementary file 1 [file curroncol-29-00372-s001.zip › Table_S3.csv]

Table S3. Differential expressed genes between the two histological types in TCGA cohort
Gene	baseMean	log2FoldChange	lfcSE	stat	pvalue	padj	SYMBOL
ENSG00000134193	298.4525365	8.409041441	0.424538851	19.80747208	2.57E-87	1.26E-83	REG4
ENSG00000169903	426.6493751	8.268782072	0.50721486	16.30232614	9.50E-60	6.89E-57	TM4SF4
ENSG00000146399	49.7738025	7.537857419	0.680328495	11.07973204	1.57E-28	1.39E-26	TAAR1
ENSG00000163586	79.367249	7.516989863	0.963794084	7.799373323	6.22E-15	1.36E-13	FABP1
ENSG00000146039	21.22622947	7.42007571	0.813443144	9.121812339	7.39E-20	2.85E-18	SLC17A4
ENSG00000167117	17.67253686	7.318058967	0.449136993	16.29360101	1.10E-59	7.81E-57	ANKRD40CL
ENSG00000277837	7.103820711	7.142719869	0.567052746	12.59621776	2.22E-36	3.54E-34	NA
ENSG00000115386	221.3791818	6.774628449	0.743377375	9.113309978	7.99E-20	3.07E-18	REG1A
ENSG00000172023	5.147399804	6.650270457	1.288666014	5.160584963	2.46E-07	1.82E-06	REG1B
ENSG00000257743	98.0380306	6.6263032	0.533218214	12.42700086	1.87E-35	2.78E-33	MGAM2
ENSG00000237070	5.763267375	6.566671848	0.877029012	7.487405501	7.02E-14	1.37E-12	LOC105375166
ENSG00000169876	15.73067882	6.565963969	0.559361324	11.73832313	8.11E-32	9.66E-30	MUC17
ENSG00000275718	33.53958781	6.329374417	0.456486763	13.86540624	1.03E-43	2.59E-41	CCL15
ENSG00000139540	138.037528	6.260462199	0.244830729	25.57057365	3.24E-144	1.27E-139	SLC39A5
ENSG00000231013	15.04470052	6.226843491	0.491910838	12.65847998	1.00E-36	1.63E-34	SCTR-AS1
ENSG00000079112	605.5803099	6.201465738	0.337370299	18.38177738	1.84E-75	4.80E-72	CDH17
ENSG00000169347	34.07852757	6.175893786	0.71165805	8.678175969	4.02E-18	1.30E-16	GP2
ENSG00000230707	9.65823078	6.126599494	0.902934397	6.785209995	1.16E-11	1.70E-10	NA
ENSG00000100604	464.7128941	6.094477355	0.430076693	14.17067574	1.39E-45	4.28E-43	CHGA
ENSG00000114455	142.1442646	5.922825494	0.455079112	13.01493595	1.01E-38	1.91E-36	HHLA2
ENSG00000226812	9.546012873	5.841661179	0.638083204	9.155014802	5.44E-20	2.12E-18	NA
ENSG00000090402	6.717657202	5.826548482	0.656083365	8.880805078	6.64E-19	2.32E-17	SI
ENSG00000165556	161.567836	5.802064107	0.643096338	9.022076106	1.85E-19	6.76E-18	CDX2
ENSG00000189325	77.15178279	5.761850089	0.362649599	15.88820202	7.65E-57	4.68E-54	BNIP5
ENSG00000168515	3.222484559	5.72009772	0.985201471	5.806018253	6.40E-09	6.29E-08	SCGB1D1
ENSG00000138079	149.3312364	5.643811713	0.319178697	17.68229449	5.74E-70	9.00E-67	SLC3A1
ENSG00000135100	78.39693557	5.636434757	0.400520337	14.07278041	5.58E-45	1.60E-42	HNF1A
ENSG00000163286	201.4856041	5.621798712	0.46484105	12.09402377	1.14E-33	1.51E-31	ALPG
ENSG00000171747	1498.270813	5.587303726	0.376933025	14.82306765	1.04E-49	4.16E-47	LGALS4
ENSG00000009765	82.57996895	5.565375574	0.360855436	15.42272891	1.15E-53	5.78E-51	IYD
ENSG00000255545	98.05622384	5.531853732	0.481241609	11.49496142	1.40E-30	1.51E-28	B3GAT1-DT
ENSG00000198889	59.55897369	5.525801491	0.855086674	6.462270616	1.03E-10	1.33E-09	DCAF12L1
ENSG00000137251	8.824782302	5.516618598	0.69463422	7.94176048	1.99E-15	4.68E-14	TINAG
ENSG00000101076	436.9808233	5.49758256	0.429427926	12.80210769	1.60E-37	2.78E-35	HNF4A
ENSG00000184434	45.27688558	5.489306224	0.266395045	20.6058871	2.43E-94	2.38E-90	LRRC19
ENSG00000204876	32.81217008	5.473035059	0.497050586	11.01102224	3.38E-28	2.92E-26	LOC389602
ENSG00000124939	1435.860203	5.471217315	0.476089571	11.49199152	1.45E-30	1.55E-28	SCGB2A1
ENSG00000165376	305.5054882	5.468228337	0.360742497	15.15825938	6.68E-52	2.98E-49	CLDN2
ENSG00000099834	316.3612601	5.454587684	0.389445363	14.00604092	1.43E-44	3.90E-42	CDHR5
ENSG00000198758	628.4227975	5.4503922	0.482448875	11.29734668	1.35E-29	1.31E-27	EPS8L3
ENSG00000187783	13.56349123	5.401642681	0.466857341	11.57022114	5.83E-31	6.53E-29	TMEM72
ENSG00000260963	2.368573586	5.351331176	0.601116412	8.902320857	5.47E-19	1.93E-17	LOC105371264
ENSG00000197408	79.05142943	5.351298968	0.545958604	9.801656982	1.11E-22	5.86E-21	CYP2B6
ENSG00000100665	154.3692009	5.316767253	0.698882787	7.607523543	2.79E-14	5.69E-13	SERPINA4
ENSG00000111701	11.09201734	5.306209082	0.743686336	7.135009513	9.68E-13	1.64E-11	APOBEC1
ENSG00000225329	33.48851202	5.288796879	0.455123652	11.62057137	3.24E-31	3.70E-29	LHFPL3-AS2
ENSG00000166866	191.7827595	5.249976975	0.297046678	17.67391244	6.66E-70	1.00E-66	MYO1A
ENSG00000279017	14.01449211	5.237056248	0.418421201	12.51623063	6.09E-36	9.39E-34	NA
ENSG00000160181	288.3610341	5.193629091	0.604612473	8.59001314	8.70E-18	2.70E-16	TFF2
ENSG00000229719	45.66598409	5.183446318	0.287275639	18.04345937	8.88E-73	1.83E-69	NA
ENSG00000143167	245.0411758	5.154213309	0.321048593	16.05430896	5.33E-58	3.48E-55	GPA33
ENSG00000004848	42.19352847	5.13852803	0.404565414	12.70135273	5.81E-37	9.65E-35	ARX
ENSG00000180745	136.0337555	5.129354952	0.549841401	9.328789972	1.07E-20	4.49E-19	CLRN3
ENSG00000204983	29.32981528	5.127779491	0.532219492	9.634708177	5.71E-22	2.76E-20	PRSS1
ENSG00000185176	4.358773912	5.123739985	0.604959491	8.469558802	2.46E-17	7.26E-16	AQP12B
ENSG00000148702	201.847438	5.117787137	0.385044863	13.29140481	2.60E-40	5.38E-38	HABP2
ENSG00000163817	347.5243537	5.117624339	0.375317998	13.63543547	2.47E-42	5.82E-40	SLC6A20
ENSG00000162896	21358.59965	5.111218254	0.440100092	11.61376319	3.51E-31	4.00E-29	PIGR
ENSG00000148584	19.16511841	5.075576103	0.377401076	13.44875897	3.13E-41	6.78E-39	A1CF
ENSG00000263588	1.295764865	5.050381556	0.8219699	6.144241484	8.03E-10	9.08E-09	NA
ENSG00000243709	149.0906764	5.050284738	0.384283063	13.14209556	1.89E-39	3.74E-37	LEFTY1
ENSG00000123838	934.6765571	5.030797287	0.544642197	9.236884896	2.54E-20	1.02E-18	C4BPA
ENSG00000232153	1.622539014	5.022833102	0.689079124	7.289196449	3.12E-13	5.63E-12	NA
ENSG00000044012	5.023354049	5.01909551	0.648421955	7.740477429	9.90E-15	2.12E-13	GUCA2B
ENSG00000172238	4.390370703	5.014401258	0.628274933	7.981221272	1.45E-15	3.46E-14	ATOH1
ENSG00000241224	1.340895507	5.008970365	0.932118067	5.373750968	7.71E-08	6.26E-07	C3orf85
ENSG00000184945	1.915383148	5.003774458	0.591097156	8.465231827	2.56E-17	7.52E-16	AQP12A
ENSG00000224417	8.776353929	5.000124488	0.619832466	8.066896719	7.21E-16	1.79E-14	NA
ENSG00000178828	48.6021056	4.969028699	0.594721645	8.355217505	6.53E-17	1.84E-15	RNF186
ENSG00000166558	24.47248618	4.945829423	0.519766845	9.515476921	1.81E-21	8.24E-20	SLC38A8
ENSG00000104537	47.31584744	4.921593995	0.385964932	12.75140196	3.06E-37	5.24E-35	ANXA13
ENSG00000172367	40.12475262	4.907488396	0.318886896	15.3894326	1.93E-53	9.56E-51	PDZD3
ENSG00000124915	5.154893066	4.902532325	0.337472978	14.52718484	8.15E-48	2.88E-45	MYRF-AS1
ENSG00000233041	7.484789912	4.899689389	0.723307394	6.774007051	1.25E-11	1.83E-10	PHGR1
ENSG00000250348	1.953753915	4.897194488	0.519425669	9.428094873	4.18E-21	1.83E-19	NA
ENSG00000127831	621.6609197	4.876669939	0.515967814	9.451500287	3.34E-21	1.47E-19	VIL1
ENSG00000161055	1004.272777	4.868783552	0.486488053	10.00802286	1.41E-23	8.06E-22	SCGB3A1
ENSG00000254404	1.661941059	4.847861313	0.853269521	5.681512339	1.34E-08	1.24E-07	NA
ENSG00000114248	168.3102491	4.834760582	0.545131982	8.868972543	7.38E-19	2.57E-17	LRRC31
ENSG00000175311	167.1646328	4.701447445	0.569292315	8.258406665	1.48E-16	3.99E-15	ANKS4B
ENSG00000132437	92.72423349	4.681570979	0.420360762	11.13703132	8.28E-29	7.50E-27	DDC
ENSG00000100557	49.69056126	4.667267735	0.550991782	8.470666684	2.44E-17	7.20E-16	CCDC198
ENSG00000185940	1.20265051	4.661773453	0.56400246	8.265519717	1.39E-16	3.77E-15	KRTAP5-5
ENSG00000158014	123.7658913	4.661071945	0.346119354	13.46666081	2.46E-41	5.41E-39	SLC30A2
ENSG00000166959	130.1449962	4.650532709	0.62741045	7.412265301	1.24E-13	2.36E-12	MS4A8
ENSG00000074276	193.5787809	4.646174622	0.238790159	19.4571445	2.54E-84	1.10E-80	CDHR2
ENSG00000187416	8.730514771	4.627489396	0.43298843	10.68732805	1.17E-26	8.73E-25	LHFPL3
ENSG00000169994	563.2115434	4.623481829	0.359637505	12.85595013	7.96E-38	1.42E-35	MYO7B
ENSG00000175267	107.9028362	4.602865717	0.368436249	12.49297736	8.15E-36	1.25E-33	VWA3A
ENSG00000123843	479.5870826	4.592095362	0.450219017	10.19969213	1.99E-24	1.22E-22	C4BPB
ENSG00000228262	50.61853638	4.586360322	0.579084267	7.920022322	2.37E-15	5.52E-14	LINC01317
ENSG00000259674	34.1589422	4.550899577	0.37887033	12.01176026	3.08E-33	3.95E-31	NA
ENSG00000264755	1.266922194	4.549718347	0.92650709	4.910613636	9.08E-07	6.08E-06	MIR3131
ENSG00000095932	170.1248681	4.531393656	0.297907394	15.21074584	3.00E-52	1.37E-49	SMIM24
ENSG00000248635	6.001530477	4.525610853	1.149744938	3.936186805	8.28E-05	0.000370511	NA
ENSG00000204121	26.38301897	4.521724281	0.52322318	8.642056495	5.52E-18	1.76E-16	NA
ENSG00000166589	806.6060387	4.516102904	0.435128532	10.37877909	3.10E-25	2.07E-23	CDH16
ENSG00000141744	97.60920015	4.512429762	0.341512725	13.21306478	7.38E-40	1.49E-37	PNMT
ENSG00000091138	10.46229887	4.505312309	0.348157175	12.94045516	2.66E-38	4.89E-36	SLC26A3
ENSG00000077327	135.1938627	4.49638165	0.416744635	10.78929703	3.87E-27	3.06E-25	SPAG6
ENSG00000162992	1.610521374	4.492012551	0.548219082	8.193827425	2.53E-16	6.65E-15	NEUROD1
ENSG00000153347	86.38301257	4.487438814	0.461277557	9.728283419	2.28E-22	1.16E-20	FAM81B
ENSG00000187546	33.01819314	4.439670158	0.526729604	8.42874622	3.49E-17	1.01E-15	AGMO
ENSG00000173627	5.058404492	4.439481057	0.477130056	9.30455124	1.35E-20	5.60E-19	APOBEC4
ENSG00000275688	2.241696827	4.438955149	0.518061636	8.568391947	1.05E-17	3.23E-16	NA
ENSG00000167800	18.12581234	4.430291995	0.299573561	14.78866154	1.73E-49	6.66E-47	TBX10
ENSG00000165309	182.3774544	4.425938642	0.488716523	9.056249246	1.35E-19	5.04E-18	ARMC3
ENSG00000271824	16.03535606	4.424835631	0.49226738	8.988683412	2.50E-19	9.04E-18	SMIM32
ENSG00000169562	471.0537459	4.420629927	0.464039961	9.526399222	1.63E-21	7.47E-20	GJB1
ENSG00000228648	2.279685621	4.417589886	0.66307024	6.662325675	2.70E-11	3.78E-10	NA
ENSG00000275896	72.28056728	4.414701227	0.555303171	7.950073863	1.86E-15	4.38E-14	PRSS2
ENSG00000188523	41.54597083	4.384675837	0.3642479	12.03761458	2.25E-33	2.94E-31	CFAP77
ENSG00000142484	60.60362288	4.373686612	0.637332357	6.862489512	6.77E-12	1.03E-10	TM4SF5
ENSG00000241388	75.90473086	4.372250493	0.474901416	9.206648671	3.36E-20	1.34E-18	HNF1A-AS1
ENSG00000231720	3.238684911	4.350738527	0.721701107	6.02844929	1.66E-09	1.77E-08	NA
ENSG00000176601	38.14339622	4.350712688	0.337719444	12.88262421	5.64E-38	1.02E-35	MAP3K19
ENSG00000006611	531.0255528	4.343745471	0.510328141	8.511671459	1.71E-17	5.14E-16	USH1C
ENSG00000243352	2.126722137	4.341813629	0.538258675	8.06640716	7.24E-16	1.80E-14	NA
ENSG00000173702	4489.448976	4.334706352	0.495734371	8.744010108	2.25E-18	7.45E-17	MUC13
ENSG00000140481	40.14840318	4.326574415	0.403237088	10.72960435	7.39E-27	5.67E-25	CCDC33
ENSG00000196260	573.1507937	4.318995691	0.442270811	9.765500202	1.58E-22	8.20E-21	SFTA2
ENSG00000229743	2.024862648	4.312463082	0.803916361	5.364318095	8.13E-08	6.57E-07	LINC01159
ENSG00000259120	85.26329025	4.308208564	0.312917182	13.76788754	3.98E-43	9.80E-41	SMIM6
ENSG00000247381	2.21222154	4.301232851	0.709429548	6.062945732	1.34E-09	1.46E-08	NA
ENSG00000131910	11.32593914	4.299251096	0.390181109	11.01860392	3.11E-28	2.70E-26	NR0B2
ENSG00000263429	78.39959356	4.284246679	0.44296971	9.671647016	3.98E-22	1.96E-20	TMEM238L
ENSG00000179902	92.09574856	4.281189005	0.391899623	10.92419781	8.83E-28	7.44E-26	C1orf194
ENSG00000219159	79.00958411	4.280196723	0.475697582	8.997726461	2.30E-19	8.35E-18	NA
ENSG00000254290	26.80168475	4.267178196	0.396651577	10.75800132	5.43E-27	4.23E-25	NA
ENSG00000181778	13.17716787	4.263140827	0.554000045	7.695199427	1.41E-14	2.96E-13	TMEM252
ENSG00000280309	2.880911857	4.260863756	0.379456667	11.22885464	2.94E-29	2.80E-27	NA
ENSG00000241186	57.79171987	4.248026203	0.459606315	9.242749852	2.40E-20	9.69E-19	TDGF1
ENSG00000244280	34.30473506	4.247046815	0.483159387	8.790156889	1.49E-18	5.04E-17	ECEL1P2
ENSG00000240241	9.55388956	4.246680938	0.754705852	5.626935216	1.83E-08	1.67E-07	NA
ENSG00000113924	570.5463331	4.24003537	0.401807265	10.55241092	4.95E-26	3.50E-24	HGD
ENSG00000277210	1.113268013	4.234226782	0.51386637	8.239937518	1.72E-16	4.64E-15	NA
ENSG00000099769	318.8937424	4.219568476	0.387534121	10.88825021	1.31E-27	1.08E-25	IGFALS
ENSG00000196620	20.9908347	4.216674448	0.428208101	9.847255203	7.04E-23	3.81E-21	UGT2B15
ENSG00000178602	1.782932753	4.212918658	0.647590011	6.505533728	7.74E-11	1.02E-09	OTOS
ENSG00000162460	5.48187949	4.202559267	0.416487126	10.09049021	6.09E-24	3.58E-22	TMEM82
ENSG00000253400	6.159064766	4.18704125	0.553546119	7.564033245	3.91E-14	7.83E-13	NA
ENSG00000157856	138.9444003	4.186274934	0.396188319	10.56637648	4.27E-26	3.03E-24	DRC1
ENSG00000163075	80.38525261	4.171290769	0.368829439	11.30953857	1.18E-29	1.15E-27	CFAP221
ENSG00000234423	20.88731425	4.166370429	0.486659054	8.561169053	1.12E-17	3.41E-16	LINC01250
ENSG00000249464	31.37679685	4.162144496	0.236230835	17.61897209	1.76E-69	2.47E-66	LINC01091
ENSG00000214797	24.25801668	4.152509583	0.418224131	9.928909577	3.12E-23	1.74E-21	NA
ENSG00000154269	184.2873293	4.150109322	0.354436028	11.70905043	1.15E-31	1.36E-29	ENPP3
ENSG00000113303	14.98999383	4.143497972	0.290580572	14.25937715	3.92E-46	1.26E-43	BTNL8
ENSG00000144852	21.616288	4.132859792	0.301298629	13.71682244	8.05E-43	1.96E-40	NR1I2
ENSG00000234224	7.458819385	4.126737327	0.728798052	5.662387976	1.49E-08	1.38E-07	TMEM229A
ENSG00000215182	5789.134889	4.124676986	0.573011059	7.198250223	6.10E-13	1.06E-11	MUC5AC
ENSG00000198203	155.3829698	4.1244582	0.308446299	13.37172211	8.85E-41	1.89E-38	SULT1C2
ENSG00000015520	60.92622835	4.123847891	0.275666326	14.95956346	1.35E-50	5.68E-48	NPC1L1
ENSG00000131771	3504.137012	4.117983807	0.44364015	9.282261325	1.66E-20	6.84E-19	PPP1R1B
ENSG00000171234	288.3885641	4.117339295	0.507390703	8.114731449	4.87E-16	1.24E-14	UGT2B7
ENSG00000177511	1.926882831	4.107461254	0.454636906	9.034597051	1.65E-19	6.07E-18	ST8SIA3
ENSG00000266583	0.689074473	4.107432739	1.174930096	3.495895418	0.000472474	0.001768696	MIR4478
ENSG00000160180	7990.293605	4.106745453	0.488748606	8.402572204	4.37E-17	1.25E-15	TFF3
ENSG00000257057	2.412135827	4.104349088	0.567915436	7.227042668	4.94E-13	8.70E-12	C11orf97
ENSG00000079689	2.889188996	4.103993885	0.634295405	6.470161779	9.79E-11	1.27E-09	SCGN
ENSG00000249231	2.852451559	4.103356182	0.508683756	8.066615331	7.23E-16	1.79E-14	CASC16
ENSG00000248771	92.48119291	4.080558902	0.529154388	7.711471344	1.24E-14	2.62E-13	SMIM31
ENSG00000226286	2.936364531	4.076262815	0.865101096	4.711891861	2.45E-06	1.51E-05	NA
ENSG00000159625	43.06210419	4.076050241	0.369112003	11.04285477	2.37E-28	2.08E-26	DRC7
ENSG00000007216	108.8152012	4.070216271	0.439900815	9.252577244	2.19E-20	8.93E-19	SLC13A2
ENSG00000261583	3.68423951	4.069704833	0.4569435	8.906363329	5.27E-19	1.86E-17	NA
ENSG00000214128	130.1114649	4.057546279	0.570726295	7.109443382	1.17E-12	1.96E-11	TMEM213
ENSG00000075891	108.7258204	4.045309255	0.582034398	6.950292406	3.65E-12	5.77E-11	PAX2
ENSG00000179813	13.56208211	4.044721986	0.591203199	6.841508962	7.84E-12	1.18E-10	FAM216B
ENSG00000112280	19.3372813	4.040318482	0.401469565	10.0638226	7.98E-24	4.63E-22	COL9A1
ENSG00000232306	12.71871706	4.033856497	0.377634636	10.68190286	1.24E-26	9.22E-25	NA
ENSG00000137473	7.328714412	4.023937907	0.491611684	8.185195833	2.72E-16	7.10E-15	TTC29
ENSG00000249746	2.807620906	4.021446939	0.383801796	10.47792632	1.09E-25	7.55E-24	NA
ENSG00000203697	931.3589919	4.013949478	0.352552569	11.38539281	4.94E-30	4.98E-28	CAPN8
ENSG00000226337	0.881809154	4.011508136	0.619155944	6.478994794	9.23E-11	1.20E-09	TMEM252-DT
ENSG00000225328	1.56545724	3.986915253	0.430067684	9.27043672	1.85E-20	7.61E-19	NA
ENSG00000249049	10.34152626	3.985381654	0.57676173	6.909927356	4.85E-12	7.52E-11	NA
ENSG00000163879	913.2127513	3.984827106	0.344020717	11.58310214	5.02E-31	5.67E-29	DNALI1
ENSG00000180525	92.41810563	3.983083528	0.317581122	12.54194048	4.40E-36	6.87E-34	DIP2C-AS1
ENSG00000152611	43.12340394	3.980294194	0.53375656	7.457134011	8.84E-14	1.71E-12	CAPSL
ENSG00000137860	248.7474545	3.973270467	0.441264427	9.004284551	2.17E-19	7.87E-18	SLC28A2
ENSG00000147606	60.6161166	3.963791612	0.321418036	12.33220032	6.08E-35	8.72E-33	SLC26A7
ENSG00000136352	37.6476748	3.955211748	0.587515438	6.732098409	1.67E-11	2.41E-10	NKX2-1
ENSG00000248608	1.453569782	3.954447983	0.457998322	8.634197539	5.91E-18	1.88E-16	LOC645433
ENSG00000198842	6.257672876	3.953574315	0.480262824	8.232105673	1.84E-16	4.93E-15	STYXL2
ENSG00000183463	0.711104691	3.931955017	0.901111538	4.363449861	1.28E-05	6.85E-05	URAD
ENSG00000103355	25.45003658	3.920134067	0.422903442	9.269572383	1.87E-20	7.66E-19	PRSS33
ENSG00000274002	6.287736489	3.91010253	0.400015252	9.774883621	1.44E-22	7.49E-21	NA
ENSG00000185303	42.6940983	3.901580359	0.450136011	8.66755883	4.41E-18	1.42E-16	SFTPA2
ENSG00000249599	37.53231524	3.88339259	0.558273482	6.956075679	3.50E-12	5.55E-11	BMPR1B-DT
ENSG00000188833	266.5918577	3.880691983	0.347314266	11.17343099	5.50E-29	5.07E-27	ENTPD8
ENSG00000136872	44.88344709	3.877918372	0.365689392	10.60440488	2.84E-26	2.04E-24	ALDOB
ENSG00000243518	1.608605331	3.872474714	0.439688772	8.807308621	1.28E-18	4.34E-17	NA
ENSG00000251526	1.430868463	3.868654218	0.454722437	8.507726698	1.77E-17	5.31E-16	NA
ENSG00000256340	22.3404579	3.86596828	0.383711181	10.07520362	7.11E-24	4.16E-22	ABCC6P1
ENSG00000198610	14.90960245	3.855310612	0.400247608	9.632313937	5.84E-22	2.82E-20	AKR1C4
ENSG00000214691	21.11932236	3.852196139	0.583682501	6.599814337	4.12E-11	5.64E-10	LINC01913
ENSG00000132744	385.4906523	3.850476125	0.243016953	15.84447537	1.53E-56	9.25E-54	ACY3
ENSG00000173467	778.8592495	3.843294716	0.517627234	7.424830968	1.13E-13	2.15E-12	AGR3
ENSG00000127324	2051.458085	3.839050616	0.4779464	8.032387352	9.56E-16	2.34E-14	TSPAN8
ENSG00000253428	1.160159575	3.83724412	0.4572954	8.391171476	4.81E-17	1.37E-15	LINC01942
ENSG00000267726	0.664403533	3.834711383	1.030318134	3.721871194	0.000197752	0.000808822	LINC02565
ENSG00000235510	1.227050548	3.834534553	0.767415403	4.996686979	5.83E-07	4.04E-06	NA
ENSG00000161798	4466.05888	3.82581564	0.420540643	9.097374313	9.25E-20	3.53E-18	AQP5
ENSG00000171714	76.0554512	3.818142655	0.275318392	13.86809878	9.89E-44	2.52E-41	ANO5
ENSG00000198788	686.1305749	3.816340608	0.386790219	9.866693667	5.80E-23	3.17E-21	MUC2
ENSG00000080293	25.06781051	3.808981221	0.309188786	12.31927353	7.13E-35	1.01E-32	SCTR
ENSG00000120440	5.807113146	3.805512056	0.421963728	9.018576252	1.91E-19	6.94E-18	TTLL2
ENSG00000168631	269.1646165	3.804751686	0.487739751	7.800782435	6.15E-15	1.35E-13	MUCL3
ENSG00000224265	0.77021636	3.80241093	0.690669627	5.505397636	3.68E-08	3.17E-07	NA
ENSG00000187908	1890.162386	3.799241064	0.485171802	7.830712855	4.85E-15	1.08E-13	DMBT1
ENSG00000279737	0.644568103	3.785693634	0.871198452	4.345386088	1.39E-05	7.38E-05	NA
ENSG00000169297	16.51548489	3.785193381	0.47191202	8.020972595	1.05E-15	2.56E-14	NR0B1
ENSG00000167580	27.4723259	3.76607598	0.469813437	8.016109557	1.09E-15	2.65E-14	AQP2
ENSG00000260057	1.858681005	3.764320161	0.850829725	4.424293195	9.68E-06	5.31E-05	NA
ENSG00000169894	839.4730529	3.758009037	0.397069795	9.464353839	2.95E-21	1.31E-19	MUC3A
ENSG00000255774	8.270722585	3.753813453	0.510452455	7.35389441	1.93E-13	3.56E-12	LINC02747
ENSG00000169064	66.56135668	3.749791814	0.567467282	6.607943639	3.90E-11	5.36E-10	ZBBX
ENSG00000122735	35.60728562	3.745278333	0.371959399	10.06905147	7.57E-24	4.41E-22	DNAI1
ENSG00000160182	610.6372247	3.73937074	0.531547694	7.034873416	1.99E-12	3.26E-11	TFF1
ENSG00000226780	4.526340861	3.736953535	0.470260128	7.946566824	1.92E-15	4.50E-14	NA
ENSG00000259342	97.14390206	3.732718253	0.348416212	10.71338855	8.81E-27	6.68E-25	NA
ENSG00000132911	25.42696914	3.729614823	0.387436811	9.626382211	6.19E-22	2.97E-20	NMUR2
ENSG00000254261	2.594463321	3.727301591	0.579505617	6.431864477	1.26E-10	1.61E-09	NA
ENSG00000178965	84.62258519	3.726840776	0.493444091	7.552711335	4.26E-14	8.50E-13	ERICH3
ENSG00000243083	2.984258484	3.723106821	0.394403793	9.439835234	3.73E-21	1.64E-19	LINC00870
ENSG00000158816	16.11369817	3.719911471	0.449244976	8.280362981	1.23E-16	3.36E-15	VWA5B1
ENSG00000124237	49.37618011	3.715535562	0.803299491	4.625342859	3.74E-06	2.23E-05	C20orf85
ENSG00000267968	0.994763835	3.706742563	0.655746295	5.652708357	1.58E-08	1.45E-07	LOC105372441
ENSG00000184471	1.000411462	3.706588568	0.473362579	7.830337103	4.87E-15	1.08E-13	C1QTNF8
ENSG00000136883	694.2832194	3.705526416	0.334192433	11.08800214	1.43E-28	1.28E-26	KIF12
ENSG00000158428	40.33756653	3.705191382	0.275351724	13.45621274	2.83E-41	6.16E-39	CATIP
ENSG00000251664	18.75528049	3.700732341	0.533660535	6.934618724	4.07E-12	6.41E-11	PCDHA12
ENSG00000229921	8.398719139	3.69877318	0.488232274	7.575847356	3.57E-14	7.18E-13	KIF25-AS1
ENSG00000233451	0.659059002	3.694917756	0.610686679	6.05043123	1.44E-09	1.57E-08	NA
ENSG00000144820	65.03104209	3.692371847	0.532331996	6.936220016	4.03E-12	6.34E-11	ADGRG7
ENSG00000261161	1.881437932	3.689672199	0.687584314	5.366137832	8.04E-08	6.51E-07	NA
ENSG00000128242	110.7880013	3.689011895	0.368136365	10.02077557	1.24E-23	7.13E-22	GAL3ST1
ENSG00000237087	7.450925614	3.68900081	0.506744498	7.279804362	3.34E-13	6.02E-12	NA
ENSG00000117983	12421.03074	3.685264835	0.527773362	6.982665477	2.90E-12	4.65E-11	MUC5B
ENSG00000162763	2.193361531	3.684939439	0.69662084	5.289734712	1.22E-07	9.59E-07	LRRC52
ENSG00000095110	1.490268247	3.678210839	0.441651425	8.328311955	8.20E-17	2.28E-15	NXPE1
ENSG00000166825	4124.471322	3.677651172	0.269978275	13.62202631	2.96E-42	6.95E-40	ANPEP
ENSG00000234647	3.29699987	3.671327462	0.421400521	8.712204379	2.98E-18	9.77E-17	LOC101929420
ENSG00000188761	558.7967325	3.669678248	0.309367111	11.86188873	1.87E-32	2.27E-30	BCL2L15
ENSG00000112539	34.3833135	3.668503795	0.550387175	6.665314821	2.64E-11	3.71E-10	C6orf118
ENSG00000254573	0.711519039	3.664446082	0.792394899	4.624520028	3.75E-06	2.23E-05	NA
ENSG00000257512	21.43528189	3.661757968	0.460999176	7.94309005	1.97E-15	4.63E-14	NA
ENSG00000157423	41.18131945	3.657529188	0.376380044	9.717649083	2.54E-22	1.28E-20	HYDIN
ENSG00000170703	43.8446437	3.647294996	0.404794348	9.010241908	2.06E-19	7.46E-18	TTLL6
ENSG00000230062	4.304902542	3.62846235	0.499658983	7.261877546	3.82E-13	6.82E-12	ANKRD66
ENSG00000171811	79.77527367	3.625945313	0.382662347	9.475573805	2.65E-21	1.19E-19	CFAP46
ENSG00000170608	426.8210608	3.623454131	0.3571294	10.14605388	3.45E-24	2.08E-22	FOXA3
ENSG00000112818	22.91090067	3.610865696	0.315472475	11.44589776	2.47E-30	2.58E-28	MEP1A
ENSG00000139874	91.8275616	3.604724379	0.420225369	8.578074168	9.65E-18	2.98E-16	SSTR1
ENSG00000181378	19.10427567	3.604103115	0.380279082	9.477521348	2.60E-21	1.17E-19	CFAP65
ENSG00000244503	4.933082769	3.594335173	0.253208146	14.19517983	9.81E-46	3.05E-43	LOC100421817
ENSG00000007062	1943.146903	3.573261881	0.466239284	7.664008591	1.80E-14	3.74E-13	PROM1
ENSG00000232400	2.654086829	3.569924553	0.459526918	7.768695178	7.93E-15	1.72E-13	RAD17P1
ENSG00000148735	1616.483747	3.56905172	0.405482928	8.801977775	1.34E-18	4.55E-17	PLEKHS1
ENSG00000164972	137.6690994	3.568061658	0.300554911	11.87157995	1.66E-32	2.03E-30	C9orf24
ENSG00000118094	29.66292411	3.566320739	0.343367553	10.38630676	2.86E-25	1.92E-23	TREH
ENSG00000213822	0.516672934	3.56431019	0.92922074	3.835805677	0.000125153	0.00053634	CEACAM18
ENSG00000232415	20.28132671	3.560570447	0.268764471	13.24792088	4.64E-40	9.52E-38	NA
ENSG00000261411	2.623109348	3.558881536	0.61958201	5.744003987	9.25E-09	8.88E-08	NA
ENSG00000276740	1.606778202	3.557369643	0.469482474	7.577215001	3.53E-14	7.11E-13	NA
ENSG00000258812	1.312547893	3.552250211	0.588947261	6.031525137	1.62E-09	1.74E-08	TRAV33
ENSG00000170099	26.88371361	3.552084885	0.456568261	7.779964543	7.25E-15	1.58E-13	SERPINA6
ENSG00000225315	1.742396721	3.546527301	0.409036006	8.670452604	4.30E-18	1.39E-16	NA
ENSG00000274019	0.994699762	3.544355293	0.397563343	8.915196417	4.87E-19	1.73E-17	NA
ENSG00000185985	21.47395291	3.530038413	0.385239117	9.163239799	5.04E-20	1.97E-18	SLITRK2
ENSG00000274993	10.38741701	3.529905145	0.327675165	10.77257457	4.64E-27	3.66E-25	LOC105375431
ENSG00000157765	3825.149917	3.52882949	0.44526563	7.92522317	2.28E-15	5.31E-14	SLC34A2
ENSG00000204385	4735.682353	3.528737428	0.310332205	11.37083863	5.84E-30	5.82E-28	SLC44A4
ENSG00000101746	9.219815556	3.527450554	0.43736581	8.065217879	7.31E-16	1.81E-14	NOL4
ENSG00000278912	19.84527317	3.52680148	0.469401892	7.513394262	5.76E-14	1.13E-12	NA
ENSG00000179073	4.016709562	3.525150298	0.606415178	5.813097078	6.13E-09	6.04E-08	TAAR3P
ENSG00000124568	1.085339613	3.522774987	0.684531064	5.146260223	2.66E-07	1.95E-06	SLC17A1
ENSG00000250942	6.033281147	3.519216523	0.412662278	8.528079042	1.49E-17	4.48E-16	ENPP7P11
ENSG00000212479	0.750363757	3.513198644	0.562343677	6.24742268	4.17E-10	4.94E-09	NA
ENSG00000177468	1.795213995	3.506082877	0.938603141	3.73542632	0.000187397	0.00077025	OLIG3
ENSG00000224093	52.67449732	3.504696969	0.272388022	12.86656051	6.94E-38	1.25E-35	NA
ENSG00000204711	7.758540831	3.502711429	0.636833443	5.500200194	3.79E-08	3.26E-07	C9orf135
ENSG00000163885	60.53933458	3.497641856	0.324962146	10.76322858	5.13E-27	4.02E-25	CFAP100
ENSG00000245750	28.73715101	3.497427001	0.312506017	11.19155093	4.49E-29	4.17E-27	DRAIC
ENSG00000162383	49.42523306	3.492530598	0.304073251	11.48581989	1.55E-30	1.66E-28	SLC1A7
ENSG00000248211	1.304078884	3.491685868	0.495910481	7.04096001	1.91E-12	3.12E-11	NA
ENSG00000114805	335.8012204	3.488776435	0.326125918	10.69763623	1.04E-26	7.82E-25	PLCH1
ENSG00000248763	3.587781858	3.488365954	0.639092835	5.458308655	4.81E-08	4.06E-07	NA
ENSG00000260403	0.756648811	3.487246216	0.676838209	5.152259685	2.57E-07	1.90E-06	NA
ENSG00000139515	82.30695419	3.479510133	0.64626557	5.384025228	7.28E-08	5.95E-07	PDX1
ENSG00000101441	6.512274379	3.478892361	0.532211536	6.536672224	6.29E-11	8.39E-10	CST4
ENSG00000158901	1.977650702	3.476500264	0.471910399	7.36686513	1.75E-13	3.25E-12	WFDC8
ENSG00000279142	0.881558585	3.471013993	0.570904039	6.079855382	1.20E-09	1.32E-08	NA
ENSG00000259508	1.578849285	3.469080277	0.535179912	6.482082382	9.05E-11	1.18E-09	NA
ENSG00000106331	0.507842611	3.467281282	1.08674995	3.190505123	0.001420243	0.004689029	PAX4
ENSG00000204616	1178.894262	3.466992203	0.331773977	10.44986178	1.47E-25	1.00E-23	TRIM31
ENSG00000081479	75.37536011	3.466859667	0.382718411	9.058512908	1.32E-19	4.95E-18	LRP2
ENSG00000248399	2.899132927	3.464930124	0.454812969	7.618362624	2.57E-14	5.25E-13	NA
ENSG00000185737	5.455638555	3.464919028	0.466409611	7.428918592	1.09E-13	2.09E-12	NRG3
ENSG00000279343	0.6702796	3.463112747	0.865784344	3.999971551	6.34E-05	0.000292201	NA
ENSG00000119913	0.518415909	3.460131264	0.766026316	4.516987463	6.27E-06	3.58E-05	TECTB
ENSG00000092850	210.134092	3.458470323	0.319342109	10.82998523	2.48E-27	2.00E-25	TEKT2
ENSG00000110975	11.60284254	3.455840289	0.508155674	6.800751165	1.04E-11	1.54E-10	SYT10
ENSG00000233919	0.745609452	3.454994652	0.505914654	6.829204535	8.54E-12	1.28E-10	NA
ENSG00000231748	1.761311742	3.454473089	0.572649751	6.032436198	1.62E-09	1.73E-08	NA
ENSG00000255847	11.05550531	3.451534243	0.400853014	8.610473469	7.28E-18	2.29E-16	NA
ENSG00000215217	159.9042566	3.442704134	0.435191849	7.910773473	2.56E-15	5.91E-14	C5orf49
ENSG00000163501	188.7929592	3.442192756	0.51674296	6.661324913	2.71E-11	3.80E-10	IHH
ENSG00000135773	66.79259812	3.436537656	0.353328648	9.726178938	2.33E-22	1.18E-20	CAPN9
ENSG00000236699	192.8057174	3.42186271	0.282112724	12.12941642	7.38E-34	9.97E-32	ARHGEF38
ENSG00000096006	876.7368377	3.421798652	0.535424924	6.390809429	1.65E-10	2.07E-09	CRISP3
ENSG00000118492	5.166636958	3.420575073	0.475324004	7.196301986	6.19E-13	1.08E-11	ADGB
ENSG00000178568	154.2146303	3.417524565	0.398689423	8.571896738	1.02E-17	3.14E-16	ERBB4
ENSG00000256064	1.200355724	3.417498164	0.551391737	6.197949545	5.72E-10	6.66E-09	NA
ENSG00000106384	4.815520874	3.415354178	0.378948747	9.012707394	2.01E-19	7.31E-18	MOGAT3
ENSG00000142025	3.858645603	3.413595738	0.610439557	5.592029054	2.24E-08	2.02E-07	DMRTC2
ENSG00000181291	36.58883409	3.409433391	0.254919234	13.37456312	8.52E-41	1.83E-38	TMEM132E
ENSG00000241598	1.420117848	3.4062548	0.463539229	7.348363599	2.01E-13	3.70E-12	KRTAP5-4
ENSG00000134595	1.38619312	3.403524872	0.706831161	4.815187926	1.47E-06	9.48E-06	SOX3
ENSG00000248383	38.9533305	3.398529846	0.479575944	7.086531104	1.38E-12	2.29E-11	PCDHAC1
ENSG00000101049	135.9896138	3.396124887	0.275669086	12.31957104	7.11E-35	1.01E-32	SGK2
ENSG00000157399	240.4258718	3.395354185	0.358144939	9.480391354	2.53E-21	1.14E-19	ARSL
ENSG00000167858	59.78066896	3.394403071	0.346180347	9.805302636	1.07E-22	5.67E-21	TEKT1
ENSG00000249510	0.520273033	3.383382021	0.657918776	5.142552762	2.71E-07	1.99E-06	NA
ENSG00000217447	0.61570511	3.378229245	0.613704316	5.504652902	3.70E-08	3.18E-07	NA
ENSG00000166143	97.15871064	3.372827481	0.361542985	9.328980571	1.07E-20	4.48E-19	PPP1R14D
ENSG00000237463	1.978069936	3.372139981	0.682372701	4.941786173	7.74E-07	5.24E-06	LRRC52-AS1
ENSG00000237013	6.239724487	3.366605294	0.488642607	6.889708851	5.59E-12	8.58E-11	LINC01812
ENSG00000002726	1550.964991	3.363422304	0.369857991	9.093820833	9.56E-20	3.64E-18	AOC1
ENSG00000197635	573.4404417	3.363248525	0.265942485	12.64652589	1.17E-36	1.89E-34	DPP4
ENSG00000150873	67.96085007	3.360516168	0.314772307	10.67602231	1.32E-26	9.78E-25	C2orf50
ENSG00000203972	5.138978716	3.359454363	0.764084637	4.396704501	1.10E-05	5.96E-05	GLYATL3
ENSG00000225298	1.154513838	3.356246868	0.543836849	6.171422316	6.77E-10	7.75E-09	LINC00113
ENSG00000278908	0.94249633	3.348563175	0.497761553	6.727243501	1.73E-11	2.48E-10	NA
ENSG00000113763	123.492248	3.339566366	0.342127898	9.761163538	1.65E-22	8.53E-21	UNC5A
ENSG00000259702	0.954002332	3.33495636	0.420617948	7.928706752	2.21E-15	5.16E-14	NA
ENSG00000156687	10.27996313	3.33276232	0.425860947	7.825940237	5.04E-15	1.12E-13	UNC5D
ENSG00000006128	8.561660562	3.33023491	0.457878945	7.273177653	3.51E-13	6.31E-12	TAC1
ENSG00000224060	2.771004868	3.32836865	0.661449685	5.031930209	4.86E-07	3.42E-06	NA
ENSG00000231769	16.63740488	3.323190622	0.34848649	9.536067297	1.48E-21	6.83E-20	NA
ENSG00000197705	189.4590961	3.322432044	0.450579344	7.373689202	1.66E-13	3.10E-12	KLHL14
ENSG00000178796	11.36303928	3.321847752	0.373684593	8.88944262	6.14E-19	2.16E-17	RIIAD1
ENSG00000133169	31.60963695	3.317386137	0.41950805	7.90780091	2.62E-15	6.05E-14	BEX1
ENSG00000157330	6.57210358	3.311334604	0.551971565	5.999103599	1.98E-09	2.10E-08	C1orf158
ENSG00000164746	94.83562218	3.310151661	0.325617383	10.16577074	2.82E-24	1.71E-22	C7orf57
ENSG00000262294	10.24321669	3.298600325	0.372320846	8.859563902	8.03E-19	2.79E-17	NA
ENSG00000132026	125.6881724	3.296997562	0.348544138	9.459340165	3.10E-21	1.37E-19	RTBDN
ENSG00000250522	1.031245006	3.294374258	0.401645416	8.202195594	2.36E-16	6.25E-15	NA
ENSG00000168955	4.341119167	3.293997496	0.383032186	8.59979297	7.99E-18	2.50E-16	TM4SF20
ENSG00000001626	502.4413577	3.290262053	0.440175913	7.474879829	7.73E-14	1.49E-12	CFTR
ENSG00000111834	67.910438	3.288848021	0.24626643	13.35483694	1.11E-40	2.36E-38	RSPH4A
ENSG00000125999	6840.024362	3.286431199	0.597078458	5.504186516	3.71E-08	3.19E-07	BPIFB1
ENSG00000155792	1249.205202	3.282937953	0.228056047	14.39531202	5.54E-47	1.87E-44	DEPTOR
ENSG00000177984	3.879133738	3.282119627	0.510640594	6.427455362	1.30E-10	1.65E-09	LCN15
ENSG00000149295	53.54563728	3.28135524	0.381430367	8.602763501	7.78E-18	2.44E-16	DRD2
ENSG00000146521	22.60133835	3.280486487	0.316236132	10.37353469	3.27E-25	2.16E-23	LINC01558
ENSG00000197893	6.457420093	3.273559058	0.462210146	7.082404156	1.42E-12	2.36E-11	NRAP
ENSG00000096088	10.11729231	3.273003818	0.460356464	7.109716215	1.16E-12	1.96E-11	PGC
ENSG00000164749	214.683407	3.272238262	0.309764251	10.56364076	4.39E-26	3.11E-24	HNF4G
ENSG00000199899	10.78926812	3.270882321	0.305126089	10.71977271	8.22E-27	6.28E-25	NA
ENSG00000198049	5.072720988	3.270657233	0.366273109	8.929558704	4.28E-19	1.52E-17	AVPR1B
ENSG00000275944	0.602441327	3.268943565	0.510437242	6.404202697	1.51E-10	1.91E-09	NA
ENSG00000134398	1765.153791	3.267845646	0.393091792	8.313187172	9.32E-17	2.58E-15	ERN2
ENSG00000233293	1.345467557	3.264188453	0.572502298	5.701616333	1.19E-08	1.11E-07	NA
ENSG00000230535	10.4687872	3.262427051	0.653707469	4.990652859	6.02E-07	4.16E-06	NA
ENSG00000262558	5.751848645	3.259805398	0.386614627	8.431665974	3.41E-17	9.91E-16	NA
ENSG00000253563	5.019676631	3.256829347	0.683268304	4.766545334	1.87E-06	1.18E-05	NKX2-1-AS1
ENSG00000170439	234.1475007	3.252531252	0.286094354	11.36873626	5.98E-30	5.94E-28	METTL7B
ENSG00000240250	0.665362029	3.251417229	0.577415329	5.630985304	1.79E-08	1.64E-07	RN7SL541P
ENSG00000103534	2544.952874	3.251155164	0.301140035	10.79615722	3.59E-27	2.85E-25	TMC5
ENSG00000105479	350.5040593	3.242882332	0.27941266	11.60606802	3.84E-31	4.36E-29	CCDC114
ENSG00000112981	46.89209584	3.242203861	0.346379557	9.360263328	7.95E-21	3.39E-19	NME5
ENSG00000174844	26.80809772	3.240758353	0.245722735	13.1886793	1.02E-39	2.04E-37	DNAH12
ENSG00000173557	72.36316084	3.24067314	0.394383639	8.217057764	2.09E-16	5.56E-15	FAM166C
ENSG00000226172	0.978506684	3.23906098	0.536401149	6.038504925	1.56E-09	1.67E-08	LOC105378933
ENSG00000146038	244.2311397	3.238651389	0.397863017	8.140116695	3.95E-16	1.01E-14	DCDC2
ENSG00000255394	1.751516533	3.235547439	0.639304492	5.061042866	4.17E-07	2.97E-06	C8orf49
ENSG00000228037	39.76171394	3.227088448	0.264185079	12.2152563	2.58E-34	3.56E-32	LOC100996583
ENSG00000125207	81.19563923	3.226683171	0.506514225	6.370370288	1.89E-10	2.34E-09	PIWIL1
ENSG00000080493	350.209725	3.226310884	0.356060416	9.06113328	1.29E-19	4.84E-18	SLC4A4
ENSG00000187699	818.1780838	3.225880223	0.302620727	10.65981254	1.57E-26	1.16E-24	C2orf88
ENSG00000260015	8.906419732	3.225322048	0.48926933	6.592119821	4.34E-11	5.92E-10	NA
ENSG00000204099	95.21315449	3.22506949	0.319068506	10.10776505	5.10E-24	3.03E-22	NEU4
ENSG00000259925	20.843311	3.220217739	0.367249776	8.768467535	1.81E-18	6.05E-17	NA
ENSG00000254550	2.707309394	3.218383018	0.290528025	11.07770246	1.61E-28	1.42E-26	OMP
ENSG00000262117	29.80440004	3.216152467	0.697405517	4.611595963	4.00E-06	2.37E-05	BCAR4
ENSG00000254343	122.1861259	3.215676394	0.245242408	13.11223624	2.80E-39	5.52E-37	NA
ENSG00000130643	10.23089725	3.215578448	0.33829325	9.505298873	1.99E-21	9.07E-20	CALY
ENSG00000261650	1.194684373	3.21094317	1.035970492	3.099454274	0.001938775	0.006171163	NA
ENSG00000232721	4.177191778	3.209489976	0.391765501	8.192375204	2.56E-16	6.73E-15	NA
ENSG00000175329	1.030128765	3.204938021	0.713573096	4.491394139	7.08E-06	3.99E-05	ISX
ENSG00000263508	2.573106352	3.204316062	0.383232838	8.361277377	6.20E-17	1.75E-15	NA
ENSG00000224090	5.939465475	3.200694939	0.479983522	6.668343379	2.59E-11	3.64E-10	LOC100129175
ENSG00000280623	17.08163223	3.193701818	0.597572401	5.344460037	9.07E-08	7.27E-07	NA
ENSG00000101198	237.2907839	3.192780062	0.398282771	8.016364984	1.09E-15	2.64E-14	NKAIN4
ENSG00000134873	625.1735688	3.191982442	0.424064717	7.52711158	5.19E-14	1.03E-12	CLDN10
ENSG00000123977	32.31603641	3.189773783	0.455823128	6.997832241	2.60E-12	4.20E-11	DAW1
ENSG00000243316	0.892770079	3.187295452	0.424685036	7.505080659	6.14E-14	1.20E-12	GUCY2GP
ENSG00000227745	0.576925126	3.186595437	0.680833149	4.680435201	2.86E-06	1.74E-05	NA
ENSG00000271916	2.90076342	3.186477111	0.331020347	9.62622733	6.20E-22	2.98E-20	NA
ENSG00000255277	13.30903696	3.18357665	0.315357103	10.09514806	5.80E-24	3.44E-22	ABCC6P2
ENSG00000214039	34.91988038	3.183334351	0.640825121	4.967555496	6.78E-07	4.64E-06	LINC02418
ENSG00000279427	13.62126723	3.182694105	0.648402288	4.908517694	9.18E-07	6.14E-06	NA
ENSG00000261399	7.689885929	3.181645312	0.565988028	5.621400374	1.89E-08	1.72E-07	NA
ENSG00000243910	38.56100136	3.181139037	0.309999629	10.26175111	1.05E-24	6.60E-23	TUBA4B
ENSG00000203645	4.912718469	3.18044366	0.304928754	10.43012052	1.81E-25	1.22E-23	LINC00501
ENSG00000173947	239.4192983	3.180204204	0.351758091	9.040884312	1.55E-19	5.76E-18	PIFO
ENSG00000240694	171.5801079	3.177417357	0.339731154	9.352740601	8.54E-21	3.62E-19	PNMA2
ENSG00000165269	116.1574377	3.176806912	0.35204321	9.023911907	1.81E-19	6.66E-18	AQP7
ENSG00000162543	444.0884588	3.175379598	0.345844314	9.181528999	4.25E-20	1.68E-18	UBXN10
ENSG00000151838	1.51742162	3.175196493	0.564392696	5.625863894	1.85E-08	1.68E-07	CCDC175
ENSG00000204128	184.6161464	3.174625273	0.329246343	9.642097282	5.31E-22	2.57E-20	C2orf72
ENSG00000262619	10.97063705	3.173777612	0.461243654	6.880913345	5.95E-12	9.10E-11	NA
ENSG00000222001	19.59817415	3.173033716	1.052675485	3.014256304	0.002576101	0.007913088	LOC101928881
ENSG00000185681	27.39974361	3.171180216	0.458054187	6.923155177	4.42E-12	6.90E-11	MORN5
ENSG00000136918	46.26565551	3.165177989	0.295423858	10.71402292	8.75E-27	6.64E-25	WDR38
ENSG00000206069	41.44828812	3.16375856	0.446186596	7.090662492	1.33E-12	2.23E-11	TMEM211
ENSG00000254647	2.320007319	3.161827768	0.966697876	3.270750714	0.001072624	0.003660712	INS
ENSG00000136574	60.5071529	3.161392	0.584134206	5.412098738	6.23E-08	5.15E-07	GATA4
ENSG00000165702	17.01924388	3.156574814	0.312042812	10.1158389	4.70E-24	2.80E-22	GFI1B
ENSG00000128918	924.8908505	3.153596535	0.316722128	9.956982035	2.35E-23	1.32E-21	ALDH1A2
ENSG00000165215	3684.071255	3.152374322	0.38257768	8.239828106	1.72E-16	4.64E-15	CLDN3
ENSG00000125618	2307.113119	3.148185869	0.330125197	9.536339226	1.48E-21	6.82E-20	PAX8
ENSG00000237002	0.418658612	3.14560258	0.929677551	3.383541506	0.000715574	0.002558475	NA
ENSG00000153446	128.8914802	3.144625912	0.403623406	7.790989988	6.65E-15	1.46E-13	C16orf89
ENSG00000134548	18.2345631	3.139715292	0.409973697	7.658333485	1.88E-14	3.89E-13	SPX
ENSG00000279905	3.25072653	3.139693691	0.299852917	10.47077921	1.18E-25	8.09E-24	NA
ENSG00000237179	2.141413853	3.139552297	0.472475932	6.644893597	3.03E-11	4.23E-10	LINC01797
ENSG00000162482	307.8879529	3.138809721	0.220358349	14.24411528	4.88E-46	1.54E-43	AKR7A3
ENSG00000244107	0.437843231	3.137364871	0.982805251	3.192254891	0.001411667	0.004664644	RN7SL250P
ENSG00000154479	43.98167903	3.135884974	0.23668376	13.24926126	4.56E-40	9.40E-38	CCDC173
ENSG00000071677	0.553065378	3.135739922	0.640209948	4.897986878	9.68E-07	6.45E-06	PRLH
ENSG00000244753	1.008581109	3.135706107	0.334357755	9.378296336	6.70E-21	2.88E-19	NA
ENSG00000183833	240.0098942	3.132761703	0.353034579	8.873809782	7.07E-19	2.47E-17	CFAP91
ENSG00000180440	53.88191105	3.132720633	0.626863554	4.997452176	5.81E-07	4.03E-06	SERTM1
ENSG00000198944	170.5777933	3.132434294	0.250508107	12.50432304	7.07E-36	1.09E-33	SOWAHA
ENSG00000119547	525.7447375	3.130946103	0.308128261	10.16117798	2.95E-24	1.79E-22	ONECUT2
ENSG00000101443	24525.72329	3.12837824	0.33493724	9.340192339	9.62E-21	4.05E-19	WFDC2
ENSG00000260220	106.8079119	3.125503616	0.372161069	8.398255165	4.53E-17	1.30E-15	CCDC187
ENSG00000009950	232.6607897	3.117242479	0.327033808	9.531866122	1.54E-21	7.10E-20	MLXIPL
ENSG00000234020	0.927630828	3.108739537	0.48904872	6.356707232	2.06E-10	2.54E-09	NA
ENSG00000254799	5.311289095	3.107575974	0.509787198	6.095829757	1.09E-09	1.21E-08	NA
ENSG00000254399	1.45965044	3.103088368	0.599029045	5.180196845	2.22E-07	1.65E-06	NA
ENSG00000039537	14.76253441	3.094436152	0.539703311	5.733587486	9.83E-09	9.40E-08	C6
ENSG00000115423	97.32768938	3.092705329	0.276592204	11.1814624	5.03E-29	4.66E-27	DNAH6
ENSG00000187889	56.77965085	3.092399553	0.390374794	7.921616862	2.34E-15	5.45E-14	FYB2
ENSG00000260173	1.050989809	3.089287251	0.310234002	9.957926065	2.33E-23	1.31E-21	NA
ENSG00000134438	34.8516719	3.088585357	0.526086268	5.870872406	4.34E-09	4.38E-08	RAX
ENSG00000133115	13.37265511	3.08746748	0.475997472	6.48631066	8.80E-11	1.15E-09	STOML3
ENSG00000253361	5.173303682	3.087311446	0.708095451	4.360021575	1.30E-05	6.95E-05	NA
ENSG00000251248	0.455433347	3.081294698	0.854588943	3.605586901	0.000311448	0.001213552	NA
ENSG00000231421	1.718207108	3.08050818	0.756316029	4.073043626	4.64E-05	0.000220281	NA
ENSG00000257588	224.5259582	3.08044937	0.454900308	6.771702103	1.27E-11	1.86E-10	LOC101927318
ENSG00000188306	29.22775585	3.077572743	0.393850653	7.814060269	5.54E-15	1.22E-13	LRRIQ4
ENSG00000179873	15.62669424	3.076102747	0.480507886	6.401773693	1.54E-10	1.93E-09	NLRP11
ENSG00000239389	4.483786581	3.075141592	0.547822484	5.613390623	1.98E-08	1.80E-07	PCDHA13
ENSG00000224968	1.448543588	3.07502621	0.361147538	8.514598287	1.67E-17	5.02E-16	LINC01645
ENSG00000244137	3.11097161	3.070124745	0.346788108	8.853027748	8.52E-19	2.95E-17	NA
ENSG00000259937	2.856223414	3.062687661	0.622246768	4.921982434	8.57E-07	5.76E-06	NA
ENSG00000078898	14.56520884	3.061111888	0.729790077	4.194510155	2.73E-05	0.000136428	BPIFB2
ENSG00000237223	1.807205413	3.060903445	0.383321292	7.985216333	1.40E-15	3.35E-14	SULT1C2P1
ENSG00000233730	2.938141291	3.060219188	0.406126829	7.535131805	4.88E-14	9.70E-13	NA
ENSG00000242640	4.554995465	3.058898021	0.43107173	7.096030214	1.28E-12	2.15E-11	NA
ENSG00000227947	0.396668123	3.05847113	0.794766839	3.848262134	0.000118959	0.000512415	LINC01738
ENSG00000260903	10.79044912	3.055717713	0.375949599	8.127998336	4.36E-16	1.11E-14	XKR7
ENSG00000232192	1.594775872	3.055534672	0.447108411	6.833990586	8.26E-12	1.24E-10	KIF26B-AS1
ENSG00000223392	6.706468508	3.054523009	0.567741584	5.380129087	7.44E-08	6.06E-07	CLDN10-AS1
ENSG00000277311	5.86784702	3.049751637	0.533189935	5.719822217	1.07E-08	1.01E-07	NA
ENSG00000124920	1868.871117	3.048006903	0.247808782	12.29983408	9.08E-35	1.28E-32	MYRF
ENSG00000276289	4.388834571	3.047653432	0.38458417	7.924542066	2.29E-15	5.33E-14	KCNE1B
ENSG00000164736	633.1038565	3.046564974	0.361953328	8.417010534	3.86E-17	1.12E-15	SOX17
ENSG00000256802	84.95935423	3.04518687	0.347268543	8.768968372	1.80E-18	6.03E-17	LOC100130111
ENSG00000227312	0.545066572	3.045088421	0.398018782	7.650614886	2.00E-14	4.12E-13	RPL26P8
ENSG00000080572	6.673985726	3.044932638	0.390988711	7.787776347	6.82E-15	1.49E-13	DNAAF6
ENSG00000260592	9.335957023	3.042759672	0.290370278	10.47889507	1.08E-25	7.49E-24	NA
ENSG00000204511	0.653681752	3.041189006	0.552829273	5.501135985	3.77E-08	3.24E-07	MCCD1
ENSG00000229155	8.180697414	3.040730018	0.363595583	8.362945437	6.12E-17	1.72E-15	NA
ENSG00000275392	1.474140938	3.038613634	0.36084833	8.420750161	3.74E-17	1.08E-15	NA
ENSG00000201496	0.411204425	3.038230778	0.958568715	3.169549277	0.001526756	0.004995647	RN7SKP275
ENSG00000086159	77.95183939	3.037871136	0.317555731	9.566418855	1.11E-21	5.19E-20	AQP6
ENSG00000164266	592.8396038	3.033502204	0.535640757	5.663314754	1.48E-08	1.37E-07	SPINK1
ENSG00000165828	81.58238139	3.033357101	0.36026043	8.419900843	3.77E-17	1.09E-15	PRAP1
ENSG00000235994	1.84569094	3.027036753	0.593952889	5.096425674	3.46E-07	2.50E-06	HGC6.3
ENSG00000256870	145.1415902	3.025303152	0.679688599	4.451013534	8.55E-06	4.73E-05	SLC5A8
ENSG00000280439	4.556847249	3.022753859	0.352880703	8.565936975	1.07E-17	3.29E-16	NA
ENSG00000168309	621.8561399	3.018494384	0.329880106	9.150277125	5.68E-20	2.21E-18	FAM107A
ENSG00000204613	51.5989861	3.018048175	0.353108971	8.547073062	1.26E-17	3.83E-16	TRIM10
ENSG00000106541	17062.67438	3.017023587	0.355580478	8.484784101	2.16E-17	6.40E-16	AGR2
ENSG00000156510	433.6884436	3.014804335	0.319292196	9.442148524	3.65E-21	1.60E-19	HKDC1
ENSG00000111783	5.000762753	3.013938737	0.51015365	5.907903896	3.46E-09	3.55E-08	RFX4
ENSG00000225530	0.734414812	3.013829664	0.575711033	5.234969438	1.65E-07	1.26E-06	NA
ENSG00000204930	11.09783344	3.010209509	0.263552143	11.42168482	3.26E-30	3.36E-28	FAM221B
ENSG00000242953	2.124786918	3.004102519	0.454801579	6.605303631	3.97E-11	5.44E-10	NA
ENSG00000184709	49.87551999	3.004078434	0.37603511	7.988824329	1.36E-15	3.26E-14	LRRC26
ENSG00000187492	46.8431789	3.001719211	0.269794486	11.12594721	9.38E-29	8.47E-27	CDHR4
ENSG00000186710	132.7094346	3.00063597	0.244607611	12.26714064	1.36E-34	1.90E-32	CFAP73
ENSG00000112303	339.8058891	3.000331321	0.283649116	10.57761562	3.78E-26	2.70E-24	VNN2
ENSG00000264443	2.84389205	3.000050706	0.390781011	7.677063686	1.63E-14	3.39E-13	NA
ENSG00000167798	3.708152345	2.998720027	0.486606111	6.162520274	7.16E-10	8.16E-09	C3P1
ENSG00000181123	3.563502348	2.996911905	0.404522444	7.408518247	1.28E-13	2.42E-12	LOC107985579
ENSG00000236202	1.110177284	2.996077485	0.513450144	5.835186763	5.37E-09	5.34E-08	GRM7-AS1
ENSG00000256615	0.611401623	2.995905948	0.987147579	3.034911912	0.002406059	0.007455645	NA
ENSG00000233256	1.430642929	2.99409289	0.430299656	6.958157758	3.45E-12	5.48E-11	NA
ENSG00000170927	56.67625778	2.991497261	0.449607066	6.653581506	2.86E-11	3.99E-10	PKHD1
ENSG00000180305	0.409076725	2.991260263	0.690480037	4.332145903	1.48E-05	7.79E-05	WFDC10A
ENSG00000188993	33.09942604	2.989792864	0.256146152	11.67221461	1.77E-31	2.05E-29	LRRC66
ENSG00000188517	38.18919979	2.988836852	0.395990296	7.547752765	4.43E-14	8.82E-13	COL25A1
ENSG00000261210	0.712946608	2.984283158	0.404358491	7.380290567	1.58E-13	2.96E-12	CLEC19A
ENSG00000243232	35.0797371	2.982913518	0.447606792	6.664138185	2.66E-11	3.73E-10	PCDHAC2
ENSG00000275410	251.0644029	2.98111895	0.491859027	6.060921495	1.35E-09	1.47E-08	HNF1B
ENSG00000235246	2.004997226	2.977948611	0.304615723	9.776083073	1.43E-22	7.42E-21	NA
ENSG00000252692	0.991278899	2.977717232	0.578666977	5.145821949	2.66E-07	1.96E-06	NA
ENSG00000104435	117.9715662	2.973657794	0.324997904	9.14977529	5.71E-20	2.22E-18	STMN2
ENSG00000101842	175.2940645	2.973145283	0.254364527	11.68852166	1.46E-31	1.70E-29	VSIG1
ENSG00000258386	4.156605262	2.973031415	0.514868927	5.774346173	7.73E-09	7.50E-08	NA
ENSG00000261728	0.624479379	2.972792491	0.535116594	5.55541077	2.77E-08	2.44E-07	NA
ENSG00000118997	92.9413621	2.971720798	0.228310668	13.01612762	9.91E-39	1.89E-36	DNAH7
ENSG00000281106	7.395891103	2.962371672	0.306719166	9.658254187	4.54E-22	2.21E-20	TMEM272
ENSG00000262188	25.24919643	2.958078354	0.328241996	9.011882658	2.03E-19	7.36E-18	LINC01978
ENSG00000178401	561.077425	2.95429261	0.273224562	10.81269044	3.00E-27	2.40E-25	DNAJC22
ENSG00000178287	0.527931206	2.948801491	0.908180243	3.246934198	0.001166554	0.003940437	SPAG11A
ENSG00000279798	0.547838839	2.947700484	0.68406647	4.309084882	1.64E-05	8.59E-05	NA
ENSG00000274979	10.42108356	2.945917931	0.337914919	8.717928	2.83E-18	9.31E-17	NA
ENSG00000280265	1.406218987	2.945179819	0.361450298	8.148229052	3.69E-16	9.51E-15	NA
ENSG00000239212	0.748897335	2.942963246	0.445282511	6.609204656	3.86E-11	5.32E-10	RPL6P7
ENSG00000234667	7.270839283	2.940162021	0.296867347	9.903958948	4.00E-23	2.21E-21	ACTL11P
ENSG00000176956	15.8994158	2.938661214	0.306485715	9.588248566	8.96E-22	4.24E-20	LY6H
ENSG00000235961	170.9435931	2.938267546	0.303315009	9.687181497	3.42E-22	1.69E-20	PNMA6A
ENSG00000254111	0.450345413	2.934956462	0.535622387	5.479525375	4.26E-08	3.63E-07	NA
ENSG00000140835	83.62740604	2.934558687	0.411210241	7.136394953	9.58E-13	1.63E-11	CHST4
ENSG00000173376	94.08423817	2.934255627	0.33144351	8.852958476	8.52E-19	2.95E-17	NDNF
ENSG00000178623	450.171364	2.93367673	0.248324451	11.8138859	3.31E-32	3.99E-30	GPR35
ENSG00000253696	4.721518414	2.933231916	0.374090448	7.840969832	4.47E-15	9.99E-14	KBTBD11-OT1
ENSG00000269043	1.577616257	2.93156994	0.930488802	3.150569823	0.001629523	0.005289066	LOC105372316
ENSG00000145384	3.380384948	2.931407723	0.414118034	7.078676805	1.46E-12	2.42E-11	FABP2
ENSG00000274719	9.978013835	2.929719273	0.445052707	6.582859131	4.61E-11	6.28E-10	NA
ENSG00000215397	0.639181474	2.929232618	0.539115436	5.433405206	5.53E-08	4.61E-07	SCRT2
ENSG00000271850	0.666564127	2.928352287	0.518883649	5.643562465	1.67E-08	1.53E-07	LINC02343
ENSG00000267420	0.65661125	2.927107751	0.477013828	6.136316352	8.45E-10	9.52E-09	NA
ENSG00000179023	359.4085244	2.924003445	0.381857637	7.657312991	1.90E-14	3.92E-13	KLHDC7A
ENSG00000103460	401.8758229	2.923637451	0.568823719	5.139795253	2.75E-07	2.02E-06	TOX3
ENSG00000232906	1.325069813	2.923236127	0.532976304	5.484739387	4.14E-08	3.53E-07	LOC100533634
ENSG00000168412	3.6240016	2.920381362	0.431479509	6.768296764	1.30E-11	1.90E-10	MTNR1A
ENSG00000244383	3.292587091	2.917064221	0.315300694	9.25168983	2.21E-20	8.99E-19	FAM3D-AS1
ENSG00000101074	2.627564995	2.916446315	0.769423245	3.790431773	0.000150386	0.000631774	R3HDML
ENSG00000260878	0.490408377	2.915891739	0.670078734	4.351565852	1.35E-05	7.20E-05	NA
ENSG00000197748	102.52901	2.909123478	0.234101342	12.42676976	1.87E-35	2.78E-33	CFAP43
ENSG00000247011	4.182406927	2.908538011	0.395860385	7.347383382	2.02E-13	3.73E-12	NA
ENSG00000109511	60.64132245	2.9062115	0.453318721	6.410967308	1.45E-10	1.83E-09	ANXA10
ENSG00000226355	1.486896324	2.905757254	0.402283612	7.223155916	5.08E-13	8.93E-12	LOC105376291
ENSG00000183304	1.002269309	2.903672403	0.703874767	4.125268498	3.70E-05	0.000179752	FAM9A
ENSG00000177994	4.585098828	2.903543796	0.328214344	8.846486597	9.03E-19	3.11E-17	C2orf73
ENSG00000204815	96.18401	2.902186139	0.242640967	11.96082495	5.70E-33	7.09E-31	TTC25
ENSG00000279693	11.26803373	2.901871316	0.282982899	10.25458192	1.13E-24	7.09E-23	NA
ENSG00000160188	230.8890192	2.901446729	0.242710276	11.95436294	6.16E-33	7.64E-31	RSPH1
ENSG00000244167	0.662307379	2.898745798	0.435648069	6.653870423	2.85E-11	3.99E-10	NA
ENSG00000175018	5.643119792	2.898360625	0.569600699	5.08840777	3.61E-07	2.60E-06	TEX36
ENSG00000271225	0.357740469	2.894901852	0.844253873	3.42894708	0.000605928	0.002211032	BNIP3P4
ENSG00000255410	2.022211954	2.893218709	0.301936122	9.582221202	9.50E-22	4.48E-20	NA
ENSG00000148604	0.965719503	2.892783433	0.57090007	5.067057411	4.04E-07	2.89E-06	RGR
ENSG00000259871	1.406161228	2.892720871	0.356479339	8.11469433	4.87E-16	1.24E-14	NA
ENSG00000124664	1804.195171	2.890341705	0.384421005	7.518688276	5.53E-14	1.09E-12	SPDEF
ENSG00000114854	308.5673095	2.889415729	0.34980046	8.260182762	1.45E-16	3.94E-15	TNNC1
ENSG00000158528	304.9782106	2.887620297	0.376421345	7.671244827	1.70E-14	3.54E-13	PPP1R9A
ENSG00000162174	1653.385545	2.88710182	0.268244413	10.76295231	5.15E-27	4.02E-25	ASRGL1
ENSG00000229005	0.450023861	2.884672793	0.64052497	4.503607084	6.68E-06	3.79E-05	HNF4A-AS1
ENSG00000117834	40.11351425	2.883235957	0.280790683	10.26827501	9.79E-25	6.21E-23	SLC5A9
ENSG00000250344	0.316198174	2.878405829	0.826405978	3.483040908	0.000495753	0.001844653	NA
ENSG00000125798	280.1371497	2.877568442	0.6302454	4.565790474	4.98E-06	2.90E-05	FOXA2
ENSG00000188959	557.3554022	2.876212903	0.37609751	7.64751913	2.05E-14	4.21E-13	C9orf152
ENSG00000149260	1819.940129	2.874724051	0.232652162	12.35631782	4.50E-35	6.54E-33	CAPN5
ENSG00000203985	101.1486262	2.874707476	0.370826495	7.752163117	9.03E-15	1.94E-13	LDLRAD1
ENSG00000118307	65.30050172	2.873931247	0.261199374	11.00282595	3.70E-28	3.18E-26	CFAP94
ENSG00000205038	87.4501138	2.871033263	0.401474324	7.151225108	8.60E-13	1.47E-11	PKHD1L1
ENSG00000168952	473.4264664	2.871023335	0.365154566	7.862487838	3.77E-15	8.52E-14	STXBP6
ENSG00000255118	2.658935904	2.870118353	0.471531928	6.086795361	1.15E-09	1.27E-08	NA
ENSG00000274520	7.832767736	2.869645405	0.527809865	5.436892327	5.42E-08	4.54E-07	NA
ENSG00000103316	328.5785227	2.869309659	0.381337662	7.524328037	5.30E-14	1.05E-12	CRYM
ENSG00000166006	1.118159681	2.86776437	0.547916966	5.233939718	1.66E-07	1.27E-06	KCNC2
ENSG00000125879	0.436157099	2.867228423	0.699872582	4.096786322	4.19E-05	0.000200915	OTOR
ENSG00000258616	14.36538558	2.866887825	0.54020281	5.307058333	1.11E-07	8.80E-07	LINC02303
ENSG00000146216	48.58145811	2.866454249	0.238809459	12.0031018	3.42E-33	4.35E-31	TTBK1
ENSG00000255794	4.686279792	2.865496673	0.552503958	5.186382163	2.14E-07	1.60E-06	RMST
ENSG00000225802	3.554791523	2.864073514	0.447761745	6.396422976	1.59E-10	2.00E-09	WARS1P1
ENSG00000258630	0.634707141	2.863809607	0.422971181	6.770696764	1.28E-11	1.87E-10	LINC02292
ENSG00000166984	1.09495187	2.861640176	0.544979027	5.250917989	1.51E-07	1.16E-06	NA
ENSG00000259749	0.902314282	2.855730853	0.643966602	4.434594661	9.22E-06	5.08E-05	NCAPGP2
ENSG00000261863	1.175954751	2.852249296	0.522683987	5.456928792	4.84E-08	4.08E-07	LINC01996
ENSG00000207242	0.379774625	2.851134584	0.694476729	4.105442942	4.04E-05	0.00019425	RNU6-1065P
ENSG00000230852	0.578552855	2.849040401	0.632348904	4.505488002	6.62E-06	3.76E-05	LINC02857
ENSG00000269779	0.806921466	2.848950134	0.910659967	3.128445565	0.001757336	0.005653804	NA
ENSG00000233392	31.48245268	2.848458636	0.508451805	5.602219538	2.12E-08	1.91E-07	UICLM
ENSG00000171431	15.58622057	2.847352511	0.415496903	6.852885043	7.24E-12	1.09E-10	KRT20
ENSG00000259910	0.383273729	2.838593287	0.763377243	3.718467265	0.000200435	0.000817833	NA
ENSG00000108176	296.1104478	2.838048197	0.290065343	9.784168505	1.32E-22	6.89E-21	DNAJC12
ENSG00000242790	0.315274087	2.834952187	0.695677995	4.075092507	4.60E-05	0.000218589	NA
ENSG00000223823	11.79319104	2.833684932	0.337567637	8.394421217	4.68E-17	1.34E-15	LINC01342
ENSG00000186094	9.980371428	2.833318327	0.423846029	6.684782055	2.31E-11	3.28E-10	AGBL4
ENSG00000184956	1151.834629	2.829340758	0.522089051	5.419268515	5.98E-08	4.96E-07	MUC6
ENSG00000253764	3.786995811	2.828408215	0.398064783	7.105396755	1.20E-12	2.01E-11	LOC101928058
ENSG00000277749	7.372306525	2.827884886	0.579618949	4.878868938	1.07E-06	7.06E-06	NA
ENSG00000197322	0.487600803	2.82765446	0.567447717	4.983110119	6.26E-07	4.31E-06	C17orf102
ENSG00000088992	686.9559058	2.827445101	0.355120336	7.961935185	1.69E-15	4.01E-14	TESC
ENSG00000133640	101.8929482	2.826031705	0.372242806	7.591904157	3.15E-14	6.38E-13	LRRIQ1
ENSG00000204603	0.840771474	2.825515975	0.688022196	4.106722122	4.01E-05	0.000193344	LINC01257
ENSG00000276048	3.62158194	2.823564869	0.582014957	4.851361351	1.23E-06	8.02E-06	NA
ENSG00000214111	0.538013775	2.822773228	0.61522492	4.588197155	4.47E-06	2.63E-05	NA
ENSG00000277011	5.985565971	2.822625267	0.470751549	5.995997826	2.02E-09	2.14E-08	NA
ENSG00000228835	10.14474869	2.821692408	0.589137284	4.789532907	1.67E-06	1.06E-05	NA
ENSG00000149435	1.227432042	2.821030642	0.438472913	6.433762625	1.24E-10	1.59E-09	GGTLC1
ENSG00000233633	2.148829681	2.813710916	0.859576106	3.273370324	0.001062731	0.003632328	LOC105373352
ENSG00000164690	209.6793696	2.806453561	0.434554023	6.458238595	1.06E-10	1.36E-09	SHH
ENSG00000142606	128.9161022	2.799914336	0.255483592	10.95927263	6.00E-28	5.11E-26	MMEL1
ENSG00000160862	659.8990814	2.799479328	0.399047653	7.015401067	2.29E-12	3.72E-11	AZGP1
ENSG00000205517	700.5964891	2.799432939	0.334175205	8.377141373	5.42E-17	1.54E-15	RGL3
ENSG00000276715	15.32980576	2.799415814	0.414081551	6.760542227	1.37E-11	2.00E-10	YWHAEP7
ENSG00000252580	0.356722856	2.79794429	0.915828191	3.055097362	0.002249875	0.007036785	NA
ENSG00000259171	6.852908366	2.793646815	0.222467515	12.55754944	3.61E-36	5.69E-34	NA
ENSG00000235688	34.19422895	2.790909671	0.554681519	5.031553377	4.87E-07	3.42E-06	NA
ENSG00000249885	2.509730883	2.789812879	0.502438952	5.552540992	2.82E-08	2.48E-07	ARHGEF38-IT1
ENSG00000156006	9.604203387	2.785911283	0.322380362	8.641690402	5.54E-18	1.77E-16	NAT2
ENSG00000225498	1.285573077	2.785196814	0.31082227	8.960737643	3.23E-19	1.16E-17	NA
ENSG00000222760	0.716429692	2.780851452	0.353474696	7.867186775	3.63E-15	8.23E-14	RNU4-53P
ENSG00000105650	318.9719849	2.776728444	0.2828455	9.817120813	9.50E-23	5.07E-21	PDE4C
ENSG00000234685	69.14117354	2.776197374	0.493770171	5.622448536	1.88E-08	1.71E-07	NA
ENSG00000123191	765.9266006	2.775310294	0.270779619	10.2493323	1.19E-24	7.45E-23	ATP7B
ENSG00000165495	62.9256646	2.772808778	0.321346028	8.628732082	6.20E-18	1.97E-16	PKNOX2
ENSG00000189157	66.41654934	2.771958316	0.202296258	13.70246954	9.81E-43	2.37E-40	FAM47E
ENSG00000251461	0.513935293	2.771134406	0.594890201	4.658228363	3.19E-06	1.92E-05	NA
ENSG00000204140	44.9885937	2.771096874	0.473038852	5.858074583	4.68E-09	4.71E-08	CLPSL1
ENSG00000188488	118.7755263	2.77107998	0.351522807	7.8830731	3.19E-15	7.32E-14	SERPINA5
ENSG00000259433	1.176326255	2.770084517	0.345366868	8.020701392	1.05E-15	2.56E-14	NA
ENSG00000206113	12.1002913	2.766764728	0.287376121	9.627677883	6.11E-22	2.94E-20	CFAP99
ENSG00000204610	245.2324132	2.763676655	0.373754054	7.394372389	1.42E-13	2.68E-12	TRIM15
ENSG00000182901	12.08899231	2.763426802	0.494338198	5.590154294	2.27E-08	2.04E-07	RGS7
ENSG00000245330	5.524067015	2.76260796	0.234301962	11.79080163	4.35E-32	5.22E-30	NA
ENSG00000274718	1.946084297	2.760179607	0.51049201	5.406900698	6.41E-08	5.28E-07	NA
ENSG00000268324	1.198231987	2.758127472	0.288441413	9.562175701	1.15E-21	5.39E-20	LRRC2-AS1
ENSG00000004799	597.6434674	2.757289371	0.297306093	9.274244403	1.79E-20	7.37E-19	PDK4
ENSG00000135220	1.757489748	2.756571335	0.736855786	3.74099164	0.000183296	0.000754736	UGT2A3
ENSG00000004838	383.9891772	2.755729179	0.304535152	9.048969103	1.44E-19	5.36E-18	ZMYND10
ENSG00000277893	15.14218686	2.752844616	0.313720039	8.774844675	1.71E-18	5.75E-17	SRD5A2
ENSG00000138100	227.2179781	2.752813243	0.404863298	6.799364766	1.05E-11	1.55E-10	TRIM54
ENSG00000224276	2.543049585	2.750834076	0.308981957	8.902895502	5.44E-19	1.92E-17	ARHGEF2-AS1
ENSG00000215160	0.668460216	2.749966727	0.542356213	5.070406978	3.97E-07	2.84E-06	NA
ENSG00000107242	319.0834368	2.749001886	0.265921403	10.33764811	4.76E-25	3.10E-23	PIP5K1B
ENSG00000228723	2.688236828	2.746430907	0.457752847	5.999811741	1.98E-09	2.09E-08	SRGAP3-AS2
ENSG00000234928	5.160734041	2.74628347	0.492329334	5.578143088	2.43E-08	2.17E-07	LINC01659
ENSG00000170482	67.58475158	2.742202865	0.203499572	13.47522669	2.19E-41	4.84E-39	SLC23A1
ENSG00000260604	24.76094953	2.741351269	0.357892711	7.659701321	1.86E-14	3.86E-13	NA
ENSG00000225969	123.8122139	2.74121239	0.276989605	9.896444991	4.31E-23	2.38E-21	NA
ENSG00000109956	104.8398286	2.738240872	0.270196811	10.13424571	3.89E-24	2.34E-22	B3GAT1
ENSG00000261713	109.1555119	2.737749865	0.477009702	5.739400796	9.50E-09	9.10E-08	SSTR5-AS1
ENSG00000178752	341.2510949	2.734913212	0.251134794	10.89022024	1.28E-27	1.06E-25	ERFE
ENSG00000251393	1.55677127	2.734671709	0.454413402	6.018026088	1.77E-09	1.88E-08	NA
ENSG00000277396	1.506227216	2.734389971	0.258458991	10.5795893	3.71E-26	2.65E-24	NA
ENSG00000240665	1.989427668	2.733953023	0.497450619	5.495928479	3.89E-08	3.33E-07	LSP1P2
ENSG00000235269	1.787650992	2.733550962	0.642007362	4.257818718	2.06E-05	0.000105997	LINC02331
ENSG00000124253	78.76874006	2.733295934	0.539209602	5.069078745	4.00E-07	2.86E-06	PCK1
ENSG00000250940	0.858973216	2.730610762	0.415239605	6.575988239	4.83E-11	6.55E-10	NA
ENSG00000272050	0.366026951	2.730107982	0.859038929	3.178095764	0.001482458	0.004871448	NA
ENSG00000239508	0.437140008	2.730087899	0.536593702	5.087812038	3.62E-07	2.61E-06	NA
ENSG00000229960	0.493073542	2.727943176	0.677731618	4.02510832	5.69E-05	0.000265237	NA
ENSG00000230860	0.314673858	2.727872939	0.804561493	3.390508943	0.00069763	0.002502538	NA
ENSG00000259561	1.583555722	2.726304047	0.364904323	7.471284595	7.94E-14	1.53E-12	NA
ENSG00000259092	11.51035266	2.725919788	0.371946773	7.328789986	2.32E-13	4.25E-12	TRAV30
ENSG00000164588	1.865351723	2.721460424	0.56135509	4.848019501	1.25E-06	8.15E-06	HCN1
ENSG00000142789	0.666942711	2.72064539	0.511428596	5.319697432	1.04E-07	8.24E-07	CELA3A
ENSG00000234692	4.811925586	2.720251934	0.354235959	7.679208912	1.60E-14	3.33E-13	NA
ENSG00000152953	93.73450526	2.719443158	0.259720727	10.47064357	1.18E-25	8.09E-24	STK32B
ENSG00000197168	85.65632676	2.718935843	0.180429577	15.06923582	2.58E-51	1.12E-48	NEK5
ENSG00000207923	4.16574691	2.718869167	0.265830514	10.22782949	1.49E-24	9.24E-23	MIR559
ENSG00000261829	6.246612402	2.717907235	0.337427772	8.054782274	7.96E-16	1.97E-14	NA
ENSG00000170788	3.126374613	2.716586895	0.402352571	6.751757271	1.46E-11	2.12E-10	DYDC1
ENSG00000197046	46.31026577	2.716298635	0.252620538	10.75248537	5.77E-27	4.46E-25	SIGLEC15
ENSG00000262213	0.606772825	2.709017011	0.433707927	6.246178223	4.21E-10	4.97E-09	NA
ENSG00000236772	6.884940082	2.708340731	0.262315258	10.32475485	5.45E-25	3.53E-23	NA
ENSG00000250256	0.540587138	2.707661395	0.593456362	4.56252821	5.05E-06	2.94E-05	NA
ENSG00000187726	78.76547007	2.70543504	0.285019567	9.492102831	2.26E-21	1.02E-19	DNAJB13
ENSG00000198734	222.2521237	2.704904166	0.279976747	9.661174361	4.41E-22	2.15E-20	F5
ENSG00000165188	287.6216558	2.704730373	0.304273347	8.889146548	6.16E-19	2.16E-17	RNF183
ENSG00000272502	32.8466822	2.702970167	0.27313174	9.896214082	4.32E-23	2.38E-21	NA
ENSG00000249364	4.670312792	2.701175194	0.440007335	6.138932195	8.31E-10	9.37E-09	LOC101928858
ENSG00000239994	0.312717287	2.700113545	0.657885062	4.104232945	4.06E-05	0.000195221	NA
ENSG00000177335	149.8427481	2.699152725	0.318121778	8.484652464	2.16E-17	6.40E-16	C8orf31
ENSG00000135472	179.5023307	2.699141099	0.285243833	9.462574761	3.00E-21	1.33E-19	FAIM2
ENSG00000188817	10.07691132	2.69730174	0.490760893	5.496162753	3.88E-08	3.33E-07	SNTN
ENSG00000021300	564.7704646	2.696630766	0.254566664	10.59302395	3.21E-26	2.30E-24	PLEKHB1
ENSG00000272428	1.863762939	2.693061037	0.555580975	4.84728808	1.25E-06	8.18E-06	NA
ENSG00000262198	87.67197438	2.692270025	0.562828223	4.783466632	1.72E-06	1.09E-05	NA
ENSG00000270988	0.749330442	2.692055839	0.461996921	5.826999529	5.64E-09	5.60E-08	NA
ENSG00000272414	0.971808441	2.691482068	0.282905833	9.513702993	1.84E-21	8.37E-20	FAM47E-STBD1
ENSG00000163424	2.982280043	2.687614999	0.616672511	4.358253288	1.31E-05	7.00E-05	TEX55
ENSG00000133101	314.7648271	2.686474773	0.441324584	6.08729917	1.15E-09	1.27E-08	CCNA1
ENSG00000237720	0.458225092	2.684784082	0.846569735	3.171367899	0.001517229	0.004968622	NA
ENSG00000266373	10.52130968	2.683996118	0.432777745	6.201788681	5.58E-10	6.51E-09	NA
ENSG00000259359	1.275636876	2.68198922	0.374080542	7.169550194	7.52E-13	1.30E-11	NA
ENSG00000214491	61.20801559	2.680936452	0.29349197	9.134616038	6.56E-20	2.53E-18	SEC14L6
ENSG00000233110	11.83777818	2.678568137	0.341458568	7.844489455	4.35E-15	9.76E-14	NA
ENSG00000187905	8.538726306	2.678351118	0.342028071	7.830793263	4.85E-15	1.08E-13	LRRC74B
ENSG00000275239	0.409356322	2.677581627	0.477137148	5.611765163	2.00E-08	1.81E-07	FAM242F
ENSG00000167183	1625.810824	2.677083525	0.275608934	9.713340891	2.65E-22	1.33E-20	PRR15L
ENSG00000267038	0.534076659	2.675773387	0.584931363	4.574508322	4.77E-06	2.79E-05	NA
ENSG00000104313	107.6128221	2.671559122	0.408422518	6.541165097	6.10E-11	8.17E-10	EYA1
ENSG00000237464	0.498022726	2.669995883	0.460831343	5.793867805	6.88E-09	6.72E-08	NA
ENSG00000203952	95.98343189	2.668276084	0.352620833	7.566983665	3.82E-14	7.66E-13	CCDC160
ENSG00000253521	0.443845885	2.664861753	0.449925459	5.922896109	3.16E-09	3.25E-08	HPYR1
ENSG00000159212	2485.431833	2.661097209	0.351571886	7.569141095	3.76E-14	7.54E-13	CLIC6
ENSG00000129654	2493.359388	2.65919784	0.391395028	6.794153344	1.09E-11	1.61E-10	FOXJ1
ENSG00000101194	655.3393796	2.659169344	0.189709948	14.01702639	1.23E-44	3.38E-42	SLC17A9
ENSG00000101448	4.590641632	2.657248796	0.443311689	5.994086918	2.05E-09	2.16E-08	EPPIN
ENSG00000122585	3.64824633	2.656816692	0.828811492	3.205574146	0.001347933	0.004477455	NPY
ENSG00000078579	2.940840113	2.655772285	0.536676815	4.948550434	7.48E-07	5.08E-06	FGF20
ENSG00000150893	337.3220172	2.655681673	0.502309686	5.286941003	1.24E-07	9.72E-07	FREM2
ENSG00000173585	4.321791267	2.654946501	0.293168465	9.056043939	1.35E-19	5.04E-18	CCR9
ENSG00000257771	3.975817332	2.65456709	0.406784149	6.525738768	6.77E-11	8.98E-10	LINC02395
ENSG00000164287	15.68247697	2.652875715	0.362540081	7.317468751	2.53E-13	4.60E-12	CDC20B
ENSG00000112530	39.63776544	2.652123928	0.333395462	7.954889094	1.79E-15	4.23E-14	PACRG
ENSG00000185156	114.9677203	2.651769401	0.33525498	7.90970921	2.58E-15	5.96E-14	MFSD6L
ENSG00000156427	104.012545	2.651086063	0.323798972	8.187444339	2.67E-16	6.97E-15	FGF18
ENSG00000197415	94.91908956	2.650820576	0.302193089	8.771943078	1.76E-18	5.88E-17	VEPH1
ENSG00000267881	1.027307512	2.648976561	0.522806169	5.066842582	4.04E-07	2.89E-06	NA
ENSG00000230731	2.937720423	2.646919656	0.356007798	7.435004708	1.05E-13	2.00E-12	NA
ENSG00000237862	3.832576569	2.64321058	0.500972731	5.276156595	1.32E-07	1.03E-06	LOC100506271
ENSG00000131044	46.62432531	2.642941754	0.267749222	9.870959593	5.56E-23	3.04E-21	TTLL9
ENSG00000279286	18.15983512	2.642353884	0.340873413	7.75171599	9.07E-15	1.95E-13	NA
ENSG00000242034	0.924507806	2.638149317	0.402575499	6.553179034	5.63E-11	7.57E-10	NA
ENSG00000279379	3.287964299	2.638065812	0.850784676	3.100744391	0.001930348	0.006146134	NA
ENSG00000083622	0.49974009	2.635948757	0.586241106	4.496356072	6.91E-06	3.91E-05	NA
ENSG00000184454	193.0963723	2.63416311	0.3401904	7.743202369	9.69E-15	2.08E-13	NCMAP
ENSG00000223991	1.371594575	2.631321797	0.522439443	5.036606312	4.74E-07	3.34E-06	NA
ENSG00000274478	0.73923586	2.626235737	0.622255021	4.220513531	2.44E-05	0.000123045	NA
ENSG00000157388	232.4750685	2.624901896	0.25745289	10.19565908	2.07E-24	1.27E-22	CACNA1D
ENSG00000251138	1.738697693	2.623984144	0.739504832	3.548298849	0.000387728	0.001480591	LINC02882
ENSG00000179673	14.33353311	2.622483161	0.598347377	4.382877344	1.17E-05	6.31E-05	RPRML
ENSG00000167861	2162.873256	2.621203221	0.240266714	10.9095562	1.04E-27	8.72E-26	HID1
ENSG00000172410	0.837133271	2.619966464	0.417378781	6.277191324	3.45E-10	4.13E-09	INSL5
ENSG00000159409	6.942656008	2.617123003	0.331558164	7.893405405	2.94E-15	6.75E-14	CELF3
ENSG00000235523	1.897262553	2.6146498	0.409328516	6.387656113	1.68E-10	2.11E-09	NA
ENSG00000099617	24.6124673	2.61435618	0.385957471	6.773689788	1.26E-11	1.84E-10	EFNA2
ENSG00000255367	4.927857208	2.611967707	0.28313498	9.225167832	2.83E-20	1.13E-18	LOC101927708
ENSG00000154319	459.7911971	2.611192443	0.265633914	9.830041666	8.36E-23	4.47E-21	FAM167A
ENSG00000259798	1.140687979	2.61096549	0.544382473	4.796196825	1.62E-06	1.03E-05	NA
ENSG00000260740	9.780657432	2.601705992	0.297438049	8.747051688	2.19E-18	7.26E-17	NA
ENSG00000012504	2.99001229	2.601385516	0.550949888	4.721637256	2.34E-06	1.45E-05	NR1H4
ENSG00000151322	125.0811082	2.600697082	0.33359588	7.795950849	6.39E-15	1.40E-13	NPAS3
ENSG00000232872	7.326829627	2.59864171	0.378909956	6.858203824	6.97E-12	1.06E-10	CTAGE3P
ENSG00000279127	1.648480209	2.597479363	0.757135149	3.430668047	0.000602097	0.002198897	NA
ENSG00000213085	325.0884984	2.596985927	0.257318539	10.09249445	5.96E-24	3.52E-22	CFAP45
ENSG00000237068	0.554322692	2.596479447	0.413262745	6.282878084	3.32E-10	3.99E-09	RPL5P2
ENSG00000019102	416.7655741	2.595660675	0.319660983	8.120042207	4.66E-16	1.19E-14	VSIG2
ENSG00000182329	3.64934275	2.592867677	0.271722748	9.542328321	1.40E-21	6.45E-20	KIAA2012
ENSG00000276121	1.669616278	2.59201603	0.415018994	6.245535913	4.22E-10	4.99E-09	NA
ENSG00000131951	8.579130608	2.590114899	0.452670238	5.721858167	1.05E-08	1.00E-07	LRRC9
ENSG00000112782	477.0052269	2.589861641	0.277748543	9.324483276	1.12E-20	4.66E-19	CLIC5
ENSG00000230126	0.839108705	2.586086951	0.647251211	3.995491868	6.46E-05	0.000296963	FGF12-AS2
ENSG00000157613	2236.467192	2.582769178	0.279044518	9.25576033	2.13E-20	8.69E-19	CREB3L1
ENSG00000100170	914.030326	2.581162782	0.337054066	7.658008152	1.89E-14	3.90E-13	SLC5A1
ENSG00000254202	2.154067214	2.579986319	0.844026497	3.056759862	0.002237434	0.007001229	NA
ENSG00000168658	49.81150255	2.579770682	0.263770488	9.780361325	1.37E-22	7.14E-21	VWA3B
ENSG00000261244	0.363890877	2.578927303	0.870888798	2.961259015	0.003063842	0.009212685	NA
ENSG00000223999	0.441792144	2.578814256	0.789507021	3.266360129	0.001089396	0.003712778	NA
ENSG00000197249	7475.652638	2.577500536	0.267550763	9.633687845	5.76E-22	2.79E-20	SERPINA1
ENSG00000257062	0.641061036	2.577331786	0.719564942	3.581791767	0.000341246	0.001319814	NA
ENSG00000166736	164.1835667	2.57720765	0.41709158	6.178997068	6.45E-10	7.42E-09	HTR3A
ENSG00000257660	32.38078728	2.572264753	0.28481266	9.031427034	1.69E-19	6.24E-18	ADCY6-DT
ENSG00000188778	3.705472854	2.571568913	0.373820896	6.879147042	6.02E-12	9.19E-11	ADRB3
ENSG00000150627	11.28106192	2.569935739	0.313757365	8.190837974	2.59E-16	6.80E-15	WDR17
ENSG00000181322	33.08590928	2.569825374	0.180108286	14.26822399	3.45E-46	1.13E-43	NME9
ENSG00000197353	1385.086801	2.56945389	0.484608319	5.302125013	1.14E-07	9.01E-07	LYPD2
ENSG00000268883	3.830318655	2.568471268	0.659612823	3.893907423	9.86E-05	0.000433648	NA
ENSG00000112319	198.187689	2.567225993	0.402435072	6.379230265	1.78E-10	2.22E-09	EYA4
ENSG00000215023	5.205636838	2.564914553	0.371982555	6.89525495	5.38E-12	8.28E-11	NA
ENSG00000081842	9.860140135	2.564675889	0.394361019	6.503370677	7.85E-11	1.03E-09	PCDHA6
ENSG00000198429	123.0267032	2.56465283	0.238713918	10.74362504	6.35E-27	4.90E-25	ZNF69
ENSG00000183831	45.4391749	2.564534202	0.338685071	7.572032012	3.67E-14	7.38E-13	ANKRD45
ENSG00000261664	10.25303432	2.564528694	0.297464476	8.621293969	6.62E-18	2.10E-16	TTC39A-AS1
ENSG00000223723	8.707890658	2.564148816	0.29872828	8.583548967	9.20E-18	2.85E-16	NA
ENSG00000239216	0.378311115	2.563497502	0.543301003	4.718374322	2.38E-06	1.47E-05	NA
ENSG00000258135	1.05965433	2.562419702	0.420364256	6.095712618	1.09E-09	1.21E-08	LINC02396
ENSG00000139445	41.68195186	2.560735923	0.542289307	4.722084485	2.33E-06	1.45E-05	FOXN4
ENSG00000169906	0.441116286	2.558029988	0.611941235	4.180188945	2.91E-05	0.000144593	S100G
ENSG00000141519	297.5388303	2.557525417	0.226231121	11.30492307	1.24E-29	1.21E-27	CCDC40
ENSG00000277809	0.911363112	2.554593872	0.526592286	4.851179818	1.23E-06	8.03E-06	NA
ENSG00000140795	27.40782054	2.553473145	0.296657648	8.60747452	7.47E-18	2.35E-16	MYLK3
ENSG00000156968	440.4493705	2.550576424	0.289474717	8.811050767	1.24E-18	4.21E-17	MPV17L
ENSG00000224383	105.8951978	2.548276334	0.218069106	11.68563663	1.51E-31	1.76E-29	PRR29
ENSG00000196711	6.566096961	2.54745232	0.565042077	4.508429412	6.53E-06	3.72E-05	ALKAL1
ENSG00000233817	2.852525054	2.544371029	0.331940881	7.665133079	1.79E-14	3.71E-13	NA
ENSG00000211454	73.03292844	2.543880448	0.185784179	13.69266457	1.12E-42	2.70E-40	AKR7L
ENSG00000250120	26.8861497	2.543558238	0.323786202	7.855672109	3.98E-15	8.97E-14	PCDHA10
ENSG00000250541	0.848052903	2.543386384	0.289087325	8.79798649	1.39E-18	4.71E-17	NA
ENSG00000137090	48.43340277	2.543308842	0.477210179	5.329536025	9.85E-08	7.84E-07	DMRT1
ENSG00000261121	5.638868372	2.54206826	0.425943647	5.968085868	2.40E-09	2.51E-08	LINC02473
ENSG00000180318	42.16537033	2.537249523	0.539667056	4.701509007	2.58E-06	1.58E-05	ALX1
ENSG00000176029	27.32716366	2.535122812	0.284268653	8.918052637	4.75E-19	1.68E-17	C11orf16
ENSG00000111837	95.19526134	2.534452451	0.222027096	11.41505924	3.52E-30	3.62E-28	MAK
ENSG00000154252	53.6673273	2.534428703	0.35062539	7.228309109	4.89E-13	8.63E-12	GAL3ST2
ENSG00000047457	4882.727439	2.532758894	0.396218108	6.392335035	1.63E-10	2.05E-09	CP
ENSG00000129170	1.145105953	2.531935966	0.3982456	6.357724892	2.05E-10	2.53E-09	CSRP3
ENSG00000005187	265.0300675	2.530679726	0.235929058	10.72644356	7.65E-27	5.85E-25	ACSM3
ENSG00000105388	25699.21895	2.529888883	0.373489614	6.773652563	1.26E-11	1.84E-10	CEACAM5
ENSG00000169862	15.50909753	2.526830288	0.406297381	6.219164592	5.00E-10	5.86E-09	CTNND2
ENSG00000266010	16.75965614	2.525113184	0.25546456	9.884397195	4.87E-23	2.67E-21	GATA6-AS1
ENSG00000177354	0.726307876	2.523513751	0.753307852	3.349910324	0.000808377	0.002849464	C10orf71
ENSG00000204962	1.579448745	2.52157395	0.438430599	5.751363966	8.85E-09	8.53E-08	PCDHA8
ENSG00000214919	1.381371809	2.518698911	0.387439069	6.50089036	7.98E-11	1.05E-09	NA
ENSG00000272027	0.354893731	2.515354738	0.588702848	4.272706928	1.93E-05	9.97E-05	NA
ENSG00000198643	857.8916576	2.514467963	0.388101499	6.478892689	9.24E-11	1.20E-09	FAM3D
ENSG00000120262	126.3791423	2.513464431	0.23162298	10.85153309	1.96E-27	1.60E-25	CCDC170
ENSG00000272774	0.411545565	2.51304543	0.686509103	3.66061487	0.000251611	0.001002051	NA
ENSG00000185105	4.332015288	2.512361783	0.286869863	8.757844967	1.99E-18	6.62E-17	MYADML2
ENSG00000244699	9.925041175	2.512134388	0.473722027	5.302971458	1.14E-07	8.98E-07	NA
ENSG00000257408	0.434658216	2.511554568	0.53119037	4.72816284	2.27E-06	1.41E-05	NA
ENSG00000204950	137.0332601	2.510347549	0.292449327	8.583871877	9.17E-18	2.84E-16	LRRC10B
ENSG00000214274	508.13368	2.508067285	0.176172975	14.23639057	5.45E-46	1.71E-43	ANG
ENSG00000116299	3509.415002	2.50622325	0.359906627	6.963537374	3.32E-12	5.28E-11	ELAPOR1
ENSG00000138449	4669.718061	2.502144828	0.214989153	11.63847007	2.63E-31	3.04E-29	SLC40A1
ENSG00000186198	24.20051736	2.496382369	0.321316831	7.769223782	7.90E-15	1.71E-13	SLC51B
ENSG00000183535	1.713521075	2.494345587	0.307545944	8.110481176	5.04E-16	1.28E-14	COL18A1-AS1
ENSG00000197826	5.962292094	2.490475107	0.454621693	5.478126421	4.30E-08	3.65E-07	CFAP299
ENSG00000241832	0.328386275	2.488379876	0.650351764	3.826206083	0.000130133	0.000555267	CECR3
ENSG00000261617	1.693039879	2.486899731	0.419539501	5.927689109	3.07E-09	3.17E-08	LINC02177
ENSG00000235830	1.092105953	2.486839687	0.355128009	7.002657141	2.51E-12	4.06E-11	SRGAP3-AS4
ENSG00000134216	1.045366863	2.486699993	0.649293333	3.82985604	0.000128218	0.000548289	CHIA
ENSG00000235142	24.21239407	2.484589394	0.371923419	6.680378997	2.38E-11	3.37E-10	LINC02532
ENSG00000258913	1.749326297	2.482545975	0.493564081	5.029835172	4.91E-07	3.45E-06	LINC02691
ENSG00000207497	0.534364473	2.478863157	0.596728867	4.15408621	3.27E-05	0.000160735	NA
ENSG00000233338	7.025592317	2.477140622	0.514879204	4.811110263	1.50E-06	9.66E-06	TLR8-AS1
ENSG00000248238	4.67828481	2.4766215	0.625884856	3.956992211	7.59E-05	0.000343256	NA
ENSG00000229900	0.572649796	2.475964444	0.520914335	4.753112508	2.00E-06	1.26E-05	NA
ENSG00000260704	36.31208269	2.473427429	0.357511991	6.918446079	4.57E-12	7.11E-11	LINC00543
ENSG00000231069	1.471609198	2.472367727	0.635328038	3.891482161	9.96E-05	0.000437613	NA
ENSG00000233936	32.08102294	2.470513756	0.558507284	4.423422622	9.71E-06	5.32E-05	NA
ENSG00000269793	2.737954294	2.467905599	0.332847396	7.414525773	1.22E-13	2.32E-12	NA
ENSG00000227338	0.37560937	2.467702459	0.831196183	2.968856821	0.002989098	0.009017002	NA
ENSG00000178538	242.0355605	2.467285629	0.45598187	5.410929224	6.27E-08	5.17E-07	CA8
ENSG00000104112	11.84412247	2.466432075	0.380119372	6.488572433	8.67E-11	1.13E-09	SCG3
ENSG00000196364	2.278896852	2.46596944	0.523545511	4.710133866	2.48E-06	1.52E-05	PRSS29P
ENSG00000254528	15.19564752	2.462459385	0.303012248	8.126600162	4.41E-16	1.13E-14	NA
ENSG00000258962	1.277589495	2.461890143	0.406716917	6.053080257	1.42E-09	1.54E-08	LOC100128939
ENSG00000235077	3.63344374	2.461379841	0.291337061	8.448564133	2.95E-17	8.65E-16	NA
ENSG00000133665	65.08039616	2.459741477	0.347461089	7.079185424	1.45E-12	2.41E-11	DYDC2
ENSG00000251169	44.10350425	2.457284952	0.397936467	6.175068531	6.61E-10	7.59E-09	LINC01843
ENSG00000153930	36.4076818	2.455365095	0.375204619	6.544069485	5.99E-11	8.02E-10	ANKFN1
ENSG00000062524	176.1569955	2.455187031	0.282374673	8.694784844	3.47E-18	1.13E-16	LTK
ENSG00000259056	1.065907803	2.454672847	0.389351811	6.304511188	2.89E-10	3.51E-09	DUXAP1
ENSG00000233101	223.4987287	2.451423383	0.325248992	7.537066809	4.81E-14	9.57E-13	HOXB-AS3
ENSG00000113249	7.107471433	2.451369704	0.358107924	6.845337779	7.63E-12	1.15E-10	HAVCR1
ENSG00000275358	1.032177823	2.45031663	0.434090142	5.64471844	1.65E-08	1.52E-07	NA
ENSG00000237061	2.187027169	2.450189613	0.518487444	4.725648889	2.29E-06	1.43E-05	NA
ENSG00000170214	21.08937865	2.44875435	0.329338853	7.43536429	1.04E-13	2.00E-12	ADRA1B
ENSG00000241532	1.010652879	2.448600683	0.434137379	5.640151717	1.70E-08	1.56E-07	NA
ENSG00000135744	184.8036874	2.446245501	0.332066024	7.366744324	1.75E-13	3.25E-12	AGT
ENSG00000275395	8980.661029	2.445678372	0.344530054	7.098592252	1.26E-12	2.11E-11	FCGBP
ENSG00000173080	7.972357896	2.445556457	0.340572739	7.180716994	6.93E-13	1.20E-11	RXFP4
ENSG00000254872	42.3441416	2.440806256	0.386437748	6.31616934	2.68E-10	3.27E-09	LINC02688
ENSG00000248801	13.65793232	2.439894832	0.683522991	3.569587074	0.000357544	0.001376465	C8orf34-AS1
ENSG00000272514	8.764006006	2.439256299	0.330578189	7.378757519	1.60E-13	2.99E-12	CFAP206
ENSG00000275431	0.736341894	2.434906939	0.395355316	6.158781336	7.33E-10	8.34E-09	NA
ENSG00000223813	36.60149658	2.433634769	0.314050722	7.749177425	9.25E-15	1.99E-13	NA
ENSG00000255689	0.527181098	2.433531065	0.814432024	2.988010041	0.002808003	0.008536426	NA
ENSG00000164089	8.425918188	2.433174464	0.524984873	4.634751571	3.57E-06	2.13E-05	ETNPPL
ENSG00000185250	138.8498067	2.432671647	0.212363204	11.45524084	2.21E-30	2.34E-28	PPIL6
ENSG00000163618	47.28533448	2.432594396	0.266877985	9.115005855	7.87E-20	3.02E-18	CADPS
ENSG00000225156	3.696782845	2.432357294	0.554334614	4.387886361	1.14E-05	6.18E-05	NA
ENSG00000163046	0.815150564	2.431807328	0.59714049	4.072420762	4.65E-05	0.000220817	ANKRD30BL
ENSG00000264012	1.405288636	2.428383341	0.354319013	6.853663661	7.20E-12	1.09E-10	NA
ENSG00000230596	2.026626645	2.427646919	0.394221467	6.158078956	7.36E-10	8.37E-09	GPAA1P2
ENSG00000153002	28.88359907	2.427165538	0.52098839	4.658770879	3.18E-06	1.92E-05	CPB1
ENSG00000166268	27.01044768	2.425135638	0.31788109	7.629065436	2.36E-14	4.85E-13	MYRFL
ENSG00000157087	37.93202129	2.420992588	0.328031901	7.380357152	1.58E-13	2.96E-12	ATP2B2
ENSG00000250115	1.058214336	2.420028425	0.443953832	5.451081287	5.01E-08	4.21E-07	NA
ENSG00000224739	7.417307827	2.418973161	0.460133856	5.257107534	1.46E-07	1.13E-06	NA
ENSG00000279484	5.323547925	2.417181068	0.318637551	7.585989348	3.30E-14	6.66E-13	NA
ENSG00000076864	1494.01459	2.415937564	0.218297782	11.06716498	1.81E-28	1.59E-26	RAP1GAP
ENSG00000137098	75.87167685	2.415090926	0.194184064	12.43712217	1.64E-35	2.48E-33	SPAG8
ENSG00000197320	3.81889446	2.414569735	0.541720456	4.457224585	8.30E-06	4.60E-05	LOC340268
ENSG00000172771	63.76279538	2.413339264	0.247996222	9.731354944	2.22E-22	1.13E-20	EFCAB12
ENSG00000229782	2.160661645	2.413239076	0.301210349	8.011806648	1.13E-15	2.74E-14	NA
ENSG00000198173	0.530029504	2.410857104	0.587889508	4.100867715	4.12E-05	0.000197791	FAM47C
ENSG00000225385	5.209680391	2.410259339	0.33796207	7.131745105	9.91E-13	1.68E-11	NA
ENSG00000135702	3.883920729	2.410249982	0.289341236	8.330129568	8.08E-17	2.25E-15	CHST5
ENSG00000257017	320.1966301	2.409581028	0.452257383	5.327897606	9.94E-08	7.90E-07	HP
ENSG00000124490	7.24281124	2.408156473	0.712059372	3.381960226	0.000719706	0.002571606	CRISP2
ENSG00000154162	50.9092376	2.406832516	0.535143094	4.497549423	6.87E-06	3.89E-05	CDH12
ENSG00000151655	25.50558804	2.406596285	0.267818719	8.985915161	2.57E-19	9.25E-18	ITIH2
ENSG00000278991	10.40720729	2.402594351	0.203406825	11.81176863	3.39E-32	4.08E-30	NA
ENSG00000188596	81.96241023	2.402242672	0.22562067	10.64726327	1.80E-26	1.31E-24	CFAP54
ENSG00000232044	0.689235871	2.401125321	0.52607732	4.564206115	5.01E-06	2.91E-05	NA
ENSG00000227121	26.11856364	2.400876573	0.782067958	3.069907863	0.002141248	0.006735211	NA
ENSG00000149599	68.51699933	2.398338905	0.271042078	8.848585154	8.86E-19	3.05E-17	DUSP15
ENSG00000176532	927.0870852	2.396852571	0.302765689	7.916526416	2.44E-15	5.67E-14	PRR15
ENSG00000148483	19.38928736	2.392487888	0.231085819	10.35324409	4.05E-25	2.64E-23	TMEM236
ENSG00000231226	20.62781247	2.391553896	0.253689192	9.427102031	4.22E-21	1.84E-19	TRIM31-AS1
ENSG00000278957	1.152436472	2.389044235	0.529912511	4.508374842	6.53E-06	3.72E-05	NA
ENSG00000204361	1.539087434	2.3887295	0.431122135	5.540725714	3.01E-08	2.64E-07	NXPE2
ENSG00000151704	8.535817045	2.388505909	0.293050405	8.150495172	3.62E-16	9.35E-15	KCNJ1
ENSG00000259916	0.724827646	2.385478381	0.544644347	4.379882751	1.19E-05	6.39E-05	LOC100509620
ENSG00000276644	312.6194439	2.384935023	0.29825221	7.996369994	1.28E-15	3.08E-14	DACH1
ENSG00000164651	59.83733258	2.384597879	0.45306603	5.263245797	1.42E-07	1.09E-06	SP8
ENSG00000264175	5.493572521	2.384536159	0.366837476	6.500252327	8.02E-11	1.05E-09	MIR3189
ENSG00000101134	50.88549983	2.384301973	0.289607926	8.232861588	1.83E-16	4.90E-15	DOK5
ENSG00000144481	24.58485854	2.383760734	0.368542303	6.468079	9.93E-11	1.29E-09	TRPM8
ENSG00000060709	168.4745712	2.383452572	0.373082689	6.388537019	1.67E-10	2.10E-09	RIMBP2
ENSG00000185863	2.902026735	2.383404093	0.429165311	5.55358048	2.80E-08	2.46E-07	TMEM210
ENSG00000224717	4.210839438	2.38325507	0.338900517	7.032314646	2.03E-12	3.31E-11	LEMD1-DT
ENSG00000188176	70.44186034	2.382502216	0.377729483	6.30742985	2.84E-10	3.44E-09	SMTNL2
ENSG00000269621	0.982557152	2.382256185	0.425576266	5.597718613	2.17E-08	1.95E-07	NA
ENSG00000251008	5.410199704	2.381552429	0.35404001	6.726788948	1.73E-11	2.49E-10	ORAOV1P1
ENSG00000170011	86.33278958	2.377899081	0.3064714	7.758959177	8.56E-15	1.85E-13	MYRIP
ENSG00000178826	434.3100758	2.375606444	0.331542369	7.165317827	7.76E-13	1.33E-11	TMEM139
ENSG00000196188	1218.102526	2.374405424	0.50568312	4.695441333	2.66E-06	1.62E-05	CTSE
ENSG00000258647	18.43623533	2.373088529	0.443082683	5.355859345	8.52E-08	6.86E-07	NA
ENSG00000204961	1.889587136	2.372778298	0.333291198	7.1192348	1.09E-12	1.83E-11	PCDHA9
ENSG00000168539	16.24031375	2.372613367	0.442194521	5.365542203	8.07E-08	6.53E-07	CHRM1
ENSG00000243384	1.220281798	2.371359594	0.385509164	6.151240521	7.69E-10	8.71E-09	NA
ENSG00000111249	24.73705524	2.37121572	0.335894869	7.059398466	1.67E-12	2.75E-11	CUX2
ENSG00000224958	3.356764252	2.369301926	0.452056054	5.241168442	1.60E-07	1.22E-06	PGM5-AS1
ENSG00000233930	31.35058428	2.360696207	0.271828919	8.684492501	3.80E-18	1.24E-16	KRTAP5-AS1
ENSG00000249621	0.550889333	2.35945746	0.547231446	4.311626237	1.62E-05	8.50E-05	NA
ENSG00000257987	1.425853517	2.358947867	0.333310827	7.077321445	1.47E-12	2.44E-11	TEX49
ENSG00000277531	1.114898791	2.358385463	0.397430427	5.934083809	2.95E-09	3.06E-08	NA
ENSG00000259439	153.7650448	2.357417904	0.467760447	5.03979744	4.66E-07	3.29E-06	LINC01833
ENSG00000173698	181.613919	2.356844791	0.316318344	7.45086345	9.27E-14	1.78E-12	ADGRG2
ENSG00000185002	1.24033801	2.356495001	0.513197571	4.591789074	4.39E-06	2.58E-05	RFX6
ENSG00000253525	9.43628042	2.354869054	0.475094523	4.95663271	7.17E-07	4.89E-06	NA
ENSG00000234484	0.917183522	2.352821028	0.38729311	6.075039728	1.24E-09	1.36E-08	NA
ENSG00000103056	453.4234328	2.350585746	0.205938764	11.41400334	3.56E-30	3.65E-28	SMPD3
ENSG00000248515	10.41791266	2.350056777	0.61182103	3.84108532	0.000122492	0.00052627	NA
ENSG00000234521	0.879097241	2.349617413	0.42272983	5.558201111	2.73E-08	2.40E-07	NA
ENSG00000157315	48.3303975	2.348874421	0.136897873	17.15785911	5.49E-66	5.81E-63	TMED6
ENSG00000275025	2.205348315	2.346748585	0.247506542	9.481561847	2.51E-21	1.13E-19	NA
ENSG00000160183	1558.612484	2.34570142	0.306286851	7.658511673	1.88E-14	3.89E-13	TMPRSS3
ENSG00000152785	384.5350955	2.343944218	0.433815145	5.403094489	6.55E-08	5.39E-07	BMP3
ENSG00000162753	3.940407399	2.343407781	0.418191384	5.603673028	2.10E-08	1.89E-07	SLC9C2
ENSG00000263574	0.67851345	2.342587206	0.699634028	3.348303705	0.000813079	0.002863718	LOC100134391
ENSG00000187288	11.42824573	2.3425598	0.407466311	5.749088293	8.97E-09	8.64E-08	CIDEC
ENSG00000268812	15.35265819	2.340513317	0.27812111	8.415446474	3.91E-17	1.13E-15	LOC91370
ENSG00000251665	0.835219623	2.337194644	0.347098342	6.733522924	1.66E-11	2.39E-10	NA
ENSG00000268833	5.331984779	2.337023513	0.371282765	6.294457306	3.08E-10	3.73E-09	NA
ENSG00000077279	5.35095178	2.330445519	0.47002811	4.958098188	7.12E-07	4.86E-06	DCX
ENSG00000119888	12264.59724	2.328050573	0.204597751	11.37867137	5.34E-30	5.37E-28	EPCAM
ENSG00000177133	27.33036467	2.326720528	0.310155734	7.501781438	6.30E-14	1.23E-12	PRDM16-DT
ENSG00000183778	678.0828258	2.32628803	0.400142802	5.813644582	6.11E-09	6.03E-08	B3GALT5
ENSG00000226330	20.88121425	2.324475123	0.239844489	9.691592809	3.27E-22	1.63E-20	NA
ENSG00000234690	13.21657402	2.323412276	0.276183135	8.412578409	4.01E-17	1.16E-15	EPCAM-DT
ENSG00000172915	357.7466048	2.320996133	0.29154513	7.961018375	1.71E-15	4.03E-14	NBEA
ENSG00000166840	14.22004109	2.319902015	0.422703449	5.488249553	4.06E-08	3.47E-07	GLYATL1
ENSG00000187658	0.711550983	2.317658206	0.416380615	5.566201025	2.60E-08	2.31E-07	C5orf52
ENSG00000145864	51.58784732	2.317453261	0.476291997	4.865614533	1.14E-06	7.50E-06	GABRB2
ENSG00000109738	198.5998262	2.316804894	0.263507876	8.792165659	1.47E-18	4.96E-17	GLRB
ENSG00000234155	13.02203364	2.316105439	0.388464041	5.962213217	2.49E-09	2.60E-08	LINC02535
ENSG00000175544	139.16194	2.315991514	0.237610026	9.747027744	1.90E-22	9.77E-21	CABP4
ENSG00000171815	3.634299137	2.314221977	0.42284282	5.473007616	4.42E-08	3.75E-07	PCDHB1
ENSG00000187621	9.841394482	2.313114909	0.330224663	7.004670359	2.48E-12	4.01E-11	NA
ENSG00000258676	4.162958952	2.312426847	0.491966541	4.700374222	2.60E-06	1.59E-05	NA
ENSG00000145491	30.23023844	2.310839018	0.315585332	7.322390441	2.44E-13	4.45E-12	ROPN1L
ENSG00000105519	2878.734607	2.309444931	0.25355894	9.108118749	8.38E-20	3.21E-18	CAPS
ENSG00000095539	392.2350163	2.30770267	0.221754525	10.40656405	2.31E-25	1.56E-23	SEMA4G
ENSG00000278012	0.620851037	2.305998604	0.556558202	4.143319774	3.42E-05	0.000167766	NA
ENSG00000170959	27.08525067	2.305795062	0.297791882	7.742974878	9.71E-15	2.08E-13	DCDC1
ENSG00000225356	2.831072201	2.304817249	0.241038821	9.562016757	1.15E-21	5.39E-20	NA
ENSG00000254438	0.608523936	2.303288898	0.611069421	3.769275339	0.000163722	0.000681952	LINC02683
ENSG00000110195	957.8209011	2.298668752	0.464560777	4.948047417	7.50E-07	5.09E-06	FOLR1
ENSG00000205611	22.46079565	2.297276111	0.441712345	5.200841995	1.98E-07	1.49E-06	LOC107985433
ENSG00000108551	1506.383551	2.297004873	0.303911836	7.558129044	4.09E-14	8.17E-13	RASD1
ENSG00000108511	1143.897375	2.296891429	0.26552713	8.650307899	5.14E-18	1.65E-16	HOXB6
ENSG00000224649	2.620805189	2.29569401	0.317823207	7.223179297	5.08E-13	8.93E-12	NA
ENSG00000172318	15.24773975	2.294384614	0.432816287	5.301058867	1.15E-07	9.06E-07	B3GALT1
ENSG00000140297	1599.988418	2.294273717	0.375421384	6.111196157	9.89E-10	1.10E-08	GCNT3
ENSG00000185942	3.202112056	2.294215209	0.531970558	4.312673274	1.61E-05	8.46E-05	NKAIN3
ENSG00000128298	997.4228156	2.294146143	0.23025214	9.963625736	2.20E-23	1.24E-21	BAIAP2L2
ENSG00000154556	1105.824954	2.292276208	0.265131679	8.645802785	5.34E-18	1.71E-16	SORBS2
ENSG00000101203	7.667984492	2.2921399	0.355843011	6.441435776	1.18E-10	1.52E-09	COL20A1
ENSG00000074370	3363.488785	2.290927396	0.210064258	10.90584099	1.08E-27	9.07E-26	ATP2A3
ENSG00000153904	2154.439723	2.289235226	0.204165694	11.21263414	3.54E-29	3.34E-27	DDAH1
ENSG00000173890	996.7351889	2.288962191	0.20246888	11.30525438	1.24E-29	1.20E-27	GPR160
ENSG00000130700	28.43207765	2.288658111	0.537015222	4.261812365	2.03E-05	0.000104297	GATA5
ENSG00000187867	318.9934354	2.288144142	0.357411718	6.401984117	1.53E-10	1.93E-09	PALM3
ENSG00000144485	1993.188922	2.28707804	0.257274155	8.889653297	6.13E-19	2.16E-17	HES6
ENSG00000261514	3.414734601	2.285761677	0.481632864	4.745859031	2.08E-06	1.30E-05	LINC01976
ENSG00000111110	838.6150162	2.283907878	0.253114139	9.02323311	1.83E-19	6.70E-18	PPM1H
ENSG00000128342	932.7280503	2.283864707	0.249787914	9.143215412	6.06E-20	2.35E-18	LIF
ENSG00000113361	470.8920186	2.282273929	0.299807151	7.612473289	2.69E-14	5.49E-13	CDH6
ENSG00000178125	4.80986039	2.28219541	0.359588489	6.346686496	2.20E-10	2.71E-09	PPP1R42
ENSG00000256757	1.532450928	2.281594307	0.402802572	5.664299247	1.48E-08	1.36E-07	NA
ENSG00000173930	87.0888587	2.277271112	0.386503439	5.891981496	3.82E-09	3.89E-08	SLCO4C1
ENSG00000115648	2889.741388	2.276115354	0.247143321	9.209698026	3.27E-20	1.30E-18	MLPH
ENSG00000254454	7.921121285	2.275836568	0.236775447	9.611792945	7.13E-22	3.41E-20	NA
ENSG00000112379	1507.051698	2.275087325	0.214257098	10.61849218	2.44E-26	1.76E-24	ARFGEF3
ENSG00000249388	5.583989559	2.271830334	0.303809049	7.477823124	7.56E-14	1.46E-12	NA
ENSG00000162951	26.55075723	2.271699022	0.620863127	3.658936929	0.000253264	0.001007066	LRRTM1
ENSG00000278794	0.914747602	2.269742005	0.329827324	6.881606952	5.92E-12	9.06E-11	NA
ENSG00000184925	129.8816399	2.266346718	0.249563546	9.081241036	1.07E-19	4.05E-18	LCN12
ENSG00000226900	1.403019989	2.265625274	0.465582556	4.866215981	1.14E-06	7.48E-06	NA
ENSG00000016490	1.294297617	2.26461427	0.505005627	4.484334723	7.31E-06	4.11E-05	CLCA1
ENSG00000108846	3125.744894	2.263843189	0.232232469	9.748176884	1.88E-22	9.67E-21	ABCC3
ENSG00000249158	16.86147704	2.262224143	0.545432004	4.147582328	3.36E-05	0.000164921	PCDHA11
ENSG00000130433	58.82819605	2.26205326	0.61274212	3.691688865	0.00022277	0.000900061	CACNG6
ENSG00000226869	1.106767529	2.259766296	0.530886832	4.256587581	2.08E-05	0.000106493	LHFPL3-AS1
ENSG00000255007	5.093132697	2.259286341	0.530565371	4.258261969	2.06E-05	0.000105814	NA
ENSG00000089472	593.8276551	2.258581992	0.250366456	9.021104624	1.86E-19	6.80E-18	HEPH
ENSG00000235023	5.679076206	2.25742455	0.332856324	6.781978861	1.19E-11	1.74E-10	NA
ENSG00000145198	60.80279524	2.255357269	0.275008687	8.201040105	2.38E-16	6.30E-15	VWA5B2
ENSG00000124602	196.1134726	2.255113205	0.202250168	11.15011784	7.15E-29	6.52E-27	UNC5CL
ENSG00000001561	614.5632956	2.254844238	0.240991209	9.356541459	8.24E-21	3.51E-19	ENPP4
ENSG00000233377	17.05244428	2.254511908	0.502714257	4.48467868	7.30E-06	4.11E-05	NA
ENSG00000255644	0.537928004	2.254478389	0.615151112	3.664918009	0.000247418	0.000987127	NA
ENSG00000199094	1.78363416	2.253996164	0.370291954	6.08707843	1.15E-09	1.27E-08	MIR30C2
ENSG00000162878	1847.045446	2.253783994	0.334624352	6.735265914	1.64E-11	2.36E-10	PKDCC
ENSG00000131730	56.58390149	2.253140787	0.219105524	10.28335912	8.38E-25	5.34E-23	CKMT2
ENSG00000136383	1613.251849	2.252971533	0.273697921	8.231598984	1.85E-16	4.95E-15	ALPK3
ENSG00000112299	730.6575452	2.252857992	0.333669584	6.751763116	1.46E-11	2.12E-10	VNN1
ENSG00000229028	5.104333885	2.25128772	0.535091811	4.207292423	2.58E-05	0.000129681	NA
ENSG00000231170	2.384871257	2.249595944	0.351348744	6.402743663	1.53E-10	1.92E-09	NA
ENSG00000280114	13.47049187	2.248426105	0.406650915	5.529130821	3.22E-08	2.80E-07	NA
ENSG00000205231	8.912828813	2.243952181	0.232152251	9.665864431	4.21E-22	2.06E-20	TTLL10-AS1
ENSG00000064787	780.9612136	2.243179624	0.306128364	7.327578508	2.34E-13	4.29E-12	BCAS1
ENSG00000179796	2.160616502	2.242101307	0.621126284	3.60973503	0.00030651	0.001196213	LRRC3B
ENSG00000258792	2.003446606	2.241447788	0.399041145	5.617084395	1.94E-08	1.76E-07	LOC105370616
ENSG00000105641	249.2804451	2.241273015	0.39222756	5.714216038	1.10E-08	1.04E-07	SLC5A5
ENSG00000137392	5.325583425	2.240414277	0.494316282	4.532349754	5.83E-06	3.35E-05	CLPS
ENSG00000236164	0.48461136	2.239489443	0.621132377	3.605494622	0.000311559	0.001213862	NA
ENSG00000216425	0.274303284	2.238252045	0.609399116	3.672883642	0.000239829	0.000960467	NA
ENSG00000266149	1.040135347	2.237155955	0.558090245	4.008591752	6.11E-05	0.000282437	LOC100192426
ENSG00000174899	23.25683811	2.236038001	0.419688462	5.327851976	9.94E-08	7.90E-07	SLC66A1L
ENSG00000274310	6.40502121	2.235687236	0.738980219	3.025368173	0.002483306	0.007664098	NA
ENSG00000207926	4.33385962	2.234177871	0.186702759	11.96649628	5.32E-33	6.66E-31	MIR135A1
ENSG00000225931	7.46681833	2.233471726	0.233323248	9.572435422	1.04E-21	4.90E-20	NA
ENSG00000228620	1.364417523	2.2329868	0.600936906	3.715842344	0.000202528	0.000825426	NA
ENSG00000204913	0.745885911	2.232143095	0.594656771	3.753666322	0.000174267	0.000720512	LRRC3C
ENSG00000189108	12.32126193	2.232025122	0.406829462	5.48639007	4.10E-08	3.50E-07	IL1RAPL2
ENSG00000166450	45.04425687	2.231654914	0.311887978	7.155309177	8.35E-13	1.43E-11	PRTG
ENSG00000226321	17.94360495	2.229565226	0.411959242	5.412101491	6.23E-08	5.15E-07	CROCC2
ENSG00000265485	3.387590828	2.229328532	0.309813051	7.195721826	6.21E-13	1.08E-11	LINC01915
ENSG00000162949	603.8775267	2.229281215	0.370532689	6.016422522	1.78E-09	1.90E-08	CAPN13
ENSG00000230525	0.993456406	2.228110763	0.581671447	3.830531437	0.000127867	0.000547025	LINC01799
ENSG00000175509	1.409360101	2.22730626	0.345325457	6.449875651	1.12E-10	1.44E-09	ACRP1
ENSG00000118271	16.71817602	2.226986877	0.663047689	3.358712975	0.000783064	0.002769954	TTR
ENSG00000213937	219.1643375	2.225979705	0.329981912	6.745762797	1.52E-11	2.20E-10	CLDN9
ENSG00000134538	7.631365417	2.225214928	0.651790389	3.414003894	0.000640157	0.002321234	SLCO1B1
ENSG00000170689	1056.515428	2.224449381	0.308601258	7.208166927	5.67E-13	9.93E-12	HOXB9
ENSG00000169989	20.61901636	2.222862607	0.205183499	10.83353494	2.39E-27	1.92E-25	TIGD4
ENSG00000177103	45.67584513	2.22202473	0.322947758	6.880446377	5.97E-12	9.13E-11	DSCAML1
ENSG00000237583	0.595153204	2.221252389	0.465408892	4.772690049	1.82E-06	1.15E-05	RPL34P8
ENSG00000158113	36.46423661	2.218586871	0.243665949	9.105034495	8.62E-20	3.30E-18	LRRC43
ENSG00000140527	40.05253555	2.218028826	0.2123927	10.44305584	1.58E-25	1.07E-23	WDR93
ENSG00000204978	1.461210983	2.217895636	0.330449448	6.711754699	1.92E-11	2.74E-10	ERICH4
ENSG00000234459	2.047533036	2.217744899	0.273980479	8.094536163	5.75E-16	1.44E-14	NA
ENSG00000233237	20.14956499	2.217569668	0.288212782	7.694210007	1.42E-14	2.98E-13	LINC00472
ENSG00000254864	1.712191862	2.217115693	0.27785918	7.979278178	1.47E-15	3.51E-14	NA
ENSG00000223382	4.356841863	2.216830786	0.3390907	6.53757472	6.25E-11	8.35E-10	LINC01778
ENSG00000270716	0.793956286	2.214633106	0.625650495	3.539728848	0.000400538	0.00152594	BNIP3P15
ENSG00000049089	2498.513903	2.214560334	0.23049183	9.607977587	7.40E-22	3.52E-20	COL9A2
ENSG00000155052	0.528472243	2.213569047	0.514023428	4.30635828	1.66E-05	8.68E-05	CNTNAP5
ENSG00000114204	22.29624873	2.213464146	0.513797228	4.308049997	1.65E-05	8.62E-05	SERPINI2
ENSG00000183196	1205.198941	2.213393725	0.290987275	7.606496627	2.82E-14	5.73E-13	CHST6
ENSG00000204969	6.958022224	2.211893966	0.411562231	5.374385207	7.68E-08	6.24E-07	PCDHA2
ENSG00000166391	115.9918378	2.211670809	0.440316672	5.022909535	5.09E-07	3.57E-06	MOGAT2
ENSG00000258774	3.544611692	2.209240408	0.350525682	6.302649203	2.93E-10	3.55E-09	NA
ENSG00000131781	180.9128863	2.208553159	0.19160242	11.52674983	9.67E-31	1.06E-28	FMO5
ENSG00000246016	1.490734797	2.208075236	0.424188319	5.205412632	1.94E-07	1.46E-06	NA
ENSG00000257271	0.798313769	2.207287218	0.564787878	3.908170314	9.30E-05	0.000411372	NA
ENSG00000124935	108.701049	2.207089513	0.639464471	3.451465425	0.000557551	0.002051317	SCGB1D2
ENSG00000196800	0.513586158	2.206953903	0.554392691	3.980849562	6.87E-05	0.000313781	SPINK14
ENSG00000260072	0.855975501	2.205656012	0.381715447	5.778272873	7.55E-09	7.34E-08	NA
ENSG00000147206	81.95059428	2.205504564	0.393111558	5.610378327	2.02E-08	1.83E-07	NXF3
ENSG00000146049	7.802290322	2.20523477	0.442825708	4.979915863	6.36E-07	4.38E-06	KAAG1
ENSG00000168350	1096.230511	2.204903738	0.285479352	7.723513868	1.13E-14	2.40E-13	DEGS2
ENSG00000053918	1187.538423	2.203461449	0.211991288	10.39411324	2.64E-25	1.77E-23	KCNQ1
ENSG00000168065	6.784905662	2.203400688	0.309970475	7.108421181	1.17E-12	1.97E-11	SLC22A11
ENSG00000162009	60.68201809	2.202631882	0.424235398	5.192003999	2.08E-07	1.56E-06	SSTR5
ENSG00000150175	1.916574605	2.200138497	0.440148641	4.998626128	5.77E-07	4.00E-06	NA
ENSG00000152292	18.10494825	2.198226759	0.274882338	7.99697344	1.28E-15	3.07E-14	SH2D6
ENSG00000231205	54.34877297	2.197390616	0.282485035	7.778785929	7.32E-15	1.59E-13	NA
ENSG00000255772	1.868564767	2.196014293	0.297246217	7.38786289	1.49E-13	2.81E-12	LINC01479
ENSG00000235029	11.54906159	2.195359716	0.278161533	7.892391485	2.96E-15	6.80E-14	MNX1-AS2
ENSG00000115290	177.3968983	2.194485917	0.272514418	8.052733261	8.10E-16	2.00E-14	GRB14
ENSG00000183960	34.29994364	2.192173721	0.40640678	5.394038263	6.89E-08	5.64E-07	KCNH8
ENSG00000261120	0.469909745	2.191736923	0.567033252	3.86527054	0.000110966	0.000481665	NA
ENSG00000242267	5.015244792	2.190941076	0.315821425	6.937278159	4.00E-12	6.30E-11	NA
ENSG00000182870	41.17663082	2.190298537	0.303122066	7.225797072	4.98E-13	8.78E-12	GALNT9
ENSG00000256232	9.312406671	2.189353478	0.402743799	5.436094818	5.45E-08	4.55E-07	LINC02387
ENSG00000226072	0.325711355	2.189282709	0.548565996	3.990919461	6.58E-05	0.000301806	NA
ENSG00000183733	1.085374314	2.188461285	0.469204343	4.664196563	3.10E-06	1.87E-05	FIGLA
ENSG00000253208	0.463233924	2.188437795	0.410150242	5.335697922	9.52E-08	7.60E-07	PSME2P5
ENSG00000273819	4.272141389	2.187645979	0.291198925	7.512548264	5.80E-14	1.14E-12	ENPP7P7
ENSG00000092607	140.5014513	2.187372818	0.3038043	7.199940295	6.02E-13	1.05E-11	TBX15
ENSG00000250381	2.444290582	2.186823552	0.327584711	6.675597127	2.46E-11	3.47E-10	NA
ENSG00000106025	698.3313421	2.186807014	0.234064929	9.342736759	9.39E-21	3.97E-19	TSPAN12
ENSG00000224272	108.4573048	2.184587285	0.305176458	7.158439739	8.16E-13	1.40E-11	NA
ENSG00000089101	26.03888589	2.18341003	0.223327827	9.776703878	1.42E-22	7.39E-21	CFAP61
ENSG00000235931	0.896676075	2.183165759	0.442051638	4.938712072	7.86E-07	5.32E-06	LINC01553
ENSG00000232862	5.939083788	2.183005203	0.254365251	8.582167536	9.31E-18	2.88E-16	NA
ENSG00000231252	1.90748493	2.18219386	0.473720433	4.606501443	4.10E-06	2.42E-05	LOC101926964
ENSG00000009694	17.91522932	2.182125426	0.315854296	6.908645697	4.89E-12	7.58E-11	TENM1
ENSG00000136842	327.9047797	2.181150307	0.259855678	8.393698852	4.71E-17	1.35E-15	TMOD1
ENSG00000200252	0.251274483	2.180318181	0.715481415	3.047344255	0.002308731	0.007195595	NA
ENSG00000256982	7.299130275	2.179826958	0.326926672	6.667632669	2.60E-11	3.66E-10	NA
ENSG00000188770	0.993214914	2.179246642	0.594306719	3.666871956	0.000245536	0.000980416	OPTC
ENSG00000132464	4.19802861	2.176848774	0.319829968	6.806268924	1.00E-11	1.49E-10	ENAM
ENSG00000082175	508.5070716	2.1762256	0.350632256	6.206575582	5.42E-10	6.32E-09	PGR
ENSG00000138308	1.035297193	2.175878551	0.406594772	5.351467108	8.72E-08	7.02E-07	PLA2G12B
ENSG00000252339	0.267714107	2.175646415	0.548335365	3.967729522	7.26E-05	0.000329334	RNU6-1061P
ENSG00000101222	61.32905112	2.175062356	0.29838936	7.28934288	3.11E-13	5.63E-12	SPEF1
ENSG00000066032	5.061406653	2.174544213	0.436170923	4.985532275	6.18E-07	4.26E-06	CTNNA2
ENSG00000186231	18.24301686	2.173393467	0.250422136	8.678919123	4.00E-18	1.30E-16	KLHL32
ENSG00000109794	271.8153246	2.172828927	0.236371775	9.192421248	3.84E-20	1.52E-18	FAM149A
ENSG00000267015	4.465777805	2.172219835	0.637480158	3.407509722	0.000655586	0.002367541	NA
ENSG00000170500	176.291997	2.172023275	0.380046981	5.715144133	1.10E-08	1.04E-07	LONRF2
ENSG00000157890	38.26569975	2.171640075	0.247521642	8.773536165	1.73E-18	5.81E-17	MEGF11
ENSG00000162814	149.0636882	2.170317127	0.231607385	9.370673244	7.21E-21	3.09E-19	SPATA17
ENSG00000151364	389.0008699	2.169575076	0.215366868	10.07385722	7.21E-24	4.21E-22	KCTD14
ENSG00000235665	1.162453119	2.169275711	0.324472746	6.685540574	2.30E-11	3.26E-10	LINC00298
ENSG00000136014	62.24062215	2.168762955	0.299381014	7.244156621	4.35E-13	7.73E-12	USP44
ENSG00000169418	522.2104137	2.167578338	0.255264764	8.491490561	2.04E-17	6.06E-16	NPR1
ENSG00000091262	200.5821864	2.166861064	0.218269788	9.927443856	3.16E-23	1.76E-21	ABCC6
ENSG00000260139	8.496094497	2.165143966	0.33740751	6.416999917	1.39E-10	1.76E-09	CSPG4P13
ENSG00000147573	8.080437966	2.165043619	0.276101389	7.841480362	4.45E-15	9.96E-14	TRIM55
ENSG00000204965	8.751035762	2.164950986	0.399426561	5.420147773	5.95E-08	4.94E-07	PCDHA5
ENSG00000101958	1.962862754	2.163548396	0.338142191	6.398339086	1.57E-10	1.97E-09	GLRA2
ENSG00000184385	3.713672597	2.163206282	0.390306137	5.542332226	2.98E-08	2.61E-07	UMODL1-AS1
ENSG00000130045	76.88427275	2.159915837	0.269307535	8.020257724	1.06E-15	2.56E-14	NXNL2
ENSG00000142611	106.0009008	2.159736328	0.287594103	7.50966834	5.93E-14	1.16E-12	PRDM16
ENSG00000253591	2.442256302	2.157944824	0.630463454	3.422791298	0.000619816	0.002255202	KCNIP1-AS1
ENSG00000168427	69.9479627	2.157245009	0.251000542	8.594583078	8.36E-18	2.60E-16	KLHL30
ENSG00000227695	21.73239221	2.156435033	0.231787744	9.303490316	1.36E-20	5.65E-19	DNMBP-AS1
ENSG00000280707	0.29571465	2.15538014	0.69579288	3.097732389	0.001950074	0.006201588	HPAT5
ENSG00000166596	34.09641197	2.154123351	0.192982282	11.16228563	6.24E-29	5.72E-27	CFAP52
ENSG00000176595	256.2682935	2.151989758	0.243514823	8.837202308	9.81E-19	3.37E-17	KBTBD11
ENSG00000166578	197.1721753	2.151770014	0.185829663	11.57926014	5.25E-31	5.89E-29	IQCD
ENSG00000120075	524.6329305	2.151309798	0.262370054	8.199524924	2.41E-16	6.37E-15	HOXB5
ENSG00000113100	0.463610884	2.150269539	0.706411842	3.043931899	0.00233508	0.007271353	CDH9
ENSG00000173612	0.458441035	2.150133799	0.575211797	3.737986268	0.0001855	0.000762932	GPRC6A
ENSG00000262585	20.62828047	2.149215674	0.312904795	6.868592975	6.48E-12	9.86E-11	LINC01979
ENSG00000163827	60.95915733	2.14718187	0.286418693	7.496654101	6.55E-14	1.28E-12	LRRC2
ENSG00000181143	7841.220468	2.144317124	0.348787812	6.147913004	7.85E-10	8.88E-09	MUC16
ENSG00000227706	0.420743644	2.144158109	0.664587916	3.226297166	0.001254031	0.004199717	NA
ENSG00000256287	2.218530027	2.143604637	0.622639067	3.442772467	0.000575784	0.002111063	LINC02398
ENSG00000174898	2.932475663	2.143355301	0.308993894	6.936561999	4.02E-12	6.33E-11	CATSPERD
ENSG00000253368	1037.117122	2.142254623	0.236650855	9.0523849	1.40E-19	5.21E-18	TRNP1
ENSG00000228741	3.160267172	2.14034824	0.295292239	7.248237373	4.22E-13	7.51E-12	SPATA13
ENSG00000198003	64.30032043	2.139385664	0.23544966	9.08638249	1.02E-19	3.88E-18	CCDC151
ENSG00000253348	38.49832704	2.137975615	0.367757463	5.81354787	6.12E-09	6.03E-08	NA
ENSG00000085831	1389.971793	2.137941295	0.192886644	11.08392604	1.50E-28	1.33E-26	TTC39A
ENSG00000154274	595.8163002	2.13758965	0.249559646	8.565445918	1.08E-17	3.31E-16	C4orf19
ENSG00000249776	1.595072709	2.137511403	0.65035079	3.286705323	0.001013668	0.003484391	NA
ENSG00000153132	432.5366193	2.136937578	0.327677534	6.521465035	6.96E-11	9.23E-10	CLGN
ENSG00000274373	20.42410902	2.136009902	0.349878297	6.105008279	1.03E-09	1.14E-08	NA
ENSG00000140057	170.3182743	2.135991096	0.213871046	9.987285015	1.73E-23	9.90E-22	AK7
ENSG00000249295	0.493143947	2.135081636	0.426115934	5.010565121	5.43E-07	3.78E-06	LOC101928924
ENSG00000116176	8.916012441	2.13446606	0.30123321	7.085759436	1.38E-12	2.30E-11	TPSG1
ENSG00000264954	2.514738485	2.133754514	0.301780821	7.07054381	1.54E-12	2.55E-11	PRR29-AS1
ENSG00000103485	1045.40401	2.133667661	0.282067164	7.564395763	3.90E-14	7.81E-13	QPRT
ENSG00000264451	0.866491866	2.131497654	0.455282491	4.68170355	2.85E-06	1.73E-05	NA
ENSG00000253844	3.58144244	2.131271075	0.255889167	8.32888355	8.16E-17	2.27E-15	NA
ENSG00000167434	18.19879045	2.13030975	0.367499259	5.796772908	6.76E-09	6.61E-08	CA4
ENSG00000162989	5.468417113	2.128472345	0.366805734	5.802723758	6.52E-09	6.40E-08	KCNJ3
ENSG00000148948	37.69950275	2.126785043	0.33958654	6.262866137	3.78E-10	4.50E-09	LRRC4C
ENSG00000125931	24.47706802	2.126301429	0.19836932	10.71890262	8.30E-27	6.33E-25	CITED1
ENSG00000226644	37.25235445	2.12625112	0.35851017	5.930797221	3.01E-09	3.12E-08	NA
ENSG00000228705	12.66590075	2.124835498	0.400476701	5.305765583	1.12E-07	8.85E-07	LINC00659
ENSG00000183091	183.0433109	2.124730072	0.22305775	9.525470763	1.64E-21	7.53E-20	NEB
ENSG00000165807	80.17132616	2.123115084	0.215387541	9.85718612	6.38E-23	3.47E-21	PPP1R36
ENSG00000196352	13268.46282	2.119815683	0.218906386	9.683663054	3.54E-22	1.75E-20	CD55
ENSG00000259104	0.701916061	2.11970657	0.604275146	3.507849999	0.000451744	0.001700026	NA
ENSG00000255408	13.04513874	2.119457797	0.379521031	5.584559542	2.34E-08	2.10E-07	PCDHA3
ENSG00000104059	74.56063498	2.117921076	0.372943784	5.678928486	1.36E-08	1.26E-07	FAM189A1
ENSG00000280040	6.543494334	2.117562426	0.230072376	9.203896908	3.45E-20	1.37E-18	NA
ENSG00000266283	2.259480113	2.115598328	0.294842571	7.175348932	7.21E-13	1.24E-11	NA
ENSG00000233673	8.403248929	2.114884859	0.365431111	5.787369479	7.15E-09	6.97E-08	ANAPC1P1
ENSG00000234835	1.33651307	2.112655198	0.389883232	5.418687	6.00E-08	4.98E-07	NA
ENSG00000139055	319.275207	2.112280878	0.255916913	8.253776005	1.53E-16	4.14E-15	ERP27
ENSG00000248050	2.015591932	2.111785777	0.344859172	6.123617834	9.15E-10	1.02E-08	NA
ENSG00000249574	21.5346633	2.111610042	0.269848397	7.825171705	5.07E-15	1.13E-13	LOC442497
ENSG00000250742	327.8396906	2.111150665	0.270121222	7.815567579	5.47E-15	1.21E-13	LINC02381
ENSG00000253661	5.694482705	2.111017303	0.437746346	4.822466993	1.42E-06	9.16E-06	ZFHX4-AS1
ENSG00000258818	82.84123679	2.110989152	0.202875965	10.40531909	2.34E-25	1.58E-23	RNASE4
ENSG00000202522	1.236023826	2.10820061	0.266799353	7.901820537	2.75E-15	6.33E-14	NA
ENSG00000198570	4.603985963	2.107642165	0.39782922	5.29785662	1.17E-07	9.21E-07	RD3
ENSG00000186009	3.980935167	2.107559746	0.324053199	6.503746157	7.83E-11	1.03E-09	ATP4B
ENSG00000235495	0.957330547	2.104087656	0.592676016	3.550148137	0.000385014	0.001471807	NA
ENSG00000227509	0.666893924	2.103844618	0.447438785	4.70197195	2.58E-06	1.58E-05	NA
ENSG00000181085	652.6378288	2.103091245	0.246043662	8.547634318	1.26E-17	3.82E-16	MAPK15
ENSG00000002933	1753.150821	2.102690461	0.219471444	9.580701807	9.64E-22	4.53E-20	TMEM176A
ENSG00000241622	0.805606675	2.101162207	0.514908436	4.080652128	4.49E-05	0.000213819	NA
ENSG00000128536	123.1466946	2.10024431	0.195284855	10.75477311	5.63E-27	4.37E-25	CDHR3
ENSG00000157064	292.0556659	2.098040439	0.270345268	7.760596135	8.45E-15	1.83E-13	NMNAT2
ENSG00000197251	5.671212194	2.098031878	0.298894213	7.019312474	2.23E-12	3.63E-11	LINC00336
ENSG00000238213	1.455261324	2.096732812	0.369960547	5.667449761	1.45E-08	1.34E-07	TARDBPP2
ENSG00000267606	0.646856517	2.096271957	0.559013653	3.74994769	0.000176871	0.000730665	NA
ENSG00000197177	27.21551182	2.096007073	0.444989155	4.710243041	2.47E-06	1.52E-05	ADGRA1
ENSG00000269155	11.56463589	2.094385645	0.272014637	7.699532903	1.37E-14	2.87E-13	LOC441179
ENSG00000141431	42.85123348	2.094133705	0.339682537	6.164973105	7.05E-10	8.05E-09	ASXL3
ENSG00000227188	5.393750677	2.093610623	0.353361975	5.924832804	3.13E-09	3.22E-08	MGAT3-AS1
ENSG00000271763	1.071294067	2.089551272	0.359600713	5.810753981	6.22E-09	6.12E-08	NA
ENSG00000187021	0.77224548	2.088641953	0.502184389	4.159113662	3.19E-05	0.000157515	PNLIPRP1
ENSG00000107537	1209.431425	2.08773339	0.158846839	13.1430591	1.87E-39	3.71E-37	PHYH
ENSG00000148346	30785.35158	2.08770792	0.315117096	6.625181382	3.47E-11	4.80E-10	LCN2
ENSG00000235902	0.67521285	2.086479123	0.331908732	6.286303795	3.25E-10	3.91E-09	NA
ENSG00000278342	1.235102084	2.086077196	0.448846819	4.647637249	3.36E-06	2.01E-05	NA
ENSG00000050438	183.1817421	2.085803745	0.25855744	8.067080741	7.20E-16	1.79E-14	SLC4A8
ENSG00000141576	618.7976626	2.085594963	0.235353004	8.861560831	7.89E-19	2.75E-17	RNF157
ENSG00000249610	7.398672571	2.08456905	0.365587889	5.701964188	1.18E-08	1.11E-07	NA
ENSG00000239218	7.008436614	2.083446516	0.349643428	5.958775003	2.54E-09	2.65E-08	NA
ENSG00000132872	1.591993097	2.083064905	0.6509816	3.199882921	0.001374834	0.004556384	SYT4
ENSG00000016391	697.6360761	2.08267814	0.163828902	12.71251966	5.04E-37	8.47E-35	CHDH
ENSG00000270919	7.328942562	2.082085815	0.315716753	6.59479041	4.26E-11	5.82E-10	NA
ENSG00000257046	3.420454266	2.081955143	0.665214493	3.129750126	0.001749551	0.00563292	SLCO1B7
ENSG00000139737	183.4971071	2.081768814	0.266540331	7.810333269	5.70E-15	1.26E-13	SLAIN1
ENSG00000141469	84.76138107	2.078975992	0.313418003	6.633237318	3.28E-11	4.56E-10	SLC14A1
ENSG00000218357	15.69212954	2.078412864	0.482970575	4.303394391	1.68E-05	8.79E-05	LINC01644
ENSG00000255910	3.816366605	2.077487868	0.554299853	3.747949521	0.000178286	0.000735966	NA
ENSG00000252840	0.901955043	2.075632635	0.337289259	6.15386521	7.56E-10	8.58E-09	NA
ENSG00000225127	6.222499139	2.074407384	0.524896482	3.952031409	7.75E-05	0.000349604	LINC00237
ENSG00000178248	1.969009898	2.073972942	0.555641935	3.732570942	0.000189535	0.000778214	FAM230I
ENSG00000225417	0.460361456	2.072164004	0.6506151	3.184930697	0.001447887	0.004769564	NA
ENSG00000183248	440.0669022	2.072101217	0.308288684	6.721301571	1.80E-11	2.58E-10	PRR36
ENSG00000198478	1438.090463	2.071329802	0.2105743	9.836574578	7.83E-23	4.22E-21	SH3BGRL2
ENSG00000263612	21.02801489	2.070893646	0.529516523	3.910914118	9.19E-05	0.000407186	NA
ENSG00000265460	1.495509837	2.069901457	0.388403462	5.329255944	9.86E-08	7.85E-07	NA
ENSG00000128655	34.73376273	2.0683792	0.321969553	6.424145337	1.33E-10	1.69E-09	PDE11A
ENSG00000164675	31.0783881	2.068021094	0.215199127	9.609802439	7.27E-22	3.46E-20	IQUB
ENSG00000235597	1.271467717	2.065267243	0.420884813	4.90696547	9.25E-07	6.19E-06	LINC01102
ENSG00000261572	52.21155145	2.065087005	0.25220941	8.187985568	2.66E-16	6.95E-15	NA
ENSG00000249267	19.31623839	2.064831192	0.452349143	4.564684652	5.00E-06	2.91E-05	LINC00939
ENSG00000175920	300.5984532	2.064386303	0.284703043	7.251015934	4.14E-13	7.38E-12	DOK7
ENSG00000175928	610.0989485	2.063695655	0.38381055	5.376860158	7.58E-08	6.17E-07	LRRN1
ENSG00000075290	8.38652822	2.063336829	0.263025887	7.844615038	4.34E-15	9.76E-14	WNT8B
ENSG00000178882	258.9539462	2.062888983	0.368172141	5.603055616	2.11E-08	1.90E-07	RFLNA
ENSG00000106258	549.4926849	2.061564802	0.300900844	6.851309461	7.32E-12	1.10E-10	CYP3A5
ENSG00000257989	14.33710324	2.060009848	0.611951843	3.366294051	0.000761854	0.002703717	NA
ENSG00000255652	3.352155801	2.059145963	0.430567528	4.782399577	1.73E-06	1.10E-05	NA
ENSG00000183273	311.9083006	2.059060378	0.396322345	5.195418336	2.04E-07	1.53E-06	CCDC60
ENSG00000275443	0.46035433	2.058252301	0.441065126	4.666549633	3.06E-06	1.85E-05	NA
ENSG00000148357	343.3717974	2.057956273	0.288293673	7.13840248	9.44E-13	1.61E-11	HMCN2
ENSG00000112212	3.542320539	2.056653452	0.25912712	7.936851422	2.07E-15	4.85E-14	TSPO2
ENSG00000260776	2.30405132	2.055977894	0.367317658	5.59727487	2.18E-08	1.96E-07	NA
ENSG00000179913	2371.046662	2.054043079	0.260910235	7.872604457	3.47E-15	7.89E-14	B3GNT3
ENSG00000203435	2.37461495	2.05269391	0.256468626	8.003684266	1.21E-15	2.91E-14	NA
ENSG00000184617	0.786151797	2.052349122	0.459290898	4.46851686	7.88E-06	4.40E-05	NA
ENSG00000230741	1.287989079	2.05147406	0.476561338	4.304742946	1.67E-05	8.74E-05	NA
ENSG00000280924	7.784235411	2.048915237	0.249833264	8.201130629	2.38E-16	6.30E-15	LINC00628
ENSG00000253299	0.534426856	2.047661522	0.315490763	6.490400872	8.56E-11	1.12E-09	NA
ENSG00000184949	172.2236225	2.047531016	0.197233941	10.38123059	3.02E-25	2.02E-23	FAM227A
ENSG00000168237	377.4117824	2.047414283	0.151883435	13.48016844	2.05E-41	4.56E-39	GLYCTK
ENSG00000164185	45.41394786	2.045265023	0.282843929	7.231072741	4.79E-13	8.47E-12	ZNF474
ENSG00000223783	30.13263259	2.045247994	0.357884107	5.71483325	1.10E-08	1.04E-07	NA
ENSG00000077274	261.3146165	2.044687283	0.45554841	4.488408343	7.18E-06	4.04E-05	CAPN6
ENSG00000169427	16.18150509	2.043717035	0.336932139	6.065663673	1.31E-09	1.44E-08	KCNK9
ENSG00000160401	172.9085236	2.043598844	0.146780187	13.92285218	4.60E-44	1.20E-41	CFAP157
ENSG00000073849	5176.95701	2.043255928	0.226014046	9.040393579	1.56E-19	5.78E-18	ST6GAL1
ENSG00000268869	20.47747152	2.042529182	0.334254965	6.110692123	9.92E-10	1.10E-08	NA
ENSG00000179178	1182.173008	2.041871785	0.210275062	9.710479995	2.72E-22	1.36E-20	TMEM125
ENSG00000277010	1.942767948	2.040349638	0.391517084	5.211393636	1.87E-07	1.42E-06	NA
ENSG00000279013	2.781459062	2.040297836	0.395318629	5.161147706	2.45E-07	1.81E-06	NA
ENSG00000236114	3.530280278	2.04011733	0.245656194	8.304766508	1.00E-16	2.76E-15	LOC100130881
ENSG00000267385	8.41988399	2.039071817	0.308722103	6.604877978	3.98E-11	5.45E-10	NA
ENSG00000257258	0.863331914	2.039024081	0.401683262	5.076198776	3.85E-07	2.77E-06	NA
ENSG00000250073	32.67900581	2.03878049	0.179379744	11.36572302	6.19E-30	6.13E-28	LOC101929340
ENSG00000112796	468.1481608	2.038481655	0.300213797	6.790099849	1.12E-11	1.65E-10	ENPP5
ENSG00000279726	0.402149258	2.038144001	0.631790981	3.225978311	0.001255429	0.00420298	NA
ENSG00000108187	380.5307515	2.037071991	0.140456427	14.5032309	1.16E-47	4.04E-45	PBLD
ENSG00000175229	2.630411247	2.035358729	0.480365497	4.237104331	2.26E-05	0.000115084	GAL3ST3
ENSG00000268295	2.663646595	2.035294526	0.321120799	6.338096232	2.33E-10	2.86E-09	NA
ENSG00000261238	1.184695203	2.034798154	0.590281282	3.447166995	0.000566498	0.002081499	NA
ENSG00000162873	134.7480785	2.034366777	0.323057853	6.297221251	3.03E-10	3.67E-09	KLHDC8A
ENSG00000261192	11.40720579	2.031253228	0.355155731	5.719331136	1.07E-08	1.01E-07	RNF126P1
ENSG00000262488	3.731930332	2.030829371	0.277411605	7.320635959	2.47E-13	4.50E-12	NA
ENSG00000258752	5.354223682	2.030308202	0.303615979	6.687092711	2.28E-11	3.23E-10	NA
ENSG00000101470	137.5138936	2.028964821	0.293344863	6.916653668	4.62E-12	7.19E-11	TNNC2
ENSG00000102109	172.9489665	2.028557236	0.377675946	5.371158146	7.82E-08	6.35E-07	PCSK1N
ENSG00000215148	4.733663429	2.02826826	0.532419073	3.809533432	0.000139229	0.000589952	PRSS41
ENSG00000165626	450.0326694	2.0282639	0.25409601	7.982273699	1.44E-15	3.43E-14	BEND7
ENSG00000229167	15.53650025	2.027981525	0.203542048	9.96345247	2.20E-23	1.24E-21	NA
ENSG00000227388	22.69482168	2.027212862	0.248126433	8.170080216	3.08E-16	8.00E-15	NA
ENSG00000176009	0.677052378	2.0253464	0.469184162	4.316740771	1.58E-05	8.32E-05	ASCL3
ENSG00000212136	0.330581697	2.024407737	0.449458307	4.504105729	6.67E-06	3.78E-05	RNU6-696P
ENSG00000215452	6.714609143	2.022604282	0.463945929	4.35956898	1.30E-05	6.96E-05	NA
ENSG00000236431	10.37863078	2.022596498	0.214596556	9.425111639	4.30E-21	1.88E-19	NA
ENSG00000258742	0.290599567	2.022105198	0.668081084	3.026736197	0.002472096	0.007633709	NA
ENSG00000219073	1.291221968	2.021805655	0.441116115	4.583386524	4.58E-06	2.68E-05	CELA3B
ENSG00000263961	1428.335983	2.021792296	0.34072253	5.933837999	2.96E-09	3.07E-08	RHEX
ENSG00000239930	0.624206084	2.021730541	0.307934659	6.565453038	5.19E-11	7.00E-10	LOC101930094
ENSG00000213424	7.545465194	2.02079394	0.392851622	5.143911403	2.69E-07	1.98E-06	KRT222
ENSG00000180061	89.53084695	2.019370444	0.24526797	8.233323115	1.82E-16	4.89E-15	TMEM150B
ENSG00000275674	2.851220479	2.018373336	0.272846328	7.397472967	1.39E-13	2.62E-12	NA
ENSG00000128606	277.2052743	2.017572928	0.320873604	6.287749757	3.22E-10	3.88E-09	LRRC17
ENSG00000168634	1.037452529	2.017024199	0.320348555	6.296342426	3.05E-10	3.69E-09	WFDC13
ENSG00000151023	97.91851544	2.015636384	0.245166701	8.221493282	2.01E-16	5.36E-15	ENKUR
ENSG00000229847	479.913764	2.015561108	0.351983716	5.726290785	1.03E-08	9.77E-08	EMX2OS
ENSG00000152467	5.005777676	2.015538124	0.397766871	5.067134223	4.04E-07	2.89E-06	ZSCAN1
ENSG00000129244	75.53243336	2.013554432	0.243456234	8.27070393	1.33E-16	3.63E-15	ATP1B2
ENSG00000183346	19.32921585	2.012312537	0.319992624	6.288621634	3.20E-10	3.86E-09	CABCOCO1
ENSG00000258474	8.369812226	2.011000178	0.443008675	4.539414896	5.64E-06	3.25E-05	LINC02313
ENSG00000230156	2.69293721	2.009404185	0.417186112	4.816565386	1.46E-06	9.42E-06	LINC00443
ENSG00000120068	628.2124461	2.007692781	0.330367167	6.077155902	1.22E-09	1.34E-08	HOXB8
ENSG00000196353	21.00983641	2.006197388	0.421938919	4.754710455	1.99E-06	1.25E-05	CPNE4
ENSG00000107249	545.511754	2.004460248	0.233764288	8.574706888	9.93E-18	3.06E-16	GLIS3
ENSG00000253674	0.717166939	2.004078624	0.48959666	4.093325763	4.25E-05	0.00020359	IGHVII-78-1
ENSG00000186148	3.509183306	2.003743264	0.450597967	4.446853762	8.71E-06	4.82E-05	LOC440895
ENSG00000267592	0.503780028	2.003353307	0.38229749	5.240299397	1.60E-07	1.23E-06	NA
ENSG00000250290	0.945439584	2.000881381	0.333797657	5.994294258	2.04E-09	2.16E-08	NA
ENSG00000279289	3.779004174	2.000719494	0.290010478	6.898783476	5.24E-12	8.08E-11	NA
ENSG00000271065	0.408625729	2.000705954	0.432255799	4.628523102	3.68E-06	2.19E-05	NA
ENSG00000124249	205.9829872	2.000265437	0.277400394	7.210751979	5.56E-13	9.75E-12	KCNK15
ENSG00000069018	0.575421436	2.000260223	0.610278203	3.277620294	0.001046861	0.003584024	TRPC7
ENSG00000135443	4.989971557	-2.000403596	0.366900143	-5.452174485	4.98E-08	4.19E-07	KRT85
ENSG00000164619	55.36647228	-2.001136017	0.348579429	-5.740832211	9.42E-09	9.03E-08	BMPER
ENSG00000268628	104.3021362	-2.001602019	0.293040738	-6.830456515	8.46E-12	1.27E-10	NA
ENSG00000239498	1.38334032	-2.001714207	0.413294625	-4.84331053	1.28E-06	8.33E-06	NA
ENSG00000278948	319.8154262	-2.003420311	0.147105237	-13.61895978	3.09E-42	7.21E-40	NA
ENSG00000175785	920.7242674	-2.005118349	0.273234123	-7.338462447	2.16E-13	3.97E-12	PRIMA1
ENSG00000172061	307.9959451	-2.007548297	0.328922471	-6.103408784	1.04E-09	1.15E-08	LRRC15
ENSG00000110375	160.0159042	-2.012155882	0.328842204	-6.1189101	9.42E-10	1.05E-08	UPK2
ENSG00000279806	620.3865005	-2.012625073	0.235056384	-8.562307655	1.11E-17	3.39E-16	NA
ENSG00000185070	617.4074001	-2.013644545	0.300528513	-6.700344426	2.08E-11	2.96E-10	FLRT2
ENSG00000198178	3.635785245	-2.014328131	0.385751947	-5.221822328	1.77E-07	1.35E-06	CLEC4C
ENSG00000117595	21367.94954	-2.015164583	0.145274532	-13.87142372	9.44E-44	2.42E-41	IRF6
ENSG00000187758	4.213458284	-2.016973944	0.380005843	-5.307744559	1.11E-07	8.77E-07	ADH1A
ENSG00000238755	13.02503291	-2.020022173	0.327848104	-6.161457539	7.21E-10	8.21E-09	NA
ENSG00000250509	14.17137482	-2.022634078	0.383922066	-5.268345477	1.38E-07	1.07E-06	NA
ENSG00000240764	20.88245523	-2.023507315	0.337356854	-5.998121256	2.00E-09	2.11E-08	PCDHGC5
ENSG00000169006	6.571209626	-2.025443285	0.503729981	-4.020890874	5.80E-05	0.00026955	NTSR2
ENSG00000273644	0.805748402	-2.028488198	0.541800822	-3.743974014	0.000181132	0.0007463	NA
ENSG00000183571	14.95380117	-2.028799587	0.331349471	-6.122839376	9.19E-10	1.03E-08	PGPEP1L
ENSG00000260047	3.478172858	-2.032254341	0.384577951	-5.284375602	1.26E-07	9.84E-07	NA
ENSG00000163064	237.8203089	-2.032358946	0.432801477	-4.695822575	2.66E-06	1.62E-05	EN1
ENSG00000224940	161.2408608	-2.033818727	0.282308968	-7.204229973	5.84E-13	1.02E-11	PRRT4
ENSG00000140254	2528.14261	-2.035556989	0.217439635	-9.361480894	7.86E-21	3.36E-19	DUOXA1
ENSG00000230115	0.894169414	-2.036758266	0.463365045	-4.395580302	1.10E-05	5.99E-05	TPRG1-AS2
ENSG00000204176	26.53629534	-2.03824019	0.241948773	-8.424263403	3.63E-17	1.05E-15	SYT15
ENSG00000163631	46.72970265	-2.042902883	0.439360821	-4.649715649	3.32E-06	1.99E-05	ALB
ENSG00000230817	0.778073086	-2.044250122	0.453326842	-4.509439841	6.50E-06	3.70E-05	LINC01362
ENSG00000258018	0.704695016	-2.045240847	0.565749236	-3.615101388	0.00030023	0.001174278	NA
ENSG00000211950	562.6258614	-2.050096855	0.34898543	-5.874448274	4.24E-09	4.30E-08	IGHV1-24
ENSG00000163347	27765.8083	-2.050429519	0.239548498	-8.559559071	1.13E-17	3.46E-16	CLDN1
ENSG00000222017	16.8500108	-2.050847248	0.259360128	-7.907334334	2.63E-15	6.06E-14	NA
ENSG00000203616	3.011415084	-2.05107298	0.405713889	-5.055466516	4.29E-07	3.05E-06	NA
ENSG00000251893	2.922619796	-2.052924822	0.446953069	-4.593155216	4.37E-06	2.57E-05	NA
ENSG00000248991	0.93819924	-2.05315619	0.503571685	-4.077187524	4.56E-05	0.000216787	NA
ENSG00000258077	14.73722512	-2.053344467	0.366818651	-5.597710103	2.17E-08	1.95E-07	NA
ENSG00000089116	70.62156374	-2.053512023	0.387215781	-5.303275645	1.14E-07	8.97E-07	LHX5
ENSG00000262902	277.7268488	-2.055572939	0.33859388	-6.070909896	1.27E-09	1.39E-08	MTCO1P40
ENSG00000165887	45.60909157	-2.055700893	0.27802718	-7.393884631	1.43E-13	2.69E-12	ANKRD2
ENSG00000129151	296.7165003	-2.055834106	0.31731821	-6.47877758	9.25E-11	1.20E-09	BBOX1
ENSG00000170925	1.215631755	-2.056004415	0.556481755	-3.694648382	0.000220191	0.000890745	TEX13B
ENSG00000254027	39.58849902	-2.057568403	0.220251059	-9.341922859	9.46E-21	3.99E-19	NA
ENSG00000172817	203.4443656	-2.061763128	0.247094628	-8.344022465	7.18E-17	2.01E-15	CYP7B1
ENSG00000214513	1.609860856	-2.062107691	0.539419091	-3.822830382	0.000131929	0.000562376	NOTO
ENSG00000227938	1.062684747	-2.063349304	0.444611088	-4.640795875	3.47E-06	2.08E-05	NA
ENSG00000228577	3.07633924	-2.063587233	0.532415067	-3.87589939	0.000106232	0.00046296	NA
ENSG00000108839	337.6097024	-2.064256016	0.262021955	-7.878179589	3.32E-15	7.57E-14	ALOX12
ENSG00000260246	3.633669441	-2.065069603	0.601909939	-3.430861445	0.000601668	0.002197535	NA
ENSG00000196660	19.27175945	-2.065684887	0.374605538	-5.514293511	3.50E-08	3.03E-07	SLC30A10
ENSG00000162552	1193.783317	-2.065934332	0.221221494	-9.338759516	9.75E-21	4.10E-19	WNT4
ENSG00000271795	73.93610679	-2.066377474	0.188869573	-10.94076423	7.36E-28	6.23E-26	NA
ENSG00000110203	20.88081445	-2.06639358	0.37512305	-5.508575336	3.62E-08	3.12E-07	FOLR3
ENSG00000169933	5.721709982	-2.069287669	0.383181848	-5.400275827	6.65E-08	5.47E-07	FRMPD4
ENSG00000251095	51.10034092	-2.069472904	0.350623366	-5.902267524	3.59E-09	3.67E-08	NA
ENSG00000158764	9.109709329	-2.069667988	0.353124903	-5.861008297	4.60E-09	4.63E-08	ITLN2
ENSG00000204949	315.0108791	-2.070002814	0.285920541	-7.239783503	4.49E-13	7.96E-12	FAM83A-AS1
ENSG00000225269	3.679561208	-2.070141164	0.39730603	-5.210444859	1.88E-07	1.43E-06	LINC00705
ENSG00000213225	47.16689793	-2.070860744	0.310176784	-6.6763886	2.45E-11	3.46E-10	NOC2LP1
ENSG00000207563	6.999346819	-2.071495242	0.442068875	-4.68591063	2.79E-06	1.70E-05	MIR23B
ENSG00000196743	12330.95908	-2.072637152	0.12567909	-16.49150354	4.22E-61	3.38E-58	GM2A
ENSG00000105668	45.6380712	-2.075681731	0.36253363	-5.725487404	1.03E-08	9.81E-08	UPK1A
ENSG00000068078	9033.427556	-2.078649393	0.22676431	-9.166563256	4.88E-20	1.91E-18	FGFR3
ENSG00000211896	156068.6664	-2.080556977	0.298090457	-6.979616185	2.96E-12	4.73E-11	IGHG1
ENSG00000235689	2.610939709	-2.080930997	0.552847242	-3.764025281	0.0001672	0.000694813	NA
ENSG00000242534	6.195591866	-2.084643294	0.516599924	-4.035314752	5.45E-05	0.000255149	IGKV2D-28
ENSG00000273962	0.964259676	-2.084961713	0.619020511	-3.368162569	0.00075671	0.002687584	IGKV2-40
ENSG00000256347	3.094318264	-2.085166027	0.395862872	-5.267394782	1.38E-07	1.07E-06	NA
ENSG00000154102	1010.314408	-2.085712742	0.191360728	-10.89937711	1.16E-27	9.67E-26	C16orf74
ENSG00000112378	82124.16064	-2.088300424	0.162993873	-12.81214061	1.40E-37	2.45E-35	PERP
ENSG00000260862	1.511337728	-2.088815226	0.48643418	-4.294137442	1.75E-05	9.13E-05	LOC101928446
ENSG00000215559	46.11604123	-2.088970386	0.338407165	-6.172949636	6.70E-10	7.68E-09	ANKRD20A11P
ENSG00000137699	35596.94498	-2.089164773	0.205009328	-10.19058399	2.18E-24	1.34E-22	TRIM29
ENSG00000180532	11.23011252	-2.090958113	0.41351863	-5.056502809	4.27E-07	3.03E-06	ZSCAN4
ENSG00000255558	0.731830172	-2.092728493	0.61458602	-3.405102665	0.000661392	0.002386309	NA
ENSG00000178919	1589.307713	-2.094591679	0.304575261	-6.877090643	6.11E-12	9.32E-11	FOXE1
ENSG00000181804	507.7915001	-2.094646226	0.228329681	-9.173779833	4.57E-20	1.80E-18	SLC9A9
ENSG00000217733	4.325398469	-2.094720471	0.316124025	-6.626261556	3.44E-11	4.77E-10	CCT7P1
ENSG00000184613	771.8748357	-2.09571666	0.309759825	-6.765618042	1.33E-11	1.93E-10	NELL2
ENSG00000100504	7936.28091	-2.095894235	0.169799028	-12.34338185	5.29E-35	7.62E-33	PYGL
ENSG00000183072	74.19683571	-2.096710845	0.521955728	-4.017028134	5.89E-05	0.000273357	NKX2-5
ENSG00000234283	3.259803581	-2.098644961	0.439890746	-4.770832256	1.83E-06	1.16E-05	NA
ENSG00000197191	670.1261458	-2.099219414	0.242458717	-8.658048851	4.80E-18	1.55E-16	CYSRT1
ENSG00000255491	0.754818867	-2.099344834	0.407808073	-5.147874631	2.63E-07	1.94E-06	LOC105375743
ENSG00000124260	30.94649655	-2.1007524	0.52269016	-4.019116024	5.84E-05	0.000271363	MAGEA10
ENSG00000248268	4.120715083	-2.101134008	0.613131804	-3.426887977	0.000610541	0.002225182	NA
ENSG00000250041	9.10519004	-2.10124257	0.26974815	-7.78964589	6.72E-15	1.47E-13	NA
ENSG00000261217	12.51005387	-2.102148947	0.370332792	-5.676378085	1.38E-08	1.28E-07	NA
ENSG00000223485	81.38645715	-2.10315377	0.299202421	-7.029200385	2.08E-12	3.39E-11	LINC01615
ENSG00000144476	3936.02634	-2.103809516	0.246282873	-8.542248547	1.32E-17	3.99E-16	ACKR3
ENSG00000230662	0.960014678	-2.105560783	0.633448572	-3.323964841	0.000887474	0.003095139	NA
ENSG00000216921	24.76780667	-2.106642981	0.290569337	-7.250052605	4.17E-13	7.42E-12	FAM240C
ENSG00000239542	4.242924547	-2.107305784	0.378493831	-5.567609323	2.58E-08	2.29E-07	RN7SL399P
ENSG00000206931	0.960006875	-2.107838137	0.466573028	-4.517702508	6.25E-06	3.57E-05	RNU6-1042P
ENSG00000226562	71.70832635	-2.109618596	0.303513585	-6.950656245	3.64E-12	5.75E-11	CYP4F26P
ENSG00000253239	11.89636115	-2.10991369	0.448783785	-4.701403572	2.58E-06	1.58E-05	IGLVI-70
ENSG00000267712	1.721475929	-2.113092247	0.40773513	-5.182512108	2.19E-07	1.63E-06	LINC01539
ENSG00000279164	6.923646649	-2.113951779	0.3260904	-6.482716993	9.01E-11	1.17E-09	NA
ENSG00000172005	1783.505033	-2.114944507	0.399058104	-5.299841012	1.16E-07	9.12E-07	MAL
ENSG00000167772	2722.990838	-2.118857558	0.253802483	-8.348450853	6.92E-17	1.94E-15	ANGPTL4
ENSG00000137875	387.9656167	-2.121168549	0.244693238	-8.668684775	4.37E-18	1.41E-16	BCL2L10
ENSG00000267291	20.07879805	-2.121383364	0.325606009	-6.51518493	7.26E-11	9.59E-10	LOC105372397
ENSG00000227531	1.641817079	-2.121562029	0.488278035	-4.344987645	1.39E-05	7.39E-05	NA
ENSG00000181092	2.093228161	-2.121753946	0.7174181	-2.957485942	0.003101589	0.009318322	ADIPOQ
ENSG00000229781	2.140798176	-2.122404782	0.45300415	-4.685177346	2.80E-06	1.70E-05	RRN3P4
ENSG00000100985	4041.886443	-2.124487104	0.260781663	-8.146612313	3.74E-16	9.62E-15	MMP9
ENSG00000178150	250.2600237	-2.125338049	0.282481861	-7.523803628	5.32E-14	1.05E-12	ZNF114
ENSG00000100628	770.527677	-2.126075119	0.208870667	-10.17890712	2.46E-24	1.50E-22	ASB2
ENSG00000224063	17.17998847	-2.126993344	0.39990026	-5.318809599	1.04E-07	8.28E-07	NA
ENSG00000118785	8443.949683	-2.127074999	0.25653537	-8.291546685	1.12E-16	3.07E-15	SPP1
ENSG00000176490	111.9481298	-2.129441234	0.314539565	-6.770026644	1.29E-11	1.88E-10	DIRAS1
ENSG00000156475	332.8520048	-2.130092143	0.303244316	-7.024343187	2.15E-12	3.50E-11	PPP2R2B
ENSG00000060558	5617.937051	-2.130539957	0.165708966	-12.85711936	7.84E-38	1.41E-35	GNA15
ENSG00000278266	31.91784414	-2.131011539	0.382548243	-5.570569401	2.54E-08	2.26E-07	NA
ENSG00000230109	0.684515641	-2.132263213	0.565418276	-3.771125386	0.000162513	0.000677348	LINC02643
ENSG00000205562	6.471628598	-2.132288621	0.444016716	-4.802271053	1.57E-06	1.00E-05	NA
ENSG00000186806	1036.172523	-2.132870978	0.255484579	-8.3483355	6.92E-17	1.94E-15	VSIG10L
ENSG00000104938	1.192667599	-2.134218961	0.473244878	-4.509756071	6.49E-06	3.69E-05	CLEC4M
ENSG00000255519	0.811662321	-2.134501208	0.651913441	-3.274209543	0.00105958	0.003623453	NA
ENSG00000224939	17.39614069	-2.135762083	0.281995219	-7.573752818	3.63E-14	7.29E-13	LINC00184
ENSG00000196616	25.93316727	-2.13730257	0.441432351	-4.841744304	1.29E-06	8.39E-06	ADH1B
ENSG00000228459	6.431430311	-2.137611085	0.313080755	-6.827666836	8.63E-12	1.29E-10	NA
ENSG00000205212	13.06210909	-2.139338864	0.597787903	-3.578759044	0.00034523	0.001333773	CCDC144NL
ENSG00000140600	127.5418809	-2.141024196	0.327515354	-6.537171979	6.27E-11	8.37E-10	SH3GL3
ENSG00000262681	42.3867012	-2.142877124	0.339239571	-6.316707452	2.67E-10	3.26E-09	NA
ENSG00000204936	293.9764517	-2.143042551	0.342365416	-6.2595182	3.86E-10	4.59E-09	CD177
ENSG00000254991	6.164514449	-2.143166905	0.342359671	-6.259986465	3.85E-10	4.58E-09	NA
ENSG00000248240	29.62960416	-2.143766916	0.252403553	-8.493410227	2.01E-17	5.97E-16	NA
ENSG00000214318	10.55812476	-2.143779605	0.310705425	-6.899717334	5.21E-12	8.04E-11	NA
ENSG00000243264	167.7073167	-2.144153539	0.385734553	-5.558624501	2.72E-08	2.40E-07	IGKV2D-29
ENSG00000165072	124.9147325	-2.145229402	0.298745631	-7.180789213	6.93E-13	1.20E-11	MAMDC2
ENSG00000277241	1.246835953	-2.145626764	0.504513236	-4.252865158	2.11E-05	0.000107973	FGFR3P4
ENSG00000188001	436.796841	-2.146135038	0.224554135	-9.557316933	1.21E-21	5.63E-20	TPRG1
ENSG00000224371	3.029189495	-2.146232605	0.52341432	-4.100446857	4.12E-05	0.000198102	NA
ENSG00000233532	18.58914839	-2.147684968	0.324346714	-6.621571543	3.55E-11	4.91E-10	LINC00460
ENSG00000268621	351.1340834	-2.147781381	0.374337079	-5.737559811	9.61E-09	9.19E-08	IGFL2-AS1
ENSG00000231924	2.097484352	-2.147877579	0.594951155	-3.61017465	0.000305991	0.001194425	PSG1
ENSG00000133661	206.0642117	-2.149324939	0.282740761	-7.601751266	2.92E-14	5.94E-13	SFTPD
ENSG00000230570	12.88695767	-2.149668437	0.358105648	-6.002888944	1.94E-09	2.06E-08	NA
ENSG00000231062	5.429881543	-2.150777742	0.542644418	-3.963512147	7.39E-05	0.000334861	NA
ENSG00000276850	635.5326552	-2.150916303	0.248505459	-8.655408667	4.91E-18	1.58E-16	NA
ENSG00000167769	6.161574523	-2.150938507	0.368435328	-5.838035454	5.28E-09	5.26E-08	ACER1
ENSG00000228971	1.778298925	-2.151286093	0.484927291	-4.436306497	9.15E-06	5.04E-05	LINC02607
ENSG00000231566	20.70479729	-2.152486387	0.225522087	-9.54445934	1.37E-21	6.34E-20	NA
ENSG00000235272	9.191171482	-2.153196799	0.373854642	-5.759449145	8.44E-09	8.16E-08	NA
ENSG00000176153	5695.596278	-2.154028463	0.391286122	-5.504995809	3.69E-08	3.18E-07	GPX2
ENSG00000157168	543.7638299	-2.154096622	0.293148552	-7.348140072	2.01E-13	3.71E-12	NRG1
ENSG00000169900	9.791128557	-2.154362839	0.511054893	-4.215521405	2.49E-05	0.000125454	PYDC1
ENSG00000125498	7.731055247	-2.155778472	0.38032605	-5.668237748	1.44E-08	1.34E-07	KIR2DL1
ENSG00000113905	9.518161854	-2.156380644	0.426008794	-5.0618219	4.15E-07	2.96E-06	HRG
ENSG00000128710	972.0348501	-2.157115623	0.200880248	-10.73831618	6.73E-27	5.18E-25	HOXD10
ENSG00000236049	0.886558075	-2.157738355	0.616185036	-3.501770133	0.000462178	0.001734795	LINC01920
ENSG00000104892	825.066354	-2.158520901	0.228063599	-9.464556853	2.95E-21	1.31E-19	KLC3
ENSG00000263201	1.639355937	-2.160628564	0.565629464	-3.819865657	0.000133524	0.000568127	DPEP2NB
ENSG00000115523	1791.569344	-2.16259107	0.261096235	-8.282735567	1.20E-16	3.30E-15	GNLY
ENSG00000230628	6.229085353	-2.167942183	0.32991021	-6.571309769	4.99E-11	6.75E-10	NA
ENSG00000257336	4.505835997	-2.169206945	0.355687572	-6.098630139	1.07E-09	1.19E-08	NA
ENSG00000268186	4.154516958	-2.170082702	0.374286635	-5.79791662	6.71E-09	6.57E-08	NA
ENSG00000196337	60.93343652	-2.170507152	0.228633644	-9.493384745	2.24E-21	1.01E-19	CGB7
ENSG00000123892	1534.890411	-2.170766477	0.209604469	-10.35648946	3.91E-25	2.56E-23	RAB38
ENSG00000096696	68865.15469	-2.171078616	0.155145553	-13.99381793	1.70E-44	4.56E-42	DSP
ENSG00000236268	4.1474457	-2.171187469	0.406618354	-5.339619938	9.31E-08	7.45E-07	LINC01361
ENSG00000123364	384.5190445	-2.171539515	0.279290873	-7.77518969	7.53E-15	1.64E-13	HOXC13
ENSG00000258137	2.91461054	-2.171919576	0.340655965	-6.375698056	1.82E-10	2.27E-09	LOC102724050
ENSG00000258088	5.251269398	-2.172804972	0.415258387	-5.232416834	1.67E-07	1.28E-06	NA
ENSG00000198930	32.44273006	-2.174285616	0.54099585	-4.019043062	5.84E-05	0.000271372	CSAG1
ENSG00000244247	1.338782489	-2.175359434	0.64875026	-3.35315385	0.000798963	0.002819577	LINC01995
ENSG00000182050	6.679870286	-2.175725027	0.407874769	-5.334296685	9.59E-08	7.65E-07	MGAT4C
ENSG00000269706	1.362505932	-2.176390347	0.675535748	-3.22172491	0.001274214	0.004258575	NA
ENSG00000206129	35.52156174	-2.177201673	0.428986739	-5.075219063	3.87E-07	2.78E-06	LOC642484
ENSG00000170848	2.591309038	-2.17770296	0.668975784	-3.25527921	0.001132809	0.003842686	PSG6
ENSG00000243491	61.6652646	-2.178788553	0.236020533	-9.231351701	2.67E-20	1.07E-18	NA
ENSG00000236366	1.677055006	-2.179739167	0.635891717	-3.427846453	0.000608389	0.002218569	LOC153910
ENSG00000253657	0.854434438	-2.180444413	0.719941247	-3.028642159	0.002456555	0.007591701	LOC101060000
ENSG00000164411	45.45543779	-2.180872221	0.40681251	-5.360877964	8.28E-08	6.68E-07	GJB7
ENSG00000259555	4.055244232	-2.184194719	0.347286723	-6.28931247	3.19E-10	3.84E-09	NA
ENSG00000134184	2228.42247	-2.185857481	0.46920825	-4.658608368	3.18E-06	1.92E-05	GSTM1
ENSG00000114270	22246.84215	-2.186923852	0.19299204	-11.33167901	9.14E-30	8.98E-28	COL7A1
ENSG00000166211	2.475212738	-2.193188387	0.468894745	-4.677357571	2.91E-06	1.76E-05	SPIC
ENSG00000185899	1.007385795	-2.193399922	0.51145372	-4.288559914	1.80E-05	9.33E-05	TAS2R60
ENSG00000239556	185.9879548	-2.194561998	0.241810317	-9.075551565	1.13E-19	4.26E-18	NA
ENSG00000224318	6.841990655	-2.195246629	0.489731463	-4.482551754	7.38E-06	4.14E-05	CHL1-AS2
ENSG00000243225	33.77276692	-2.195726645	0.358455453	-6.12552167	9.04E-10	1.01E-08	NA
ENSG00000257797	0.831615477	-2.195768674	0.605015051	-3.62927942	0.000284213	0.001116313	NA
ENSG00000251491	7.094034832	-2.197712462	0.495678896	-4.433742244	9.26E-06	5.09E-05	OR7E28P
ENSG00000171517	1239.720466	-2.198061712	0.235762112	-9.323218628	1.13E-20	4.71E-19	LPAR3
ENSG00000233746	1.609679897	-2.200007545	0.462161729	-4.760254706	1.93E-06	1.22E-05	LINC00656
ENSG00000259345	59.70945733	-2.201986504	0.272760012	-8.072981389	6.86E-16	1.71E-14	NA
ENSG00000103723	265.0797465	-2.204770574	0.281261151	-7.838873467	4.55E-15	1.02E-13	AP3B2
ENSG00000156234	1142.739642	-2.206323399	0.318393221	-6.929555197	4.22E-12	6.62E-11	CXCL13
ENSG00000213786	1.590836737	-2.206396369	0.503388726	-4.383086578	1.17E-05	6.31E-05	NA
ENSG00000213030	6.020881714	-2.207449091	0.458942321	-4.809861701	1.51E-06	9.72E-06	CGB8
ENSG00000125788	4.86447887	-2.210790941	0.6742627	-3.27882729	0.001042394	0.003570603	DEFB126
ENSG00000233445	0.917628155	-2.211170756	0.564843693	-3.914659549	9.05E-05	0.000401597	RPL17P11
ENSG00000136531	253.5649408	-2.212262589	0.386179918	-5.728580095	1.01E-08	9.65E-08	SCN2A
ENSG00000116996	0.927327085	-2.212804768	0.679935253	-3.254434534	0.001136183	0.003852131	ZP4
ENSG00000173267	1664.000752	-2.214109138	0.294681235	-7.513573557	5.75E-14	1.13E-12	SNCG
ENSG00000137273	325.9583663	-2.215663436	0.272412234	-8.13349462	4.17E-16	1.07E-14	FOXF2
ENSG00000175728	2.409057369	-2.216044938	0.481324478	-4.604056185	4.14E-06	2.44E-05	LINC02873
ENSG00000232886	1.738086625	-2.217416297	0.543347104	-4.081030858	4.48E-05	0.000213518	NA
ENSG00000134640	1.149373992	-2.217543246	0.71947352	-3.082174931	0.00205494	0.006498162	MTNR1B
ENSG00000249790	15.98283786	-2.219330622	0.366871793	-6.04933566	1.45E-09	1.58E-08	NA
ENSG00000225867	1.746940564	-2.220726018	0.471748787	-4.707433445	2.51E-06	1.54E-05	NA
ENSG00000168505	43.88184814	-2.223459118	0.350375346	-6.345934853	2.21E-10	2.72E-09	GBX2
ENSG00000253256	3.470941799	-2.224384125	0.341963123	-6.504748541	7.78E-11	1.02E-09	NA
ENSG00000231638	9.789382433	-2.22440636	0.383120727	-5.806019361	6.40E-09	6.29E-08	LUARIS
ENSG00000244675	63.08737466	-2.227590403	0.364104287	-6.118001037	9.48E-10	1.06E-08	NA
ENSG00000235884	64.05541508	-2.230520672	0.358303847	-6.225221104	4.81E-10	5.65E-09	NA
ENSG00000270432	1.349674551	-2.233518078	0.577314	-3.868809827	0.000109368	0.000475412	OR7E108P
ENSG00000236700	23.64293827	-2.23504974	0.287499836	-7.774090477	7.60E-15	1.65E-13	LINC01010
ENSG00000238243	9.858378177	-2.235411271	0.500223649	-4.468823645	7.87E-06	4.39E-05	OR2W3
ENSG00000113749	44.69228037	-2.236453913	0.279829285	-7.992208218	1.33E-15	3.18E-14	HRH2
ENSG00000121446	3.812129277	-2.237179226	0.447871298	-4.995138642	5.88E-07	4.07E-06	RGSL1
ENSG00000167779	1873.269682	-2.237953377	0.283987136	-7.880474479	3.26E-15	7.45E-14	IGFBP6
ENSG00000170523	23.14850771	-2.239125716	0.395045276	-5.668023011	1.44E-08	1.34E-07	KRT83
ENSG00000229544	91.4863216	-2.239263349	0.365034855	-6.134382281	8.55E-10	9.62E-09	NKX1-2
ENSG00000163623	9.612146677	-2.239454275	0.473811403	-4.726467667	2.28E-06	1.42E-05	NKX6-1
ENSG00000252711	6.180307723	-2.240987652	0.316928781	-7.070950286	1.54E-12	2.54E-11	RN7SKP116
ENSG00000164485	63.6622352	-2.241359812	0.311778631	-7.188946222	6.53E-13	1.13E-11	IL22RA2
ENSG00000254303	0.922728444	-2.246124935	0.464563227	-4.834917622	1.33E-06	8.66E-06	NA
ENSG00000124102	24336.71439	-2.246463973	0.371942112	-6.039821518	1.54E-09	1.66E-08	PI3
ENSG00000177679	985.4260794	-2.24740806	0.237070504	-9.479914288	2.54E-21	1.14E-19	SRRM3
ENSG00000090530	3333.139693	-2.248537463	0.262549162	-8.564253046	1.09E-17	3.34E-16	P3H2
ENSG00000154654	147.7336487	-2.248974982	0.368424683	-6.104300509	1.03E-09	1.15E-08	NCAM2
ENSG00000174837	63.97517585	-2.249546316	0.263371505	-8.541342843	1.33E-17	4.02E-16	ADGRE1
ENSG00000236449	10.58555738	-2.249849783	0.364088423	-6.179404894	6.43E-10	7.40E-09	NA
ENSG00000170961	528.751632	-2.250253775	0.310369713	-7.250236348	4.16E-13	7.41E-12	HAS2
ENSG00000224525	0.900095307	-2.251113508	0.715234396	-3.147378704	0.001647414	0.005340501	NA
ENSG00000279650	0.862644409	-2.253892964	0.56446932	-3.992941483	6.53E-05	0.000299699	NA
ENSG00000138755	5051.726407	-2.257062381	0.295383953	-7.641113749	2.15E-14	4.42E-13	CXCL9
ENSG00000232328	1.311185035	-2.258672118	0.470455238	-4.801035115	1.58E-06	1.01E-05	NA
ENSG00000225735	0.778244747	-2.259646042	0.679904846	-3.323473944	0.000889037	0.00310004	NEK4P1
ENSG00000161642	6643.969644	-2.260906999	0.141662503	-15.95981257	2.43E-57	1.51E-54	ZNF385A
ENSG00000167080	198.7752564	-2.261593864	0.493548856	-4.582310012	4.60E-06	2.70E-05	B4GALNT2
ENSG00000236124	2.69351611	-2.261954973	0.413964677	-5.464125566	4.65E-08	3.93E-07	NA
ENSG00000149527	3079.638242	-2.261975223	0.218781	-10.33899299	4.69E-25	3.06E-23	PLCH2
ENSG00000185963	6977.968246	-2.262835822	0.137473111	-16.46020668	7.09E-61	5.44E-58	BICD2
ENSG00000260186	14.54197414	-2.265882402	0.311996654	-7.262521486	3.80E-13	6.80E-12	NA
ENSG00000266401	7.56929471	-2.269882938	0.474029011	-4.788489494	1.68E-06	1.07E-05	LOC105371967
ENSG00000176014	9404.668021	-2.271777366	0.170423663	-13.33017563	1.55E-40	3.27E-38	TUBB6
ENSG00000203864	1.065955039	-2.276320071	0.410287597	-5.548108424	2.89E-08	2.54E-07	LINC02868
ENSG00000145777	163.762977	-2.276560428	0.27176618	-8.376908503	5.43E-17	1.54E-15	TSLP
ENSG00000187134	1743.279102	-2.277637476	0.304378042	-7.482923082	7.27E-14	1.41E-12	AKR1C1
ENSG00000125355	208.2272243	-2.277960486	0.273391354	-8.332233096	7.93E-17	2.22E-15	TMEM255A
ENSG00000167914	84.70771788	-2.281358133	0.285570577	-7.988771654	1.36E-15	3.26E-14	GSDMA
ENSG00000172345	553.197401	-2.28205127	0.175713939	-12.98730925	1.44E-38	2.73E-36	STARD5
ENSG00000143452	244.3687968	-2.282440539	0.394471964	-5.786065286	7.21E-09	7.02E-08	HORMAD1
ENSG00000259308	8.510062119	-2.287052269	0.264623192	-8.642675096	5.49E-18	1.75E-16	NA
ENSG00000164509	34.08292003	-2.287380218	0.336771863	-6.792076393	1.11E-11	1.63E-10	IL31RA
ENSG00000105427	2531.079848	-2.29331844	0.29612456	-7.744438481	9.60E-15	2.06E-13	CNFN
ENSG00000225146	6.096864858	-2.293547031	0.518784052	-4.421005278	9.82E-06	5.38E-05	NA
ENSG00000249721	5.460722194	-2.294084186	0.770632752	-2.976883838	0.002911943	0.008812069	NA
ENSG00000225764	13.50167763	-2.29443425	0.380032141	-6.037474207	1.57E-09	1.68E-08	P3H2-AS1
ENSG00000230638	173.4608635	-2.295993857	0.245069598	-9.368742089	7.34E-21	3.14E-19	LOC100418723
ENSG00000215874	1.353730753	-2.297937599	0.446236518	-5.149595576	2.61E-07	1.92E-06	CAPNS1P1
ENSG00000256039	129.1013956	-2.298933858	0.330020816	-6.966026816	3.26E-12	5.19E-11	NA
ENSG00000275393	55.05378387	-2.299547266	0.243257944	-9.453123017	3.29E-21	1.45E-19	NA
ENSG00000197977	85.47440559	-2.299972416	0.330423573	-6.960678976	3.39E-12	5.39E-11	ELOVL2
ENSG00000187193	8148.132125	-2.301381533	0.202419793	-11.36935028	5.94E-30	5.91E-28	MT1X
ENSG00000267313	41.14630165	-2.302349977	0.70042253	-3.287087265	0.001012295	0.00348089	KC6
ENSG00000214514	117.4433216	-2.302756344	0.263343587	-8.744303865	2.24E-18	7.43E-17	KRT42P
ENSG00000114948	1062.211382	-2.303111723	0.363472491	-6.336412747	2.35E-10	2.88E-09	ADAM23
ENSG00000256155	5.152667982	-2.303474321	0.36603496	-6.293044579	3.11E-10	3.76E-09	NA
ENSG00000134028	435.4466836	-2.304604209	0.273963887	-8.412072982	4.03E-17	1.16E-15	ADAMDEC1
ENSG00000225840	40.69012087	-2.306628184	0.476187967	-4.84394471	1.27E-06	8.31E-06	NA
ENSG00000226308	17.00224109	-2.309156174	0.406188195	-5.684941613	1.31E-08	1.22E-07	NA
ENSG00000271707	4.193411826	-2.309447235	0.266585189	-8.663074062	4.59E-18	1.48E-16	NA
ENSG00000248590	4.837131974	-2.309632145	0.534018592	-4.325003248	1.53E-05	8.04E-05	NA
ENSG00000267922	23.08878407	-2.309749527	0.383764923	-6.018657228	1.76E-09	1.88E-08	NA
ENSG00000128714	449.9365988	-2.313117439	0.306415276	-7.548962539	4.39E-14	8.74E-13	HOXD13
ENSG00000278514	21.38341762	-2.313522828	0.225175569	-10.27430655	9.20E-25	5.84E-23	NA
ENSG00000173338	151.419134	-2.313539079	0.242960057	-9.522302153	1.69E-21	7.74E-20	KCNK7
ENSG00000131885	46.12365143	-2.3154511	0.278622823	-8.310342559	9.54E-17	2.64E-15	NA
ENSG00000228586	1.023664089	-2.315498428	0.616445306	-3.756210658	0.000172506	0.000713833	NA
ENSG00000143382	1573.424698	-2.316383386	0.268631065	-8.62291703	6.53E-18	2.07E-16	ADAMTSL4
ENSG00000063515	1.933029428	-2.317280992	0.519566641	-4.460026508	8.19E-06	4.55E-05	GSC2
ENSG00000070748	7.84255359	-2.317696678	0.708532671	-3.271121818	0.001071218	0.003656867	CHAT
ENSG00000260066	1.625613662	-2.318264361	0.638114614	-3.632990546	0.000280155	0.001102805	NA
ENSG00000258902	1.031939805	-2.319163117	0.637978663	-3.63517348	0.000277794	0.001094609	NA
ENSG00000237989	384.5027448	-2.321755841	0.205865921	-11.27799993	1.69E-29	1.62E-27	LINC01679
ENSG00000253315	9.87469693	-2.322370672	0.289380134	-8.025328635	1.01E-15	2.47E-14	LINC01932
ENSG00000241104	1.076184899	-2.326352442	0.526128458	-4.421643436	9.80E-06	5.36E-05	LOC284344
ENSG00000281097	11.01485636	-2.326818941	0.409493505	-5.682187665	1.33E-08	1.24E-07	LINC01395
ENSG00000134755	15704.5652	-2.326870806	0.218722475	-10.63846233	1.97E-26	1.44E-24	DSC2
ENSG00000128422	254346.4079	-2.329574997	0.263522249	-8.840145401	9.56E-19	3.28E-17	KRT17
ENSG00000230453	221.8531416	-2.329927065	0.281346101	-8.281355437	1.22E-16	3.33E-15	ANKRD18B
ENSG00000261478	11.17259929	-2.330137457	0.318594845	-7.313795223	2.60E-13	4.72E-12	NA
ENSG00000224559	2.586724248	-2.330563757	0.551140668	-4.228618742	2.35E-05	0.000119017	LINC01087
ENSG00000244474	0.959135239	-2.331740423	0.736861129	-3.164423162	0.001553907	0.005073049	UGT1A4
ENSG00000268287	22.67684908	-2.334381603	0.248300432	-9.401439954	5.38E-21	2.34E-19	NA
ENSG00000182366	8.407095636	-2.334570199	0.325393681	-7.174602142	7.25E-13	1.25E-11	FAM87A
ENSG00000132164	575.9176433	-2.336533555	0.332215967	-7.033176572	2.02E-12	3.29E-11	SLC6A11
ENSG00000171444	2222.519645	-2.337617364	0.161709805	-14.45563156	2.31E-47	7.87E-45	MCC
ENSG00000251692	10.62896895	-2.337935272	0.434367873	-5.382385337	7.35E-08	6.00E-07	PTX4
ENSG00000146648	11777.84535	-2.339414062	0.193670836	-12.07933065	1.36E-33	1.79E-31	EGFR
ENSG00000233517	7.005416916	-2.34401942	0.381243647	-6.148350114	7.83E-10	8.85E-09	NA
ENSG00000139144	40.15058162	-2.346360967	0.425069391	-5.51994807	3.39E-08	2.94E-07	PIK3C2G
ENSG00000271369	7.497029317	-2.349556706	0.407346399	-5.767957475	8.02E-09	7.77E-08	NA
ENSG00000111405	126.5541588	-2.349898803	0.366912108	-6.404527811	1.51E-10	1.90E-09	ENDOU
ENSG00000154198	10.6758147	-2.351465954	0.417153223	-5.636935841	1.73E-08	1.58E-07	CYP4Z2P
ENSG00000223342	0.887944137	-2.353830298	0.577689862	-4.074557048	4.61E-05	0.000219039	NA
ENSG00000147689	9913.80585	-2.35534282	0.273683428	-8.606084918	7.56E-18	2.38E-16	FAM83A
ENSG00000189280	2693.630113	-2.359028789	0.208727838	-11.30193658	1.28E-29	1.24E-27	GJB5
ENSG00000260454	4.262448326	-2.359539164	0.423878214	-5.566549745	2.60E-08	2.30E-07	NA
ENSG00000126467	39.24164893	-2.360230462	0.355961427	-6.630579286	3.34E-11	4.63E-10	TSKS
ENSG00000134245	939.9624139	-2.361951636	0.231212226	-10.21551358	1.69E-24	1.04E-22	WNT2B
ENSG00000223808	0.887211607	-2.362344874	0.743662361	-3.176636331	0.001489937	0.004890923	NA
ENSG00000234861	1.352412112	-2.363451269	0.503204173	-4.696803795	2.64E-06	1.62E-05	ATP5F1AP1
ENSG00000137869	26.2399011	-2.367314994	0.249338776	-9.494371595	2.22E-21	1.00E-19	CYP19A1
ENSG00000240427	2.52534088	-2.369487934	0.708804221	-3.34293711	0.000828967	0.002912828	NA
ENSG00000250292	10.89382316	-2.369874325	0.428692121	-5.528149946	3.24E-08	2.82E-07	NA
ENSG00000259630	35.18918239	-2.371956529	0.229896711	-10.31748789	5.87E-25	3.79E-23	NA
ENSG00000276600	1962.365602	-2.37332565	0.211519937	-11.22034021	3.24E-29	3.07E-27	RAB7B
ENSG00000235180	2.540773849	-2.373558875	0.563524702	-4.211987276	2.53E-05	0.000127291	LINC00601
ENSG00000264785	5.373237503	-2.373706437	0.463765628	-5.118331968	3.08E-07	2.25E-06	NA
ENSG00000226005	1.755841793	-2.374590986	0.793731687	-2.991679714	0.002774472	0.008446285	NA
ENSG00000139926	4866.369365	-2.375065886	0.168584257	-14.08830178	4.48E-45	1.31E-42	FRMD6
ENSG00000261332	3.67667783	-2.3760647	0.542371314	-4.380881952	1.18E-05	6.36E-05	NA
ENSG00000225916	1.916106894	-2.376271598	0.37087867	-6.407140099	1.48E-10	1.87E-09	NA
ENSG00000254084	0.85926002	-2.380423401	0.434182015	-5.482547218	4.19E-08	3.58E-07	NA
ENSG00000269989	9.785110412	-2.380497572	0.327302499	-7.273080955	3.51E-13	6.31E-12	NA
ENSG00000271392	19.29294576	-2.38291591	0.376684929	-6.32601871	2.52E-10	3.08E-09	NA
ENSG00000108602	6114.001112	-2.386738672	0.334191699	-7.141825117	9.21E-13	1.57E-11	ALDH3A1
ENSG00000205413	4737.233235	-2.392009218	0.194013262	-12.32910159	6.31E-35	9.03E-33	SAMD9
ENSG00000252920	0.815718554	-2.392581185	0.719510185	-3.325291613	0.000883261	0.003082641	NA
ENSG00000260377	16.78071864	-2.39313712	0.350392729	-6.829870947	8.50E-12	1.27E-10	NA
ENSG00000225492	678.2486185	-2.393783935	0.22926131	-10.4412905	1.61E-25	1.09E-23	GBP1P1
ENSG00000256249	2.403956266	-2.394076714	0.348741213	-6.86490906	6.65E-12	1.01E-10	NA
ENSG00000226633	3.057215408	-2.394287417	0.37498073	-6.385094549	1.71E-10	2.14E-09	PPIAP28
ENSG00000147509	197.4427105	-2.394456455	0.233241319	-10.26600459	1.00E-24	6.35E-23	RGS20
ENSG00000206072	194.3740038	-2.396102039	0.463570166	-5.168801221	2.36E-07	1.75E-06	SERPINB11
ENSG00000178445	850.6698389	-2.398146242	0.385475745	-6.221263652	4.93E-10	5.79E-09	GLDC
ENSG00000215369	1.742311024	-2.398354519	0.458415505	-5.231835512	1.68E-07	1.28E-06	NA
ENSG00000178184	1689.74399	-2.398825274	0.172716465	-13.88880487	7.41E-44	1.91E-41	PARD6G
ENSG00000230836	11.88078196	-2.402603955	0.352404916	-6.817736766	9.25E-12	1.38E-10	NA
ENSG00000248432	1.085275622	-2.402693918	0.756069125	-3.17787599	0.001483582	0.004874324	NA
ENSG00000253608	6.288955331	-2.403597692	0.298606131	-8.049391623	8.32E-16	2.05E-14	LOC101929268
ENSG00000070808	52.31640641	-2.404461392	0.276912037	-8.683123403	3.85E-18	1.25E-16	CAMK2A
ENSG00000229436	1.480372227	-2.409896188	0.606250653	-3.975082215	7.04E-05	0.000320325	NA
ENSG00000279197	7.192731904	-2.410853365	0.421817807	-5.715390205	1.09E-08	1.04E-07	NA
ENSG00000161243	1190.193809	-2.411761428	0.211584894	-11.39855204	4.25E-30	4.32E-28	FBXO27
ENSG00000092345	3.38497437	-2.415149041	0.438656189	-5.505790419	3.68E-08	3.17E-07	DAZL
ENSG00000259023	11.33870608	-2.416123211	0.437402825	-5.523794255	3.32E-08	2.88E-07	LINC00524
ENSG00000228314	315.8681732	-2.416475904	0.385265445	-6.272236289	3.56E-10	4.26E-09	CYP4F29P
ENSG00000260131	1.481706212	-2.417081944	0.465062829	-5.197323449	2.02E-07	1.52E-06	NA
ENSG00000231574	11.24678788	-2.417389943	0.352025487	-6.867087838	6.55E-12	9.96E-11	LINC02015
ENSG00000211964	268.7808686	-2.419360666	0.362644276	-6.671443143	2.53E-11	3.57E-10	IGHV3-48
ENSG00000171462	458.781952	-2.422770473	0.222435346	-10.89202107	1.26E-27	1.04E-25	DLK2
ENSG00000243550	2.200522949	-2.423563266	0.563025312	-4.304536965	1.67E-05	8.75E-05	NA
ENSG00000223729	1.110916561	-2.423586652	0.769340219	-3.150214419	0.001631507	0.005294189	LINC02247
ENSG00000115488	0.854028653	-2.423595078	0.8198214	-2.95624764	0.00311407	0.009351393	NEU2
ENSG00000227128	14.8148948	-2.424473593	0.505499676	-4.796192184	1.62E-06	1.03E-05	NA
ENSG00000181965	1.894494103	-2.426356832	0.642969066	-3.773675845	0.00016086	0.0006711	NEUROG1
ENSG00000269970	9.936384684	-2.428972064	0.295092712	-8.231216719	1.85E-16	4.96E-15	NA
ENSG00000134955	1308.047737	-2.430161989	0.200236531	-12.13645669	6.77E-34	9.18E-32	SLC37A2
ENSG00000103034	2107.743447	-2.431739702	0.277655388	-8.758121771	1.99E-18	6.61E-17	NDRG4
ENSG00000228626	6.184391552	-2.433102926	0.457496613	-5.318297134	1.05E-07	8.30E-07	NA
ENSG00000237265	6.875661946	-2.433845831	0.401124877	-6.067551463	1.30E-09	1.42E-08	LOC100129291
ENSG00000224568	1.216171486	-2.434847884	0.751690518	-3.239162697	0.001198812	0.004037913	LINC01886
ENSG00000171658	264.7070275	-2.438369913	0.345154912	-7.06456675	1.61E-12	2.66E-11	NMRAL2P
ENSG00000248807	1.064475485	-2.441516663	0.583505878	-4.184219483	2.86E-05	0.000142286	NA
ENSG00000213412	11.16325339	-2.443983017	0.348512264	-7.01261698	2.34E-12	3.80E-11	HNRNPA1P33
ENSG00000171487	1.793088716	-2.446163149	0.799086002	-3.061201352	0.002204508	0.006911632	NLRP5
ENSG00000072041	177.4211552	-2.447084501	0.493690553	-4.956717294	7.17E-07	4.89E-06	SLC6A15
ENSG00000213118	1.654451016	-2.449015397	0.550573416	-4.448117775	8.66E-06	4.79E-05	NA
ENSG00000169245	6506.520581	-2.449987803	0.302630976	-8.095628004	5.70E-16	1.43E-14	CXCL10
ENSG00000169436	476.0526929	-2.454611759	0.359960707	-6.819110284	9.16E-12	1.36E-10	COL22A1
ENSG00000186197	567.6067515	-2.456363384	0.226551289	-10.84241629	2.17E-27	1.76E-25	EDARADD
ENSG00000064886	301.1524816	-2.457533008	0.280819891	-8.75127825	2.11E-18	7.00E-17	CHI3L2
ENSG00000266995	9.900142035	-2.458465515	0.286990276	-8.566372189	1.07E-17	3.29E-16	NA
ENSG00000227802	2.235549922	-2.460792299	0.542851542	-4.533085211	5.81E-06	3.34E-05	DNAJB3
ENSG00000120217	1089.828432	-2.46133997	0.235899898	-10.43383227	1.74E-25	1.18E-23	CD274
ENSG00000135454	436.9060801	-2.463051786	0.28539094	-8.630448405	6.11E-18	1.94E-16	B4GALNT1
ENSG00000199488	1.843514666	-2.466958768	0.535430572	-4.607429789	4.08E-06	2.41E-05	RNU1-70P
ENSG00000179542	56.92727383	-2.466988645	0.400599883	-6.158236055	7.36E-10	8.36E-09	SLITRK4
ENSG00000110400	18272.91731	-2.468194357	0.164405646	-15.01283212	6.05E-51	2.58E-48	NECTIN1
ENSG00000263655	1.241975665	-2.470182096	0.585001507	-4.222522619	2.42E-05	0.000122063	NA
ENSG00000134121	950.6881387	-2.474055142	0.382335644	-6.470898489	9.74E-11	1.26E-09	CHL1
ENSG00000130829	539.4510236	-2.476666072	0.295413484	-8.383727249	5.13E-17	1.46E-15	DUSP9
ENSG00000204542	125.0977606	-2.47686735	0.511399022	-4.843316559	1.28E-06	8.33E-06	C6orf15
ENSG00000234880	2.821354944	-2.477086451	0.474716089	-5.218037708	1.81E-07	1.37E-06	LINC00163
ENSG00000243953	0.92416414	-2.483510666	0.630367385	-3.939782932	8.16E-05	0.000365544	LOC105374171
ENSG00000206075	16351.88282	-2.483705309	0.253137038	-9.8117025	1.00E-22	5.34E-21	SERPINB5
ENSG00000170683	1.151895935	-2.484787951	0.563888961	-4.406519941	1.05E-05	5.72E-05	OR10A3
ENSG00000145451	9.158301671	-2.487413943	0.434708552	-5.7220267	1.05E-08	1.00E-07	GLRA3
ENSG00000221845	1.980184275	-2.490808748	0.482110045	-5.166473451	2.39E-07	1.77E-06	C7orf65
ENSG00000174792	16.78710616	-2.491639122	0.332490012	-7.493876605	6.69E-14	1.30E-12	ODAPH
ENSG00000175315	853.8008787	-2.492269363	0.294565826	-8.46082315	2.65E-17	7.80E-16	CST6
ENSG00000211639	136.8830691	-2.493536199	0.427320077	-5.835289123	5.37E-09	5.34E-08	IGLV4-60
ENSG00000173391	1044.965459	-2.494308348	0.300920516	-8.288927538	1.14E-16	3.14E-15	OLR1
ENSG00000246740	25.74572279	-2.495457547	0.296244641	-8.423637769	3.65E-17	1.06E-15	PLA2G4E-AS1
ENSG00000226043	1.376190517	-2.50128976	0.747859071	-3.344600416	0.000824012	0.002896758	NA
ENSG00000232679	8.729227081	-2.501963559	0.369227435	-6.776212495	1.23E-11	1.81E-10	NA
ENSG00000168824	899.7209686	-2.502336323	0.305329578	-8.195525433	2.50E-16	6.57E-15	NSG1
ENSG00000225523	28.36102503	-2.502646492	0.422014999	-5.930231142	3.03E-09	3.13E-08	IGKV6D-21
ENSG00000259218	2.651157943	-2.503590797	0.415182328	-6.030099614	1.64E-09	1.76E-08	LINC00928
ENSG00000230988	4.20857226	-2.506296175	0.518615582	-4.832666548	1.35E-06	8.74E-06	RPL23AP11
ENSG00000248362	3.280863942	-2.507822063	0.492734203	-5.08960419	3.59E-07	2.59E-06	NA
ENSG00000237735	2.32001746	-2.510440113	0.572475775	-4.38523379	1.16E-05	6.25E-05	NA
ENSG00000230990	1.948850219	-2.510628767	0.508291187	-4.939351365	7.84E-07	5.31E-06	NA
ENSG00000228349	1.804369656	-2.51135932	0.822047399	-3.055005493	0.002250564	0.007038326	RPS26P4
ENSG00000224853	15.14707815	-2.511955715	0.492142866	-5.104118919	3.32E-07	2.41E-06	NA
ENSG00000095303	2399.320117	-2.512113184	0.238226856	-10.54504614	5.35E-26	3.77E-24	PTGS1
ENSG00000104055	289.9151094	-2.513142821	0.312957955	-8.030288985	9.72E-16	2.38E-14	TGM5
ENSG00000183631	2.687682917	-2.51331621	0.612847179	-4.101048835	4.11E-05	0.000197685	PRR32
ENSG00000279141	278.0669924	-2.515686638	0.274801676	-9.154553485	5.46E-20	2.13E-18	LINC01451
ENSG00000173077	12.25989685	-2.517600057	0.342878359	-7.342545798	2.10E-13	3.86E-12	DELEC1
ENSG00000232164	4.571142314	-2.51773584	0.371101995	-6.784484783	1.17E-11	1.71E-10	LINC01873
ENSG00000186723	5.025666007	-2.519766484	0.45324205	-5.559427863	2.71E-08	2.39E-07	OR10H1
ENSG00000100433	46.91390087	-2.519854522	0.453368151	-5.558075739	2.73E-08	2.41E-07	KCNK10
ENSG00000267327	10.78061067	-2.52015658	0.573659588	-4.393122042	1.12E-05	6.05E-05	LOC107985164
ENSG00000185847	2.854952452	-2.527194143	0.491806593	-5.138593459	2.77E-07	2.03E-06	LINC01405
ENSG00000184108	1.095539752	-2.531244261	0.702305391	-3.604193123	0.000313124	0.001219839	TRIML1
ENSG00000273976	1.134251634	-2.534941076	0.830064875	-3.053907172	0.00225882	0.007056875	GOLGA6L1
ENSG00000269526	7.543827401	-2.536143893	0.591900215	-4.284749066	1.83E-05	9.49E-05	ERVV-1
ENSG00000117971	219.6752208	-2.536235868	0.277343618	-9.144742147	5.98E-20	2.32E-18	CHRNB4
ENSG00000151136	1334.984358	-2.545036717	0.221794668	-11.47474257	1.77E-30	1.88E-28	BTBD11
ENSG00000260913	9.098873935	-2.547062172	0.451047532	-5.646992811	1.63E-08	1.50E-07	LINC01254
ENSG00000196549	1811.46038	-2.547361202	0.368178499	-6.918821198	4.55E-12	7.09E-11	MME
ENSG00000118160	255.8982427	-2.547765006	0.382902396	-6.653823622	2.86E-11	3.99E-10	SLC8A2
ENSG00000108342	497.8201412	-2.548837798	0.395250957	-6.448656871	1.13E-10	1.45E-09	CSF3
ENSG00000167165	173.7117577	-2.548949219	0.421202699	-6.051597547	1.43E-09	1.56E-08	UGT1A6
ENSG00000169252	830.3248279	-2.549341609	0.249636706	-10.21220658	1.75E-24	1.08E-22	ADRB2
ENSG00000262406	2017.043376	-2.550171282	0.281397088	-9.062536142	1.27E-19	4.79E-18	MMP12
ENSG00000186207	2.220671454	-2.559929584	0.483467054	-5.294941119	1.19E-07	9.35E-07	LCE5A
ENSG00000225243	6.891027962	-2.563510311	0.445708164	-5.751544437	8.84E-09	8.52E-08	NA
ENSG00000256980	20.49607901	-2.563997064	0.367306002	-6.980547694	2.94E-12	4.71E-11	KHDC1L
ENSG00000258713	8.241859022	-2.571399041	0.512789335	-5.014532998	5.32E-07	3.71E-06	C20orf141
ENSG00000183034	17.49367574	-2.571879311	0.370729251	-6.937352005	4.00E-12	6.30E-11	OTOP2
ENSG00000248554	51.4132602	-2.573137695	0.239004101	-10.76608175	4.98E-27	3.90E-25	NA
ENSG00000225950	288.8969558	-2.5748972	0.225972144	-11.39475493	4.44E-30	4.50E-28	NTF4
ENSG00000163472	3422.489817	-2.57499001	0.168599906	-15.27278439	1.16E-52	5.62E-50	TMEM79
ENSG00000249326	1.823241191	-2.576853097	0.567579607	-4.540073432	5.62E-06	3.25E-05	CTD-2194D22.4
ENSG00000207568	4.071566933	-2.577636786	0.43323123	-5.949794498	2.68E-09	2.79E-08	MIR203A
ENSG00000237850	1.176215072	-2.57869425	0.773013286	-3.335899003	0.00085024	0.002978008	LOC645202
ENSG00000236279	25.52099705	-2.581671808	0.473298248	-5.454640538	4.91E-08	4.13E-07	CLEC2L
ENSG00000275216	1082.074617	-2.583523725	0.434741824	-5.942662012	2.80E-09	2.91E-08	NA
ENSG00000259240	18.51757741	-2.583601523	0.265409673	-9.734390949	2.15E-22	1.10E-20	MIR4713HG
ENSG00000125780	332.0069003	-2.584001641	0.484288352	-5.335667538	9.52E-08	7.60E-07	TGM3
ENSG00000233708	3.352964784	-2.584707803	0.431158957	-5.994790929	2.04E-09	2.15E-08	NA
ENSG00000249500	1.406195551	-2.58478992	0.610219599	-4.23583563	2.28E-05	0.000115691	LINC01179
ENSG00000253949	0.953350389	-2.585959564	0.857954483	-3.014098784	0.002577439	0.007915337	NA
ENSG00000232633	8.646170761	-2.586191645	0.230968025	-11.19718475	4.21E-29	3.95E-27	NA
ENSG00000122733	41.58721884	-2.588409049	0.311291031	-8.315077513	9.17E-17	2.55E-15	PHF24
ENSG00000214544	148.7887702	-2.589171832	0.318320885	-8.133842159	4.16E-16	1.06E-14	GTF2IRD2P1
ENSG00000236009	3.123871178	-2.590940478	0.783699978	-3.306036177	0.000946259	0.003277113	NA
ENSG00000230881	1.290637851	-2.592618902	0.492203854	-5.26736815	1.38E-07	1.07E-06	NA
ENSG00000227154	2.145301235	-2.596343078	0.418097602	-6.209897082	5.30E-10	6.20E-09	NA
ENSG00000156466	52.81837682	-2.600538044	0.397858784	-6.536334365	6.30E-11	8.40E-10	GDF6
ENSG00000129437	151.018928	-2.600613556	0.350399657	-7.421849597	1.15E-13	2.20E-12	KLK14
ENSG00000280693	266.6137537	-2.601275251	0.266742649	-9.752003502	1.81E-22	9.32E-21	SH3PXD2A-AS1
ENSG00000170688	1.158910039	-2.604362704	0.50961239	-5.110477597	3.21E-07	2.33E-06	NA
ENSG00000266553	4.946274153	-2.605816207	0.480807343	-5.419668072	5.97E-08	4.95E-07	RN7SL356P
ENSG00000243276	0.916417425	-2.605995666	0.838301125	-3.108662973	0.00187936	0.006001544	NA
ENSG00000231505	2.917534508	-2.607438246	0.731032103	-3.566790346	0.00036138	0.001390004	NA
ENSG00000241635	2.255267386	-2.609116354	0.518638683	-5.030701408	4.89E-07	3.44E-06	UGT1A1
ENSG00000205634	6.548868684	-2.609592018	0.596986157	-4.371277271	1.24E-05	6.63E-05	LINC00898
ENSG00000219375	2.97603647	-2.613279723	0.371467845	-7.035009241	1.99E-12	3.25E-11	NA
ENSG00000169860	2140.220182	-2.615543099	0.25426246	-10.28678436	8.08E-25	5.16E-23	P2RY1
ENSG00000266634	2.257805631	-2.618288159	0.652997369	-4.009645803	6.08E-05	0.000281379	MIR3972
ENSG00000235647	1.157994706	-2.618771621	0.674715002	-3.881300418	0.000103899	0.000454008	NA
ENSG00000204539	18.71330859	-2.621468556	0.420862869	-6.228795059	4.70E-10	5.54E-09	CDSN
ENSG00000163825	23.28678212	-2.625371414	0.611732868	-4.291695853	1.77E-05	9.22E-05	RTP3
ENSG00000259701	1.911056792	-2.628441524	0.35644675	-7.374008945	1.66E-13	3.09E-12	NA
ENSG00000258942	5.29681159	-2.628482097	0.320460613	-8.202200181	2.36E-16	6.25E-15	NA
ENSG00000259107	0.942075947	-2.628810432	0.78639657	-3.342855923	0.000829209	0.002913199	LINC00911
ENSG00000075618	15347.35693	-2.629867682	0.198738873	-13.23277947	5.67E-40	1.15E-37	FSCN1
ENSG00000138311	223.7643264	-2.63447614	0.274318644	-9.603707925	7.71E-22	3.66E-20	ZNF365
ENSG00000277013	340.422846	-2.634670444	0.242928689	-10.84544792	2.10E-27	1.70E-25	NA
ENSG00000224194	3.12175463	-2.634867304	0.556793995	-4.732212141	2.22E-06	1.38E-05	NA
ENSG00000105370	1.523553488	-2.638428068	0.641087786	-4.115548797	3.86E-05	0.000186665	LIM2
ENSG00000142619	1683.149417	-2.639884386	0.395875025	-6.668479236	2.58E-11	3.64E-10	PADI3
ENSG00000186831	16.88922032	-2.642312271	0.279332455	-9.459381564	3.10E-21	1.37E-19	NA
ENSG00000258602	58.49902134	-2.647592624	0.398364084	-6.64616297	3.01E-11	4.20E-10	LINC01629
ENSG00000180264	103.7376877	-2.648110785	0.3101331	-8.538626761	1.36E-17	4.11E-16	ADGRD2
ENSG00000272975	2.879086455	-2.652510264	0.405147448	-6.54702449	5.87E-11	7.87E-10	NA
ENSG00000169248	1828.417461	-2.661128183	0.323794305	-8.218576248	2.06E-16	5.49E-15	CXCL11
ENSG00000161958	126.490066	-2.662164053	0.25814883	-10.31251643	6.19E-25	3.97E-23	FGF11
ENSG00000170873	4551.995736	-2.666047621	0.203762181	-13.08411407	4.06E-39	7.83E-37	MTSS1
ENSG00000224721	5.828258782	-2.666482615	0.462551951	-5.764720288	8.18E-09	7.91E-08	LOC102724153
ENSG00000232554	1.418123289	-2.668747946	0.650114255	-4.105044498	4.04E-05	0.000194561	NA
ENSG00000125726	411.3604002	-2.675032388	0.314521366	-8.505089559	1.81E-17	5.43E-16	CD70
ENSG00000264458	2.328371674	-2.675775092	0.386495078	-6.923180247	4.42E-12	6.90E-11	NA
ENSG00000277758	19.87021659	-2.676573388	0.299398785	-8.939827157	3.90E-19	1.39E-17	LOC102724488
ENSG00000105549	22.71668731	-2.679669978	0.392718256	-6.823390405	8.89E-12	1.33E-10	THEG
ENSG00000137440	8361.268859	-2.68610464	0.320231878	-8.387998891	4.94E-17	1.41E-15	FGFBP1
ENSG00000186395	10772.11194	-2.687054905	0.276484605	-9.71864205	2.51E-22	1.27E-20	KRT10
ENSG00000241912	2.086405215	-2.689206154	0.444511329	-6.049803413	1.45E-09	1.57E-08	NA
ENSG00000267172	1.164349721	-2.69058099	0.618938586	-4.347088793	1.38E-05	7.33E-05	NA
ENSG00000261222	13.52093674	-2.694081907	0.340483265	-7.912523717	2.52E-15	5.84E-14	NA
ENSG00000179148	223.6127573	-2.698866688	0.309163459	-8.7295785	2.56E-18	8.42E-17	ALOXE3
ENSG00000198848	570.306871	-2.699114162	0.39035082	-6.914585608	4.69E-12	7.28E-11	CES1
ENSG00000136099	29.35466306	-2.699180628	0.513004251	-5.261517076	1.43E-07	1.10E-06	PCDH8
ENSG00000231645	28.6409626	-2.699323183	0.275233672	-9.80738716	1.05E-22	5.56E-21	KRT17P6
ENSG00000254519	1.473933179	-2.701172858	0.714715915	-3.779365761	0.000157228	0.000657349	LOC100507384
ENSG00000254842	14.9856573	-2.703322989	0.361498827	-7.478096152	7.54E-14	1.46E-12	NA
ENSG00000186844	0.985964415	-2.704807408	0.873085771	-3.0979859	0.001948407	0.006197291	LCE1A
ENSG00000153294	1243.648648	-2.705243454	0.260668121	-10.37811393	3.12E-25	2.08E-23	ADGRF4
ENSG00000196754	77112.81931	-2.706909932	0.270133122	-10.02065173	1.24E-23	7.13E-22	S100A2
ENSG00000183378	20.35611586	-2.709887439	0.429080011	-6.315576041	2.69E-10	3.28E-09	OVCH2
ENSG00000183674	12.83250235	-2.710547793	0.41118291	-6.59207308	4.34E-11	5.92E-10	NA
ENSG00000171056	1444.359008	-2.714332023	0.213753956	-12.6983943	6.04E-37	9.98E-35	SOX7
ENSG00000281386	5.136971924	-2.718079639	0.508537687	-5.344893227	9.05E-08	7.26E-07	NA
ENSG00000276170	478.1767548	-2.719204371	0.263458266	-10.32119588	5.65E-25	3.65E-23	LOC101929494
ENSG00000224814	1.733136446	-2.722237891	0.497296737	-5.474071493	4.40E-08	3.73E-07	NA
ENSG00000203601	5.472923752	-2.722619944	0.537590988	-5.064482118	4.10E-07	2.92E-06	LINC00970
ENSG00000267774	5.461263392	-2.724298441	0.639918526	-4.257258274	2.07E-05	0.000106207	NA
ENSG00000205116	6.999958831	-2.724452589	0.396553326	-6.870330956	6.41E-12	9.75E-11	TMEM88B
ENSG00000261730	11.27915004	-2.724581498	0.362024498	-7.525958906	5.23E-14	1.04E-12	NA
ENSG00000173335	1.538944884	-2.726242578	0.62916729	-4.33309649	1.47E-05	7.77E-05	CST9
ENSG00000198883	68.33353323	-2.727486307	0.510633177	-5.341380918	9.22E-08	7.39E-07	PNMA5
ENSG00000135346	28.33035572	-2.728701608	0.650258224	-4.196335405	2.71E-05	0.000135454	CGA
ENSG00000159337	146.2385043	-2.729492347	0.315913609	-8.639996101	5.62E-18	1.79E-16	PLA2G4D
ENSG00000213344	2.357280511	-2.733845381	0.481064379	-5.682909608	1.32E-08	1.23E-07	NA
ENSG00000182545	13.81362363	-2.733857859	0.382017913	-7.156360389	8.28E-13	1.42E-11	RNASE10
ENSG00000131668	216.1916335	-2.734592932	0.521029745	-5.248439191	1.53E-07	1.18E-06	BARX1
ENSG00000126233	296.892304	-2.741128972	0.389174603	-7.043442584	1.88E-12	3.07E-11	SLURP1
ENSG00000168703	23.35359487	-2.749799413	0.435484817	-6.314340489	2.71E-10	3.30E-09	WFDC12
ENSG00000116745	7.370292479	-2.751331222	0.561038487	-4.903997295	9.39E-07	6.27E-06	RPE65
ENSG00000128713	417.2220992	-2.752381922	0.25913811	-10.62129349	2.37E-26	1.72E-24	HOXD11
ENSG00000105889	256.7481908	-2.752640545	0.270023034	-10.19409532	2.11E-24	1.29E-22	STEAP1B
ENSG00000149021	193.6285086	-2.759201216	0.521415492	-5.291751505	1.21E-07	9.49E-07	SCGB1A1
ENSG00000215875	7.192604731	-2.762881876	0.391292552	-7.060910972	1.65E-12	2.72E-11	NA
ENSG00000278518	17.38278556	-2.767048018	0.419959728	-6.588841349	4.43E-11	6.04E-10	NA
ENSG00000158786	216.8725469	-2.768608632	0.386998934	-7.154047187	8.43E-13	1.44E-11	PLA2G2F
ENSG00000166183	631.1864667	-2.769693835	0.304751226	-9.088376346	1.01E-19	3.82E-18	ASPG
ENSG00000260115	1.522563797	-2.770331985	0.704363112	-3.933102032	8.39E-05	0.000374744	NA
ENSG00000180316	33.76087865	-2.773161779	0.313165281	-8.855265732	8.35E-19	2.90E-17	PNPLA1
ENSG00000079393	13.71018174	-2.776699107	0.322711595	-8.604274373	7.68E-18	2.41E-16	DUSP13
ENSG00000249116	34.49136725	-2.778687324	0.448913888	-6.189800312	6.02E-10	6.97E-09	NA
ENSG00000253374	9.408578488	-2.779574869	0.40421348	-6.876502157	6.13E-12	9.35E-11	NA
ENSG00000183269	1.52836393	-2.779719764	0.923154114	-3.011111279	0.002602934	0.007986123	OR52E8
ENSG00000279739	2.15434198	-2.791434299	0.547543886	-5.09810149	3.43E-07	2.48E-06	NA
ENSG00000143369	6683.788879	-2.791826605	0.244654812	-11.41128834	3.67E-30	3.76E-28	ECM1
ENSG00000159648	57.07799671	-2.796173497	0.331336496	-8.439074863	3.20E-17	9.33E-16	TEPP
ENSG00000249199	2.388447094	-2.800027787	0.712516312	-3.929773592	8.50E-05	0.000379363	NA
ENSG00000112238	57.32787755	-2.801123322	0.42938216	-6.523613652	6.86E-11	9.10E-10	PRDM13
ENSG00000136689	9851.877808	-2.807522901	0.235460521	-11.92353986	8.92E-33	1.10E-30	IL1RN
ENSG00000173805	692.6349632	-2.808508919	0.272056486	-10.32325663	5.53E-25	3.58E-23	HAP1
ENSG00000212658	1.760576456	-2.808553092	0.439006365	-6.397522494	1.58E-10	1.98E-09	KRTAP29-1
ENSG00000171360	5.407706424	-2.809111696	0.600777585	-4.675793113	2.93E-06	1.77E-05	KRT38
ENSG00000227094	2.144330931	-2.810906708	0.592013133	-4.748047891	2.05E-06	1.29E-05	NA
ENSG00000275612	3.086799375	-2.812140212	0.562273127	-5.001377581	5.69E-07	3.95E-06	NA
ENSG00000259306	18.96383553	-2.81356975	0.301168245	-9.342185962	9.44E-21	3.98E-19	NA
ENSG00000258932	1.577639765	-2.814394202	0.80765485	-3.484649665	0.000492782	0.001834204	LOC728755
ENSG00000153923	36.62796319	-2.817221379	0.329669084	-8.545603817	1.28E-17	3.88E-16	CLCA3P
ENSG00000273760	260.5831032	-2.81923301	0.312603809	-9.018549766	1.91E-19	6.94E-18	NA
ENSG00000161850	2.019638274	-2.819694779	0.417703674	-6.75046679	1.47E-11	2.13E-10	KRT82
ENSG00000256151	1.579279511	-2.822419509	0.866924589	-3.255669	0.001131255	0.003838412	NA
ENSG00000174450	9.717533344	-2.824061356	0.526228545	-5.366606165	8.02E-08	6.49E-07	GOLGA6L2
ENSG00000065618	14435.09328	-2.834055819	0.339859945	-8.338893305	7.50E-17	2.10E-15	COL17A1
ENSG00000249816	62.60872068	-2.836204549	0.35688993	-7.947000764	1.91E-15	4.49E-14	LINC00964
ENSG00000158874	7.498087918	-2.840336457	0.604637612	-4.697584799	2.63E-06	1.61E-05	APOA2
ENSG00000269729	9.330831425	-2.840872726	0.516355174	-5.501780304	3.76E-08	3.23E-07	NA
ENSG00000172243	1246.084982	-2.844657227	0.253602633	-11.21698618	3.37E-29	3.19E-27	CLEC7A
ENSG00000267733	27.75088837	-2.845111071	0.263234447	-10.80827795	3.15E-27	2.51E-25	NA
ENSG00000250320	25.50062159	-2.845353137	0.343898216	-8.27382349	1.30E-16	3.54E-15	NA
ENSG00000204866	132.1499849	-2.848175318	0.347458006	-8.197178555	2.46E-16	6.49E-15	IGFL2
ENSG00000250546	9.468886969	-2.851216724	0.732883052	-3.890411596	0.000100074	0.000439253	LOC101928978
ENSG00000259881	55.41046846	-2.854048716	0.282119304	-10.11646023	4.67E-24	2.79E-22	LOC101927793
ENSG00000277332	1.29890232	-2.855511609	0.953895092	-2.993527939	0.002757723	0.008405744	LOC101928087
ENSG00000224963	9.454054362	-2.856156255	0.353268602	-8.084942286	6.22E-16	1.56E-14	NA
ENSG00000075673	91.1160222	-2.856478302	0.439440121	-6.500267415	8.02E-11	1.05E-09	ATP12A
ENSG00000259791	1.197475024	-2.860852566	0.767655027	-3.726742435	0.00019397	0.000795098	NA
ENSG00000232230	2.534710759	-2.869274794	0.717455109	-3.999239479	6.35E-05	0.000292899	NA
ENSG00000235126	6.777458563	-2.875368723	0.441374667	-6.5145758	7.29E-11	9.62E-10	NA
ENSG00000256001	6.425151557	-2.876542471	0.482555699	-5.961057924	2.51E-09	2.61E-08	LOC107984450
ENSG00000236427	3.427649514	-2.877455134	0.406247642	-7.083007601	1.41E-12	2.35E-11	NA
ENSG00000188624	21.82624462	-2.877809226	0.508828633	-5.65575331	1.55E-08	1.43E-07	IGFL3
ENSG00000170484	26.72818649	-2.88655319	0.302738862	-9.534795656	1.50E-21	6.91E-20	KRT74
ENSG00000141639	157.6101067	-2.887807092	0.477359948	-6.049537889	1.45E-09	1.57E-08	MAPK4
ENSG00000179477	384.1841199	-2.889303613	0.365523105	-7.90457175	2.69E-15	6.20E-14	ALOX12B
ENSG00000205186	1.723654172	-2.889932702	0.547959551	-5.273989106	1.33E-07	1.04E-06	FABP9
ENSG00000279717	4.111112994	-2.89407077	0.59991646	-4.824122959	1.41E-06	9.09E-06	NA
ENSG00000224984	41.76558481	-2.897186952	0.269391223	-10.75457068	5.64E-27	4.37E-25	NA
ENSG00000253394	2.934665222	-2.900342141	0.626587706	-4.628788779	3.68E-06	2.19E-05	LINC00534
ENSG00000232855	60.24195853	-2.905671171	0.317386904	-9.154981294	5.44E-20	2.12E-18	NA
ENSG00000223812	7.642246554	-2.906454718	0.745091607	-3.900801851	9.59E-05	0.000422381	NA
ENSG00000275312	1.404580607	-2.909864895	0.793221349	-3.66841475	0.000244059	0.000975315	NA
ENSG00000230943	83.03807382	-2.910341918	0.234030748	-12.43572454	1.67E-35	2.50E-33	LINC02541
ENSG00000227717	1.237973848	-2.910537444	0.88081521	-3.304367831	0.000951908	0.00329435	LOC100132202
ENSG00000233125	15.86294302	-2.91857283	0.446554004	-6.535766792	6.33E-11	8.43E-10	ACTBP12
ENSG00000236961	1.926414786	-2.918904093	0.46905893	-6.222894201	4.88E-10	5.73E-09	NA
ENSG00000229618	14.18242527	-2.919084248	0.420325094	-6.94482507	3.79E-12	5.99E-11	NA
ENSG00000248874	6.371843471	-2.921579107	0.641488337	-4.554376029	5.25E-06	3.05E-05	C5orf17
ENSG00000163141	1357.064345	-2.924321272	0.275297848	-10.62239061	2.34E-26	1.70E-24	BNIPL
ENSG00000249731	2.088994051	-2.924384908	0.569966008	-5.130805812	2.89E-07	2.11E-06	NA
ENSG00000019549	2011.328645	-2.92446264	0.192201496	-15.21560809	2.79E-52	1.28E-49	SNAI2
ENSG00000235268	1.85524572	-2.924713507	0.569728834	-5.133518501	2.84E-07	2.08E-06	KDM4E
ENSG00000274209	4.610113858	-2.929168612	0.491719228	-5.956994253	2.57E-09	2.68E-08	ANTXRL
ENSG00000241294	265.9077268	-2.929173331	0.365312175	-8.018274583	1.07E-15	2.61E-14	IGKV2-24
ENSG00000057149	20927.09632	-2.930519177	0.32473961	-9.024212271	1.81E-19	6.65E-18	SERPINB3
ENSG00000213148	1.527918876	-2.932537579	0.450018334	-6.516484683	7.20E-11	9.52E-10	NA
ENSG00000101204	7.588329719	-2.933931685	0.531536255	-5.519720725	3.40E-08	2.94E-07	CHRNA4
ENSG00000147465	51.97960743	-2.934771139	0.293398191	-10.00268997	1.48E-23	8.48E-22	STAR
ENSG00000064300	1220.783261	-2.935273072	0.305493831	-9.608289176	7.38E-22	3.51E-20	NGFR
ENSG00000254283	1.85396755	-2.936593263	0.8781951	-3.343896205	0.000826106	0.00290386	NA
ENSG00000189410	212.8122717	-2.936929583	0.320484409	-9.164032647	5.00E-20	1.96E-18	SH2D5
ENSG00000204296	7.240461852	-2.940840181	0.528076198	-5.568969382	2.56E-08	2.28E-07	TSBP1
ENSG00000167656	36097.3123	-2.942198643	0.326258233	-9.018005811	1.92E-19	6.97E-18	LY6D
ENSG00000227012	2.478599324	-2.944310748	0.683672402	-4.306610506	1.66E-05	8.67E-05	NA
ENSG00000158055	2774.3969	-2.944613636	0.241044849	-12.21604051	2.55E-34	3.53E-32	GRHL3
ENSG00000142973	1523.942733	-2.945210818	0.372867309	-7.898817474	2.82E-15	6.48E-14	CYP4B1
ENSG00000130822	556.9622958	-2.949724153	0.298785564	-9.872378408	5.48E-23	3.00E-21	PNCK
ENSG00000234859	9.761332092	-2.958572036	0.394965929	-7.490701902	6.85E-14	1.33E-12	LOC100505782
ENSG00000198768	127.5376842	-2.960587855	0.35571569	-8.322904895	8.58E-17	2.39E-15	APCDD1L
ENSG00000182040	257.3092478	-2.961606956	0.288241772	-10.274732	9.16E-25	5.83E-23	USH1G
ENSG00000255325	15.77240704	-2.963879324	0.310548293	-9.544020646	1.37E-21	6.36E-20	NA
ENSG00000272311	1.536073754	-2.969508955	0.781864205	-3.797985555	0.000145877	0.000615075	IFNL4P1
ENSG00000258535	4.783024177	-2.971358813	0.412502581	-7.203249029	5.88E-13	1.03E-11	NA
ENSG00000249367	1.692715052	-2.973419857	0.431374396	-6.892898341	5.47E-12	8.41E-11	NA
ENSG00000140955	67.0548275	-2.976773873	0.254354432	-11.70325146	1.23E-31	1.44E-29	ADAD2
ENSG00000141485	234.6900022	-2.982617352	0.379722281	-7.85473359	4.01E-15	9.03E-14	SLC13A5
ENSG00000228295	17.83363964	-2.98867269	0.722079713	-4.138978893	3.49E-05	0.000170618	NA
ENSG00000162723	60.5136465	-2.991286486	0.331569951	-9.021584968	1.85E-19	6.78E-18	SLAMF9
ENSG00000249102	1.325160109	-2.994862626	0.588286938	-5.090819514	3.57E-07	2.57E-06	NA
ENSG00000006606	34.7173407	-2.996475387	0.291937691	-10.26409222	1.02E-24	6.46E-23	CCL26
ENSG00000187180	1.264425248	-2.998004642	0.912290466	-3.286239147	0.001015348	0.003488939	LCE2C
ENSG00000198765	2.704331254	-2.998800853	0.761957584	-3.935653264	8.30E-05	0.000371251	SYCP1
ENSG00000265182	3.224564452	-2.999204018	0.603900421	-4.966388358	6.82E-07	4.67E-06	SRP72P1
ENSG00000256847	1.20925272	-3.001020646	0.576623412	-5.204472425	1.95E-07	1.47E-06	NA
ENSG00000227725	19.91229972	-3.002671396	0.311139848	-9.650552352	4.89E-22	2.38E-20	NA
ENSG00000268879	53.43404347	-3.01205967	0.387094	-7.781209909	7.18E-15	1.57E-13	NA
ENSG00000166118	1.408264722	-3.013651069	0.682246879	-4.417244197	1.00E-05	5.46E-05	SPATA19
ENSG00000197632	2354.021194	-3.017102002	0.343401	-8.785944133	1.55E-18	5.22E-17	SERPINB2
ENSG00000278531	1.519670865	-3.024772042	0.698527599	-4.330211215	1.49E-05	7.86E-05	NA
ENSG00000069812	5019.966925	-3.028477943	0.250863329	-12.07222257	1.48E-33	1.95E-31	HES2
ENSG00000188029	1.477401402	-3.031014637	0.604724525	-5.012223765	5.38E-07	3.75E-06	CTSL3P
ENSG00000135903	4.016519175	-3.032652435	0.606681193	-4.998757949	5.77E-07	4.00E-06	PAX3
ENSG00000243321	1.538779742	-3.03513455	0.754512804	-4.022641541	5.75E-05	0.000267822	LINC01998
ENSG00000146839	14.92639043	-3.038846459	0.368935649	-8.23679269	1.77E-16	4.75E-15	ZAN
ENSG00000235899	21.39241196	-3.041804019	0.346531328	-8.777861561	1.67E-18	5.60E-17	LINC01564
ENSG00000246876	2.558735748	-3.045546272	0.967857633	-3.146688282	0.001651309	0.005351798	LINC02466
ENSG00000257042	16.5685119	-3.052931085	0.381337771	-8.005844995	1.19E-15	2.87E-14	NA
ENSG00000254651	2.505978142	-3.056284792	0.560906329	-5.44883278	5.07E-08	4.26E-07	NA
ENSG00000175793	111735.5079	-3.056467246	0.187274312	-16.32080348	7.02E-60	5.19E-57	SFN
ENSG00000229925	1.433901887	-3.061376785	0.576489628	-5.310376171	1.09E-07	8.65E-07	NA
ENSG00000244128	7.676510139	-3.063927091	0.689608046	-4.442997887	8.87E-06	4.90E-05	NA
ENSG00000260746	1.430934382	-3.063978219	0.713970734	-4.291461922	1.78E-05	9.23E-05	NA
ENSG00000279036	14.70137311	-3.070118378	0.405174557	-7.57727337	3.53E-14	7.11E-13	NA
ENSG00000251676	1.871834232	-3.077644696	1.021780832	-3.012039959	0.002594984	0.007963602	SNHG27
ENSG00000104140	8402.55376	-3.082696114	0.195277749	-15.78621289	3.87E-56	2.23E-53	RHOV
ENSG00000214711	532.1971021	-3.086205416	0.363425698	-8.491984558	2.03E-17	6.04E-16	CAPN14
ENSG00000204941	14.96395884	-3.086261899	0.442787563	-6.97007359	3.17E-12	5.05E-11	PSG5
ENSG00000146147	80.92235891	-3.087206642	0.285374092	-10.81810414	2.83E-27	2.26E-25	MLIP
ENSG00000102313	11.14665509	-3.088036011	0.352279838	-8.765860766	1.85E-18	6.18E-17	ITIH6
ENSG00000172382	1227.614663	-3.089147512	0.270083204	-11.43776238	2.71E-30	2.82E-28	PRSS27
ENSG00000070729	187.7088536	-3.092638459	0.33948229	-9.109866835	8.25E-20	3.16E-18	CNGB1
ENSG00000163206	2.006621122	-3.095996989	0.605136246	-5.116198227	3.12E-07	2.27E-06	SMCP
ENSG00000161849	10.44953461	-3.09995481	0.3984167	-7.780684913	7.21E-15	1.57E-13	KRT84
ENSG00000237548	15.34390372	-3.102034267	0.325176468	-9.539541045	1.43E-21	6.62E-20	NA
ENSG00000131183	24.03424176	-3.103824514	0.285033678	-10.88932555	1.30E-27	1.07E-25	SLC34A1
ENSG00000258121	3.108325405	-3.112597059	0.448959951	-6.93290583	4.12E-12	6.48E-11	NA
ENSG00000214842	29.56097043	-3.114343892	0.295402179	-10.54272485	5.49E-26	3.85E-24	RAD51AP2
ENSG00000203722	381.2520943	-3.117206029	0.258057913	-12.07948242	1.36E-33	1.79E-31	RAET1G
ENSG00000261520	21.38680647	-3.124602144	0.676664589	-4.617652816	3.88E-06	2.30E-05	DLGAP1-AS5
ENSG00000171346	65721.89411	-3.138333931	0.339515437	-9.243567701	2.38E-20	9.64E-19	KRT15
ENSG00000183287	264.4262581	-3.149469835	0.395832816	-7.956565765	1.77E-15	4.18E-14	CCBE1
ENSG00000224079	20.23491862	-3.15204974	0.32371606	-9.737081745	2.09E-22	1.07E-20	NA
ENSG00000183760	133.3638538	-3.156318609	0.351207755	-8.987041334	2.54E-19	9.16E-18	ACP7
ENSG00000119714	1468.346559	-3.158075093	0.218353614	-14.46312264	2.07E-47	7.12E-45	GPR68
ENSG00000259946	1.673136685	-3.158207412	0.649617547	-4.861641172	1.16E-06	7.64E-06	NA
ENSG00000094963	141.5407927	-3.160693548	0.337715878	-9.359031526	8.05E-21	3.43E-19	FMO2
ENSG00000277883	22.79719114	-3.161275728	0.322461024	-9.803590163	1.09E-22	5.75E-21	NA
ENSG00000165794	427.9867232	-3.162198975	0.323490875	-9.775233917	1.44E-22	7.47E-21	SLC39A2
ENSG00000253408	25.33466002	-3.162295312	0.234909941	-13.46173473	2.63E-41	5.75E-39	NA
ENSG00000255364	12.87133727	-3.163528657	0.338438727	-9.347419204	8.98E-21	3.80E-19	NA
ENSG00000271996	16.54719423	-3.167350541	0.429318084	-7.377631316	1.61E-13	3.01E-12	NA
ENSG00000256518	3.666843084	-3.170123031	0.742521459	-4.269402575	1.96E-05	0.000101063	NA
ENSG00000234352	13.20094401	-3.170689916	0.680490681	-4.659417099	3.17E-06	1.91E-05	LOC349160
ENSG00000171403	109.4127839	-3.183588662	0.271906448	-11.70839706	1.15E-31	1.37E-29	KRT9
ENSG00000214897	6.606972522	-3.186655625	0.740024014	-4.306151644	1.66E-05	8.69E-05	PNMA6E
ENSG00000215127	1.795671268	-3.189094686	0.522953146	-6.098241707	1.07E-09	1.19E-08	NA
ENSG00000198670	22.93413501	-3.1984536	0.406772493	-7.863003666	3.75E-15	8.49E-14	LPA
ENSG00000123407	31.26991877	-3.202733553	0.64732161	-4.947669754	7.51E-07	5.10E-06	HOXC12
ENSG00000228789	26.92598348	-3.204968069	0.450850197	-7.10872057	1.17E-12	1.97E-11	HCG22
ENSG00000141579	3978.244236	-3.20841236	0.250852933	-12.79001334	1.86E-37	3.23E-35	ZNF750
ENSG00000087494	2731.476557	-3.208589502	0.31999574	-10.02697569	1.16E-23	6.70E-22	PTHLH
ENSG00000186526	32.79172851	-3.218378586	0.433424259	-7.42546944	1.12E-13	2.14E-12	CYP4F8
ENSG00000261706	13.5834036	-3.220868745	0.589195729	-5.466551418	4.59E-08	3.88E-07	NA
ENSG00000259446	1.692448714	-3.233871252	0.814966354	-3.968104002	7.24E-05	0.000328893	RYR3-DT
ENSG00000236996	15.4658613	-3.237601318	0.31940001	-10.13650976	3.80E-24	2.29E-22	MLIP-IT1
ENSG00000185614	545.2072248	-3.240408781	0.189039479	-17.14143947	7.28E-66	7.51E-63	INKA1
ENSG00000221882	2.700679583	-3.243297554	0.78974142	-4.106784158	4.01E-05	0.000193316	OR3A2
ENSG00000164520	389.8547079	-3.244805835	0.252382609	-12.85669346	7.89E-38	1.41E-35	RAET1E
ENSG00000229586	2.282763467	-3.244917216	0.523895106	-6.193829984	5.87E-10	6.82E-09	TNPO1P3
ENSG00000258711	71.09532086	-3.246280285	0.21926078	-14.80556755	1.35E-49	5.31E-47	NA
ENSG00000172551	68.64396134	-3.252240596	0.491153412	-6.621639015	3.55E-11	4.91E-10	MUCL1
ENSG00000169676	10.32738897	-3.252515074	0.486395275	-6.686979168	2.28E-11	3.23E-10	DRD5
ENSG00000263745	53.52271769	-3.25305109	0.31352986	-10.37557025	3.20E-25	2.13E-23	NA
ENSG00000253357	1.789313866	-3.254554472	0.852347074	-3.81834416	0.00013435	0.000571146	NA
[truncated: 425 more rows]
