# Supplementary material for: Molecular Differences between Squamous Cell Carcinoma and Adenocarcinoma Cervical Cancer Subtypes: Potential Prognostic Biomarkers
Source: Curr Oncol. 2022 Jul 5;29(7):4689–702. doi: 10.3390/curroncol29070372 (PMC9322365; doi:10.3390/curroncol29070372)
Supplement: Supplementary file 1 [file curroncol-29-00372-s001.zip › Table_S4.xlsx]

## Sheet: Hoja1
Table S4. Differential expressed genes between the two histological types in Mexican-mestizo cohort (GSE56303)
GeneReport	SYMBOL	logFC	adj P-value
AK096009	HNF1A-AS1	5.29593	8.15e-06
BC025790	SPINK1	4.20199	1.12e-06
NM_024526	EPS8L3	3.97161	2.39e-08
NM_006017	PROM1	3.92697	5.12e-05
NM_003963	TM4SF5	3.86131	2.08e-07
NM_133181	EPS8L3	3.85714	4.66e-07
NM_033049	MUC13	3.82933	3.09e-06
NM_000166	GJB1	3.80093	0.000188786
BC016057	USH1C	3.77235	1.87e-08
NM_152311	CLRN3	3.75004	3.24e-07
NM_000187	HGD	3.72602	8.32e-07
XM_926137	NA	3.70135	5.63e-06
NM_001008748	MGAM2	3.66264	6.28e-06
BC071757	HGD	3.62607	6.3e-06
AK131337	NA	3.57325	6.74e-05
BC002805	GJB1	3.50242	0.000300369
NM_004616	TSPAN8	3.48325	7.66e-05
NM_000716	C4BPB	3.47168	0.000234524
CR749600	GP2	3.43395	0.0005119
AF146796	SLC34A2	3.34432	0.00100608
NM_000047	ARSL	3.31181	6.21e-06
BC022895	MS4A8	3.26308	0.000460567
NM_005495	SLC17A4	3.26152	0.00133845
XM_294353	NA	3.26005	0.000966597
NM_178850	HNF4A	3.25311	1.2e-06
BC109208	SLC17A4	3.24187	0.000858359
BC104802	PCDHA9	3.21962	7.13e-05
BC017859	TFF3	3.21826	0.00228233
XM_934519	NA	3.2072	4.13e-05
BC031412	HABP2	3.1761	3.18e-06
NM_001017364	C4BPB	3.16597	0.000961071
X87870	HNF4A	3.15476	5.31e-07
NM_007127	VIL1	3.13368	2.61e-06
NM_032192	PPP1R1B	3.12266	4.55e-05
NM_006424	SLC34A2	3.11501	0.00253047
NM_000209	PDX1	3.10462	0.000145571
BC017303	VIL1	3.10408	1.89e-06
NM_000035	ALDOB	3.08131	0.000206887
NM_181505	PPP1R1B	3.07853	3.51e-05
X87871	HNF4A	3.07387	1.11e-07
NM_004212	SLC28A2	3.07183	0.000446907
NM_014289	CAPN6	3.05193	0.000349168
BC051880	RNF186	3.04255	1.16e-06
BC112013	CDH17	3.0378	5.68e-06
NM_001030004	HNF4A	3.03515	3.34e-05
NM_000457	HNF4A	3.02582	0.00214592
NM_021871	FGA	3.02411	0.00117388
NM_000492	CFTR	3.02103	0.000692077
BC010920	CLDN10	3.01205	0.00521763
NM_004063	CDH17	2.98971	6.39e-05
BC027895	REG1B	2.98671	0.0132641
BC069744	CA8	2.9593	0.000806234
BC032693	GP2	2.93855	0.00373427
NM_024727	LRRC31	2.91745	9.67e-05
XM_371933	NA	2.90699	0.000703419
AF039699	USH1C	2.90299	5.58e-07
AF157492	SLC4A4	2.89078	0.00304285
NM_017717	CDHR5	2.87113	3.99e-05
NM_005709	USH1C	2.84553	1.47e-07
NM_213599	ANO5	2.81739	0.000333524
NM_001030003	HNF4A	2.80397	4.38e-06
NM_002909	REG1A	2.80317	0.0116
NM_001029996	CFAP221	2.80129	1.58e-05
NM_207361	FREM2	2.7966	0.000299125
NM_001031839	C8orf49	2.7846	0.0052989
NM_001898	CST1	2.76798	0.000834883
BC030977	SLC4A4	2.76646	0.000172043
BC099705	GABRB2	2.75939	8.02e-06
BC110494	PIGR	2.75848	0.017838
NM_001007240	GP2	2.75833	0.00635152
NM_006507	REG1B	2.75705	0.0142815
AK091409	NA	2.75173	1.33e-05
DQ023513	SLC3A1	2.74903	0.000348925
NM_152637	METTL7B	2.73988	1.21e-05
BC005350	REG1A	2.73427	0.0166774
BC001386	TM4SF4	2.72605	0.00136314
BC010923	ALX1	2.70997	0.00515078
NM_004056	CA8	2.69175	0.00247404
NM_002644	PIGR	2.68933	0.00991198
NM_003122	SPINK1	2.66729	2.42e-05
BC057999	VEPH1	2.66218	0.00062455
AK096973	HNF4A	2.65129	0.000111431
NM_006418	OLFM4	2.64632	0.00285788
BC035615	MYO7B	2.64515	3.31e-07
BC032811	TFF1	2.63853	0.00444131
BC050704	DCDC2	2.62446	0.00138458
XM_039877	NA	2.62087	0.0143421
BC059387	MYO1A	2.61708	7.16e-05
NM_148964	CTSE	2.61467	0.00132517
NM_006215	SERPINA4	2.60082	9.29e-05
NM_004406	DMBT1	2.58102	0.0101978
NM_054024	MIA2	2.57735	0.00040003
NM_176813	AGR3	2.55627	0.000613324
BC069477	MUCL3	2.54711	0.00225769
AK024943	USH1C	2.54041	9.82e-06
AK022610	PLCH1	2.53525	0.000496906
NM_000813	GABRB2	2.53213	5.81e-05
BC106760	FGB	2.5275	0.00738803
NM_001010848	NRG3	2.5258	0.00503242
NM_001017435	CT45A3	2.50857	0.020115
NM_017700	ARHGEF38	2.50842	0.00211014
NM_019844	SLCO1B3	2.50464	0.000466367
NM_001306	CLDN3	2.48906	0.000772295
NM_001899	CST4	2.48702	0.00197342
BC033735	PCDHA5	2.48599	0.000258769
NM_024320	PRR15L	2.47283	3.53e-06
BC108929	CA8	2.46776	0.00143529
BC020764	FGA	2.46157	0.00714823
NM_033197	BPIFB1	2.46014	0.0319756
NM_000715	C4BPA	2.45895	0.00554411
NM_001011547	SLC5A9	2.45839	0.00474728
NM_016730	FOLR1	2.45285	0.00719756
XM_928945	NA	2.45243	0.00199234
XM_933280	NA	2.44931	0.00104056
NM_007072	HHLA2	2.44925	0.0012636
BC011780	FOXA2	2.44563	3.5e-05
NM_000446	PON1	2.44423	0.000860379
XM_495860	NA	2.44406	0.00288171
BC000336	SCGN	2.43395	0.00137919
U93553	NR5A2	2.42238	0.000448822
NM_080736	WFDC2	2.42158	0.0112072
XM_168578	NA	2.41908	0.000377609
NM_000458	HNF1B	2.41575	0.00825434
BC021276	IGHD	2.41568	0.00322843
BC074719	PON1	2.41196	3.6e-07
NM_000130	F5	2.40941	4.33e-05
NM_145740	GSTA1	2.40791	0.0189101
AY442326	NA	2.40595	0.000331274
NM_004497	FOXA3	2.40115	0.00125731
NM_138932	A1CF	2.39882	0.00426078
BC032946	AQP5	2.38567	0.0223861
NM_001910	CTSE	2.3841	0.000506893
NM_001012714	PRR26	2.38274	3.91e-07
NM_000846	GSTA2	2.374	0.0225731
XM_930384	NA	2.37364	0.0450102
XM_049037	NA	2.37164	0.000722156
NM_031852	PCDHA7	2.36192	4.25e-05
XM_926888	NA	2.35487	0.0147522
BC069692	FGF9	2.35477	0.00757279
NM_004525	LRP2	2.34604	0.00152601
NM_006998	SCGN	2.34248	0.00283018
NM_004861	GAL3ST1	2.33407	3.44e-05
NM_001017438	CT45A6	2.33317	0.0321743
NM_016192	TMEFF2	2.33005	4.32e-05
BC025311	HHIP	2.32893	4.19e-05
AJ236921	GRM8	2.32528	0.00332186
NM_003759	SLC4A4	2.31479	0.00465492
NM_170693	SGK2	2.31367	8.49e-05
NM_153228	ANKFN1	2.31361	0.0168682
NM_001041	SI	2.30342	0.000374192
BC050733	ABCC6	2.30064	0.00230045
AJ409094	FAM3B	2.29061	0.0335091
NM_002010	FGF9	2.26281	0.0165979
XM_929580	NA	2.2579	0.00207689
XM_378783	NA	2.25127	0.0125269
BC027912	CDH16	2.25083	0.000173352
NM_024791	PDZD3	2.25042	0.00013832
BC014093	AOC1	2.24094	0.00127792
BC110891	GSTA1	2.23587	0.03248
NM_001012993	C9orf152	2.23281	0.00255188
NM_031264	CDHR5	2.21354	5.19e-05
BC057829	FAM3B	2.20629	0.0363148
NM_001322	CST2	2.20554	0.00029191
BC041789	ALB	2.20312	0.000742632
NM_031882	PCDHAC1	2.19876	0.000106458
BC053369	EPPIN	2.19597	0.00915274
XM_932161	NA	2.19501	0.00279646
NM_203429	DSCR8	2.19411	0.0118882
NM_152389	CFAP65	2.1933	0.00853012
NM_006481	HNF1B	2.19219	0.000681508
BC063404	RNF128	2.18269	0.0106354
BC070246	FGA	2.18201	0.0129334
NM_000624	SERPINA5	2.18024	0.00266731
NM_002630	PGC	2.1736	0.00287711
NM_000802	FOLR1	2.16516	0.0112229
AY078405	ABCC6	2.16186	0.0012799
NM_033266	ERN2	2.15867	0.00353235
BC020768	OR51E2	2.15858	0.0153178
XM_933918	NA	2.15815	0.000283363
NM_003657	BCAS1	2.15779	0.0120049
NM_080658	ACY3	2.15754	6.38e-05
XM_932643	NA	2.15124	0.000850375
NM_001004052	OR52B2	2.15109	0.01649
NM_005141	FGB	2.148	0.0138788
BC105009	HNF4G	2.1429	0.00359832
NM_001056	SULT1C2	2.14276	0.00195054
NM_001012509	SLC45A2	2.14219	0.0302263
NM_022475	HHIP	2.14014	0.00035671
NM_021200	PLEKHB1	2.13812	0.000524392
BC075069	UGT8	2.13056	0.0116247
NM_014996	PLCH1	2.1302	0.000976731
NM_152488	NBPF4	2.12794	0.026115
BC029399	ALDOB	2.12594	0.0042003
NM_016729	FOLR1	2.11864	0.0130342
NM_002867	RAB3B	2.11804	0.00489656
NM_032794	NA	2.11619	0.00317997
NM_012391	SPDEF	2.11599	0.00684623
AK091777	LONRF3	2.11588	0.000969802
BC104908	HNF1A	2.11232	4.45e-05
BC028357	CLGN	2.10742	0.00636981
CR606086	NA	2.10737	0.00547144
NM_000905	NPY	2.1044	0.00308883
NM_152459	C16orf89	2.10369	0.000489917
NM_016724	FOLR1	2.10195	0.0134078
NM_024850	BTNL8	2.1013	0.013714
NM_005423	TFF2	2.09816	8.97e-05
AF426267	B3GALT5-AS1	2.09534	0.012604
BC009499	STXBP6	2.09324	0.00117668
XM_927883	NA	2.09267	0.0212475
NM_002763	PROX1	2.08912	0.00525761
NM_025257	SLC44A4	2.08896	0.00250337
XM_376334	NA	2.08696	0.000496233
NM_016725	FOLR1	2.08382	0.0163598
NM_002181	IHH	2.0836	0.000384381
BC101825	TAAR1	2.08287	0.0245673
NM_001633	AMBP	2.08266	0.000777197
NM_032044	REG4	2.08043	0.0157001
BC113866	SLC26A7	2.07837	0.0251616
BC036365	PLEKHS1	2.07707	0.00870331
NM_022308	ICA1	2.07519	0.000105807
BC021682	GLYATL2	2.07185	0.0236622
NM_018898	PCDHAC1	2.07158	0.00179996
NM_001009562	SLCO1B7	2.07026	0.00612489
NM_030906	STK33	2.06612	0.000511445
AJ306840	DSCR8	2.06144	0.0145966
BC008640	ICA1	2.06022	0.000128503
NM_024889	PLEKHS1	2.0578	0.0246916
BC060765	MCOLN3	2.05562	0.00270873
NM_025227	BPIFB2	2.05469	0.0012272
NM_024902	DNAJC22	2.05261	0.000603815
BC104776	PCDHAC2	2.05108	6.39e-05
NM_006103	WFDC2	2.0504	0.0201677
BC031616	NXF3	2.04086	0.0149127
AJ783421	DSCR8	2.04073	0.0188645
AY987010	SGK2	2.04039	5.19e-05
NM_001035223	RGL3	2.03975	0.000862734
NM_145007	NLRP11	2.03954	0.0101851
NM_001091	AOC1	2.03653	0.00214032
BX248780	SSTR1	2.03571	0.000716169
XM_931558	NA	2.03563	0.0116619
BC050659	PEG10	2.03149	0.00799871
NM_147203	FGL1	2.0287	0.00120924
NM_017809	NXF2	2.02697	0.00314769
NM_006061	CRISP3	2.02176	0.032104
NM_020208	SLC6A20	2.01877	0.00359776
NM_024574	NDNF	2.01556	0.000388753
NM_133430	XAGE1B	2.00946	0.0164056
BC109279	DNAJC6	2.00809	0.0022267
NM_006057	B3GALT5	2.00781	0.00913939
NM_058186	FAM3B	2.00568	0.045393
XM_929881	NA	2.00196	0.00649919
AY358138	LRRC31	1.99804	0.00010889
NM_005769	CHST4	1.99779	0.010454
NM_006210	PEG3	1.99321	0.00479424
XM_927359	NA	1.99163	0.00935947
NM_014934	DZIP1	1.99128	0.00331111
BC021299	SPDEF	1.98258	0.00933678
NM_014576	A1CF	1.98127	0.00902375
BC042578	PGC	1.98068	0.00310603
BX648228	MIA2	1.98045	3e-05
XM_496597	NA	1.97924	0.0498196
NM_032257	ZMYND12	1.9784	0.00251209
NM_003888	ALDH1A2	1.97629	0.00559926
XM_927430	NA	1.97452	0.013311
BC018054	ENPP4	1.96727	0.00288676
BC009538	XAGE1B	1.96505	0.0290053
XM_209196	NA	1.96484	0.0129416
NM_000065	C6	1.96431	0.0292427
NM_153676	USH1C	1.96422	7.13e-05
BC029353	DSCR8	1.96369	0.0283819
NM_016116	ASB4	1.96246	0.0322139
NM_000612	IGF2	1.95294	0.00217552
BC036776	REG3A	1.9516	0.045029
NM_003225	TFF1	1.94868	0.0290485
NM_032589	DSCR8	1.94818	0.0209341
NM_001888	CRYM	1.94767	0.0348124
NM_145913	SLC5A8	1.94767	0.0174751
NM_018286	TMEM100	1.94646	0.00767368
AK126354	PLEKHS1	1.9455	0.0255559
BC007047	FGL1	1.94346	0.000909725
NM_016276	SGK2	1.94269	0.000184985
NM_031883	PCDHAC2	1.94247	6.17e-06
BC017572	NECTIN3	1.94192	0.00404179
XM_934799	NA	1.94154	0.00334833
BC015503	AGR2	1.94071	0.0134509
NM_001075	UGT2B10	1.93664	0.0190228
NM_005012	ROR1	1.9348	0.00580863
NM_004751	GCNT3	1.93382	0.00112046
XM_934630	NA	1.93299	0.00641078
XM_929047	NA	1.93273	0.0161801
NM_004852	ONECUT2	1.92926	0.00392906
BC101600	WFDC6	1.92709	0.00201515
XM_379904	NA	1.92547	0.0175991
NM_024743	UGT2A3	1.92411	0.0075573
BC017714	HNF1B	1.92401	0.0392541
BC034757	IHH	1.9235	0.000337507
XM_371082	NA	1.92269	0.00453235
NM_001014444	CRYM	1.92246	0.0407391
NM_001332	CTNND2	1.91999	0.0363413
BC041374	LRRC4C	1.91692	0.017404
CR627372	LINC01913	1.91584	0.0294328
BC069680	PRKAA2	1.91576	0.00265594
XM_934610	NA	1.91274	0.00489512
NM_003716	CADPS	1.91015	0.00213807
XM_933394	NA	1.90488	0.00975717
BC107707	CRISP2	1.90418	0.00960121
NM_000508	FGA	1.90409	0.0136351
NM_000767	CYP2B6	1.90371	0.0146288
XM_928457	NA	1.90104	0.0124058
NM_202000	ACSM3	1.90052	0.00028499
NM_000679	ADRA1B	1.90025	0.00250407
NM_032405	TMPRSS3	1.90003	0.0106743
NM_018666	SAGE1	1.89924	0.0273931
NM_021784	FOXA2	1.89783	0.000570139
BC053318	IGF2	1.89636	0.00348514
AF011390	SLC4A4	1.89344	0.0160146
NM_033229	TRIM15	1.89201	0.00119536
AF118090	NA	1.89199	0.0017378
NM_019062	RNF186	1.88935	0.000669741
BC067430	CYP2B6	1.88787	0.0286593
BC010128	TMEM100	1.88723	0.00679817
BC054873	A1CF	1.8818	0.000642793
NM_024539	RNF128	1.87634	0.0197018
NM_006408	AGR2	1.87241	0.00544951
NM_002580	REG3A	1.87162	0.0355436
NM_000790	DDC	1.87151	0.00217725
NM_001037763	COL28A1	1.87064	0.0123058
NM_020398	EPPIN	1.8669	0.0374391
BC093070	ASRGL1	1.86628	0.0131755
BC112199	ERBB4	1.86537	0.0485721
BC001060	PAX8	1.86515	0.0054268
BC074846	TMPRSS3	1.8624	0.013393
NM_144575	CAPN13	1.85678	0.0207235
BC018061	CRYM	1.85383	0.0432373
NM_152478	ZNF583	1.85142	0.00614457
NM_152495	CNIH3	1.85125	0.00553737
NM_032607	CREB3L3	1.85024	0.0169354
NM_001013701	DUXAP10	1.8499	0.00600195
U94363	GYG2	1.84447	0.0021536
NM_020973	GBA3	1.84342	0.0424424
AK131567	NA	1.84279	0.0299476
BC033009	ADH1B	1.84163	0.0285605
AK093133	PIWIL1	1.84034	0.0145013
BC023152	GYG2	1.8368	0.00744814
BC096265	VNN1	1.83531	0.0105566
XM_929675	NA	1.8342	0.0105228
U11863	AOC1	1.8314	0.0065981
NM_145865	ANKS4B	1.8308	0.000303621
NM_001031705	CT55	1.82906	0.0358891
NM_001651	AQP5	1.82739	0.0200666
AK131212	TMPRSS3	1.82594	0.00928807
BC047773	BMPR1B	1.82365	0.0264145
XM_926778	NA	1.82273	0.0348364
BC103978	FGF9	1.82188	0.0372069
NM_001246	ENTPD2	1.82066	0.000856948
NM_005518	HMGCS2	1.81652	0.0497476
BC025994	SLC4A8	1.81381	0.00537732
DQ023515	SLC3A1	1.81357	0.000219463
BC109292	PWWP3B	1.81264	0.00357327
BC012859	GDA	1.8123	0.0165505
NM_014253	TENM1	1.81174	0.0244654
BC111962	KCTD16	1.80957	0.00328064
NM_005379	MYO1A	1.80471	0.0095318
NM_005674	ZNF239	1.80401	0.00250299
XM_934616	NA	1.80329	0.00175944
NM_000638	VTN	1.80253	6.95e-05
NM_005123	NR1H4	1.80237	0.00137895
NM_003558	PIP5K1B	1.80177	0.00312841
NM_024969	CSRNP3	1.80075	0.0292232
NM_173623	TTLL6	1.80005	0.00104961
BC029508	CCDC68	1.79826	0.00359125
AK026817	SPEF2	1.79775	0.00464468
BC010569	VIPR2	1.79688	0.000736232
NM_006149	LGALS4	1.79515	0.00272437
BX641145	ZNF470	1.7939	0.0355254
NM_006982	ALX1	1.79244	0.0220113
XM_376433	NA	1.79209	0.0174463
NM_003081	SNAP25	1.79003	0.00663634
NM_013954	NOX1	1.78905	0.049742
NM_001443	FABP1	1.78896	0.0180699
NM_173633	TMEM145	1.78891	0.00155282
NM_020929	LRRC4C	1.78881	0.0212417
XM_926663	NA	1.78712	0.00794541
NM_017675	CDHR2	1.78704	0.000156474
BC058010	CPS1	1.78672	0.00894881
NM_176817	TAS2R38	1.785	0.0424209
BC040177	PPM1H	1.78267	0.0121006
NM_005622	ACSM3	1.78132	0.00139055
BC047515	PNMA2	1.77756	0.00152663
BC110504	HKDC1	1.77242	0.00950553
AK128046	NA	1.77113	0.00843733
XM_926071	NA	1.76922	0.0380944
XM_496664	NA	1.76732	0.00923694
BC011786	IGF2	1.76595	0.0137533
AK128800	NA	1.76283	0.045427
BC005353	SULT1C2	1.75989	0.00475315
NM_024780	TMC5	1.75892	0.00517526
BC027602	TMC5	1.75876	0.00614233
NM_013264	DDX25	1.75872	0.0296657
AK075525	VWDE	1.7545	0.00432606
NM_152635	OIT3	1.75368	0.0138442
BC067776	NMUR2	1.75329	0.0173463
BC075040	CHRNB2	1.75316	0.0124357
BC065511	SGK2	1.75211	0.000647401
NM_017625	ITLN1	1.74996	0.0334801
NM_000066	C8B	1.74996	0.0428909
NM_052828	TRIM10	1.74583	0.00250586
DQ023516	SLC3A1	1.74522	0.00191179
XM_934617	NA	1.74473	0.00239929
NM_000613	HPX	1.74382	0.00166104
NM_032965	CCL15	1.74347	0.00121101
XM_930043	NA	1.74346	0.0226027
NM_033225	CSMD1	1.73947	0.0147306
NM_015931	SSUH2	1.73492	0.00195329
BC037870	PLEKHS1	1.73182	0.00525763
NM_000545	HNF1A	1.73022	9.76e-06
NM_031848	PCDHA6	1.7282	4.69e-05
CR603372	NA	1.7265	0.00428195
AF090116	RGS7	1.72616	0.0143877
AK125175	NA	1.72121	0.0177847
NM_020826	SYT13	1.71754	0.00225087
NM_003462	DNALI1	1.71713	0.00146022
BC113950	PLCH1	1.71658	0.0089031
BC100671	LONRF3	1.71554	0.00218051
NM_001012446	FAM221B	1.7155	0.0133608
NM_178168	OR10A5	1.71473	0.0196285
XM_929081	NA	1.71325	0.040701
NM_025080	ASRGL1	1.70771	0.0144739
XM_379029	NA	1.70642	0.015912
BC060803	CCDC170	1.70399	0.00249845
NM_015253	WSCD1	1.70126	0.030003
BC037866	SOX6	1.699	0.00674608
NM_001935	DPP4	1.69814	0.000755697
NM_004362	CLGN	1.69764	0.0141112
NM_001185	AZGP1	1.69693	0.0249805
NM_000720	CACNA1D	1.6962	0.00654055
BC026264	UGT2B4	1.69564	0.023825
BC069109	PBOV1	1.69478	0.0192251
NM_004538	NAP1L3	1.69439	0.00437083
AK097338	LRRC31	1.68938	0.00377479
NM_138424	KIF12	1.68872	0.0108218
XM_932509	NA	1.6872	0.0344044
NM_015900	PLA1A	1.6868	0.004144
BC022017	DDI1	1.6856	0.0126139
BC103842	SLC51B	1.68542	0.0069197
NM_002216	ITIH2	1.68513	0.000977099
NM_004968	ICA1	1.68488	0.00473281
XM_496145	NA	1.68369	0.0313495
NM_006841	SLC38A3	1.68286	0.00745606
NM_022129	PBLD	1.68215	0.0012557
NM_000378	WT1	1.68185	0.0127871
BC008353	GLYATL1	1.68176	0.0240282
BC033681	C16orf89	1.681	0.00401648
BC111698	SGSM1	1.68091	0.00582193
NM_173642	RIMKLA	1.6791	0.0163765
NM_145016	GLYATL2	1.67907	0.0433906
NM_014466	TEKT2	1.6788	0.0218942
AJ249210	GRIK3	1.67816	0.000877842
NM_012468	TCL6	1.67804	0.0415708
AK074614	IGF2	1.67737	0.00662377
BC031276	ATP8B5P	1.67036	0.00618805
BC026283	APOH	1.66936	0.00203719
XM_058997	NA	1.66915	0.00673851
NM_000277	PAH	1.66849	0.0368499
NM_175873	SOWAHA	1.66817	0.00334836
XM_371823	NA	1.66453	0.0273271
NM_032567	SPZ1	1.66258	0.0121082
AY358155	TMC5	1.66243	0.00204797
NM_002852	PTX3	1.66213	0.0139662
NM_030630	HID1	1.66022	0.00259795
NM_005355	KIF25	1.65943	0.00603482
NM_003226	TFF3	1.65848	0.00982726
AY358222	CASP12	1.65823	0.0378339
AJ697855	CERKL	1.65805	0.00120883
NM_197941	ADAMTS6	1.65799	0.0110686
BC007638	HHIPL2	1.65506	0.00797463
XM_085234	NA	1.65447	0.0267438
BC011883	SORBS2	1.64936	0.00875247
NM_001039960	SLC4A8	1.64859	0.0216829
BC108925	ONECUT2	1.64766	0.0267282
BC062301	PNMA2	1.64716	0.000632972
NM_052944	SLC5A11	1.64666	0.00550963
NM_024017	HOXB9	1.64623	0.00980151
NM_005064	CCL23	1.646	0.00241401
BC035687	FMO5	1.64588	0.000429328
AF440403	MAATS1	1.64457	0.0475143
BC114376	SLCO1B1	1.64184	0.000251983
AK127150	DLG2	1.64045	0.0153967
NM_007257	PNMA2	1.63967	0.000712767
XM_934518	NA	1.63807	0.00837186
BC046632	GREM2	1.63807	0.0211133
AF349540	PLA2G12B	1.63736	0.00918518
AK026414	HKDC1	1.63687	0.00715777
BC005922	ICA1	1.63532	0.00672627
NM_003918	GYG2	1.63507	0.00406999
NM_133431	XAGE1B	1.63393	0.0426729
BC047064	SOX6	1.63141	0.0089884
NM_024621	VEPH1	1.62839	0.0167513
BC101660	VEPH1	1.62443	0.0340796
NM_004956	ETV1	1.61924	0.0220654
XM_932169	NA	1.61843	0.00162691
AK123061	NEK10	1.61796	0.000961338
BC089437	ACOT12	1.61523	0.0332674
AY283057	ANKS1B	1.61498	0.00751185
BC104862	B3GALT5	1.61485	0.00420032
NM_001875	CPS1	1.61412	0.0320708
NM_032863	FRAS1	1.61076	0.00847922
NM_015347	RIMBP2	1.60905	0.0483301
NM_172105	EYA4	1.60759	0.0112396
BC069301	GUCA2B	1.60674	0.00189886
AJ316284	NRXN3	1.60614	0.00608445
BC069420	PLCB1	1.6049	0.00350484
NM_018308	ACOXL	1.60403	0.0203579
BC108676	AGMO	1.60125	1.97e-05
NM_001039948	SGSM1	1.60086	0.00652063
NM_004132	HABP2	1.59949	0.00311044
NM_207357	LINC01140	1.59873	0.0246321
BC080530	B3GALT5-AS1	1.59737	0.03724
NM_003382	VIPR2	1.5966	0.00261967
BC005306	AZGP1	1.5965	0.0313973
BC051030	SEMA4G	1.59583	0.00102313
BC015565	HOXB9	1.59398	0.00506061
BC095543	HTR2C	1.59345	0.0366857
NM_014178	STXBP6	1.59187	0.034875
NM_031416	LINC00470	1.59156	0.0428152
NM_005172	ATOH1	1.59129	0.0454628
AK027571	HYDIN2	1.59112	0.0180773
NM_173687	NA	1.58828	0.0297514
NM_001133	AFM	1.5881	0.0209655
NM_013249	ZNF214	1.58808	0.00536927
NM_000029	AGT	1.58616	0.00881653
NM_000193	SHH	1.58607	0.00201471
XM_370866	NA	1.58546	0.0123225
XM_376179	NA	1.58513	0.00328409
NM_004617	TM4SF4	1.58377	0.0498795
NM_006651	CPLX1	1.58201	0.00274183
NM_002073	GNAZ	1.58175	0.00274957
NM_020340	ARFGEF3	1.58069	0.00807865
XM_290540	NA	1.58044	0.0319088
NM_001004320	AGMO	1.57868	0.00145296
BC106713	PTPRD	1.57838	0.0481785
NM_032562	PLA2G12B	1.57814	0.00693614
NM_004797	ADIPOQ	1.57711	0.0185735
NM_205854	SFTA2	1.57658	0.0361054
AY116215	NA	1.57634	0.0334081
NM_017558	HYDIN	1.57449	0.0176298
J05235	GGT1	1.57334	0.000528332
XM_496907	NA	1.57224	0.0438864
M76558	CACNA1D	1.57222	0.00971729
BC096162	DSCR4	1.57093	0.0146278
NM_001005196	OR8B4	1.57085	0.0390727
AK223139	ACSM3	1.56889	0.00578666
NM_024893	SYNDIG1	1.56869	0.00824036
BC065243	MITF	1.56808	0.00398069
NM_012082	ZFPM2	1.56748	0.0128502
BC020660	SPATA6	1.56709	0.00183661
NM_015192	PLCB1	1.56572	0.00801425
NM_005814	GPA33	1.5655	2.89e-05
BC030027	GNAO1	1.56389	0.00240555
BX640837	SLC26A3	1.5636	0.0212455
AK125135	MGLL	1.56274	0.00117576
NM_207186	OR10A4	1.56115	0.020479
AK127855	DAPK1	1.56025	0.00489972
NM_001006655	FAM149A	1.55832	0.00616665
NM_000916	OXTR	1.55827	0.00275035
NM_001830	CLCN4	1.55456	0.0397646
AJ310938	KLK3	1.55452	0.0170447
BC035969	ALB	1.55328	0.00447855
NM_001012644	DUSP15	1.55264	0.0113409
NM_052832	SLC26A7	1.55263	0.00685553
NM_133265	AMOT	1.55018	0.0127052
BC109222	ZFPM2	1.54835	0.0288528
AK026821	CCDC33	1.54805	0.0427798
NM_015381	TAFA5	1.54713	0.0345526
NM_003700	OR2D2	1.54708	0.0477617
NM_004490	GRB14	1.54607	0.00558693
NM_033128	SCIN	1.545	0.022077
BC098124	PPP1R14D	1.54212	0.00107988
BC093926	TRIM10	1.54084	0.00529851
BC008065	DIRAS2	1.54023	0.0354916
NM_173596	SLC39A5	1.54006	0.000209879
BC101604	WFDC6	1.53859	0.00777128
BC027993	CAPN9	1.53779	0.0493092
BC006534	KLHL41	1.53731	0.0264887
NM_172242	SPAG6	1.53658	0.0108382
NM_032951	MLXIPL	1.53533	0.00527669
CR610555	NA	1.53418	0.00218574
NM_198448	REG3G	1.53271	0.0331879
AF090937	SORBS2	1.53222	0.00569174
AK027618	VWDE	1.53039	0.0268643
AF318368	NA	1.52956	0.0072447
BC042127	IGF2	1.52934	0.0206639
NM_022068	PIEZO2	1.52916	0.0412186
NM_001031687	PIP5K1B	1.52701	0.00805417
NM_000477	ALB	1.52696	0.0119416
NM_080912	ASGR2	1.52647	0.00732556
AK022172	FMO5	1.52628	0.0009467
XM_931224	NA	1.52521	0.0338816
NM_020384	CLDN2	1.5238	0.0145386
NM_178456	C20orf85	1.52317	0.000449619
NM_182644	EPHA3	1.52313	0.0090609
AF416618	PRLR	1.52262	0.0415347
U80759	CELF3	1.52252	0.000935697
BC104771	SOWAHA	1.52119	0.00240527
NM_172104	EYA4	1.5188	0.021512
NM_004467	FGL1	1.51756	0.00974078
NM_004166	CCL14	1.51552	0.00031186
NM_001171	ABCC6	1.51541	0.00110885
AK097538	CES3	1.51496	0.0183464
NM_003728	UNC5C	1.51208	0.00823607
NM_004764	PIWIL1	1.51154	0.0412433
NM_002153	HSD17B2	1.51024	0.0272063
BC039065	ADH6	1.5088	0.0364622
XM_928403	NA	1.50828	0.0100338
NM_004100	EYA4	1.50729	0.0200183
XM_498379	NA	1.50495	0.00687795
NM_002423	MMP7	1.50311	0.0244333
BC002353	GPR162	1.50166	0.00052088
NM_002052	GATA4	1.50023	0.0331211
BC006523	SGK2	1.49733	0.0157029
NM_021924	CDHR5	1.49701	0.0101018
BC032836	LYPD6	1.49669	0.0243695
XM_927289	NA	1.49658	0.00659426
BC031060	PIWIL4	1.49613	0.000655632
XM_927471	NA	1.49447	0.00294716
AF421361	TRPC4	1.49396	0.00256294
NM_016247	IMPG2	1.49281	0.0183551
NM_005584	MAB21L1	1.49199	0.0190231
AK092826	PBLD	1.49165	0.000569584
NM_017549	EPDR1	1.48982	0.00424559
NM_173481	MISP	1.48966	0.00702089
NM_000665	ACHE	1.48935	0.00365443
NM_153362	PRSS35	1.48903	0.0321965
NM_000042	APOH	1.4878	0.00824801
NM_006063	KLHL41	1.48706	0.0144064
XM_932348	NA	1.487	0.0163644
NM_024750	LRRC2	1.48654	0.0091001
AK093084	VWA3B	1.48643	0.0357957
AJ270993	NA	1.48574	0.0349824
AY358368	CDHR5	1.4854	0.00535365
NM_000145	FSHR	1.48493	0.00100432
NM_182596	INTS4P1	1.4841	0.0390036
NM_004062	CDH16	1.48362	0.00528916
XM_928996	NA	1.48132	0.0380412
BC053670	CES3	1.47885	0.0360737
NM_018168	CCDC198	1.47514	0.0139382
BC046117	DNALI1	1.47491	0.012113
AL834349	TMEM130	1.47211	0.00216472
AK096803	NA	1.47142	0.0271203
NM_152629	GLIS3	1.47134	0.0103354
BC093035	RHOBTB1	1.47101	0.00123466
BC036068	CLCN4	1.4704	0.0215698
BC100955	MOGAT3	1.46951	7.83e-05
NM_022114	PRDM16	1.46893	0.00202146
BC062459	BTNL9	1.46582	0.0174507
NM_018488	TBX4	1.4649	0.021796
XM_934798	NA	1.46487	0.031877
NM_018298	MCOLN3	1.46482	0.0267759
BC041063	EYA4	1.46471	0.0287384
AF086451	LOC100996724	1.46412	0.019561
NM_007029	STMN2	1.46411	0.0126217
AK074675	PRKAG2	1.46236	0.00833934
BC036018	PTPRG	1.46233	0.00319367
NM_178176	MOGAT3	1.46214	0.000398492
NM_000921	PDE3A	1.46186	0.02482
BC105060	ACHE	1.45877	0.00422881
NM_145202	PRAP1	1.45853	0.0058886
BC032219	HID1	1.45735	0.00653425
XM_350880	NA	1.45608	0.0123251
NM_001392	DTNA	1.45549	0.00860593
NM_015480	NECTIN3	1.45383	0.0115633
AJ315514	NR3C2	1.45357	0.0150366
AL832756	JAKMIP3	1.45316	0.0342234
AF176812	DRD2	1.45295	0.0263246
BC036349	SPATA6L	1.45241	0.00354856
BC009738	PBLD	1.44951	0.00216609
BC067473	GPR83	1.44923	0.0321257
BC104857	SLC5A9	1.44875	0.00841079
XM_371878	NA	1.4481	0.0176282
BC034023	ALB	1.44759	0.0118664
XM_934611	NA	1.44636	0.00680219
NM_004179	TPH1	1.44536	0.0184545
AK027870	NA	1.44508	0.0175047
NM_000840	GRM3	1.4441	0.0488287
NM_173549	ERICH5	1.44397	0.0190552
NM_001006667	TAC3	1.44217	0.038928
AK127189	CFAP65	1.4421	0.0102036
BC014097	CREB3L1	1.44096	0.000787618
BC096276	SLC13A2	1.4376	0.00719638
NM_004665	VNN2	1.43704	0.0125421
NM_005330	HBE1	1.43672	0.0287726
AK096957	STXBP6	1.43588	0.0384996
NM_001010978	LDLRAD1	1.43518	0.00652867
BC101345	CHRFAM7A	1.43511	0.0459759
NM_024022	TMPRSS3	1.43442	0.0356081
AY439213	PRUNE2	1.43253	0.00818184
BC094752	ACHE	1.43115	0.00472028
BC025671	SLC26A3	1.43039	0.0311897
BC106949	RSPH4A	1.43033	0.0104301
AK126399	UNQ6494	1.42978	0.00928725
NM_017893	SEMA4G	1.42894	0.00358773
AY692424	ADAMTS6	1.42868	0.0178465
NM_024935	GREB1L	1.42786	0.022177
NM_002012	FHIT	1.42701	0.00982978
NM_199289	NEK5	1.42696	0.0425198
BC067808	NECTIN3	1.4264	0.0156931
XM_932065	NA	1.42552	0.0207919
NM_000111	SLC26A3	1.42522	0.0436331
D21255	CDH11	1.42411	0.00877858
NM_013361	ZNF223	1.42369	0.00437389
AF064493	LDB2	1.42289	0.009895
NM_198085	RNF148	1.42205	0.0163381
AK126846	NA	1.42152	0.0372449
XM_293656	NA	1.42149	0.011043
AF007170	TTC39A	1.41851	0.00520258
NM_006984	CLDN10	1.41458	0.0239465
BC035789	CBLN2	1.4141	0.0409644
NM_182904	P4HA3	1.41351	0.0412946
NM_025184	EFHC2	1.4128	0.0495265
NM_031501	PCDHA5	1.41241	0.00522181
XM_929203	NA	1.41184	0.0330564
AF049884	SORBS2	1.41157	0.0292331
NM_207108	ASTN1	1.40999	0.0171203
XM_032693	NA	1.40954	0.0172241
NM_023089	CAPN10	1.40911	0.0105111
NM_054108	PLAAT5	1.40855	0.035006
AK091467	RNF157	1.40767	0.00814344
NM_022783	DEPTOR	1.40713	0.00368086
BC096341	NA	1.40666	0.00667498
AK094150	CAPN5	1.40496	0.000968222
NM_031856	PCDHA8	1.40439	0.00198019
NM_021647	MFAP3L	1.40431	0.0269364
NM_003837	FBP2	1.40429	0.0471979
NM_172365	PPP1R36	1.40368	0.0224455
NM_006208	ENPP1	1.40162	0.0154034
NM_004668	MGAM	1.40157	0.0440443
NM_025074	FRAS1	1.40063	0.0427667
NM_002937	RNASE4	1.39904	0.00282158
BC031600	LCN12	1.39837	0.00383842
NM_177541	TAS1R1	1.39761	0.00812404
BC101029	MMEL1	1.39719	0.00705259
BC038840	NAALAD2	1.39689	0.0102802
AK223597	FRMD3	1.3968	0.0147348
XM_926941	NA	1.39548	0.0477637
NM_000460	THPO	1.39467	0.0212218
BC031229	PWWP3B	1.39251	0.0283909
AB042648	MYO18B	1.39221	0.0234482
AK074596	CELF4	1.39103	0.0207559
NM_018099	FAR2	1.3905	0.00520859
BC035876	MACROD2	1.38746	0.035012
NM_024080	TRPM8	1.38743	0.0228882
NM_003984	SLC13A2	1.38702	0.0237591
NM_001005473	PLCXD3	1.38691	0.0487877
AJ001815	NPHP1	1.38552	0.00817511
BC080585	GPR162	1.38523	0.00218329
XM_211988	NA	1.38494	0.0374188
AK001866	LRRC36	1.38401	0.0376038
XM_371344	NA	1.38388	0.015291
BC026251	PAH	1.38219	0.0183756
NM_000236	LIPC	1.38079	0.0116848
NM_003889	NR1I2	1.38029	0.0493827
AK090879	SOBP	1.37972	0.0227165
AK001324	FAR2	1.37971	0.013373
NM_007038	ADAMTS5	1.37867	0.0433411
AK128124	CAPN5	1.37855	0.00228248
CR749624	ZNF608	1.37756	0.0199532
NM_145051	RNF183	1.37518	0.0390325
NM_006546	IGF2BP1	1.37517	0.0212136
XM_934770	NA	1.37473	0.0247205
XM_372239	NA	1.37398	0.0477778
AY212935	CAMK1G	1.37229	0.0193378
AB067492	SCIN	1.37106	0.0178231
BC063880	ZNF415	1.36918	0.0306004
NM_020875	FRAS1	1.36871	0.0287187
NM_138370	PKDCC	1.36718	0.0155269
XM_926366	NA	1.36616	0.00179054
NM_001001523	RORC	1.36504	0.0163953
NM_017726	PPP1R14D	1.365	0.00363203
NM_031495	PCDHA2	1.3646	0.0103901
NM_005905	SMAD9	1.36276	0.00983792
BC106902	INMT	1.36122	0.0102613
BC009581	HSD17B2	1.35829	0.0415563
NM_030613	ZFP2	1.35818	0.0413901
NM_017614	BHMT2	1.35764	0.0407618
XM_928163	NA	1.35738	0.0483993
BC029176	SCGB3A1	1.35723	0.0302209
BC094730	NA	1.35489	0.0179528
NM_018328	MBD5	1.3532	0.0167843
NM_006558	KHDRBS3	1.35296	0.0281325
BC032606	KHDRBS3	1.35224	0.0237857
BC101025	SYT10	1.35222	0.0413501
NM_001869	CPA2	1.35204	0.0226605
BC112155	CHN2	1.35133	0.0100235
AK026597	CFAP43	1.35015	0.0317901
XM_929840	NA	1.34915	0.00142316
BC103740	LDLRAD1	1.34908	0.0290028
NM_178338	NA	1.34906	0.00639323
AK131039	ADAMTS6	1.34827	0.00615503
NM_152721	DOK6	1.34763	0.0127649
NM_001013652	PTGES2-AS1	1.34469	0.0154826
NM_031861	PCDHA11	1.34407	0.00431468
NM_003786	ABCC3	1.34372	0.0377663
BC112244	ZNF418	1.34312	0.0306925
NM_000102	CYP17A1	1.3431	0.045924
NM_002578	PAK3	1.34309	0.00831505
XM_496547	NA	1.34247	0.0129441
NM_031865	PCDHA13	1.34166	0.00292553
NM_138694	PKHD1	1.34138	0.0258379
BC051901	RAX	1.34004	0.00478658
AY424902	IYD	1.33946	0.00404145
NM_017770	ELOVL2	1.33929	0.026929
BC080541	ROR1	1.33915	0.00680945
AK057247	NEK10	1.33874	0.00498106
NM_001013719	ZNF391	1.33869	0.0391932
BC074956	IFNA14	1.33687	0.0270527
AJ748821	CRB1	1.33657	0.0344999
NM_033427	CTTNBP2	1.33639	0.041293
AK090444	LPCAT1	1.33621	0.0401583
AY692425	ADAMTS6	1.33576	8.06e-05
NM_080827	WFDC6	1.33562	0.0280571
NM_001012264	RNASE13	1.33548	0.0457215
BC036699	PAX8-AS1	1.33525	0.0148201
NM_022897	RANBP17	1.33461	0.00688288
NM_007028	TRIM31	1.33452	0.0194691
NM_014620	HOXC4	1.33386	0.013838
BC096277	SLC13A2	1.33361	0.034349
BC034977	UBQLNL	1.33321	0.0318631
NM_172366	FBXO16	1.33321	0.0374252
NM_031274	TEX13A	1.33243	0.0139087
NM_024806	JHY	1.33225	0.0258096
AK122677	ADAMTS18	1.33107	0.0163137
NM_199356	THPO	1.33091	0.0216372
NM_001756	SERPINA6	1.33058	0.0330915
NM_003991	EDNRB	1.328	0.00145216
AK027230	SPEF2	1.32798	0.0278885
NM_194431	RNASE4	1.32731	0.00296
NM_003822	NR5A2	1.32703	0.0251383
AK131406	VIPR2	1.32587	0.0139413
AJ305237	SLC5A11	1.32578	0.00634834
BC051771	FAM124A	1.32454	0.00395541
NM_138325	PCSK6	1.32432	0.036476
BX537580	ENPP1	1.32413	0.0159895
BC035047	ADRA2A	1.32307	0.0477778
BC020677	HNMT	1.32281	0.0162641
BC031554	RORC	1.32259	0.0200885
AF119890	NA	1.32187	0.015897
NM_006175	NRAP	1.32182	0.0194816
NM_138322	PCSK6	1.32135	0.0164852
NM_178344	C3orf35	1.32114	0.00846042
XM_497623	NA	1.32099	0.00752286
NM_001007139	IGF2	1.31969	0.0253809
NM_001004338	EPHA10	1.31928	0.00635525
NM_006189	OMP	1.31673	0.004101
XM_928549	NA	1.31655	0.0434388
NM_001134	AFP	1.31644	0.0363152
BC038585	TRIM15	1.31485	0.0101392
NM_152342	CDYL2	1.31389	0.00854161
BC031227	WDR88	1.31377	0.00123237
NM_000238	KCNH2	1.31349	0.0176896
NM_001008749	RAB19	1.31234	0.0437854
NM_001013641	TMEM82	1.31232	0.0320063
BC093648	F2RL2	1.31173	0.0181395
AF039390	TNFSF15	1.31158	0.0191435
AK001072	FRMD4A	1.3112	0.00160275
NM_020747	ZNF608	1.31086	0.022014
NM_001039112	FER1L6	1.31059	0.0479577
XM_933718	NA	1.31049	0.00384929
NM_017928	ANKRD40CL	1.3103	0.0400239
NM_001039724	NOSTRIN	1.30922	3.92e-05
XM_929861	NA	1.30882	0.01983
NM_024686	TTLL7	1.30666	0.0301226
BC035757	SCTR	1.3056	0.00510518
BC107762	DISP1	1.30547	0.00402973
BC044227	PACRG	1.30538	0.0319542
NM_001004325	KRTAP5-2	1.30493	0.0127244
NM_002980	SCTR	1.30385	0.0334067
BC074870	MYOZ3	1.30294	0.00532143
BC014424	CLDN2	1.30286	0.0352838
NM_021635	PBOV1	1.30246	0.0135977
BC100953	MOGAT3	1.30185	0.000953833
DQ063579	SLC4A8	1.3018	0.0248783
NM_004543	NEB	1.30119	0.00104667
NM_019066	MAGEL2	1.30072	0.0147916
NM_153614	DNAJB13	1.30051	0.0170767
NM_001461	FMO5	1.29966	0.0144432
AK074246	SLC22A9	1.29854	0.0457444
NM_178311	GGTLC1	1.29836	0.0081772
NM_032803	SLC7A3	1.29828	0.0186377
BC074755	HTR4	1.29729	0.0229633
XM_926000	NA	1.29672	0.017922
NM_002670	PLS1	1.29574	0.0437534
NM_020873	LRRN1	1.29506	0.0452082
NM_030878	CYP2C8	1.29432	0.0368619
NM_030651	PRRT1	1.29342	0.0154821
NM_138803	CCDC148	1.29272	0.0120736
NM_152486	SAMD11	1.29139	0.00766658
NM_014592	KCNIP1	1.28996	0.0428641
BC026030	ZNF239	1.28984	0.00834033
XM_931116	NA	1.28976	0.0125313
BC012727	SMPD3	1.2891	0.00100269
BC096828	GNAZ	1.28701	0.032602
NM_001290	LDB2	1.2862	0.0146362
AF420280	SCGN	1.28499	0.000280257
NM_002968	SALL1	1.28498	0.0135323
BC015509	MSX2	1.28491	0.0235348
NM_020805	KLHL14	1.28411	0.0401003
AK124936	FAM47E	1.2836	0.0158092
AY358857	MLPH	1.281	0.0282646
NM_001031741	NEK10	1.28001	0.0099715
NM_144647	CAPSL	1.27995	0.0346265
XM_089081	NA	1.27967	0.00247242
BC018359	MAT1A	1.27804	0.0315899
NM_005117	FGF19	1.27721	0.00201351
NM_207482	FSIP2	1.27693	0.0153413
NM_198461	LONRF2	1.2762	0.026467
AK027163	ARMC9	1.2739	0.0100111
AK122605	SVEP1	1.27361	0.0155497
AK056665	NA	1.27357	0.0409069
AK172829	FGFRL1	1.27297	0.0165444
BC039380	CLIC5	1.27281	0.0355069
NM_022449	RAB17	1.27245	0.0272192
NM_001181	ASGR2	1.27218	0.012546
XM_926011	NA	1.27199	0.00149955
BC022004	CTNNA3	1.27135	0.0478544
NM_178868	CMTM8	1.27007	0.0220795
NM_170775	KCNN2	1.26829	0.0301406
XM_370651	NA	1.26817	0.0390756
BC018396	KIAA0408	1.26805	0.00923264
NM_001013659	ZNF793	1.26729	0.0449234
NM_001024075	HNMT	1.26704	0.0343313
BC066251	IL17A	1.26698	0.016373
NM_001500	GMDS	1.26646	0.000304503
NM_000220	KCNJ1	1.26623	0.0440279
AF040260	GMDS	1.26587	0.0013974
AB210045	KIF5A	1.26493	0.03658
NM_153020	RBM24	1.26483	0.0196085
XM_929755	NA	1.26321	0.0253267
BC022379	SLC22A9	1.26296	0.0377633
AX781670	CDYL2	1.26173	0.00963088
NM_007244	PRR4	1.26121	0.00800368
NM_130467	PAGE5	1.26041	0.0255867
BC067766	SMAD9	1.26002	0.00723026
NM_138818	PRUNE2	1.25987	0.0190528
NM_000392	ABCC2	1.25972	0.0074502
NM_033063	MAP6	1.25935	0.0113273
NM_018958	NPAP1	1.25584	0.0404739
BC071747	CLDN2	1.25363	0.0490507
AF294278	PRDM16	1.25349	0.0111649
XM_926057	NA	1.25341	0.0199316
NM_001187	BAGE	1.25265	0.0331105
BC026182	NME5	1.25228	0.0242674
BC065370	NOL4L	1.2521	0.0147601
BC101601	SHF	1.25161	0.0132873
NM_007102	GUCA2B	1.25069	0.0122573
XM_932564	NA	1.25048	0.0477767
XM_931577	NA	1.25031	0.0286627
BC111981	ZNF221	1.2502	0.00192183
AK123450	NA	1.24922	0.0410177
AB051500	ASXL3	1.24751	0.00792315
AJ606307	MUC17	1.24745	0.0153906
NM_033201	BMERB1	1.2474	0.00155187
AF106685	MYEF2	1.24728	0.0186559
BC062698	ANG	1.24566	0.00393692
NM_003044	SLC6A12	1.2451	0.0124701
BC036489	PNMA2	1.24464	0.00786685
NM_144577	CCDC114	1.24413	0.00446325
NM_080735	WFDC2	1.24412	0.0214356
XM_926804	NA	1.24315	0.020972
NM_021956	GRIK2	1.24131	0.0404331
NM_001050	SSTR2	1.24099	0.00875346
NM_013984	NRG2	1.24049	0.0443986
XM_934521	NA	1.23932	0.0276866
NM_001234	CAV3	1.23809	0.0455835
BC052614	SSUH2	1.23728	0.0173363
AK126014	CRACD	1.23685	0.0122782
NM_000248	MITF	1.23623	0.0265425
NM_013279	MYRF	1.23588	0.00585523
AY358164	BAIAP2L2	1.23584	0.0161361
NM_006668	CYP46A1	1.23563	0.0199983
BC049842	DLC1	1.23539	0.0107022
NM_020554	TCL6	1.23515	0.0426369
NM_152390	TMEM178A	1.23454	0.0456012
NM_145052	UPRT	1.23428	0.0387255
BC093830	SYT13	1.23351	0.0344976
NM_006446	SLCO1B1	1.23225	0.0147238
NM_001006638	RAB37	1.23225	0.00197858
NM_001032380	NA	1.23219	0.011992
BC093893	LCN15	1.23205	0.0205579
NM_194325	ZNF30	1.23167	0.000532593
BC069609	SPRY3	1.23153	0.03571
XM_495883	NA	1.23145	0.0249758
NM_001010907	C9orf153	1.23105	0.0365087
NM_032011	PCDHGA3	1.23051	0.013922
BC022294	PLGLB2	1.23022	0.0246094
BC074756	MAGEB3	1.2297	0.0271775
NM_001032364	GGT1	1.22927	0.0103365
NM_001013721	NA	1.22871	0.0222051
NM_033031	CCNB3	1.22819	0.0461163
BC098136	SATB2	1.22793	0.0118768
NM_004858	SLC4A8	1.22712	0.0271292
AK075144	CLIC5	1.2268	0.0255678
NM_022445	TPK1	1.22648	0.0347845
X87175	ETV1	1.22586	0.0316086
NM_001037	SCN1B	1.22536	0.0129685
BC026961	MITF	1.22311	0.00524931
NM_002381	MATN3	1.22282	0.0343131
NM_152376	UBXN10	1.22261	0.0391829
XM_934522	NA	1.22226	0.0115894
NM_144648	LRGUK	1.22201	0.0226832
NM_152279	ZNF585B	1.22069	0.0170682
NM_001001663	TMEM211	1.21978	0.0360562
AK027673	PBLD	1.21897	0.00876315
XM_929884	NA	1.21886	0.0235677
NM_022307	ICA1	1.21802	0.00465054
XM_932638	NA	1.21718	0.0088826
AF493931	RGS7	1.21717	0.0278702
AK096571	ZNF682	1.21643	0.0453371
NM_001024074	HNMT	1.21325	0.0285633
AL512706	DNAH6	1.21315	0.0168377
BC014785	EPCAM	1.21307	0.0022759
NM_031950	FGFBP2	1.21249	0.0405709
NM_006909	RASGRF2	1.21089	0.00512863
BC096342	NA	1.21076	0.0213618
BC107597	CCDC148	1.21006	0.013135
BC036846	PRSS33	1.20925	0.0147511
XM_933567	NA	1.20916	0.018358
NM_002354	EPCAM	1.20762	0.00405987
BC010732	HOXB-AS3	1.20743	0.0184232
NM_152655	ZNF585A	1.207	0.0246188
AK027065	SLC17A9	1.20648	0.0121548
NM_080283	ABCA9	1.20643	0.035184
NM_020809	ARHGAP20	1.20591	0.0157687
AK095598	DENND5B	1.20466	0.0197092
NM_000500	CYP21A2	1.20452	0.0258264
NM_000672	ADH6	1.20197	0.0349898
X95701	GATA6	1.20164	0.0346465
NM_052854	CREB3L1	1.20109	0.00715461
BC109302	FAM171A1	1.20101	0.029333
NM_207379	TMEM179	1.2001	0.0120612
NM_001031699	NA	1.19997	0.0381007
XM_926650	NA	1.19996	0.007365
NM_014461	CNTN6	1.1993	0.045315
CR749343	ZNF774	1.1988	0.0112985
BC036761	CYYR1	1.19873	0.014274
BC041485	STXBP4	1.1987	0.0111719
XM_373985	NA	1.19824	0.0486153
NM_001482	GATM	1.19726	0.0214189
BC028237	GDF10	1.19692	0.016566
XM_929056	NA	1.19686	0.0182753
NM_015831	ACHE	1.1964	0.0184129
AB118749	HIF3A	1.19633	0.0397635
NM_001039844	ACBD7	1.19466	0.0217704
NM_144966	FREM1	1.19401	0.00934991
NM_002885	RAP1GAP	1.19401	0.028828
NM_031859	PCDHA10	1.19362	0.0185084
NM_133625	SYN2	1.19341	0.0229936
BC011519	AGT	1.19332	0.0215102
NM_020836	BEGAIN	1.19283	0.00532234
XM_931904	NA	1.19218	0.0101951
XM_932086	NA	1.19202	0.0392568
NM_144690	ZNF582	1.19148	0.0200528
XM_930986	NA	1.19115	0.0158941
NM_019858	GPR162	1.19024	0.00473951
BC062606	LARP1B	1.19001	0.0350869
BC057796	RBMXL2	1.18959	0.0100924
BC109308	ANO4	1.18883	0.0392855
NM_003466	PAX8	1.18829	0.0122825
NM_018401	STK32B	1.18813	0.00333887
AK128606	VWA3A	1.1879	0.0367457
XM_934805	NA	1.18654	0.00998937
NM_014936	ENPP4	1.18475	0.0481361
NM_152704	AMER2	1.18456	0.00313683
NM_000053	ATP7B	1.18389	0.0490595
NM_080860	RSPH1	1.18386	0.0300692
NM_001002026	CLDN18	1.18383	0.0345559
NM_000823	GHRHR	1.1834	0.0058236
NM_001029944	BCL2L15	1.1832	0.0414676
XM_374046	NA	1.1826	0.0304974
NM_018952	HOXB6	1.18158	0.0462171
NM_022166	XYLT1	1.18107	0.0150575
NM_014428	TJP3	1.18093	0.0113971
NM_198215	FAM13C	1.1795	0.0463062
NM_199127	GGTLC2	1.17926	0.0202703
NM_021785	RAI2	1.17834	0.0247606
NM_018584	CAMK2N1	1.17821	0.0157527
NM_013340	PCDHB1	1.17802	0.0470859
NM_001039936	CHN2	1.178	0.0430263
XM_929038	NA	1.17689	0.0299618
XM_929268	NA	1.17674	0.0304516
AF334270	ACHE	1.17658	0.0224556
NM_013359	ZNF221	1.176	0.00511159
NM_003551	NME5	1.17475	0.0226131
NM_152431	PIWIL4	1.17461	0.0231249
NM_153345	TMEM139	1.17335	0.0341996
NM_000769	CYP2C19	1.17261	0.0452676
AK096202	KIAA1755	1.17258	0.0223836
BC015442	DNAH6	1.17214	0.0364731
XM_931405	NA	1.1719	0.0402408
XM_374179	NA	1.17158	0.00966709
NM_178008	STARD13	1.17142	0.0279754
NM_001001715	FARP1	1.17129	0.00536098
NM_001013698	SMCO3	1.17114	0.0289057
NM_002924	RGS7	1.17066	0.0225225
NM_001029946	BCL2L15	1.17057	0.0309286
NM_130762	MADCAM1	1.17048	0.00967991
NM_001005407	CACNA1H	1.17011	0.026558
NM_001039395	SPATA6L	1.16935	0.0122862
AF079529	PDE8B	1.16765	0.019828
BC101662	LONRF2	1.16639	0.0156002
BC062679	CST2	1.16553	0.0277263
NM_177539	TAS1R1	1.1649	0.0134515
XM_376677	NA	1.16372	0.0277181
XM_375443	NA	1.16294	0.0104623
NM_000128	F11	1.16229	0.0285115
NM_001029945	BCL2L15	1.16156	0.0413077
XM_934050	NA	1.16141	0.0388699
NM_006695	RUNDC3A	1.16049	0.0389227
NM_138453	RAB3C	1.15946	0.0349122
NM_017678	NXPE4	1.1592	0.0395193
NM_005847	SLC23A1	1.15914	0.000214536
BC041595	FARP1	1.15885	0.00465031
NM_025047	ARL14	1.15812	0.0173488
NM_199228	THPO	1.15688	0.0228143
BC008604	TMEM169	1.15379	0.0441224
NM_014270	SLC7A9	1.15369	0.0170065
BC109311	MYRIP	1.15343	0.00720464
AB110790	SNCAIP	1.1531	0.00916249
NM_133266	SHANK2	1.15309	0.0154158
BC074806	HOXB2	1.15289	0.0398229
XM_934785	NA	1.15179	0.0124953
NM_152534	NEK10	1.15119	0.0170659
BC030198	ITGA9	1.15105	0.0240746
BC114473	ALDH8A1	1.14912	0.0296937
AK130906	NA	1.14831	0.0151415
NM_023943	TMEM108	1.14732	0.0415762
AL833520	ZNF204P	1.14658	0.0402587
AB006589	ESR2	1.14624	0.0304432
NM_021915	ZNF69	1.14617	0.0204725
AK097334	CRACR2B	1.14602	0.0245061
NM_001013712	LINC01124	1.14552	0.0167889
XM_932672	NA	1.1455	0.0105936
NM_207497	LINC00336	1.14412	0.00338423
XM_932042	NA	1.14363	0.0161695
BC101027	MMEL1	1.14011	0.0133459
BC101008	ZNF582	1.13967	0.0382489
AK074071	NOX5	1.1395	0.0154935
BC105061	ZNF454	1.13884	0.0104295
NM_052913	TMEM200A	1.13864	0.0252398
NM_001007471	TRPM3	1.13792	0.0355277
BC099646	NAALAD2	1.13705	0.0428078
XM_927972	NA	1.13701	0.00932249
XM_292260	NA	1.13688	0.0429316
AK054965	LINC01530	1.13658	0.0309437
NM_004791	ITGBL1	1.13552	0.0343768
NM_198493	ANKRD45	1.13514	0.0200741
BC074890	TNFSF11	1.13473	0.0163466
BC089419	ZNF542P	1.13468	0.0247562
AK075180	CRACR2B	1.13441	0.0305567
NM_173561	UNC5CL	1.13112	0.00562201
NM_173645	DNAH6	1.13082	0.0172666
NM_003919	SGCE	1.13023	0.0341724
BC031265	TSPAN12	1.13002	0.0334692
NM_207501	LOC105378085	1.12885	0.0412114
NM_145036	CEP112	1.1285	0.00952824
NM_033512	TSPYL5	1.12773	0.0368226
XM_926740	NA	1.12693	0.0143327
XM_925855	NA	1.12539	0.0494686
AK096054	SLC6A19	1.12511	0.0289385
NM_194430	RNASE4	1.12391	0.00707776
NM_000705	ATP4B	1.12386	0.0224351
BC067436	CYP3A7	1.12111	0.036455
BC016665	TOX	1.11995	0.0444556
BC050278	ELOVL2	1.11931	0.0484764
XM_931129	NA	1.1193	0.0388569
Y08756	HTR4	1.11805	0.0418931
BC036788	ITGBL1	1.11758	0.0387312
XM_499061	NA	1.1166	0.00559275
CR456573	SERPIND1	1.11509	0.0112487
NM_015919	ZNF226	1.11446	0.0148369
BC023560	FRMD3	1.11359	0.0476021
AK098695	NA	1.11351	0.0127496
XM_930250	NA	1.11179	0.0349218
BC005850	RUNX1T1	1.1112	0.0375415
NM_014005	PCDHA9	1.11024	0.0359868
XM_935389	NA	1.11014	0.0173481
CR622102	NA	1.10972	0.0227063
XM_926390	NA	1.10897	0.0247371
CR749572	IMPG1	1.10805	0.0264178
NM_052812	TRIM15	1.10774	0.00727829
BC101712	ZNF528	1.10738	0.0461958
NM_016644	PRR16	1.10693	0.0458074
BC089442	FOXF1	1.1068	0.0193509
XM_934512	NA	1.10606	0.0276739
CR749477	SPAG16	1.10549	0.0382753
BC108906	TJP3	1.10515	0.0179254
AB096935	KRTAP24-1	1.10456	0.00955611
NM_014298	QPRT	1.10438	0.0418066
AK056317	CPZ	1.10294	0.0323886
CR607386	NA	1.10277	0.0309562
BC111069	RFTN2	1.10215	0.0112645
NM_001002837	INPP5J	1.1018	0.00442628
NM_004562	PRKN	1.10086	0.00971872
BC033680	DDAH1	1.09845	0.0199602
XM_927433	NA	1.09822	0.0167462
NM_007185	CELF3	1.0976	0.00213681
NM_145720	TIGD4	1.09751	0.044482
NM_017712	PGPEP1	1.09612	0.00559958
NM_012340	NFATC2	1.09553	0.032227
AY496266	ARHGAP20	1.09546	0.0230834
AL157430	TMEFF2	1.09361	0.0347355
AF282262	GHRHR	1.09312	0.0476516
XM_928530	NA	1.09298	0.0337431
NM_022342	KIF9	1.09047	0.0353318
NM_001005922	KRTAP5-1	1.08834	0.0311541
BC026342	GNAZ	1.0882	0.023253
NM_003834	RGS11	1.08554	0.0448971
NM_153703	PODN	1.08552	0.027465
NM_053280	ODF3	1.084	0.00335774
NM_032095	PCDHGB1	1.08367	0.0288487
NM_000789	ACE	1.08219	0.0130245
NM_031460	KCNK17	1.08186	0.0070547
BC073830	C8orf31	1.08144	0.0362781
BC069704	CALCA	1.08122	0.0444421
BC019247	SPAG8	1.08113	0.0237638
NM_002146	HOXB3	1.08062	0.030204
U18088	PDE4A	1.08029	0.00763999
BC020873	CLCNKB	1.07941	0.0175078
BC104173	MGARP	1.07893	0.0154122
XM_166132	NA	1.07856	0.0232282
AK095698	LOC285097	1.07837	0.0398604
NM_152891	PRSS33	1.07789	0.0434169
NM_033103	RHPN2	1.07762	0.0383551
XM_928467	NA	1.0771	0.0103324
NM_000539	RHO	1.07592	0.0453322
NM_152715	TBCEL	1.07481	0.0223832
XM_929437	NA	1.07338	0.0311304
NM_000907	NPR2	1.07233	0.0172299
NM_000583	GC	1.07154	0.0483609
AB051462	PRDM16	1.07075	0.0211321
BC039263	GRID1	1.07004	0.0186162
AK128633	NA	1.06901	0.0360664
BC062621	TTC21A	1.06879	0.0106427
XM_037557	NA	1.06419	0.0355089
NM_080734	WFDC2	1.06301	0.048064
BC032336	FHIT	1.06263	0.0207059
BC106947	GPC6	1.0615	0.0360744
NM_001014336	IL31	1.06145	0.0419955
NM_178173	CCDC36	1.06069	0.048938
NM_004118	FOXS1	1.06016	0.00590925
NM_175709	CBX7	1.06015	0.0143625
AK093669	ZNF675	1.05962	0.0465645
BC036393	CASC2	1.05862	0.0496117
AB209701	SPOCK1	1.05716	0.024601
BC060845	L3MBTL3	1.05681	0.00201028
BC069765	LINC00597	1.05496	0.0223123
NM_018152	DZANK1	1.05451	0.0165822
AL035122	ADCY10	1.05334	0.048153
AK125321	NA	1.05204	0.00861474
AK023546	PLCL2	1.05183	0.0154009
BC062668	CCL28	1.05076	0.00888335
BC092428	ZNF599	1.05074	0.0466113
XM_209187	NA	1.04999	0.00541315
NM_001037537	PHYH	1.04892	0.0477836
NM_001004309	ZNF774	1.04844	0.00312561
BC113862	ALDH8A1	1.04829	0.0382585
BC031084	PLIN1	1.04788	0.0151282
BC101533	AXIN2	1.04349	0.0246587
NM_199037	SCN1B	1.04266	0.0449283
NM_031421	TTC25	1.04224	0.0159542
NM_001004439	ITGA11	1.04176	0.0352068
NM_001031746	VSTM4	1.04151	0.0362477
NM_014859	ARHGAP44	1.04134	0.0374846
NM_133479	SLC4A5	1.04092	0.0213983
NM_130897	DYNLRB2	1.04079	0.00797521
NM_001039787	ZBTB44-DT	1.04072	0.0312456
BC109248	PLGLB1	1.04069	0.0247182
NM_012342	BAMBI	1.04035	0.0339394
XM_930820	NA	1.0403	0.0322742
NM_018725	IL17RB	1.03877	0.00838639
AK124633	CCDC62	1.03811	0.0225633
NM_175883	OR7D2	1.03649	0.0318203
NM_145798	OSBPL7	1.03648	0.0304986
AJ225895	COLQ	1.0363	0.0320508
BC074836	FUT3	1.03619	0.0402497
XM_931849	NA	1.03615	0.0493671
NM_177978	CHRD	1.03607	0.0278159
BC107164	GPA33	1.03598	0.0187168
BC104440	TSPO2	1.03434	0.0252503
XM_928912	NA	1.03362	0.0451348
NM_005173	ATP2A3	1.03355	0.0342666
AY430414	ENTPD8	1.03264	0.0297407
NM_178860	SEZ6	1.03202	0.019291
NM_001015002	LLGL2	1.03198	0.0324442
BC104758	CELF3	1.03193	0.0161514
BC015881	STRA6	1.03058	0.0449048
NM_130898	CREB3L4	1.02979	0.00916399
BC028069	NLRP12	1.02927	0.0426537
XM_931105	NA	1.02874	0.0341782
NM_144973	DENND5B	1.02699	0.0410783
AK054643	SAMD11	1.02669	0.0131495
BC106871	SLC41A2	1.02604	0.0411296
AF212234	PECR	1.02576	0.0122214
NM_001007542	LOC100288254	1.02508	0.0479268
AK130638	NA	1.02468	0.00727693
NM_016511	CLEC1A	1.02435	0.0189725
XM_934248	NA	1.02421	0.0247904
CR621422	NA	1.024	0.0018183
NM_016134	CPQ	1.02249	0.00977057
XM_927520	NA	1.0218	0.0295641
NM_002846	PTPRN	1.01965	0.0358945
XM_934927	NA	1.0195	0.0458572
AF016535	ABCB1	1.01935	0.0203007
AF208111	IL17RB	1.01885	0.0101618
NM_033514	LIMS3	1.01751	0.0244537
AK124207	NA	1.01679	0.0189799
BC050563	SPATA24	1.01671	0.00560094
NM_005585	SMAD6	1.01669	0.04116
NM_004970	IGFALS	1.01372	0.0329731
AK057357	CCDC114	1.01358	0.0221594
NM_001025200	CTRB2	1.01332	0.017877
XM_928884	NA	1.01232	0.0304174
AF118069	NA	1.01184	0.031806
NM_003627	SLC43A1	1.01122	0.00343218
NM_001005614	EDA	1.0097	0.0472889
NM_001006603	SYPL2	1.0083	0.0278481
NM_024582	FAT4	1.00702	0.0121797
NM_181756	ZNF233	1.00689	0.0416357
XM_030378	NA	1.00534	0.0354701
NM_001145	ANG	1.00496	0.00837154
NM_207419	C1QTNF8	1.00459	0.0399515
NM_005456	MAPK8IP1	1.00372	0.0459868
NM_176890	TAS2R50	1.0037	0.0219414
NM_138411	FAM71E1	1.00367	0.0148448
BC075006	LZTS1	1.00358	0.0438025
BC069328	BMF	1.00279	0.0176015
NM_017662	TRPM6	1.0024	0.0489017
NM_022158	FN3K	1.00149	0.00814039
BC062357	LOC100134868	1.00146	0.0229393
BC068580	DENND5B	1.0012	0.0368649
NM_024764	CATSPERB	1.00088	0.0496193
NM_181356	SUPT3H	1.00058	0.0428276
NM_006630	ZNF234	1.00026	0.0178554
NM_052851	STARD13	0.999221	0.00786795
NM_003982	SLC7A7	0.999032	0.0295395
NM_006671	SLC1A7	0.997457	0.0110275
NM_152750	CDHR3	0.997333	0.0215029
XM_931448	NA	0.996697	0.0491889
BC100803	CDYL2	0.99377	0.0168523
BC064632	MCF2L2	0.993732	0.0217072
NM_002700	POU4F3	0.992802	0.0467641
BC047690	MRAS	0.992731	0.0430983
NM_024689	DIPK2B	0.991674	0.0224282
U50529	N4BP2L2	0.98929	0.0393342
BC038962	CREB3L4	0.989237	0.00318356
NM_006907	PYCR1	0.989009	0.010963
BC069573	KCNK5	0.988838	0.01558
XM_931919	NA	0.988411	0.0278379
NM_145003	TSNARE1	0.98822	0.0475269
NM_014867	KBTBD11	0.987085	0.0472774
BC093749	LINC00310	0.986603	0.0102229
BC041668	RIPK3	0.986425	0.0380778
CR606412	NA	0.985948	0.00393873
AK131342	ZKSCAN2	0.984873	0.0196499
NM_024512	LRRC2	0.984528	0.0471782
XM_927926	NA	0.984204	0.0211216
NM_024767	DLC1	0.981929	0.0187528
XM_931334	NA	0.981476	0.0134629
BC030516	LARP1B	0.98044	0.0491442
XM_375163	NA	0.980177	0.025547
NM_007193	ANXA10	0.979627	0.0287029
NM_134268	CYGB	0.977405	0.0119246
NM_018977	NLGN3	0.975313	0.0424519
U32331	DKK3	0.974691	0.0215361
BC064479	DIXDC1	0.973989	0.0269451
AK091966	PDZD3	0.9725	0.0228923
BC050280	ITGA7	0.972479	0.00821674
BC106028	NA	0.971874	0.0429649
BC058036	FOLR2	0.970996	0.0178116
BC112345	CHRD	0.970555	0.0237978
AK027439	SEMA6A	0.970384	0.0372935
NM_019846	CCL28	0.967436	0.0245366
AK056753	ZNF420	0.966384	0.0381013
BC075051	ZNF155	0.966045	0.0192275
NM_002152	HRC	0.965251	0.0466587
XM_068632	NA	0.964364	0.0248386
NM_005100	AKAP12	0.964338	0.0441888
NM_001031748	C12orf40	0.964206	0.0304575
BC107596	CCDC148	0.963292	0.0364
AK125809	LINC00689	0.960964	0.0215649
NM_205863	PARD3B	0.96059	0.0199332
BC044242	RSPH10B2	0.958975	0.00936016
NM_001024938	SLC2A11	0.956633	0.00585482
NM_016563	RASL12	0.954411	0.0476928
NM_173584	CRACR2B	0.954232	0.0472989
NM_176820	NLRP9	0.954193	0.0181057
NM_017691	LRRC49	0.953836	0.0434116
BC030664	PAQR8	0.952288	0.0458564
BC112253	IRAK1BP1	0.951547	0.00637088
NM_004102	FABP3	0.951107	0.0172336
XM_927317	NA	0.951047	0.0410883
NM_018987	SEMA5B	0.948974	0.0195904
AF401654	MAGI1	0.948734	0.0123804
DQ238597	SPATA20	0.947656	0.011187
BC108915	VENTX	0.94615	0.02199
AK128261	NA	0.945557	0.0318109
AJ249209	GRIK5	0.943195	0.0447238
NM_002147	HOXB5	0.940698	0.0199069
BC109221	SLC4A5	0.940321	0.0445271
XM_376436	NA	0.939495	0.00521993
AK093250	LRRC27	0.938035	0.0259441
NM_015873	VILL	0.937767	0.0360446
NM_152606	ZNF540	0.937687	0.0497016
NM_001010868	C6orf163	0.937374	0.0267007
NM_024866	ADM2	0.937184	0.0048293
NM_001012988	LINC00937	0.936265	0.0226737
NM_138451	IQCD	0.935853	0.0446271
AY359016	PTCH2	0.935606	0.00864839
NM_020663	RHOJ	0.93505	0.0312909
XM_927534	NA	0.934839	0.00928987
NM_002058	NA	0.933614	0.0433697
NM_003740	KCNK5	0.933019	0.0201929
XM_931048	NA	0.930341	0.039906
NM_176792	MRPL43	0.927661	0.000632509
AK128825	NA	0.927153	0.0128816
NM_001052	SSTR4	0.926965	0.0495909
NM_000092	COL4A4	0.926657	0.0381013
NM_057177	PARD3B	0.925873	0.024447
BC109288	INPP5J	0.923811	0.0403417
NM_022082	SLC17A9	0.923156	0.0491915
AK124469	NA	0.921906	0.0446405
NM_152775	CCDC110	0.9203	0.0472659
NM_009590	AOC2	0.919953	0.02058
BC051329	PTPRB	0.919951	0.031209
AF179899	MEIS2	0.915937	0.0478504
NM_006690	MMP24	0.9151	0.015353
AK074107	SLC17A9	0.914943	0.0398685
NM_153266	TMEM151A	0.91409	0.0447275
NM_001001671	MAP3K15	0.912257	0.0364847
NM_003458	BSN	0.912236	0.0209708
BC037776	NTSR2	0.911694	0.0218654
XM_934307	NA	0.911265	0.046798
NM_016651	DACT1	0.909571	0.0484467
AK123565	FARP1	0.909108	0.0383888
NM_198539	ZNF568	0.907371	0.047933
XM_371956	NA	0.902732	0.0402224
AF119833	CDK14	0.901733	0.0273539
NM_000312	PROC	0.900867	0.0443423
NM_001010931	HGF	0.90083	0.0385516
BC089396	LINC00324	0.900728	0.0470543
AB024964	RBPJL	0.900713	0.0231531
AF280547	NRP1	0.90028	0.038353
NM_032827	ATOH8	0.899776	0.016302
NM_001451	FOXF1	0.89942	0.0279683
BC069440	CDYL2	0.899279	0.0340852
NM_030766	BCL2L14	0.899199	0.0393742
BC033167	CABP4	0.897816	0.0408465
BC030261	ZNF222	0.8968	0.0202697
BC069498	MECOM	0.895247	0.0188223
NM_001008397	GPX8	0.893659	0.0164046
NM_012443	SPAG6	0.893492	0.0392098
NM_005985	SNAI1	0.892686	0.0468744
XM_295865	NA	0.891854	0.0426464
XM_935243	NA	0.889602	0.0202415
NM_130808	CPNE4	0.889547	0.0390526
AF234262	NA	0.888678	0.042854
NM_001033083	PBLD	0.88777	0.0398969
NM_002614	PDZK1	0.886959	0.0442191
BC039315	EFCAB6	0.885554	0.0454924
NM_014729	TOX	0.885168	0.0293002
AK000719	FLJ20712	0.883938	0.0488006
NM_207438	NA	0.882767	0.047123
NM_016246	HSD17B14	0.879125	0.0225692
NM_032412	CYSTM1	0.878263	0.011987
NM_016234	ACSL5	0.878014	0.0488708
NM_003178	SYN2	0.877171	0.0292495
BC093815	PCDH18	0.876366	0.0299632
NM_002847	PTPRN2	0.875913	0.0439782
BC017249	ENO3	0.875419	0.0396642
AK125308	LOC100129484	0.874943	0.0115113
BC096213	GJC1	0.874788	0.0403845
AF367022	KCNIP3	0.873742	0.0178845
NM_173817	PIEZO2	0.868766	0.031565
BC065518	EEPD1	0.86791	0.013932
NM_053017	ART5	0.867348	0.0215447
NM_198567	SIMC1	0.865807	0.0335289
AK027158	NA	0.865351	0.0380475
NM_032866	CGNL1	0.864812	0.0427685
AK124908	ALDH1L1	0.864764	0.0212508
NM_012445	SPON2	0.864643	0.0484139
BC030538	CPED1	0.86391	0.0392584
NM_000795	DRD2	0.8639	0.0471742
AK000253	ASAP3	0.862275	0.0392091
AL833722	ZNF195	0.860911	0.0397197
NM_173501	MOSMO	0.860845	0.0382147
NM_001007248	ZNF599	0.859197	0.0412156
NM_006349	ZNHIT1	0.85904	0.0303269
NM_020859	SHROOM3	0.858358	0.049304
BC093723	GIPR	0.857521	0.0498963
BC015207	ACTR3B	0.857047	0.0274715
XM_932816	NA	0.854454	0.015215
BC104784	IL1RAPL2	0.853096	0.0491537
XM_930765	NA	0.851176	0.0395735
BC022511	EDNRA	0.848182	0.0287401
AF028825	DLG4	0.847827	0.0444795
AK097292	RASGRP4	0.847392	0.0280318
BC010514	CLU	0.845949	0.030685
BC073925	NA	0.844757	0.0253606
NM_031500	PCDHA4	0.844345	0.0324628
NM_018025	GPATCH1	0.842942	0.00659753
NM_198536	TMEM205	0.842339	0.0490163
NM_144987	U2AF1L4	0.840224	0.0392381
NM_001031733	CALML4	0.83892	0.0317532
NM_016179	TRPC4	0.838061	0.0283919
NM_003578	SOAT2	0.83786	0.00519381
NM_018969	GPR173	0.837238	0.0273702
AK130172	TNFRSF14	0.837144	0.0374843
NM_145177	DHRSX	0.837043	0.0144057
BC032482	KLHDC9	0.836141	0.0493558
BC064365	CEP57L1	0.835581	0.0177187
XM_930557	NA	0.8344	0.0155373
XM_931305	NA	0.834102	0.0338089
M58597	FUT4	0.833557	0.0325073
NM_014055	IFT81	0.831613	0.0396699
XM_062788	NA	0.831496	0.0269567
NM_000328	RPGR	0.831052	0.0487573
BC109060	DET1	0.829695	0.0297571
BC047675	ZNF767P	0.826949	0.0381362
NM_014698	TMEM63A	0.825756	0.0208759
BC034377	PROC	0.824586	0.0373505
AB040883	FNIP2	0.820774	0.013814
AK096778	NA	0.818904	0.0300487
AK098529	CCDC65	0.816939	0.037574
NM_207495	LINC01011	0.816927	0.0296816
NM_002336	LRP6	0.816393	0.00943344
NM_031864	PCDHA12	0.81256	0.0372181
AK131493	MYO5C	0.811289	0.0165444
NM_138343	KLC4	0.809894	0.00907002
AK126082	NA	0.808482	0.0331944
NM_019020	TBC1D16	0.807669	0.03879
NM_002206	ITGA7	0.806594	0.0274102
NM_133463	AMZ1	0.803838	0.0469617
BC093800	EFCC1	0.80331	0.0296964
AK027167	CCDC81	0.801307	0.026575
AK098627	SEC16B	0.801304	0.0352985
NM_203289	POU5F1	0.801026	0.0356178
BC010092	FUZ	0.799678	0.00649369
AK127462	NA	0.79363	0.0434153
NM_173688	NKAIN3	0.79317	0.0434118
NM_006950	SYN1	0.791349	0.0492975
NM_203510	TM6SF2	0.790628	0.038082
NM_173802	ETFBKMT	0.789935	0.0312761
AL713794	MYO15A	0.788081	0.0464322
AK090927	EFCAB2	0.786533	0.0247581
NM_001001556	GALK2	0.785045	0.0286534
XM_933015	NA	0.784106	0.0460328
BC033858	SLC44A3	0.782462	0.0411956
NM_053013	ENO3	0.77876	0.0300215
XM_934168	NA	0.778122	0.0347326
AY679521	SEPTIN6	0.775454	0.0369307
AK125806	SRRM2-AS1	0.773334	0.0406721
NM_005854	RAMP2	0.771616	0.0281283
XM_932019	NA	0.767853	0.019765
BC089441	NPTX1	0.766221	0.0179306
NM_133367	PAQR8	0.766088	0.0495405
AF295729	LINC00470	0.764876	0.0358184
XM_085261	NA	0.764239	0.0301856
AK126267	PNPLA7	0.761808	0.0368417
DQ104738	DZANK1	0.761706	0.0354033
NM_181804	PKIG	0.761679	0.0368296
NM_001644	APOBEC1	0.761658	0.0418491
BC069505	BMF	0.757688	0.0158097
AY834277	LRRC23	0.756334	0.0322337
NM_018487	TMEM176A	0.755891	0.047909
NM_000589	IL4	0.755541	0.00446085
NM_007066	PKIG	0.755135	0.0252176
CR599754	NA	0.75504	0.0311218
NM_001008712	RBPMS	0.754653	0.0321205
NM_003445	ZNF155	0.75406	0.0470102
XM_930104	NA	0.749374	0.0369322
NM_003607	CDC42BPA	0.747609	0.0320647
NM_001006637	RAB37	0.737124	0.0476851
NM_006076	AGFG2	0.733398	0.0251306
DQ023517	SLC3A1	0.733204	0.0477611
NM_001566	INPP4A	0.732512	0.0457393
AB100373	SPHK2	0.730127	0.0288178
BC101118	ZNF792	0.730026	0.0167765
BC040508	PRRT3	0.72578	0.0471874
NM_006992	LRRC23	0.725617	0.0245438
NM_006991	ZNF197	0.724696	0.0342357
AK123697	NA	0.724627	0.0250847
BC104983	BMF	0.720665	0.0246252
NM_018474	KIZ	0.720114	0.0491316
BC029542	CDRT4	0.71663	0.0187243
BC040966	SIAE	0.709161	0.0412828
NM_206808	CLYBL	0.706373	0.04355
BC007021	FABP3	0.700825	0.0297521
NM_018700	TRIM36	0.700517	0.0373594
BC003608	RBPMS	0.697439	0.0157448
BC012622	PRKAA1	0.69728	0.0436945
XM_371320	NA	0.696763	0.0379308
XM_930738	NA	0.696229	0.048164
BC073923	COQ10A	0.695811	0.00983987
BC047098	LOC641367	0.692324	0.040497
X83705	PDGFB	0.692159	0.0436433
NM_017790	RGS3	0.684413	0.0381862
AL136931	MARC2	0.679301	0.039144
NM_015395	TECPR1	0.677861	0.0449159
BC006357	PCSK7	0.674486	0.0469366
AK057290	ZNF565	0.67442	0.0137154
NM_014011	SOCS5	0.673688	0.0468491
NM_001031688	NA	0.669461	0.0392752
NM_152890	COL24A1	0.665981	0.0182456
BC036947	TBC1D16	0.663362	0.0411585
NM_005108	XYLB	0.663329	0.0230323
BC069623	TIGD7	0.661857	0.041311
AK127326	JADE1	0.660078	0.0384682
NM_001032374	ZNF226	0.658269	0.0364122
AK023479	CNNM2	0.656928	0.00833077
BC100808	SLC2A11	0.653001	0.0465292
NM_174890	ZFAND4	0.650799	0.0387516
NM_018050	MANSC1	0.649706	0.0291362
AK092281	ACSS2	0.646978	0.0135394
NM_018964	SLC37A1	0.644152	0.0311442
BC009291	SEPTIN6	0.643169	0.0474209
AK057014	COQ10A	0.63789	0.0422774
NM_003561	PLA2G10	0.633664	0.0493636
XM_928639	NA	0.630268	0.0418789
AY349358	MEIS2	0.626094	0.0256447
NM_152558	IQCE	0.624962	0.0350254
NM_181501	ITGA1	0.624772	0.039873
NM_182488	USP12	0.62288	0.0374542
BC046129	GALNT7	0.622567	0.0356017
AK126015	NA	0.611788	0.0247109
NM_145290	ADGRA3	0.607866	0.0441272
AK126468	ADCY4	0.599409	0.0434579
XM_927278	NA	0.594892	0.0168968
NM_017714	TASP1	0.590937	0.0251831
BC050431	MEIS2	0.588031	0.0467789
NM_022117	TSPYL2	0.586652	0.0233952
BC011524	OTULINL	0.578751	0.0471851
NM_021106	NA	0.577276	0.0372862
BC016480	PPM1D	0.576848	0.045654
NM_006494	ERF	0.571493	0.0313486
NM_013398	ZNF224	0.560965	0.0312906
NM_178170	NEK8	0.559183	0.0254154
AF177761	ERBB2	0.558943	0.0216168
AB076384	XBP1	0.557365	0.044829
BC112115	RRN3P1	0.551138	0.0225976
AK000728	C17orf80	0.549191	0.0388158
NM_018346	RSAD1	0.547287	0.0185259
AK001243	VPS13C	0.546451	0.0233143
NM_198941	SERINC3	0.541839	0.0274464
NM_182490	ZNF227	0.540898	0.026101
NM_001032292	ZNF174	0.53901	0.0183817
BC022364	CFL2	0.537333	0.0476891
BC025266	TASP1	0.523686	0.0460408
BC105028	SCML1	0.495602	0.0433855
XM_928274	NA	0.488573	0.0432037
BC007919	STARD10	0.484566	0.00878785
AK094201	ZBTB38	0.481158	0.0292847
BC099709	DCAF8	0.465695	0.048231
NM_018116	MSTO1	0.439478	0.0446681
AY050631	LRCH1	0.411843	0.03416
AF111708	MSTO1	0.381625	0.0465864
XM_926809	NA	-0.32778	0.038568
XM_377761	NA	-0.336339	0.0420175
BC028093	MTPN	-0.346412	0.0311484
NM_005620	S100A11	-0.365054	0.0265713
NM_003095	SNRPF	-0.365073	0.0365391
U50523	ARPC2	-0.373493	0.0304577
XM_934173	NA	-0.374124	0.0467767
NM_016946	F11R	-0.379298	0.0253316
NM_023079	UBE2Z	-0.386365	0.0456741
BC112920	NA	-0.400921	0.034038
BC009411	WDR77	-0.411087	0.0424897
NM_021249	SNX6	-0.41369	0.0262136
BC108281	YWHAZ	-0.415447	0.0217862
XM_930828	NA	-0.420626	0.0424587
XM_931726	NA	-0.427857	0.00600536
BC005186	MRPS18C	-0.428648	0.0325331
BC015403	TPM3	-0.429268	0.0318284
XM_933852	NA	-0.439534	0.0154245
AF308601	NOTCH2	-0.443917	0.0469284
BC016654	RAN	-0.453416	0.0436326
NM_030979	PABPC3	-0.463894	0.0242392
AB002382	TMX2-CTNND1	-0.463941	0.0416172
NM_014874	MFN2	-0.464465	0.0365275
NM_001012989	UBE2NL	-0.46467	0.00586065
BC001594	ADIPOR1	-0.465589	0.0467397
BC023520	PABPC1	-0.465695	0.0261784
BC050292	FDPSP2	-0.466057	0.0473508
NM_002268	KPNA4	-0.471299	0.0336271
BC069613	PAK2	-0.473645	0.0318168
XM_929535	NA	-0.475075	0.00377144
NM_139283	PPTC7	-0.476229	0.0315995
BC056867	YWHAQ	-0.481475	0.0483016
NM_006452	PAICS	-0.491097	0.040904
BC019890	MPZL1	-0.492491	0.0164502
BC004949	TUBA1C	-0.493296	0.00936838
NM_001029891	PGAM4	-0.495678	0.00955399
NM_001011	RPS7	-0.498583	0.0322937
BC050601	YWHAQ	-0.498966	0.0338411
NM_005872	BCAS2	-0.499282	0.00852101
NM_152308	RMI2	-0.502986	0.0334092
BC070129	TPI1	-0.503228	0.0122039
NM_022067	VIPAS39	-0.504198	0.0290579
BC006477	WDR77	-0.505229	0.0100569
NM_001349	DARS1	-0.506101	0.0160537
BC006458	CKS2	-0.508063	0.0498294
CR598918	NA	-0.508318	0.0499882
AK097302	NA	-0.508598	0.04636
CR612818	NA	-0.508982	0.02841
XM_931734	NA	-0.509232	0.0183575
BC071848	RTN4	-0.512436	0.0341708
NM_006164	NFE2L2	-0.516808	0.0374251
XM_292836	NA	-0.517469	0.0230196
NM_018944	MIS18A	-0.517622	0.0428226
BC009611	SELENOT	-0.519614	0.0223671
NM_021807	EXOC4	-0.522055	0.035907
BC018478	EBPL	-0.523061	0.0217726
NM_003707	RUVBL1	-0.523871	0.0249605
CR621093	NA	-0.524772	0.0489677
NM_000100	CSTB	-0.524777	0.044602
BC021211	REPS1	-0.52486	0.0439745
NM_015955	MEMO1	-0.525676	0.0366981
AF285758	KARS1	-0.526198	0.0111087
XM_929391	NA	-0.526994	0.0415119
BC002866	RPS7	-0.527779	0.0306273
BC113746	OAS3	-0.532737	0.0455015
BC041604	CDC42SE1	-0.533896	0.0234298
NM_001905	CTPS1	-0.536877	0.0243101
BC058032	GPATCH2L	-0.537148	0.0321516
BC000137	CDT1	-0.541216	0.0445563
U79286	PRMT2	-0.544508	0.0217436
BC016277	HEBP1	-0.544546	0.0384955
NM_014280	DNAJC8	-0.547775	0.0146024
BC001651	CDCA8	-0.549595	0.036545
BC002342	CORO1C	-0.549898	0.0212065
NM_032303	HSDL2	-0.54998	0.0396639
NM_001031716	NABP1	-0.550583	0.0458295
BC109313	CSE1L	-0.551047	0.0359477
NM_015455	CNOT6	-0.552301	0.0337864
NM_018491	CBWD1	-0.553683	0.0468773
NM_006290	TNFAIP3	-0.557542	0.0358806
BC003395	UBE2D3	-0.558768	0.0429626
NM_003135	SRP19	-0.561384	0.0488409
NM_000291	PGK1	-0.562196	0.0358297
BC023552	SFN	-0.565607	0.0108931
NM_001003652	SMAD2	-0.56808	0.0370009
NM_002300	LDHB	-0.57366	0.0497039
BC009944	STX6	-0.57441	0.0103294
XM_934464	NA	-0.574983	0.0383283
BC005020	PPIF	-0.576428	0.0178825
NM_032565	EBPL	-0.578806	0.00810278
BC010163	PERP	-0.578882	0.0173085
XM_929316	NA	-0.579039	0.0385691
AB209399	GPD2	-0.579292	0.038666
BC074994	CASP5	-0.579434	0.0242392
BC012444	CLIC4	-0.579504	0.0331351
AK095649	NDRG1	-0.581688	0.0467678
NM_004898	CLOCK	-0.581774	0.0337216
NM_001378	DYNC1I2	-0.584065	0.0211951
NM_001034025	ERP29	-0.586131	0.0456965
XM_933210	NA	-0.586847	0.0266758
XM_933170	NA	-0.586915	0.0302755
BC001798	SNX6	-0.587755	0.019125
BC021021	EBPL	-0.588297	0.0395665
XM_934786	NA	-0.58974	0.0335538
XM_933613	NA	-0.591245	0.0449962
BC005960	ATP5PB	-0.591731	0.0175369
NM_020135	WRNIP1	-0.59572	0.0472921
BC071765	TYW3	-0.595746	0.0415232
NM_001321	CSRP2	-0.595997	0.0101598
BC005366	ATP5PB	-0.596809	0.0194118
NM_030621	DICER1	-0.59779	0.0182892
BX537896	STYXL1	-0.597914	0.0248956
BC073152	EBPL	-0.597959	0.0260642
NM_017896	GID8	-0.600086	0.0419888
M29550	PPP3CB	-0.602311	0.0294162
BC013131	ARL8B	-0.602492	0.0493584
BC013883	TMEM134	-0.60279	0.041307
NM_018425	PI4K2A	-0.606604	0.0106877
NM_013352	DSE	-0.608461	0.0169344
BC107723	NABP1	-0.609157	0.0262433
NM_002629	PGAM1	-0.610518	0.00236222
AK123108	AFAP1L2	-0.613114	0.0135631
NM_024854	PYROXD1	-0.613259	0.0410942
XM_933148	NA	-0.614005	0.0354375
XM_933453	NA	-0.614094	0.0448402
NM_198991	KCTD1	-0.614102	0.0416135
NM_016433	GLTP	-0.615616	0.0216214
BC007668	DDX3X	-0.620837	0.0224491
BC009409	TACSTD2	-0.621825	0.0470356
BC000610	FGGY	-0.622083	0.0377823
BC079834	NA	-0.622575	0.0195738
BC036023	PLK4	-0.623884	0.0473746
BC014437	GINS3	-0.625076	0.0404281
BC031558	INKA2	-0.625855	0.0441444
NM_001029835	CCM2	-0.625869	0.0410328
NM_003594	TTF2	-0.62659	0.00374547
AF239726	C21orf91	-0.626636	0.036105
NM_006218	PIK3CA	-0.626774	0.0279474
BC030568	RPS10P7	-0.627427	0.0095245
XM_929457	NA	-0.628237	0.0360616
NM_018304	PRR11	-0.630232	0.0448364
CR749841	CUL9	-0.631587	0.0467429
BC104978	TMEM165	-0.633352	0.0458519
NM_006145	DNAJB1	-0.633637	0.017426
NM_174928	EEF1AKMT1	-0.634768	0.0398501
XM_931828	NA	-0.634893	0.00599856
BC023528	GLRX5	-0.637347	0.0305381
BC071863	HMGA1	-0.638931	0.00813212
NM_005109	OXSR1	-0.639752	0.0232773
NM_018348	CMTR2	-0.640151	0.025193
NM_014992	DAAM1	-0.641898	0.0144212
NM_030952	NUAK2	-0.643145	0.0269215
NM_080388	S100A16	-0.644889	0.0471603
BC015934	GLO1	-0.64522	0.0398096
XM_377521	NA	-0.647937	0.0214744
NM_016095	GINS2	-0.648364	0.0348069
BX537920	SENP1	-0.653311	0.0341178
NM_017816	LYAR	-0.654772	0.0252395
NM_013277	RACGAP1	-0.655776	0.0234881
BC037905	CRADD	-0.65686	0.0448391
NM_002938	RNF4	-0.658239	0.0416472
XM_930396	NA	-0.658598	0.023054
NM_020699	GATAD2B	-0.658612	0.0467886
BC047584	UBE2R2	-0.660031	0.0448706
NM_017815	HAUS4	-0.661232	0.0474174
AF132946	MTERF3	-0.663398	0.0277426
NM_024819	DCAKD	-0.666207	0.0358615
NM_183416	KIF1B	-0.666679	0.0110076
NM_001018000	KAZN	-0.668266	0.0216445
BC066959	PGAM1	-0.670026	0.00123346
NM_002813	PSMD9	-0.672301	0.0211125
XM_926299	NA	-0.672885	0.00715079
AY271314	SUGT1	-0.673065	0.0424829
NM_013296	GPSM2	-0.673519	0.0118077
NM_015154	MESD	-0.675155	0.0447431
NM_003677	DENR	-0.676118	0.0348022
AF208043	IFI16	-0.677108	0.0189841
NM_016551	TM7SF3	-0.677462	0.00655662
AB003333	HSPH1	-0.677588	0.0374027
BC032729	XIAP	-0.678556	0.0425886
NM_001688	ATP5PB	-0.679813	0.0127473
NM_024605	ARHGAP10	-0.680358	0.0178697
NM_006246	PPP2R5E	-0.682143	0.03981
NM_000376	VDR	-0.682854	0.0316634
NM_001315	MAPK14	-0.684738	0.0338045
NM_001033563	NSRP1	-0.686072	0.00387421
NM_020860	STIM2	-0.686471	0.0384506
BC050691	DERL1	-0.687545	0.0418579
NM_001003941	OGDH	-0.688477	0.0361601
NM_012316	KPNA6	-0.689654	0.00497128
BC018190	MT1X	-0.69041	0.0473848
NM_001993	F3	-0.692969	0.0462011
BC009712	ABCD3	-0.693402	0.0302582
BC001550	SFN	-0.693968	0.007071
NM_005952	MT1X	-0.694297	0.0192732
AK058160	MRPS5	-0.694984	0.00302354
NM_006142	SFN	-0.695186	0.00298764
BC067803	CBWD5	-0.697664	0.0272269
NM_006665	HPSE	-0.698143	0.0260975
NM_025061	LRRC8E	-0.699742	0.0337505
CR601704	NA	-0.700095	0.0226018
BC019924	TUBB	-0.700739	0.0171394
NM_001444	FABP5	-0.700966	0.0386347
XM_934477	NA	-0.701284	0.00221271
NM_000148	FUT1	-0.702676	0.0306436
NM_001011663	PCGF6	-0.70432	0.0413302
XM_930219	NA	-0.704388	0.0211865
NM_001004431	METRNL	-0.706726	0.0295002
NM_002535	OAS2	-0.70678	0.028814
BC000995	SFN	-0.706894	0.00763463
NM_002353	TACSTD2	-0.708657	0.0187224
BC018979	DCAF4	-0.708817	0.0374094
NM_006353	HMGN4	-0.710488	0.0319277
BC021556	PDLIM2	-0.710683	0.0360863
NM_005101	ISG15	-0.711041	0.0208419
AB102869	PMS1	-0.711685	0.0486519
BC035214	SRPK2	-0.712121	0.0053787
BC007580	AJUBA	-0.712396	0.0335293
CR749276	ZFYVE26	-0.712852	0.0498824
NM_024050	DDA1	-0.713765	0.0146674
NM_017421	COQ3	-0.713946	0.0441483
NM_001003697	ATP5PF	-0.715493	0.00589686
AK098414	NA	-0.71591	0.0347392
XM_931820	NA	-0.716276	0.0119838
NM_000883	IMPDH1	-0.717828	0.0346461
BC110526	CDC7	-0.718129	0.0381441
BC008765	SDC1	-0.719238	0.0209916
BC032532	MLLT10	-0.720042	0.0323798
BC037212	CBWD1	-0.721737	0.0491813
BC065551	WIPF2	-0.723017	0.0467806
NM_016623	FAM49B	-0.723453	0.0498632
NM_182570	NA	-0.723491	0.0434179
BC008446	NAA20	-0.723672	0.0340003
NM_006599	NFAT5	-0.72414	0.0432374
AL137707	NA	-0.724537	0.0430442
NM_006187	OAS3	-0.725134	0.0205768
AK123537	LOC100129617	-0.72531	0.0309741
NM_015282	CLASP1	-0.725359	0.0282911
BC065205	HEATR1	-0.726908	0.0462235
BC020891	HLA-J	-0.727004	0.00616184
XM_931046	NA	-0.72917	0.0160756
BC010389	PDHX	-0.731417	0.0143206
BC010648	BRF2	-0.73355	0.0141695
BC034378	RPL23	-0.733745	0.028173
XM_933351	NA	-0.734128	0.0483905
XM_372058	NA	-0.734339	0.0159038
NM_001001936	AFAP1L2	-0.734576	0.00696131
AF398509	PANX1	-0.735761	0.0483024
NM_032876	AJUBA	-0.736279	0.0151056
BC001148	RAB31	-0.736785	0.0446605
NM_000405	GM2A	-0.737886	0.0114741
BC067752	RWDD4	-0.738396	0.0243962
NM_198141	GANC	-0.739756	0.00859478
NM_017447	C21orf91	-0.739802	0.0420365
BC066647	KIAA0586	-0.741715	0.0414253
NM_022787	NMNAT1	-0.743039	0.033529
AF497245	NA	-0.743694	0.0326961
BC051874	CROT	-0.745086	0.0440072
NM_007233	TP53TG1	-0.745486	0.0140699
XM_928328	NA	-0.745493	0.0356106
BC002390	EI24	-0.74584	0.0397159
NM_001007214	CACYBP	-0.74669	0.0455605
BC011790	TUBA1C	-0.746766	0.0142906
NM_014325	CORO1C	-0.746911	0.000231435
NM_001010891	MTX3	-0.747307	0.0429796
BC059364	PTGR2	-0.747371	0.0230629
NM_001039843	NA	-0.747465	0.0431831
NM_020432	PHTF2	-0.748015	0.0372382
NM_012423	RPL13A	-0.748223	0.0461826
BC024231	RBM28	-0.748274	0.0436135
NM_001793	CDH3	-0.748981	0.0099101
BC065272	VANGL1	-0.75039	0.0491673
BC071974	SPIN2B	-0.750702	0.0330679
BC023553	CHRNB1	-0.751226	0.033199
XM_933156	NA	-0.752536	0.00893428
BC000302	DLST	-0.754065	0.0176582
NM_004220	ZNF213	-0.755002	0.0440222
BC009959	SLC27A4	-0.755478	0.0359012
NM_006663	PPP1R13L	-0.757529	0.0078876
NM_015368	PANX1	-0.757701	0.0386419
NM_003274	TRAPPC10	-0.758463	0.045277
NM_002735	PRKAR1B	-0.760452	0.0249265
BC026234	KATNBL1	-0.760883	0.0379933
BC109062	ZNF562	-0.761912	0.0318758
BC000907	VANGL1	-0.762888	0.0166124
BC065832	POMC	-0.76432	0.0366593
CR598283	NA	-0.765007	0.0176487
NM_007189	ABCF2	-0.765635	0.0331187
NM_019900	ABCC1	-0.765981	0.031798
XM_934365	NA	-0.766205	0.0100527
AK024389	NA	-0.767022	0.0366771
NM_017588	WDR5	-0.767463	0.0341391
NM_019024	HEATR5B	-0.768898	0.0352188
XM_930499	NA	-0.769055	0.0170506
BC007714	DDIT4	-0.773134	0.0419416
NM_006874	ELF2	-0.773339	0.0376411
NM_021183	RAP2C	-0.773648	0.0141227
NM_031423	NUF2	-0.774701	0.0350491
XM_933219	NA	-0.77498	0.017429
BC042844	CASP10	-0.775401	0.0399225
NM_003322	TULP1	-0.775414	0.0128027
NM_033043	CGB5	-0.775424	0.0393263
BC002827	TPM4	-0.776056	0.01659
AK026147	NUDT18	-0.77652	0.0483492
NM_004292	RIN1	-0.778451	0.0321744
CR749265	KLHL8	-0.779011	0.0330815
BC112007	ALX3	-0.779808	0.00535049
BC040191	SLC35E4	-0.780231	0.010299
BC018610	LAS1L	-0.781404	0.0197598
NM_023939	CENPBD1P1	-0.784367	0.0209261
NM_005817	PLIN3	-0.785651	0.0358075
BC002495	BAIAP2	-0.785862	0.0485517
AF212253	CBWD1	-0.786069	0.0102875
AL832321	EFCAB11	-0.78617	0.0374625
NM_001008541	MXI1	-0.786708	0.014261
NM_147202	FAM219A	-0.787432	0.0271788
AB028949	NA	-0.790319	0.00457987
BC040950	MED20	-0.790729	0.0490309
U58087	CUL1	-0.792228	0.0307879
NM_153710	STKLD1	-0.793336	0.0424191
NM_145295	ZNF627	-0.794123	0.0412281
NM_006317	BASP1	-0.794143	0.010429
NM_030916	NECTIN4	-0.794303	0.0289617
NM_000565	IL6R	-0.794516	0.0252478
BC025407	LAYN	-0.795563	0.0426103
NM_024820	DENND1A	-0.795696	0.0492864
AK127505	NA	-0.796248	0.0262804
AK127315	LINC02035	-0.796643	0.0253289
NM_030588	DHX9	-0.797505	0.0227637
NM_021218	INIP	-0.797822	0.0178503
XM_933204	NA	-0.798105	0.0269848
BC048989	INO80C	-0.799145	0.0473302
NM_138779	TEX30	-0.799538	0.0426405
BC034990	MTMR9	-0.799992	0.0356608
[truncated: 1,596 more rows]
