# Supplementary figures and images for: Molecular Differences between Squamous Cell Carcinoma and Adenocarcinoma Cervical Cancer Subtypes: Potential Prognostic Biomarkers
Source: MDPI journal article supplement (doi:10.3390/curroncol29070372), 2022-07-04

Figure S1. GABRB2, TSPAN8 and TMEM40 Overall survival of TCGA CC patients.

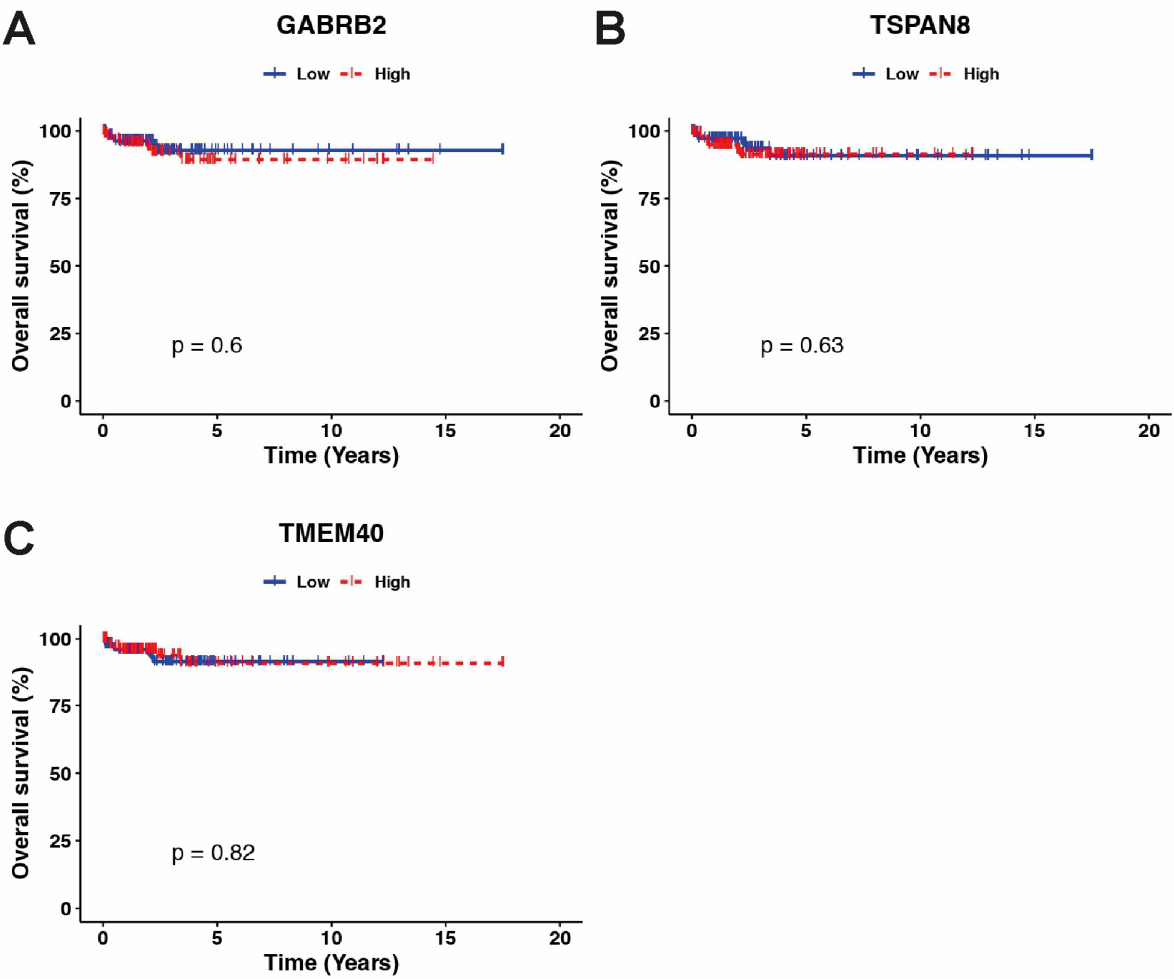

Supplement: s1 [file s1]
